# Supplementary material for: Stereoselective migratory heteroaryltrifluoromethylation of allylic amines via electrosynthesis
Source: Royal Society of Chemistry journal article supplement (doi:10.1039/d2gc00960a), 2022-01-01
Supplement: d2gc00960a1.pdf [file d2gc00960a1.pdf]

**Supplementary Information**

**Stereoselective Migratory Heteroaryltrifluoromethylation of Allylic Amine via  
Electrosynthesis**

Jianyong Lan, Kejun Lin, Xing Zhang, and Tingshun Zhu\*

*School of Chemistry, Sun Yat-Sen University, Guangzhou 510275, P.R. China*

## Table of Contents

|                                                             |     |
|-------------------------------------------------------------|-----|
| 1. General Information.....                                 | 1   |
| 2. General procedure for the preparation of substrates..... | 2   |
| 3. Optimization of reaction conditions <sup>a</sup> .....   | 16  |
| 4. General procedure of the electrolysis .....              | 17  |
| 5. Functional group compatibility .....                     | 18  |
| 6. Characterization data of electrolysis products .....     | 20  |
| 7. Product transformation.....                              | 37  |
| 8. Mechanistic Experiments .....                            | 39  |
| 9. X-Ray Crystallographic Data .....                        | 45  |
| 10. NMR Spectra for new compounds.....                      | 46  |
| 9. Reference.....                                           | 155 |

## 1. General Information

Commercial reagents were purchased from TCI, J&K, 3A Chemicals, Accela, Macklin or Adamas and used without further purification. The solvents used in the experiments were all purchased anhydrous solvents and used directly. All reactions were carried out with oven-dried glassware. Analytical thin layer chromatography was performed on 0.20 mm silica gel HSGF-254 plates (Huanghai, China), and visualized under 254 nm UV light. Column chromatography was performed on 200-300 mesh silica gel or 300-400 mesh silica gel (General-Reagent, China).

$^1\text{H}$ ,  $^{19}\text{F}$  and  $^{13}\text{C}$  NMR spectra were recorded on an Bruker Ascend 400MHz or 500MHz spectrometer and Bruker Ultrashield 300MHz, at ambient temperature unless otherwise stated. Chemical shifts were recorded in parts per million (ppm,  $\delta$ ) relative to chloroform (for  $^1\text{H}$  NMR,  $\delta = 7.26$  ppm; for  $^{13}\text{C}$  NMR,  $\delta = 77.16$  ppm) and dimethyl sulfoxide ( $^1\text{H}$  NMR,  $\delta = 2.50$  ppm; for  $^{13}\text{C}$  NMR,  $\delta = 39.52$  ppm).  $^1\text{H}$  NMR splitting patterns are designated as singlet (s), doublet (d), triplet (t), quartet (q), dd (doublet of doublets); m (multiplets), and etc. All first-order splitting patterns were assigned on the basis of the appearance of the multiplet. Splitting patterns that could not be easily interpreted are designated as multiplet (m) or broad (br).

High resolution mass spectra of new compounds were recorded on LTQ Orbitrap Elite LC/MS (ESI or APCI) or MAT 95XP (Thermo, EI). Infrared (IR) spectra were recorded on PerkinElmer Frontier spectrometer and reported in wave numbers ( $\text{cm}^{-1}$ ). X-ray diffraction data was collected on Rigakuoxford diffraction SuperNova using the  $\text{CuK}\alpha$  radiation at 150 K. Optical rotations were recorded on an Anton Paar MCD-200 polarimeter. The determination of Diastereoisomer ratio and enantiomeric excesses were performed via Waters Acquity UltraPerformance Convergence Chromatography (UPCC) and determined by SFC (supercritical fluid  $\text{CO}_2$  chromatography)-MS. The cyclic voltammetry was carried out with a Metrohm Autolab M204 workstation. The detection of sulfates was performed via Metrohm 882 ionic chromatography.

## 2. General procedure for the preparation of substrates

- 1). sulfonyl chlorides were prepared according to previous procedure.<sup>1,2</sup>
- 2). 3-methylbut-2-en-1-amine,<sup>3</sup> (S)-but-3-en-2-amine,<sup>4</sup> (S)-1-phenylbut-3-en-2-amine<sup>4</sup> and (S)-1-phenylprop-2-en-1-amine<sup>5</sup> were prepared according to previous procedure.
- 3). general procedure for substrates **1a-1e**, **1g-1m**, **3o-3u**.<sup>6</sup>

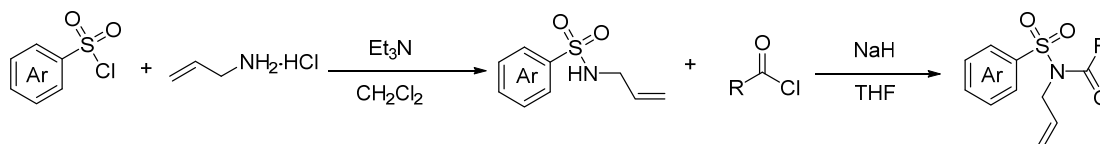

To a solution of Allylamine hydrochloride (1.5 equiv.) and Et<sub>3</sub>N (3.0 equiv.) in dry DCM was added aryl sulfonyl chloride (1.0 equiv.) in small portions over five minutes in 0 °C. The reaction mixture was stirred for overnight at room temperature. The reaction mixture was washed with 1N HCl (2 x 25 mL), water (25 mL) and brine. The organic phase was dried over Na<sub>2</sub>SO<sub>4</sub>, filtered and evaporated in *vacuo* to get the *N*-allyl arylsulfonamide. The compound was used without purification. To a solution of NaH (1.2 equiv.) in THF at 0 °C was added *N*-allyl arylsulfonamide and stirred for 40 min. the mixture was treated with acyl chloride (1.5 equiv.) and stirred at room temperature for 3 h. the reaction was quenched with water and the aqueous layer was extracted with ethyl acetate, washed with brine, dried over MgSO<sub>4</sub>, filtered and evaporated in *vacuo*. The residue was purified by column chromatography.

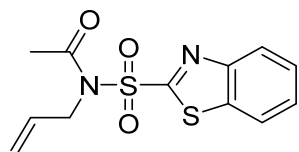

***N*-allyl-*N*-(benzo[d]thiazol-2-ylsulfonyl)acetamide (1a)**: Silica gel column chromatography (petroleum ether/ethyl acetate = 5:1), white solid; 300 mg, yield = 48% over 2 steps; <sup>1</sup>H NMR (400 MHz, CDCl<sub>3</sub>) δ 8.20 (d, *J* = 7.9 Hz, 1H), 8.02 (d, *J* = 7.9 Hz, 1H), 7.64 (dt, *J* = 16.0, 7.2 Hz, 2H), 5.92 (ddt, *J* = 16.2, 10.6, 5.8 Hz, 1H), 5.34 (d, *J* = 18.0 Hz, 1H), 5.22 (d, *J* = 10.3 Hz, 1H), 4.55 (d, *J* = 5.7 Hz, 2H), 2.62 (s, 3H). <sup>13</sup>C {<sup>1</sup>H} NMR (101 MHz, CDCl<sub>3</sub>) δ 170.3, 164.4, 151.9, 136.6, 132.1, 128.3, 127.8, 125.5, 122.2, 118.7, 49.5, 25.3. HR-MS (ESI) *m/z*: [M+Na]<sup>+</sup> Calcd for C<sub>12</sub>H<sub>12</sub>N<sub>2</sub>O<sub>3</sub>S<sub>2</sub>Na<sup>+</sup> 319.0182, found: 319.0180. IR *v*<sub>max</sub> (film, cm<sup>-1</sup>): 2920, 1712, 1369, 1227, 1172, 964, 762, 619.

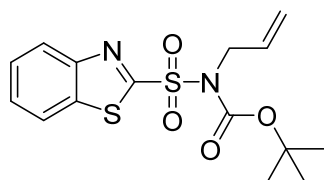

**tert-butyl allyl(benzo[d]thiazol-2-ylsulfonyl)carbamate (1b)**: Silica gel column chromatography (petroleum ether/ethyl acetate = 8:1), colorless oil; 382 mg, yield = 52% over 2 steps. <sup>1</sup>H NMR (400 MHz, CDCl<sub>3</sub>) δ 8.21 (d, *J* = 8.1 Hz, 1H), 8.01 (d, *J* = 7.7 Hz, 1H), 7.62 (dt, *J* = 16.0, 7.2 Hz, 2H), 6.09 (ddt, *J* = 16.2, 11.1, 5.8 Hz, 1H), 5.43 (d, *J* = 17.1 Hz, 1H), 5.31 (d, *J* = 10.3 Hz, 1H), 4.59 (d, *J* = 5.6 Hz, 2H), 1.37 (s, 9H). <sup>13</sup>C {<sup>1</sup>H} NMR (101 MHz, CDCl<sub>3</sub>) δ 165.1, 151.8, 150.2, 136.7, 132.8, 127.9, 127.5, 125.4, 122.1, 118.2, 85.6, 50.1, 27.8. HR-MS (ESI) *m/z*: [M+Na]<sup>+</sup> Calcd for

C<sub>15</sub>H<sub>18</sub>N<sub>2</sub>O<sub>4</sub>S<sub>2</sub>Na<sup>+</sup> 377.0600, found: 377.0596. IR  $\nu_{\max}$  (film, cm<sup>-1</sup>): 2930, 1733, 1450, 1366, 1140, 1085, 760, 624.

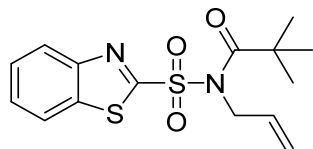

**N-allyl-N-(benzo[d]thiazol-2-ylsulfonyl)pivalamide (1c):** Silica gel column chromatography (petroleum ether/ethyl acetate = 5:1), white solid; 311 mg, yield = 46% over 2 steps. <sup>1</sup>H NMR (400 MHz, CDCl<sub>3</sub>)  $\delta$  8.15 (d,  $J$  = 7.7 Hz, 1H), 7.97 (d,  $J$  = 7.9 Hz, 1H), 7.57 (p,  $J$  = 7.2 Hz, 2H), 6.05 (ddt,  $J$  = 15.8, 10.3, 5.1 Hz, 1H), 5.39 (d,  $J$  = 17.2 Hz, 1H), 5.31 (d,  $J$  = 10.6 Hz, 1H), 4.72 (d,  $J$  = 4.8 Hz, 2H), 1.30 (s, 9H). <sup>13</sup>C {<sup>1</sup>H} NMR (101 MHz, CDCl<sub>3</sub>)  $\delta$  180.8, 165.6, 151.8, 137.0, 133.2, 127.8, 127.3, 125.3, 122.2, 118.6, 50.7, 42.2, 27.8. HR-MS (ESI)  $m/z$ : [M+H]<sup>+</sup> Calcd for C<sub>15</sub>H<sub>19</sub>N<sub>2</sub>O<sub>3</sub>S<sub>2</sub><sup>+</sup> 339.0832, found: 339.0829. IR  $\nu_{\max}$  (film, cm<sup>-1</sup>): 2930, 1687, 1475, 1360, 1168, 1083, 8353 761, 619.

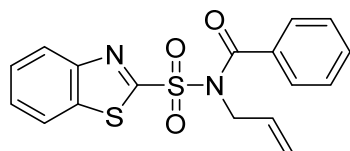

**N-allyl-N-(benzo[d]thiazol-2-ylsulfonyl)benzamide (1d):** Silica gel column chromatography (petroleum ether/ethyl acetate = 5:1), yellow oil; 372 mg, yield = 52% over 2 steps. <sup>1</sup>H NMR (400 MHz, CDCl<sub>3</sub>)  $\delta$  8.20 (d,  $J$  = 8.1 Hz, 1H), 8.01 – 7.95 (m, 1H), 7.60 (h,  $J$  = 7.1, 6.7 Hz, 4H), 7.52 (t,  $J$  = 7.5 Hz, 1H), 7.39 (t,  $J$  = 7.7 Hz, 2H), 6.04 (ddt,  $J$  = 16.4, 11.3, 5.8 Hz, 1H), 5.25 – 5.22 (m, 1H), 5.20 (d,  $J$  = 10.7 Hz, 1H), 4.62 (d,  $J$  = 5.8 Hz, 2H). <sup>13</sup>C {<sup>1</sup>H} NMR (101 MHz, CDCl<sub>3</sub>)  $\delta$  171.4, 164.9, 151.9, 137.0, 133.9, 132.5, 132.4, 128.4, 128.4, 128.1, 127.6, 125.5, 122.3, 119.3, 51.9. HR-MS (ESI)  $m/z$ : [M+H]<sup>+</sup> Calcd for C<sub>12</sub>H<sub>12</sub>N<sub>2</sub>O<sub>3</sub>S<sub>2</sub>Na<sup>+</sup> 319.0182, found: 319.0180. HR-MS (ESI)  $m/z$ : [M+H]<sup>+</sup> Calcd for C<sub>17</sub>H<sub>15</sub>N<sub>2</sub>O<sub>3</sub>S<sub>2</sub><sup>+</sup> 359.0519, found: 359.0515. IR  $\nu_{\max}$  (film, cm<sup>-1</sup>): 2926, 1691, 1412, 1369, 1170, 1023, 727, 620.

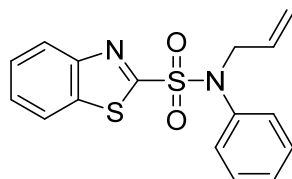

**N-allyl-N-phenylbenzo[d]thiazole-2-sulfonamide :** Silica gel column chromatography (petroleum ether/ethyl acetate = 8:1), yellow solid; 396 mg, yield = 60% over 2 steps. <sup>1</sup>H NMR (400 MHz, CDCl<sub>3</sub>)  $\delta$  8.26 (d,  $J$  = 8.2 Hz, 1H), 7.96 (d,  $J$  = 8.0 Hz, 1H), 7.69 – 7.62 (m, 1H), 7.62 – 7.53 (m, 1H), 7.33 (m, 3H), 7.28 – 7.20 (m, 2H), 5.89 (m, 1H), 5.25 – 5.10 (m, 2H), 4.56 (d,  $J$  = 6.4 Hz, 2H). <sup>13</sup>C {<sup>1</sup>H} NMR (101 MHz, CDCl<sub>3</sub>)  $\delta$  165.4, 152.5, 138.2, 136.5, 132.4, 129.3, 129.1, 128.6, 127.6, 127.4, 125.3, 122.2, 119.5, 55.5. HR-MS (ESI)  $m/z$ : [M+H]<sup>+</sup> Calcd for C<sub>16</sub>H<sub>15</sub>N<sub>2</sub>O<sub>2</sub>S<sub>2</sub><sup>+</sup> 331.0570, found: 331.0564. IR  $\nu_{\max}$  (film, cm<sup>-1</sup>): 2930, 1471, 1363, 1169, 1066, 870, 762, 622.

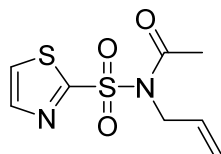

**N-allyl-N-(thiazol-2-ylsulfonyl)acetamide (1f):** Silica gel column chromatography (petroleum

ether/ethyl acetate = 2:1), yellow oil; 271 mg, yield = 55% over 2 steps.  $^1\text{H}$  NMR (400 MHz,  $\text{CDCl}_3$ )  $\delta$  7.98 (d,  $J = 3.0$  Hz, 1H), 7.72 (d,  $J = 3.1$  Hz, 1H), 5.89 – 5.78 (m, 1H), 5.29 – 5.23 (m, 1H), 5.19 – 5.13 (m, 1H), 4.47 (d,  $J = 5.7$  Hz, 2H), 2.55 (s, 3H).  $^{13}\text{C}\{^1\text{H}\}$  NMR (101 MHz,  $\text{CDCl}_3$ )  $\delta$  170.5, 164.3, 144.6, 132.1, 126.1, 118.6, 49.5, 25.3. HR-MS (ESI)  $m/z$ :  $[\text{M}+\text{H}]^+$  Calcd for  $\text{C}_8\text{H}_{10}\text{N}_2\text{O}_3\text{S}_2^+$  247.0206, found: 247.0202. IR  $\nu_{\text{max}}$  (film,  $\text{cm}^{-1}$ ): 2944, 1707, 1413, 1363, 1178, 963, 863, 730.

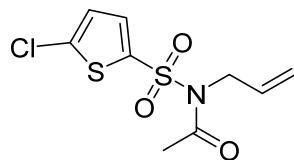

***N*-allyl-*N*-((5-chlorothiophen-2-yl)sulfonyl)acetamide (1g)**: Silica gel column chromatography (petroleum ether/ethyl acetate = 10:1), colorless oil; 296 mg, yield = 54% over 2 steps.  $^1\text{H}$  NMR (400 MHz,  $\text{CDCl}_3$ )  $\delta$  7.60 (d,  $J = 4.0$  Hz, 1H), 6.97 (d,  $J = 4.0$  Hz, 1H), 5.88 (ddt,  $J = 15.9, 10.6, 5.4$  Hz, 1H), 5.41 – 5.20 (m, 2H), 4.45 (d,  $J = 5.3$  Hz, 2H), 2.37 (s, 3H).  $^{13}\text{C}\{^1\text{H}\}$  NMR (101 MHz,  $\text{CDCl}_3$ )  $\delta$  170.1, 139.5, 137.3, 134.1, 132.1, 126.5, 118.6, 49.3, 24.6. HR-MS (ESI)  $m/z$ :  $[\text{M}+\text{H}]^+$  Calcd for  $\text{C}_9\text{H}_{11}\text{ClNO}_3\text{S}_2^+$  279.9863, found: 279.9862. IR  $\nu_{\text{max}}$  (film,  $\text{cm}^{-1}$ ): 2923, 1703, 1405, 1359, 1163, 992, 728, 604.

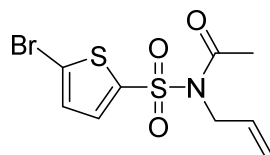

***N*-allyl-*N*-((5-bromothiophen-2-yl)sulfonyl)acetamide (1h)**: Silica gel column chromatography (petroleum ether/ethyl acetate = 10:1), colorless oil; 329 mg, yield = 51% over 2 steps.  $^1\text{H}$  NMR (400 MHz,  $\text{CDCl}_3$ )  $\delta$  7.53 (d,  $J = 4.0$  Hz, 1H), 7.08 (d,  $J = 4.1$  Hz, 1H), 5.91 – 5.80 (m, 1H), 5.30 – 5.22 (m, 2H), 4.42 (d,  $J = 5.5$  Hz, 2H), 2.35 (s, 3H).  $^{13}\text{C}\{^1\text{H}\}$  NMR (101 MHz,  $\text{CDCl}_3$ )  $\delta$  170.1, 140.4, 134.8, 132.2, 130.2, 122.4, 118.8, 49.4, 24.7. HR-MS (ESI)  $m/z$ :  $[\text{M}+\text{H}]^+$  Calcd for  $\text{C}_9\text{H}_{11}\text{BrNO}_3\text{S}_2^+$  323.9358, found: 323.9355. IR  $\nu_{\text{max}}$  (film,  $\text{cm}^{-1}$ ): 2955, 1701, 1398, 1357, 1152, 967, 836, 670.

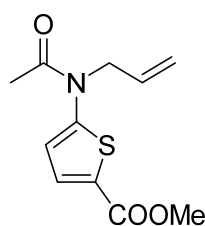

**methyl 5-(*N*-acetyl-*N*-allylsulfamoyl)thiophene-2-carboxylate (1i)**: Silica gel column chromatography (petroleum ether/ethyl acetate = 8:1), white solid; 345 mg, yield = 57% over 2 steps.  $^1\text{H}$  NMR (400 MHz,  $\text{CDCl}_3$ )  $\delta$  7.67 (d,  $J = 5.2$  Hz, 1H), 7.52 (d,  $J = 5.3$  Hz, 1H), 5.90 (ddt,  $J = 15.8, 10.2, 5.1$  Hz, 1H), 5.26 (d,  $J = 17.2$  Hz, 1H), 5.18 (d,  $J = 10.4$  Hz, 1H), 4.50 (d,  $J = 4.7$  Hz, 2H), 3.87 (s, 3H), 2.28 (s, 3H).  $^{13}\text{C}\{^1\text{H}\}$  NMR (101 MHz,  $\text{CDCl}_3$ )  $\delta$  170.6, 159.4, 142.5, 133.4, 133.0, 132.8, 129.5, 117.4, 53.1, 49.9, 24.5. HR-MS (ESI)  $m/z$ :  $[\text{M}+\text{H}]^+$  Calcd for  $\text{C}_{11}\text{H}_{14}\text{NO}_5\text{S}_2^+$  304.0308, found: 304.0303. IR  $\nu_{\text{max}}$  (film,  $\text{cm}^{-1}$ ): 2962, 1730, 1703, 1436, 1363, 1181, 1076, 841, 600.

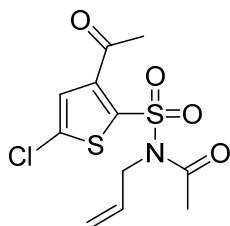

***N*-((3-acetyl-5-chlorothiophen-2-yl)sulfonyl)-*N*-allylacetamide (1j):** Silica gel column chromatography (petroleum ether/ethyl acetate = 5:1), yellow solid; 315 mg, yield = 49% over 2 steps.  $^1\text{H}$  NMR (400 MHz,  $\text{CDCl}_3$ )  $\delta$  7.20 (s, 1H), 5.90 (dq,  $J = 16.0, 4.9$  Hz, 1H), 5.27 (dd,  $J = 25.4, 13.8$  Hz, 2H), 4.60 – 4.41 (m, 2H), 2.52 (s, 3H), 2.34 (s, 3H).  $^{13}\text{C}\{^1\text{H}\}$  NMR (101 MHz,  $\text{CDCl}_3$ )  $\delta$  192.2, 170.8, 141.5, 138.1, 132.9, 128.1, 117.7, 50.3, 30.0, 24.7. HR-MS (ESI)  $m/z$ :  $[\text{M}+\text{Na}]^+$  Calcd for  $\text{C}_{11}\text{H}_{12}\text{ClNO}_4\text{S}_2\text{Na}^+$  343.9789, found: 343.9786. IR  $\nu_{\text{max}}$  (film,  $\text{cm}^{-1}$ ): 2933, 1698, 1646, 1353, 1226, 1161, 1019, 839, 631.

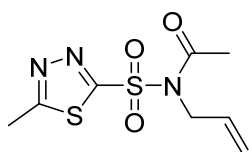

***N*-allyl-*N*-((5-methyl-1,3,4-thiadiazol-2-yl)sulfonyl)acetamide (1k):** Silica gel column chromatography (petroleum ether/ethyl acetate = 4:1), yellow oil; 288 mg, yield = 60% over 2 steps.  $^1\text{H}$  NMR (400 MHz,  $\text{CDCl}_3$ )  $\delta$  5.89 (ddt,  $J = 16.3, 11.1, 5.7$  Hz, 1H), 5.31 (d,  $J = 17.0$  Hz, 1H), 5.23 (d,  $J = 10.3$  Hz, 1H), 4.51 (d,  $J = 5.6$  Hz, 2H), 2.88 (s, 3H), 2.47 (s, 3H).  $^{13}\text{C}\{^1\text{H}\}$  NMR (101 MHz,  $\text{CDCl}_3$ )  $\delta$  170.8, 170.4, 167.3, 131.9, 119.1, 49.9, 25.0, 16.2. HR-MS (ESI)  $m/z$ :  $[\text{M}+\text{Na}]^+$  Calcd for  $\text{C}_8\text{H}_{11}\text{N}_3\text{O}_3\text{S}_2\text{Na}^+$  284.0134, found: 284.0130. IR  $\nu_{\text{max}}$  (film,  $\text{cm}^{-1}$ ): 2947, 1710, 1421, 1366, 1171, 1087, 840, 631.

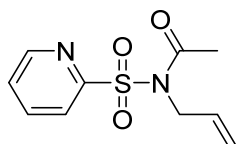

***N*-allyl-*N*-(pyridin-2-ylsulfonyl)acetamide (1m):** Silica gel column chromatography (petroleum ether/ethyl acetate = 5:1), yellow oil; 288 mg, yield = 60% over 2 steps.  $^1\text{H}$  NMR (400 MHz,  $\text{CDCl}_3$ )  $\delta$  8.68 (d,  $J = 4.6$  Hz, 1H), 8.09 (d,  $J = 7.8$  Hz, 1H), 7.95 (td,  $J = 7.8, 1.5$  Hz, 1H), 7.54 (dd,  $J = 7.6, 4.7$  Hz, 1H), 5.87 (ddt,  $J = 16.1, 10.8, 5.6$  Hz, 1H), 5.27 (d,  $J = 17.3$  Hz, 1H), 5.15 (d,  $J = 10.3$  Hz, 1H), 4.45 (d,  $J = 5.6$  Hz, 2H), 2.45 (s, 3H).  $^{13}\text{C}\{^1\text{H}\}$  NMR (101 MHz,  $\text{CDCl}_3$ )  $\delta$  171.1, 157.0, 150.3, 138.3, 132.8, 127.6, 123.2, 118.0, 49.4, 25.0. HR-MS (ESI)  $m/z$ :  $[\text{M}+\text{Na}]^+$  Calcd for  $\text{C}_{10}\text{H}_{12}\text{N}_2\text{O}_3\text{S}_2\text{Na}^+$  263.0461, found: 263.0458. IR  $\nu_{\text{max}}$  (film,  $\text{cm}^{-1}$ ): 2962, 1701, 1405, 1349, 1177, 1115, 750, 586.

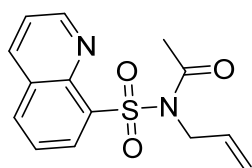

***N*-allyl-*N*-(quinolin-8-ylsulfonyl)acetamide (1n):** Silica gel column chromatography (petroleum ether/ethyl acetate = 4:1), white solid; 232 mg, yield = 40% over 2 steps.  $^1\text{H}$  NMR (400 MHz,  $\text{CDCl}_3$ )

$\delta$  8.96 (dd,  $J = 4.0, 1.5$  Hz, 1H), 8.55 (d,  $J = 7.4$  Hz, 1H), 8.23 (d,  $J = 8.3$  Hz, 1H), 8.08 (d,  $J = 8.2$  Hz, 1H), 7.64 (t,  $J = 7.8$  Hz, 1H), 7.51 (dd,  $J = 8.3, 4.2$  Hz, 1H), 5.88 (ddt,  $J = 15.8, 10.5, 5.4$  Hz, 1H), 5.24 (d,  $J = 17.2$  Hz, 1H), 5.09 (d,  $J = 10.3$  Hz, 1H), 4.57 (d,  $J = 5.3$  Hz, 2H), 2.44 (s, 3H).  $^{13}\text{C}\{^1\text{H}\}$  NMR (101 MHz,  $\text{CDCl}_3$ )  $\delta$  171.0, 151.4, 143.6, 136.6, 136.2, 134.6, 133.3, 133.3, 128.9, 125.4, 122.4, 117.2, 49.4, 25.3. HR-MS (ESI)  $m/z$ :  $[\text{M}+\text{H}]^+$  Calcd for  $\text{C}_{14}\text{H}_{15}\text{N}_2\text{O}_3\text{S}^+$  291.0798, found: 291.0795. IR  $\nu_{\text{max}}$  (film,  $\text{cm}^{-1}$ ): 2927, 1702, 1509, 1340, 1163, 830, 769, 591.

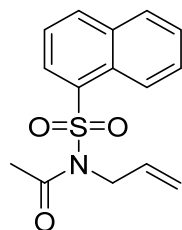

***N*-allyl-*N*-(naphthalen-1-ylsulfonyl)acetamide (1o)**: Silica gel column chromatography (petroleum ether/ethyl acetate = 10:1), white solid; 347 mg, yield = 60% over 2 steps.  $^1\text{H}$  NMR (400 MHz,  $\text{CDCl}_3$ )  $\delta$  8.41 (d,  $J = 8.6$  Hz, 1H), 8.31 – 8.25 (m, 1H), 8.13 (d,  $J = 8.2$  Hz, 1H), 7.97 (d,  $J = 8.0$  Hz, 1H), 7.73 – 7.66 (m, 1H), 7.65 – 7.54 (m, 2H), 5.91 (ddt,  $J = 15.8, 10.6, 5.5$  Hz, 1H), 5.29 (d,  $J = 17.2$  Hz, 1H), 5.21 (d,  $J = 10.3$  Hz, 1H), 4.56 (d,  $J = 5.5$  Hz, 2H), 2.29 (s, 3H).  $^{13}\text{C}\{^1\text{H}\}$  NMR (101 MHz,  $\text{CDCl}_3$ )  $\delta$  170.2, 135.4, 134.5, 134.3, 132.4, 130.6, 129.3, 128.8, 128.2, 127.2, 124.1, 123.8, 118.4, 48.9, 25.0. HR-MS (ESI)  $m/z$ :  $[\text{M}+\text{H}]^+$  Calcd for  $\text{C}_{15}\text{H}_{16}\text{NO}_3\text{S}^+$  290.0845, found: 290.0843. IR  $\nu_{\text{max}}$  (film,  $\text{cm}^{-1}$ ): 2937, 1702, 1509, 1340, 1162, 830, 769, 583.

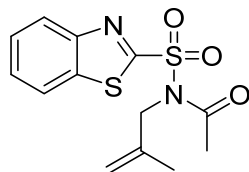

***N*-(benzo[d]thiazol-2-ylsulfonyl)-*N*-(2-methylallyl)acetamide (1p)**: Silica gel column chromatography (petroleum ether/ethyl acetate = 5:1), white solid; 285 mg, yield = 46% over 2 steps.  $^1\text{H}$  NMR (400 MHz,  $\text{CDCl}_3$ )  $\delta$  8.17 (d,  $J = 8.0$  Hz, 1H), 7.99 (d,  $J = 7.8$  Hz, 1H), 7.61 (dt,  $J = 15.5, 7.0$  Hz, 2H), 4.95 (d,  $J = 10.2$  Hz, 2H), 4.48 (s, 2H), 2.56 (s, 3H), 1.77 (s, 3H).  $^{13}\text{C}$  NMR (101 MHz,  $\text{CDCl}_3$ )  $\delta$  170.6, 164.4, 151.9, 139.5, 136.7, 128.2, 127.7, 125.5, 122.2, 112.4, 52.2, 25.0, 20.2. HR-MS (ESI)  $m/z$ :  $[\text{M}+\text{H}]^+$  Calcd for  $\text{C}_{13}\text{H}_{15}\text{N}_2\text{O}_3\text{S}_2^+$  311.0519, found: 311.0513. IR  $\nu_{\text{max}}$  (film,  $\text{cm}^{-1}$ ): 2930, 1714, 1471, 1366, 1168, 867, 761, 620.

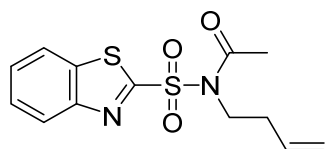

***N*-(benzo[d]thiazol-2-ylsulfonyl)-*N*-(but-3-en-1-yl)acetamide (1q)**: Silica gel column chromatography (petroleum ether/ethyl acetate = 5:1), white solid; 298 mg, yield = 48% over 2 steps.  $^1\text{H}$  NMR (400 MHz,  $\text{CDCl}_3$ )  $\delta$  8.18 (d,  $J = 8.1$  Hz, 1H), 8.00 (d,  $J = 9.3$  Hz, 1H), 7.69 – 7.58 (m, 2H), 5.77 (ddt,  $J = 17.2, 10.2, 7.0$  Hz, 1H), 5.14 – 5.06 (m, 1H), 5.04 (d,  $J = 10.2$  Hz, 1H), 3.94 (dd,  $J = 8.5, 6.7$  Hz, 2H), 2.60 (s, 3H), 2.49 (q,  $J = 7.2$  Hz, 2H).  $^{13}\text{C}\{^1\text{H}\}$  NMR (101 MHz,  $\text{CDCl}_3$ )  $\delta$  170.4, 164.2, 152.0, 136.6, 134.0, 128.3, 127.8, 125.6, 122.2, 117.7, 46.9, 33.9, 25.5. HR-MS (ESI)  $m/z$ :  $[\text{M}+\text{Na}]^+$  Calcd for  $\text{C}_{13}\text{H}_{14}\text{N}_2\text{O}_3\text{S}_2\text{Na}^+$  333.0338, found: 333.0333. IR  $\nu_{\text{max}}$  (film,  $\text{cm}^{-1}$ ): 2933,



1708, 1470, 1365, 1167, 912, 760, 620.

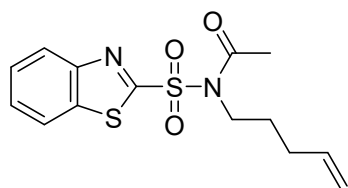

***N*-(benzo[d]thiazol-2-ylsulfonyl)-*N*-(pent-4-en-1-yl)acetamide:** Silica gel column chromatography (petroleum ether/ethyl acetate = 5:1), colorless oil; 324 mg, yield = 50% over 2 steps. <sup>1</sup>H NMR (400 MHz, CDCl<sub>3</sub>) δ 8.23 – 8.13 (m, 1H), 8.04 – 7.96 (m, 1H), 7.71 – 7.50 (m, 2H), 5.80 (ddt, *J* = 16.8, 10.2, 6.5 Hz, 1H), 5.04 (dq, *J* = 17.1, 1.6 Hz, 1H), 4.99 (dq, *J* = 10.2, 1.2 Hz, 1H), 3.93 – 3.78 (m, 2H), 2.59 (s, 3H), 2.11 (q, *J* = 7.4 Hz, 2H), 1.94 – 1.70 (m, 2H). <sup>13</sup>C{<sup>1</sup>H} NMR (101 MHz, CDCl<sub>3</sub>) δ 170.4, 164.3, 152.0, 137.2, 136.6, 128.3, 127.8, 125.6, 122.2, 115.4, 47.4, 30.8, 28.5, 25.5. HR-MS (ESI) *m/z*: [M+Na]<sup>+</sup> Calcd for C<sub>14</sub>H<sub>16</sub>N<sub>2</sub>O<sub>3</sub>S<sub>2</sub>Na<sup>+</sup> 347.0495, found: 347.0487. IR *v*<sub>max</sub> (film, cm<sup>-1</sup>): 2937, 1713, 1473, 1369, 1170, 939, 762, 622.

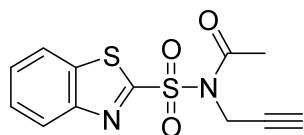

***N*-(benzo[d]thiazol-2-ylsulfonyl)-*N*-(prop-2-yn-1-yl)acetamide (1r):** Silica gel column chromatography (petroleum ether/ethyl acetate = 5:1), white solid; 235 mg, yield = 40% over 2 steps. <sup>1</sup>H NMR (400 MHz, CDCl<sub>3</sub>) δ 8.18 (d, *J* = 7.0 Hz, 1H), 8.00 (d, *J* = 8.0 Hz, 1H), 7.66 – 7.57 (m, 2H), 4.69 (d, *J* = 2.4 Hz, 2H), 2.69 (s, 3H), 2.10 (t, *J* = 2.4 Hz, 1H). <sup>13</sup>C{<sup>1</sup>H} NMR (101 MHz, CDCl<sub>3</sub>) δ 169.7, 163.8, 152.0, 136.7, 128.4, 127.9, 125.6, 122.2, 77.3, 72.6, 36.2, 25.2. HR-MS (ESI) *m/z*: [M+H]<sup>+</sup> Calcd for C<sub>12</sub>H<sub>12</sub>N<sub>2</sub>O<sub>3</sub>S<sub>2</sub>Na<sup>+</sup> 319.0182, found: 319.0180. HR-MS (ESI) *m/z*: [M+Na]<sup>+</sup> Calcd for C<sub>12</sub>H<sub>10</sub>N<sub>2</sub>O<sub>3</sub>S<sub>2</sub>Na<sup>+</sup> 317.0025, found: 317.0019. IR *v*<sub>max</sub> (film, cm<sup>-1</sup>): 3290, 2933, 2111, 1717, 1470, 1369, 1170, 1095, 856, 621.

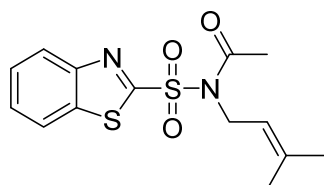

***N*-(benzo[d]thiazol-2-ylsulfonyl)-*N*-(3-methylbut-2-en-1-yl)acetamide (1t):** Silica gel column chromatography (petroleum ether/ethyl acetate = 5:1), colorless oil; 305 mg, yield = 47% over 2 steps. <sup>1</sup>H NMR (400 MHz, CDCl<sub>3</sub>) δ 8.17 (d, *J* = 7.3 Hz, 1H), 7.99 (d, *J* = 8.2 Hz, 1H), 7.66 – 7.55 (m, 2H), 5.20 (ddt, *J* = 6.8, 4.2, 1.3 Hz, 1H), 4.52 (d, *J* = 6.9 Hz, 2H), 2.61 (s, 3H), 1.72 (s, 3H), 1.61 (s, 3H). <sup>13</sup>C{<sup>1</sup>H} NMR (101 MHz, CDCl<sub>3</sub>) δ 170.6, 164.8, 152.0, 137.2, 136.6, 128.2, 127.7, 125.5, 122.1, 119.0, 45.7, 25.6, 25.5, 18.0. HR-MS (ESI) *m/z*: [M+Na]<sup>+</sup> Calcd for C<sub>14</sub>H<sub>16</sub>N<sub>2</sub>O<sub>3</sub>S<sub>2</sub>Na<sup>+</sup> 347.0495, found: 347.0487. IR *v*<sub>max</sub> (film, cm<sup>-1</sup>): 2923, 1711, 1477, 1367, 1167, 950, 762, 623.

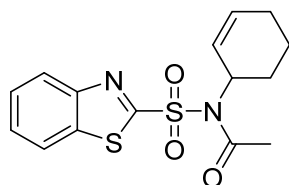

***N*-(benzo[d]thiazol-2-ylsulfonyl)-*N*-(cyclohex-2-en-1-yl)acetamide (1u):** Silica gel column

chromatography (petroleum ether/ethyl acetate = 5:1), colorless oil; 168 mg, yield = 25% over 4 steps.  $^1\text{H}$  NMR (400 MHz, Chloroform-*d*)  $\delta$  8.27 – 8.08 (m, 1H), 8.07 – 7.85 (m, 1H), 7.73 – 7.47 (m, 2H), 5.85 – 5.71 (m, 1H), 5.57 (d,  $J$  = 10.1 Hz, 1H), 5.25 – 5.09 (m, 1H), 2.55 (s, 3H), 2.31 – 2.16 (m, 1H), 2.14 – 1.96 (m, 3H), 1.96 – 1.83 (m, 1H), 1.69 (qdd,  $J$  = 13.8, 5.5, 3.2 Hz, 1H).  $^{13}\text{C}$  NMR (151 MHz, Chloroform-*d*)  $\delta$  170.8, 165.1, 151.9, 136.7, 129.3, 128.2, 127.7, 127.5, 125.5, 122.2, 58.4, 28.2, 26.7, 24.0, 22.6. (ESI)  $m/z$ :  $[\text{M}+\text{Na}]^+$  Calcd for  $\text{C}_{15}\text{H}_{16}\text{N}_2\text{O}_3\text{S}_2^+$  359.0495, found: 359.0488. IR  $\nu_{\text{max}}$  (film,  $\text{cm}^{-1}$ ): 2935, 1712, 1471, 1365, 1170, 970, 761, 647.

#### procedure for substrates 1e

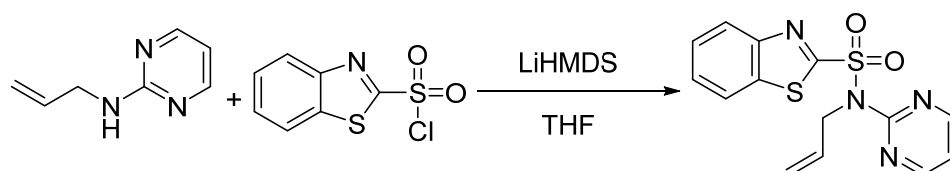

*N*-allylpyrimidin-2-amine was prepared according to previous reports. To a solution of *N*-allylpyrimidin-2-amine (1 equiv.) in THF was added LiHMDS (1.0 M in THF, 1.2 equiv.) in  $-78\text{ }^\circ\text{C}$ . The reaction mixture was allowed to warm to room temperature and stirred for 1 h. The mixture was cooled to  $-78\text{ }^\circ\text{C}$  and a solution of benzo[d]thiazole-2-sulfonyl chloride (1.5 equiv.) in THF was added. The reaction mixture was allowed to warm to room temperature and stirred for 3 h and quenched with saturated  $\text{NH}_4\text{Cl}$  and extracted with ethyl acetate, washed with brine, dried over  $\text{MgSO}_4$ , filtered and evaporated in *vacuo*. The residue was purified by column chromatography.

***N*-allyl-*N*-(pyrimidin-2-yl)benzo[d]thiazole-2-sulfonamide (1e):** Silica gel column chromatography (petroleum ether/ethyl acetate = 5:1), colorless oil; 266 mg, yield = 40% over 2 steps.  $^1\text{H}$  NMR (400 MHz,  $\text{CDCl}_3$ )  $\delta$  8.47 (d,  $J$  = 4.8 Hz, 2H), 8.20 – 8.09 (m, 1H), 8.05 – 7.89 (m, 1H), 7.66 – 7.46 (m, 2H), 6.94 (t,  $J$  = 4.8 Hz, 1H), 6.20 (ddt,  $J$  = 15.8, 10.7, 5.5 Hz, 1H), 5.49 (dd,  $J$  = 17.2, 1.3 Hz, 1H), 5.29 (dd,  $J$  = 10.3, 1.2 Hz, 1H), 5.04 (d,  $J$  = 5.5 Hz, 2H).  $^{13}\text{C}$   $\{^1\text{H}\}$  NMR (101 MHz,  $\text{CDCl}_3$ )  $\delta$  166.5, 157.8, 157.7, 151.7, 137.1, 133.1, 127.6, 127.1, 125.3, 122.0, 118.1, 116.4, 50. HR-MS (ESI)  $m/z$ :  $[\text{M}+\text{H}]^+$  Calcd for  $\text{C}_{14}\text{H}_{13}\text{N}_4\text{O}_2\text{S}_2^+$  333.0474, found: 333.0466. IR  $\nu_{\text{max}}$  (film,  $\text{cm}^{-1}$ ): 2937, 1566, 1402, 1358, 1169, 866, 759, 619.

#### Procedure for substrates 1l

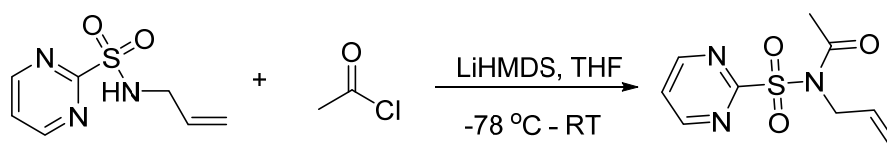

LiHMDS in THF (1.0 M, 1.2 equiv.) was added to a mixture of *N*-allylpyrimidin-2-sulfonamide (1.0 equiv.) in THF carefully at  $-78\text{ }^\circ\text{C}$ . The mixture was stirred at  $-78\text{ }^\circ\text{C}$  for 40 min, treated with acetyl chloride (1.5 equiv.) and then warmed to room temperature. The mixture was stirred for 4 hours and quenched with saturated  $\text{NH}_4\text{Cl}$  and extracted with ethyl acetate, washed with brine, dried over  $\text{MgSO}_4$ , filtered and evaporated in *vacuo*. The residue was purified by column chromatography.

***N*-allyl-*N*-(pyrimidin-2-ylsulfonyl)acetamide (1l):** Silica gel column chromatography (petroleum ether/ethyl acetate = 2:1), yellow oil; 217 mg, yield = 45% over 2 steps.  $^1\text{H}$  NMR (400 MHz,  $\text{CDCl}_3$ )  $\delta$  8.94 (d,  $J$  = 4.9 Hz, 2H), 7.56 (t,  $J$  = 4.9 Hz, 1H), 5.90 (ddt,  $J$  = 16.1, 10.4, 5.8 Hz, 1H), 5.34 – 5.26 (m, 1H), 5.20 – 5.12 (m, 1H), 4.48 (d,  $J$  = 5.8 Hz, 2H), 2.45 (s, 3H).  $^{13}\text{C}$   $\{^1\text{H}\}$  NMR (101 MHz,  $\text{CDCl}_3$ )  $\delta$  171.2, 165.3, 159.0, 132.5, 123.9, 118.5, 49.5, 25.1. HR-MS (ESI)  $m/z$ :  $[\text{M}+\text{Na}]^+$  Calcd for  $\text{C}_9\text{H}_{11}\text{N}_3\text{O}_3\text{SNa}^+$  264.0413, found: 264.0410. IR  $\nu_{\text{max}}$  (film,  $\text{cm}^{-1}$ ): 2930, 1704, 1567, 1361, 1138,

868, 767, 601.

**Procedure for substrates 1u-1w.**<sup>7</sup>

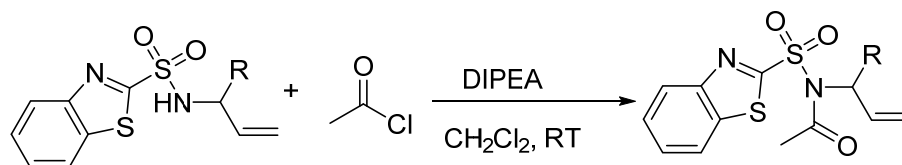

To a solution of *N*-(1-phenylallyl)benzo[d]thiazole-2-sulfonamide (1 equiv.) in dry CH<sub>2</sub>Cl<sub>2</sub> was added diisopropylethylamine (1.2 equiv) at room temperature. After 40 min, acetyl chloride (1.2 equiv) was added dropwise at 0 °C. The mixture was stirred overnight. The resulting mixture was quenched with water. The organic layer was dried Na<sub>2</sub>SO<sub>4</sub>, filtered and evaporated in *vacuo*. The residue was purified by column chromatography.

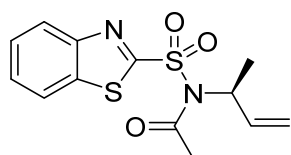

**(S)-*N*-(benzo[d]thiazol-2-ylsulfonyl)-*N*-(but-3-en-2-yl)acetamide (1v):** Silica gel column chromatography (petroleum ether/ethyl acetate = 5:1), colorless oil; 310 mg, yield = 50% over 2 steps, 88:12 er.  $[\alpha]_D^{20.0} = 4.00$  ( $c = 0.3$  in acetone,  $\lambda = 589$  nm). <sup>1</sup>H NMR (400 MHz, CDCl<sub>3</sub>)  $\delta$  8.18 (d,  $J = 7.9$  Hz, 1H), 8.00 (d,  $J = 7.8$  Hz, 1H), 7.62 (dt,  $J = 15.9, 7.3$  Hz, 2H), 6.11 (ddd,  $J = 17.1, 10.1, 5.9$  Hz, 1H), 5.27 – 5.12 (m, 2H), 5.09 (d,  $J = 10.2$  Hz, 1H), 2.59 (s, 3H), 1.58 (d,  $J = 6.8$  Hz, 3H). <sup>13</sup>C{<sup>1</sup>H} NMR (101 MHz, CDCl<sub>3</sub>)  $\delta$  170.6, 164.9, 151.9, 137.5, 136.5, 128.2, 127.8, 125.5, 122.2, 117.0, 58.6, 26.8, 18.8. HR-MS (ESI)  $m/z$ :  $[M+Na]^+$  Calcd for C<sub>13</sub>H<sub>14</sub>N<sub>2</sub>O<sub>3</sub>S<sub>2</sub>Na<sup>+</sup> 333.0338, found: 333.0331. IR  $\nu_{max}$  (film, cm<sup>-1</sup>): 2951, 1710, 1474, 1362, 1167, 947, 760, 618. The enantioselectivity was determined by HPLC (AD-H, n-hexane/*i*-PrOH = 97:3, flow rate: 1.0 mL/min,  $\lambda = 254$  nm),  $t_R$  (major) = 8.4 min,  $t_R$ (minor) = 7.1 min.

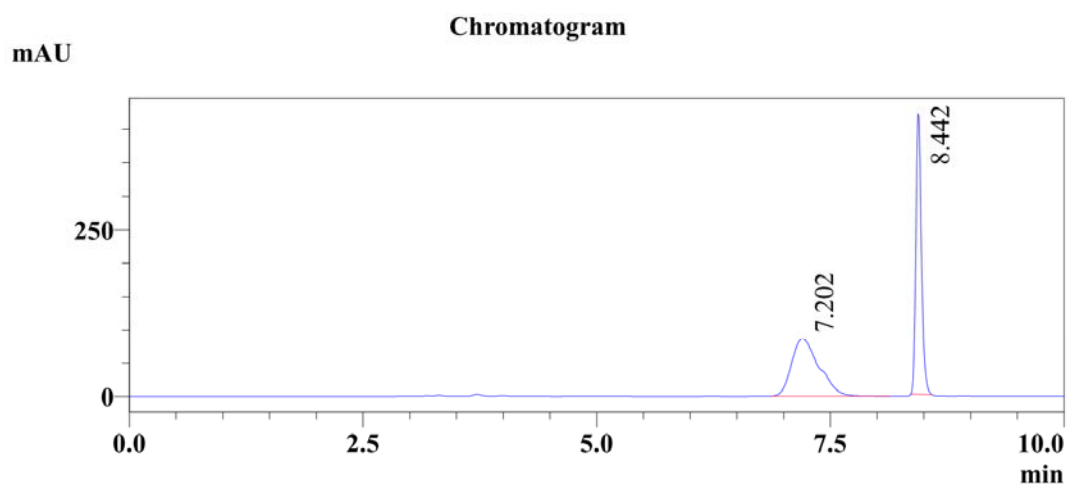

**Peak Table**

| Peak#        | Ret. Time | Height        | Area           | Height%        | Area%          |
|--------------|-----------|---------------|----------------|----------------|----------------|
| 1            | 7.202     | 85957         | 1742645        | 17.002         | 50.101         |
| 2            | 8.442     | 419627        | 1735590        | 82.998         | 49.899         |
| <b>Total</b> |           | <b>505584</b> | <b>3478235</b> | <b>100.000</b> | <b>100.000</b> |

**Figure S1.** Chromatograms of Racemic **1v**

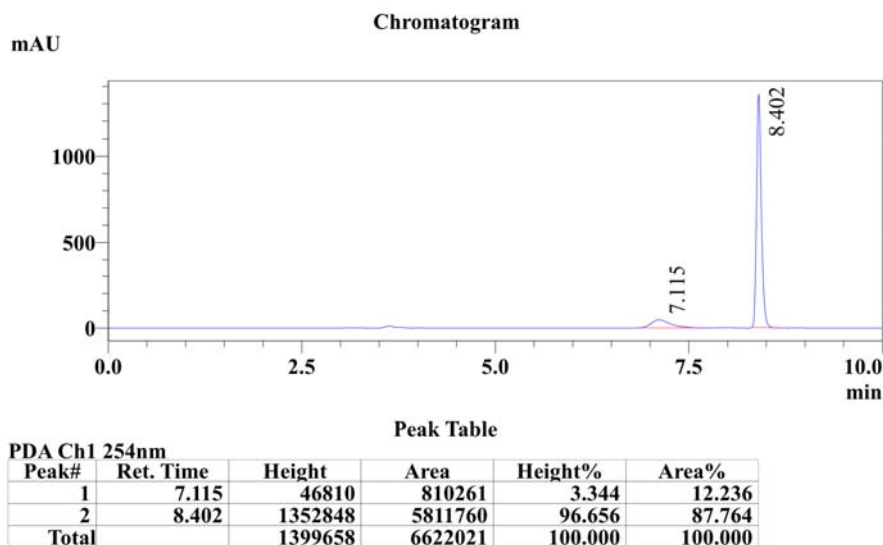

**Figure S2.** Chromatograms of Product **1v**

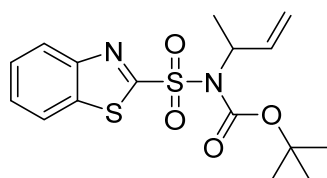

**tert-butyl (benzo[d]thiazol-2-ylsulfonyl)(but-3-en-2-yl)carbamate (1v')**: Using Di-tert-butyl decarbonate instead of Acetyl chloride. Silica gel column chromatography (petroleum ether/ethyl acetate = 5:1), colorless oil; 120 mg, yield = 23% over 5 steps.  $^1\text{H}$  NMR (400 MHz, Chloroform-*d*)  $\delta$  8.22 – 8.13 (m, 1H), 8.03 – 7.92 (m, 1H), 7.65 – 7.52 (m, 2H), 6.21 (ddd,  $J = 17.3, 10.4, 5.5$  Hz, 1H), 5.36 – 5.29 (m, 1H), 5.29 – 5.18 (m, 2H), 1.68 (d,  $J = 6.9$  Hz, 3H), 1.34 (s, 9H).  $^{13}\text{C}$  NMR (151 MHz, Chloroform-*d*)  $\delta$  165.6, 151.8, 150.0, 138.1, 136.7, 127.8, 127.4, 125.3, 122.1, 116.5, 85.5, 57.7, 27.9, 18.9. HR-MS (ESI)  $m/z$ :  $[\text{M}+\text{Na}]^+$  Calcd for  $\text{C}_{16}\text{H}_{20}\text{N}_2\text{O}_4\text{S}_2\text{Na}^+$  391.0757, found: 391.0750. IR  $\nu_{\text{max}}$  (film,  $\text{cm}^{-1}$ ): 2934, 1736, 1457, 1364, 1145, 1023, 761, 632.

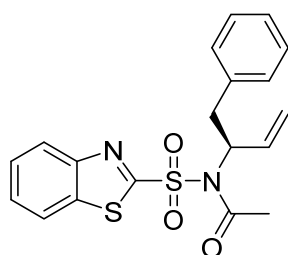

**(S)-N-(benzo[d]thiazol-2-ylsulfonyl)-N-(1-phenylbut-3-en-2-yl)acetamide (1w)**: Silica gel column chromatography (petroleum ether/ethyl acetate = 5:1), colorless oil; 386 mg, yield = 50% over 2 steps, 90:10 er.  $[\alpha]_{\text{D}}^{20.0} = -12.00$  ( $c = 0.3$  in acetone,  $\lambda = 589$  nm).  $^1\text{H}$  NMR (400 MHz,  $\text{CDCl}_3$ )  $\delta$  8.17 – 8.06 (m, 1H), 7.99 – 7.85 (m, 1H), 7.73 – 7.51 (m, 2H), 7.14 – 7.01 (m, 4H), 7.01 – 6.87 (m, 1H), 6.23 (ddd,  $J = 17.3, 10.3, 7.1$  Hz, 1H), 5.27 – 4.99 (m, 3H), 3.34 (dd,  $J = 13.6, 7.6$  Hz, 1H), 3.21 (dd,  $J = 13.6, 7.8$  Hz, 1H), 2.65 (s, 3H).  $^{13}\text{C}\{^1\text{H}\}$  NMR (101 MHz,  $\text{CDCl}_3$ )  $\delta$  171.0, 164.4, 152.1, 137.6, 136.6, 135.6, 129.3, 128.3, 128.2, 127.7, 126.5, 125.6, 122.1, 118.8, 65.1, 39.1, 27.0. HR-MS (ESI)  $m/z$ :  $[\text{M}+\text{H}]^+$  Calcd for  $\text{C}_{19}\text{H}_{19}\text{N}_2\text{O}_3\text{S}_2^+$  387.0832, found: 387.0821. IR  $\nu_{\text{max}}$  (film,  $\text{cm}^{-1}$ ):

<sup>-1</sup>): 2927, 1709, 1474, 1366, 1165, 918, 760, 623. The enantioselectivity was determined by UPCC (Chiralpak AD-3, gradient 100% CO<sub>2</sub> to CO<sub>2</sub>/MeOH = 90:10 in 0-15<sup>th</sup> min, flow rate: 0.5 mL/min, λ = 254 nm), t<sub>R</sub> (major) = 13.9 min, t<sub>R</sub>(minor) = 13.2 min.

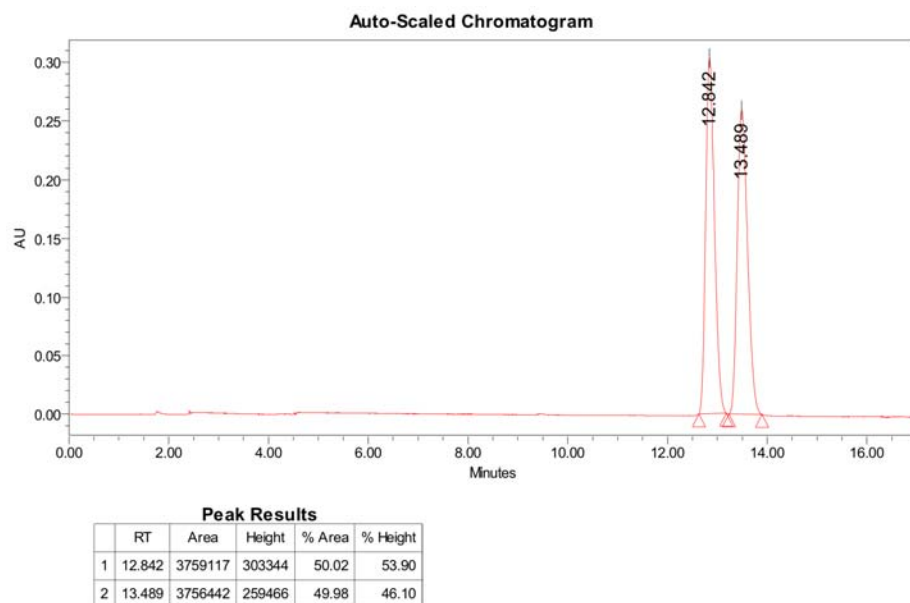

**Figure S3.** Chromatograms of Racemic **1w**

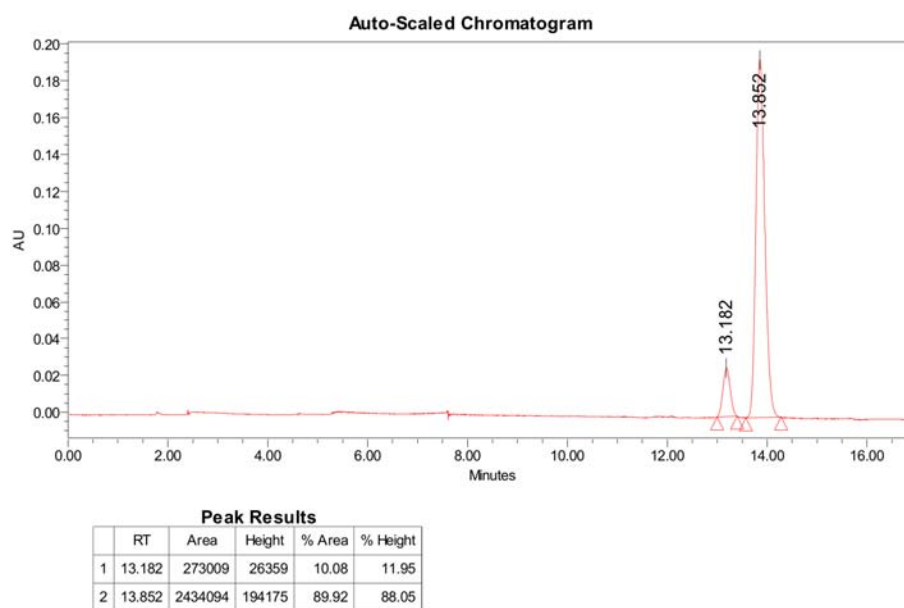

**Figure S4.** Chromatograms of Product **1w**

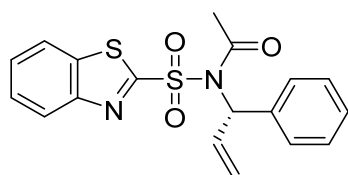

**(S)-N-(benzo[d]thiazol-2-ylsulfonyl)-N-(1-phenylallyl)acetamide (1x):** Silica gel column chromatography (petroleum ether/ethyl acetate = 5:1), colorless oil; 120 mg, yield = 23% over 5 steps, 98:2 er.  $[\alpha]_D^{20.0} = -50.67$  ( $c = 0.3$  in acetone,  $\lambda = 589$  nm). <sup>1</sup>H NMR (400 MHz, CDCl<sub>3</sub>) δ 8.21

(d,  $J = 8.0$  Hz, 1H), 7.98 (d,  $J = 7.9$  Hz, 1H), 7.64 (dt,  $J = 20.3, 7.3$  Hz, 2H), 7.38 (d,  $J = 6.7$  Hz, 2H), 7.24 (d,  $J = 7.2$  Hz, 3H), 6.54 (dt,  $J = 17.3, 8.9$  Hz, 1H), 6.34 (d,  $J = 7.4$  Hz, 1H), 5.44 – 5.32 (m, 2H), 2.62 (s, 3H).  $^{13}\text{C}\{^1\text{H}\}$  NMR (101 MHz,  $\text{CDCl}_3$ )  $\delta$  170.8, 165.2, 152.0, 138.3, 136.8, 134.2, 128.4, 128.3, 127.8, 127.7, 127.5, 125.6, 122.3, 120.7, 64.5, 26.7. HR-MS (ESI)  $m/z$ :  $[\text{M}+\text{H}]^+$  Calcd for  $\text{C}_{12}\text{H}_{12}\text{N}_2\text{O}_3\text{S}_2\text{Na}^+$  319.0182, found: 319.0180. HR-MS (ESI)  $m/z$ :  $[\text{M}+\text{Na}]^+$  Calcd for  $\text{C}_{18}\text{H}_{16}\text{N}_2\text{O}_3\text{S}_2\text{Na}^+$  395.0495, found: 395.0489. IR  $\nu_{\text{max}}$  (film,  $\text{cm}^{-1}$ ): 2937, 1706, 1474, 1365, 1167, 929, 760, 632. The enantioselectivity was determined by UPCC (Chiralpak AD-3, gradient 100%  $\text{CO}_2$  to  $\text{CO}_2/\text{MeOH} = 90:10$  in 0-20<sup>th</sup> min, flow rate: 0.5 mL/min,  $\lambda = 254$  nm),  $t_{\text{R}}$  (major) = 13.9 min,  $t_{\text{R}}$ (minor) = 13.2 min.

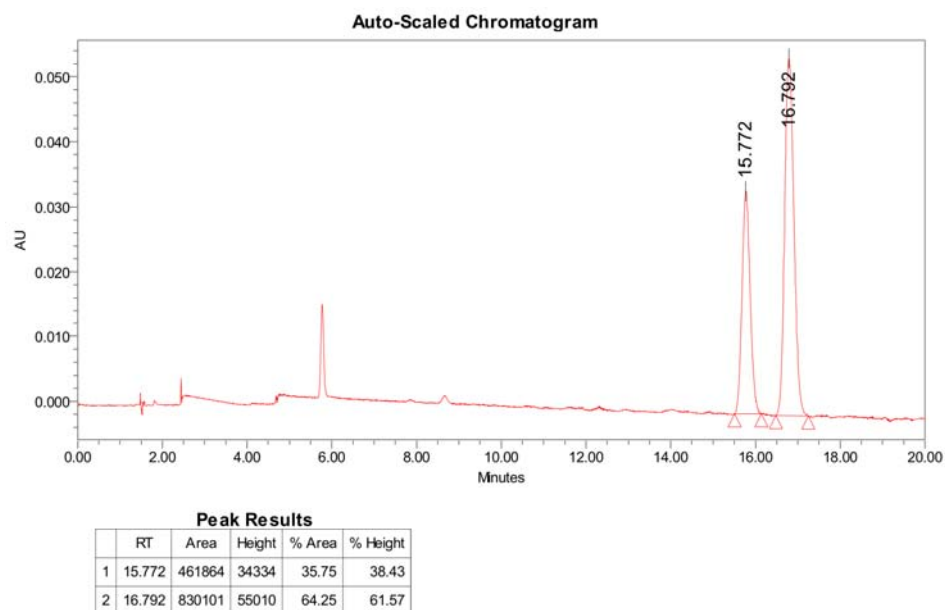

**Figure S5.** Chromatograms of Racemic **1x**

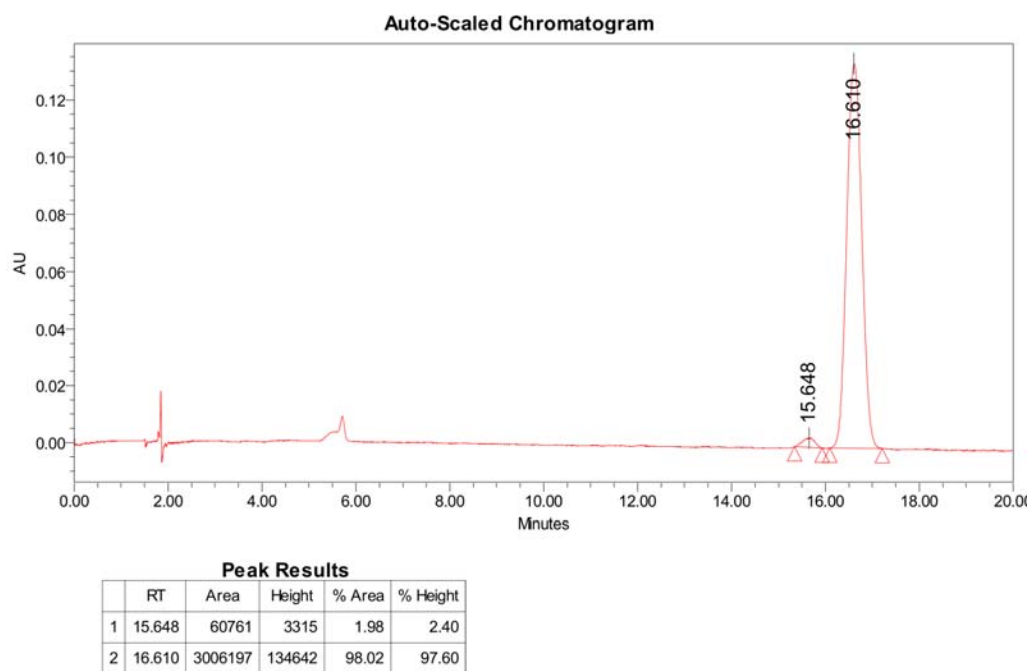

**Figure S6.** Chromatograms of Product **1x**

### General procedure for substrates 3x to 3z5.<sup>8</sup>

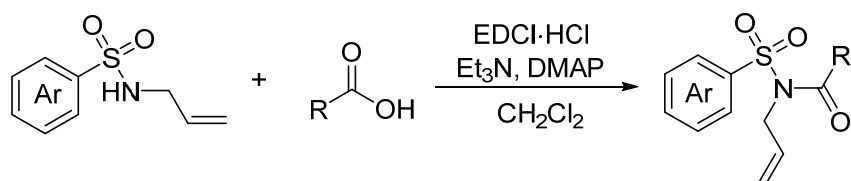

*N*-allyl arylsulfonamide was prepared according to above procedure. To a solution of *N*-allyl arylsulfonamide (1.0 equiv.) was added 1-ethyl-3-(3-dimethylaminopropyl)carbodiimide hydrochloride (1.5 equiv), Et<sub>3</sub>N (2.0 equiv.) and DMAP (1.2 equiv.) in dry CH<sub>2</sub>Cl<sub>2</sub>. The corresponding acid (1.2 equiv.) was added at 0 °C. The mixture was stirred for overnight at room temperature. The resulting mixture was washed by 1N HCl (2 x 20 mL), 1N NaOH (2 x 20 mL), and water (1 x 20 mL). The organic layer was dried Na<sub>2</sub>SO<sub>4</sub>, filtered and evaporated in *vacuo*. The residue was purified by column chromatography.

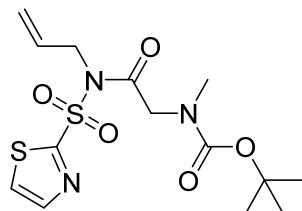

**tert-butyl (2-(*N*-allylthiazole-2-sulfonamido)-2-oxoethyl)(methyl)carbamate (1y):** Silica gel column chromatography (petroleum ether/ethyl acetate = 3:1), white solid; 330 mg, yield = 44% over 2 steps. <sup>1</sup>H NMR (400 MHz, CDCl<sub>3</sub>) δ 8.02 (d, *J* = 2.9 Hz, 0.4H), 8.00 (d, *J* = 3.0 Hz, 0.6H), 7.76 (d, *J* = 3.0 Hz, 0.6H), 7.74 (d, *J* = 3.0 Hz, 0.4H), 5.80 (ddq, *J* = 16.2, 10.7, 5.6 Hz, 1H), 5.26 (d, *J* = 17.1 Hz, 1H), 5.16 (dd, *J* = 10.2, 3.9 Hz, 1H), 4.64 (d, *J* = 23.9 Hz, 2H), 4.46 (d, *J* = 5.8 Hz, 2H), 2.91 (s, 1.8H), 2.89 (s, 1.2H), 1.46 (s, 3.6H), 1.35 (s, 5.4H). <sup>13</sup>C {<sup>1</sup>H} NMR (101 MHz, CDCl<sub>3</sub>) δ 169.7, 169.6, 163.9, 163.8, 156.2, 155.7, 144.8, 144.7, 131.6, 131.5, 126.2, 126.1, 119.0, 118.9, 80.1, 80.0, 54.3, 53.5, 49.5, 49.3, 35.6, 28.3, 28.2. HR-MS (ESI) *m/z*: [M+Na]<sup>+</sup> Calcd for C<sub>14</sub>H<sub>21</sub>N<sub>3</sub>O<sub>5</sub>S<sub>2</sub>Na<sup>+</sup> 398.0815, found: 398.0811. IR *v*<sub>max</sub> (film, cm<sup>-1</sup>): 2983, 1717, 1695, 1478, 1366, 1145, 1059, 761, 602.

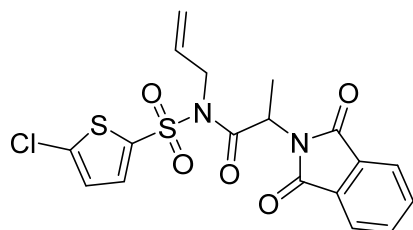

***N*-allyl-*N*-((5-chlorothiophen-2-yl)sulfonyl)-2-(1,3-dioxisoindolin-2-yl)propanamide (1z):** Silica gel column chromatography (petroleum ether/ethyl acetate = 6:1), white solid; 385 mg, yield = 44% over 2 steps. <sup>1</sup>H NMR (400 MHz, CDCl<sub>3</sub>) δ 7.86 (dd, *J* = 5.5, 3.0 Hz, 2H), 7.76 (dd, *J* = 5.3, 3.1 Hz, 2H), 7.67 (d, *J* = 4.1 Hz, 1H), 6.92 (d, *J* = 4.1 Hz, 1H), 5.80 (ddt, *J* = 15.9, 10.5, 5.4 Hz, 1H), 5.46 (q, *J* = 7.1 Hz, 1H), 5.23 (d, *J* = 17.2 Hz, 1H), 5.13 (d, *J* = 10.4 Hz, 1H), 4.37 (t, *J* = 4.8 Hz, 2H), 1.76 (d, *J* = 7.1 Hz, 3H). <sup>13</sup>C {<sup>1</sup>H} NMR (101 MHz, CDCl<sub>3</sub>) δ 170.4, 167.3, 139.7, 136.5, 134.6, 134.3, 131.8, 131.7, 126.7, 123.6, 118.7, 49.9, 49.5, 15.9. HR-MS (ESI) *m/z*: [M+H]<sup>+</sup> Calcd

for  $C_{18}H_{16}ClN_2O_5S_2^+$  439.0184, found: 439.0179. IR  $\nu_{max}$  (film,  $cm^{-1}$ ): 2961, 1780, 1713, 1405, 1365, 1167, 994, 882, 717, 602.

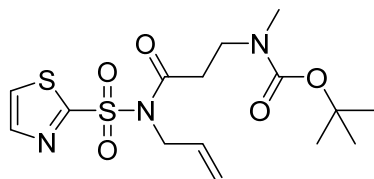

**tert-butyl (3-(*N*-allylthiazole-2-sulfonamido)-3-oxopropyl)(methyl)carbamate (1z1):** Silica gel column chromatography (petroleum ether/ethyl acetate = 3:1), colorless oil; 335 mg, yield = 43% over 2 steps.  $^1H$  NMR (400 MHz,  $CDCl_3$ )  $\delta$  7.97 (d,  $J$  = 3.0 Hz, 1H), 7.71 (d,  $J$  = 3.0 Hz, 1H), 5.84 (s, 1H), 5.26 (d,  $J$  = 17.1 Hz, 1H), 5.18 (d,  $J$  = 10.3 Hz, 1H), 4.51 – 4.45 (m, 2H), 3.51 (t,  $J$  = 6.9 Hz, 2H), 3.14 (s, 2H), 2.83 (s, 3H), 1.43 (s, 9H).  $^{13}C\{^1H\}$  NMR (101 MHz,  $CDCl_3$ )  $\delta$  171.8, 164.3, 155.6, 144.6, 132.1, 126.1, 118.7, 79.8, 49.4, 45.0, 35.7, 35.2, 28.5. HR-MS (ESI)  $m/z$ :  $[M+Na]^+$  Calcd for  $C_{15}H_{23}N_3O_5S_2Na^+$  412.0971, found: 412.0964. IR  $\nu_{max}$  (film,  $cm^{-1}$ ): 2947, 1738, 1728, 1435, 1365, 1143, 762, 603.

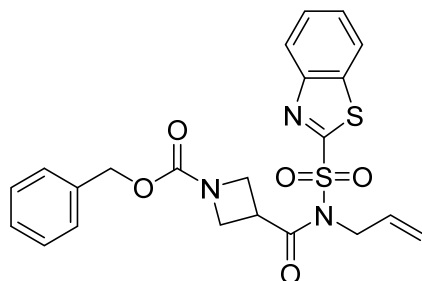

**benzyl 3-(allyl(benzo[*d*]thiazol-2-ylsulfonyl)carbamoyl)azetidine-1-carboxylate (1z2):** Silica gel column chromatography (petroleum ether/ethyl acetate = 5:1), colorless oil; 415 mg, yield = 44% over 2 steps.  $^1H$  NMR (400 MHz,  $CDCl_3$ )  $\delta$  8.16 (d,  $J$  = 8.2 Hz, 1H), 8.00 (d,  $J$  = 7.8 Hz, 1H), 7.64 (p,  $J$  = 7.2 Hz, 2H), 7.48 – 7.29 (m, 5H), 5.82 (ddt,  $J$  = 16.4, 11.5, 5.9 Hz, 1H), 5.29 (d,  $J$  = 17.1 Hz, 1H), 5.16 (d,  $J$  = 10.2 Hz, 1H), 5.10 (s, 2H), 4.47 (d,  $J$  = 5.9 Hz, 2H), 4.41 (ddd,  $J$  = 14.3, 8.7, 5.8 Hz, 1H), 4.36 – 4.29 (m, 2H), 4.23 (t,  $J$  = 8.7 Hz, 2H).  $^{13}C\{^1H\}$  NMR (101 MHz,  $CDCl_3$ )  $\delta$  171.8, 163.9, 156.2, 151.9, 136.6, 136.5, 131.4, 128.5, 128.1, 128.0, 125.6, 122.3, 119.4, 66.8, 51.7, 49.6, 35.1. HR-MS (ESI)  $m/z$ :  $[M+H]^+$  Calcd for  $C_{22}H_{22}N_3O_5S_2^+$  472.0995, found: 472.0989. IR  $\nu_{max}$  (film,  $cm^{-1}$ ): 2902, 1702, 1420, 1346, 1125, 1026, 760, 621.

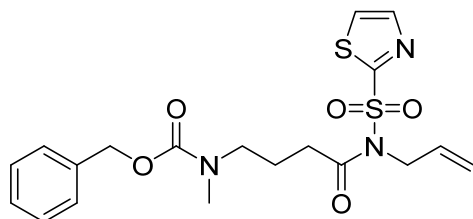

**benzyl (4-(*N*-allylthiazole-2-sulfonamido)-4-oxobutyl)(methyl)carbamate (1z3):** Silica gel column chromatography (petroleum ether/ethyl acetate = 3:1), colorless oil; 376 mg, yield = 43% over 2 steps.  $^1H$  NMR (400 MHz,  $CDCl_3$ )  $\delta$  7.94 (d,  $J$  = 3.1 Hz, 1H), 7.67 (s, 1H), 7.37 – 7.29 (m, 5H), 5.83 (s, 1H), 5.29 – 5.14 (m, 2H), 5.09 (s, 2H), 4.43 (d,  $J$  = 29.2 Hz, 2H), 3.31 (t,  $J$  = 7.0 Hz, 2H), 2.89 (s, 5H), 1.88 (q,  $J$  = 7.0 Hz, 2H).  $^{13}C\{^1H\}$  NMR (101 MHz,  $CDCl_3$ )  $\delta$  172.6, 164.3, 156.3, 144.5, 136.9, 132.2, 128.5, 128.0, 127.8, 125.9, 118.5, 67.1, 49.3, 48.1, 47.6, 33.5, 22.8. HR-MS



(ESI)  $m/z$ :  $[M+H]^+$  Calcd for  $C_{19}H_{23}N_3O_5S_2^+$  438.1152, found: 438.1147. IR  $\nu_{max}$  (film,  $cm^{-1}$ ): 2947, 1740, 1695, 1408, 1365, 1183, 1027, 886, 743.

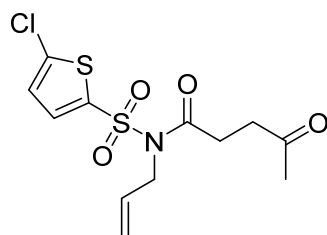

***N*-allyl-*N*-((5-chlorothiophen-2-yl)sulfonyl)-4-oxopentanamide (1z4)**: Silica gel column chromatography (petroleum ether/ethyl acetate = 10:1), colorless oil; 302 mg, yield = 45% over 2 steps.  $^1H$  NMR (400 MHz,  $CDCl_3$ )  $\delta$  7.61 (d,  $J$  = 4.1 Hz, 1H), 6.94 (d,  $J$  = 4.1 Hz, 1H), 5.86 (ddt,  $J$  = 15.8, 10.5, 5.4 Hz, 1H), 5.34 – 5.17 (m, 2H), 4.45 (d,  $J$  = 5.3 Hz, 2H), 2.88 (t,  $J$  = 6.0 Hz, 2H), 2.78 (t,  $J$  = 6.1 Hz, 2H), 2.18 (s, 3H).  $^{13}C\{^1H\}$  NMR (101 MHz,  $CDCl_3$ )  $\delta$  206.5, 172.0, 139.5, 138.3, 137.3, 134.0, 132.1, 126.5, 118.5, 49.0, 37.5, 30.2, 29.8. HR-MS (ESI)  $m/z$ :  $[M+Na]^+$  Calcd for  $C_{12}H_{14}ClNO_4S_2Na^+$  357.9945, found: 357.9941. IR  $\nu_{max}$  (film,  $cm^{-1}$ ): 2923, 1743, 1702, 1405, 1360, 1164, 993, 800, 614.

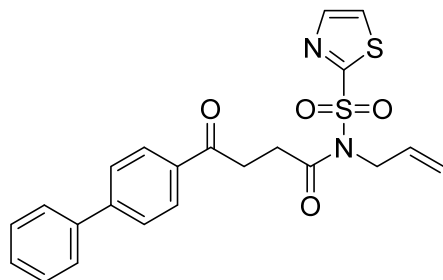

**4-([1,1'-biphenyl]-4-yl)-*N*-allyl-4-oxo-*N*-(thiazol-2-ylsulfonyl)butanamide (1z5)**: Silica gel column chromatography (petroleum ether/ethyl acetate = 3:1), red solid; 414 mg, yield = 47% over 2 steps.  $^1H$  NMR (400 MHz,  $CDCl_3$ )  $\delta$  8.02 (dd,  $J$  = 5.7, 2.5 Hz, 3H), 7.72 (d,  $J$  = 3.1 Hz, 1H), 7.67 (d,  $J$  = 8.3 Hz, 2H), 7.62 (d,  $J$  = 7.4 Hz, 2H), 7.47 (t,  $J$  = 7.5 Hz, 2H), 7.40 (t,  $J$  = 7.3 Hz, 1H), 5.92 (ddt,  $J$  = 16.0, 10.8, 5.6 Hz, 1H), 5.34 (d,  $J$  = 17.2 Hz, 1H), 5.23 (d,  $J$  = 10.3 Hz, 1H), 4.57 (d,  $J$  = 5.6 Hz, 2H), 3.35 (q,  $J$  = 3.1 Hz, 4H).  $^{13}C\{^1H\}$  NMR (101 MHz,  $CDCl_3$ )  $\delta$  197.3, 172.5, 145.9, 144.5, 139.9, 135.2, 132.2, 129.0, 128.6, 128.3, 127.3, 127.2, 126.0, 118.5, 49.6, 33.2, 30.9. HR-MS (ESI)  $m/z$ :  $[M+H]^+$  Calcd for  $C_{22}H_{21}N_2O_4S_2^+$  441.0937, found: 441.0931. IR  $\nu_{max}$  (film,  $cm^{-1}$ ): 2930, 1710, 1680, 1503, 1361, 1181, 988, 843, 762, 599.

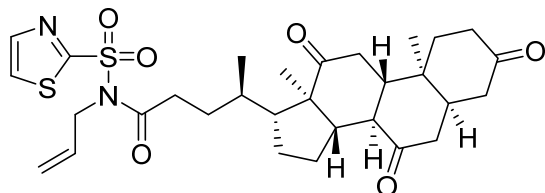

**(*R*)-*N*-allyl-4-((5*S*,8*R*,9*S*,10*S*,13*R*,14*S*,17*R*)-10,13-dimethyl-3,7,12-trioxohexadecahydro-1*H*-cyclopenta[*a*]phenanthren-17-yl)-*N*-(thiazol-2-ylsulfonyl)pentanamide (1z6)**: Silica gel column chromatography (petroleum ether/ethyl acetate = 3:1), white solid; 470 mg, yield = 40% over 2 steps.  $^1H$  NMR (400 MHz,  $CDCl_3$ )  $\delta$  7.95 (d,  $J$  = 2.9 Hz, 1H), 7.71 (d,  $J$  = 2.9 Hz, 1H), 5.85 (ddt,  $J$  = 15.9, 10.6, 5.5 Hz, 1H), 5.25 (d,  $J$  = 17.1 Hz, 1H), 5.16 (d,  $J$  = 10.2 Hz, 1H), 4.47 (d,  $J$  = 5.2 Hz, 2H), 2.94 – 2.82 (m, 3H), 2.77 (dd,  $J$  = 22.5, 10.6 Hz, 2H), 2.34 – 2.08 (m, 8H), 2.02 – 1.90 (m, 4H), 1.80 (q,  $J$  = 11.2 Hz, 3H), 1.62 (d,  $J$  = 4.5 Hz, 1H), 1.36 (s, 3H), 1.32 – 1.20 (m, 3H), 1.02 (s, 3H),

0.77 (d,  $J = 6.4$  Hz, 3H).  $^{13}\text{C}\{^1\text{H}\}$  NMR (101 MHz,  $\text{CDCl}_3$ )  $\delta$  211.9, 209.0, 208.7, 173.5, 164.4, 144.4, 132.4, 126.0, 118.3, 56.9, 51.7, 49.3, 49.0, 46.8, 45.7, 45.5, 45.0, 42.8, 38.6, 36.5, 36.0, 35.2, 33.7, 30.1, 27.5, 25.1, 21.9, 18.8, 11.8. HR-MS (ESI)  $m/z$ :  $[\text{M}+\text{H}]^+$  Calcd for  $\text{C}_{30}\text{H}_{41}\text{N}_2\text{O}_6\text{S}_2^+$  589.2328, found: 589.2392. IR  $\nu_{\text{max}}$  (film,  $\text{cm}^{-1}$ ): 2942, 1735, 1705, 1444, 1369, 1243, 1140, 1045, 861, 604, 571.

### 3. Table S1. Optimization of reaction conditions<sup>a</sup>

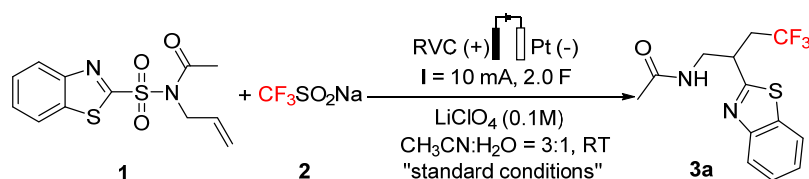

| entry | changed from the standard conditions                       | yield <sup>b</sup> (%) |
|-------|------------------------------------------------------------|------------------------|
| 1     | None                                                       | 86 (82)                |
| 2     | $^n\text{Bu}_4\text{NBF}_4$ as the electrolyte             | 66                     |
| 3     | $\text{NaClO}_4$ as the electrolyte                        | 80                     |
| 4     | $\text{LiBF}_4$ as the electrolyte                         | 74                     |
| 5     | No $\text{H}_2\text{O}$                                    | 32                     |
| 6     | $\text{CH}_3\text{CN}/\text{H}_2\text{O}$ (5:1) as solvent | 63                     |
| 7     | $\text{CH}_3\text{CN}/\text{H}_2\text{O}$ (1:1) as solvent | 78                     |
| 8     | THF instead of $\text{CH}_3\text{CN}$                      | 0                      |
| 9     | Acetone instead of $\text{CH}_3\text{CN}$                  | 75                     |
| 10    | 5 mA                                                       | 71                     |
| 11    | 15 mA                                                      | 63                     |
| 12    | Graphite rods as anode                                     | 20                     |
| 13    | Carbon felt as anode                                       | Trace                  |
| 14    | Pt as anode                                                | 15                     |
| 15    | RVC as cathode                                             | 77                     |
| 16    | Under $\text{N}_2$                                         | 84                     |
| 17    | No electricity                                             | 0                      |

[a] reaction conditions: RVC anode (100 PPI,  $0.8\text{ cm} \times 0.8\text{ cm} \times 1.0\text{ cm}$ ), Pt cathode ( $1.0\text{ cm} \times 1.0\text{ cm}$ ), **1** (0.2 mmol), **2** (0.4 mmol), 0.1 M  $\text{LiClO}_4$  in  $\text{CH}_3\text{CN}:\text{H}_2\text{O}$  (6 mL,  $v/v = 3:1$ ) under air at room temperature, 10 mA ( $j_{\text{anode}} \approx 0.25\text{ mA cm}^{-2}$ ), 2.0 F/mol, undivided cell. [b] Yield determined by  $^{19}\text{F}$  NMR spectroscopy using  $\text{PhOCF}_3$  as an internal standard. isolated yields in parentheses.

#### 4. General procedure of the electrolysis

To the 10 mL three-necked round bottom flask with a magnetic stir bar was added the *N*-allylsulfonamide (0.2 mmol), CF<sub>3</sub>SO<sub>2</sub>Na (62.4 mg, 0.4 mmol, 2.0 equiv.), LiClO<sub>4</sub> (63.6 mg, 0.1 M.) and CH<sub>3</sub>CN : H<sub>2</sub>O (3:1 v/v, 6.0 mL). The flask was equipped with a reticulated vitreous carbon (100 PPI) anode (0.8 cm x 0.8 cm x 1 cm) and a platinum plate (1 cm x 1cm) cathode. The electrolysis was carried out at rt using a constant current of 10 mA. The reaction mixture was stirred and electrolyzed for 1.08 h (2.0 F per mol of sulfonamide). When the reaction was finished, the reaction was quenched with saturated NaCl aqueous solution and extracted three times with ethyl acetate. The combined organic layers were dried over Na<sub>2</sub>SO<sub>4</sub> and concentrated in *vacuo*. The crude mixture was purified via silica gel column chromatography or preparative TLC (25 % acetone/ petroleum ether) to afford the desired product.

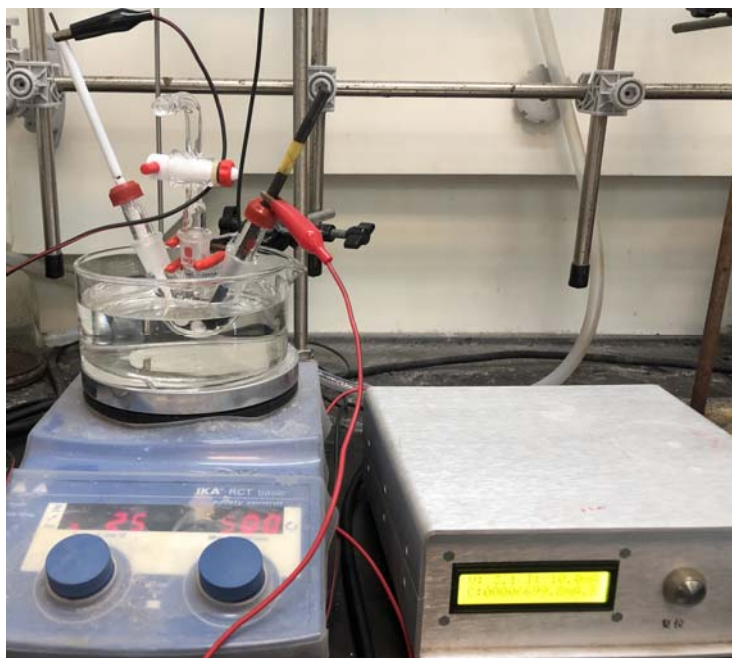

#### Procedure for gram-scale experiment

To the 50 mL three-necked round bottom flask with a magnetic stir bar was added the *N*-allyl-*N*-(benzo[d]thiazol-2-ylsulfonyl)acetamide (2 mmol, 592 mg), CF<sub>3</sub>SO<sub>2</sub>Na (624 mg, 4 mmol, 2.0 equiv.), LiClO<sub>4</sub> (318 mg, 0.1 M.) and CH<sub>3</sub>CN:H<sub>2</sub>O (3:1 v/v, 30 mL). The flask was equipped with a reticulated vitreous carbon (100 PPI) anode (0.8 cm x 0.8 cm x 1 cm) and a platinum plate (1 cm x 1cm) cathode. The electrolysis was carried out at rt using a constant current of 10 mA. The reaction mixture was stirred and electrolyzed for 11 h (2.0 F per mol of sulfonamide). When the reaction was finished, the reaction was quenched with saturated NaCl aqueous solution and extracted three times with ethyl acetate. The combined organic layers were dried over Na<sub>2</sub>SO<sub>4</sub> and concentrated in *vacuo*. The crude mixture was purified via silica gel column chromatography or preparative TLC (25 % acetone/ petroleum ether) to afford the desired product. Colorless oil was obtained in 70% isolated yield for *N*-(2-(benzo[d]thiazol-2-yl)-4,4,4-trifluorobutyl)acetamide.

The detection of sulfates was performed via Metrohm 882 ionic chromatography.

Column: Metrosep A supp 4 250/4.05.2;

Eluent: 1.8 mmol/L Na<sub>2</sub>CO<sub>3</sub> + 1.7 mmol/L NaHCO<sub>3</sub>;

Flow rate: 1.0 mL/min;

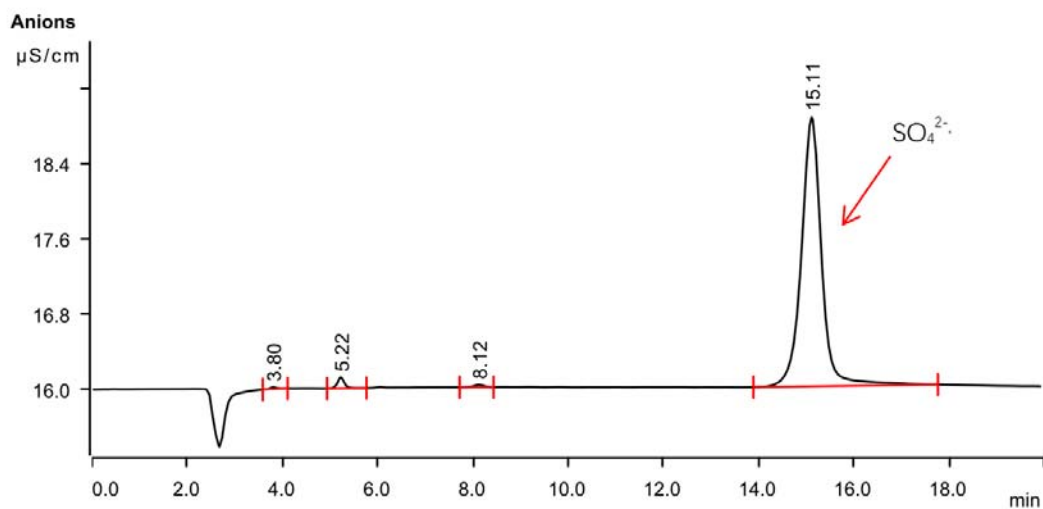

Figure S7. Standard sulfate solution

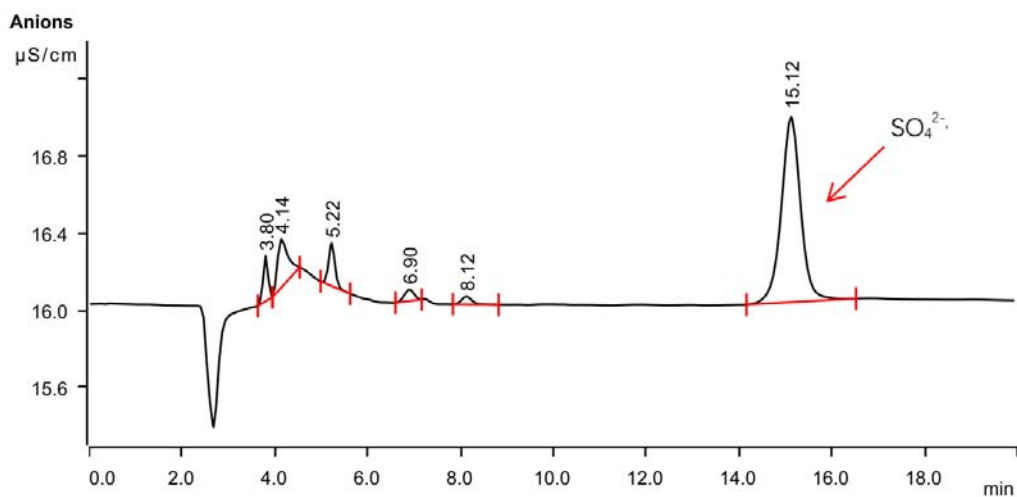

Figure S8. reaction mixture

## 5. Table S2. Functional group compatibility

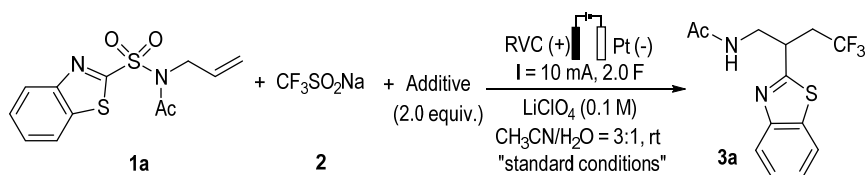

| Entry | Additive | Product yield | Additive | SM remaining |
|-------|----------|---------------|----------|--------------|
|-------|----------|---------------|----------|--------------|

|   |                                                                                     | (%) <sup>a</sup> | remaining (%) <sup>a</sup> | (%) <sup>b</sup> |
|---|-------------------------------------------------------------------------------------|------------------|----------------------------|------------------|
| 1 | 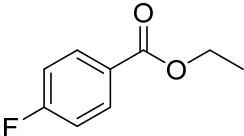   | 86               | 98                         | <5               |
| 2 |    | 86               | 98                         | <5               |
| 3 |    | 83               | 95                         | <5               |
| 4 |    | 84               | 44                         | <5               |
| 5 |   | 86               | 84                         | <5               |
| 6 |  | 76               | 64                         | 18               |
| 7 |  | 30               | 12 <sup>c</sup>            | 63               |

<sup>a</sup> Yield determined by <sup>19</sup>F NMR spectroscopy using PhOCF<sub>3</sub> as an internal standard. <sup>b</sup> Yield determined by <sup>19</sup>F NMR spectroscopy using 4-Fluoroacetophenone as an internal standard. <sup>c</sup>determined by GC-MS.

## 6. Characterization data of electrolysis products

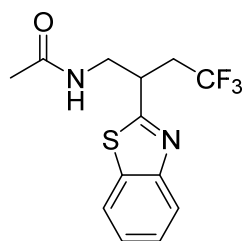

***N*-(2-(benzo[d]thiazol-2-yl)-4,4,4-trifluorobutyl)acetamide (3a)**: Silica gel column chromatography (petroleum ether/acetone = 4:1), colorless oil; 300 mg, yield = 82%;  $^1\text{H}$  NMR (400 MHz,  $\text{CDCl}_3$ )  $\delta$  7.99 (d,  $J$  = 8.1 Hz, 1H), 7.87 (d,  $J$  = 8.0 Hz, 1H), 7.49 (t,  $J$  = 7.7 Hz, 1H), 7.40 (t,  $J$  = 7.6 Hz, 1H), 6.25 (s, 1H), 3.72 (m, 2H), 2.89 (m, 1H), 2.75 – 2.45 (m, 1H), 1.94 (s, 3H);  $^{13}\text{C}\{^1\text{H}\}$  NMR (101 MHz,  $\text{CDCl}_3$ )  $\delta$  170.6, 170.5, 153.0, 134.7, 126.4, 126.1 (q,  $J$  = 275 Hz), 125.4, 123.0, 121.8, 43.4, 38.2 (q,  $J$  = 2.6 Hz), 36.7 (q,  $J$  = 29.0 Hz), 23.2;  $^{19}\text{F}$  NMR (376 MHz,  $\text{CDCl}_3$ )  $\delta$  -64.08. HR-MS (ESI)  $m/z$ :  $[\text{M}+\text{H}]^+$  Calcd for  $\text{C}_{13}\text{H}_{14}\text{F}_3\text{N}_2\text{OS}^+$  303.0773, found: 303.0771. IR  $\nu_{\text{max}}$  (film,  $\text{cm}^{-1}$ ): 3230, 2931, 1653, 1548, 1405, 1255, 1126, 758, 600.

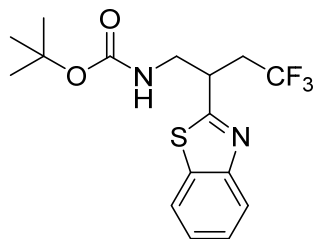

**tert-butyl (2-(benzo[d]thiazol-2-yl)-4,4,4-trifluorobutyl)carbamate (3b)**: Silica gel column chromatography (petroleum ether/acetone = 4:1), colorless oil; 43.9 mg, yield = 61%;  $^1\text{H}$  NMR (400 MHz,  $\text{CDCl}_3$ )  $\delta$  8.00 (d,  $J$  = 8.1 Hz, 1H), 7.87 (d,  $J$  = 8.0 Hz, 1H), 7.54 – 7.45 (m, 1H), 7.45 – 7.36 (m, 1H), 4.96 (s, 1H), 3.75 (m, 1H), 3.63 (m, 2H), 2.91 (m, 1H), 2.64 (m, 1H), 1.42 (s, 9H).  $^{13}\text{C}\{^1\text{H}\}$  NMR (101 MHz,  $\text{CDCl}_3$ )  $\delta$  170.5, 155.9, 153.1, 134.8, 126.3, 126.2 (q,  $J$  = 275 Hz), 125.3, 123.0, 121.7, 79.9, 44.7, 38.7, 36.5 (q,  $J$  = 29.1 Hz), 28.3.  $^{19}\text{F}$  NMR (377 MHz,  $\text{CDCl}_3$ )  $\delta$  -64.11. HR-MS (ESI)  $m/z$ :  $[\text{M}+\text{H}]^+$  Calcd for  $\text{C}_{16}\text{H}_{20}\text{F}_3\text{N}_2\text{O}_2\text{S}^+$  361.1192, found: 361.1186. IR  $\nu_{\text{max}}$  (film,  $\text{cm}^{-1}$ ): 3340, 2985, 1693, 1511, 1367, 1251, 1127, 758, 708.

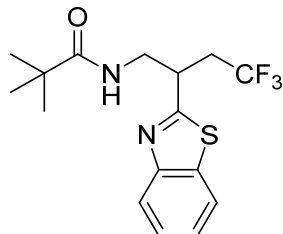

***N*-(2-(benzo[d]thiazol-2-yl)-4,4,4-trifluorobutyl)pivalamide (3c)**: Silica gel column chromatography (petroleum ether/acetone = 5:1), colorless oil; 27.5 mg, yield = 40%;  $^1\text{H}$  NMR (400 MHz,  $\text{CDCl}_3$ )  $\delta$  7.99 (d,  $J$  = 8.1 Hz, 1H), 7.88 (d,  $J$  = 7.9 Hz, 1H), 7.50 (t,  $J$  = 7.6 Hz, 1H), 7.41 (t,  $J$  = 7.5 Hz, 1H), 6.44 (s, 1H), 3.82 – 3.73 (m, 3H), 3.68 (m, 2H), 2.99 – 2.80 (m, 1H), 2.60 (m, 1H), 1.16 (s, 9H).  $^{13}\text{C}\{^1\text{H}\}$  NMR (101 MHz,  $\text{CDCl}_3$ )  $\delta$  178.9, 170.6, 153.0, 134.5, 126.4, 126.1 (q,  $J$  = 275 Hz), 125.4, 122.9, 121.8, 43.3, 38.8, 37.9 (d,  $J$  = 2.8 Hz), 36.8 (q,  $J$  = 29.1 Hz), 27.5.  $^{19}\text{F}$  NMR

(377 MHz, CDCl<sub>3</sub>)  $\delta$  -64.18. (ESI) m/z: [M+H]<sup>+</sup> Calcd for C<sub>16</sub>H<sub>20</sub>F<sub>3</sub>N<sub>2</sub>O<sup>+</sup> 345.1243, found: 345.1242. IR  $\nu_{\max}$  (film, cm<sup>-1</sup>): 3353, 2965, 1639, 1516, 1436, 1264, 1126, 1043, 758, 651.

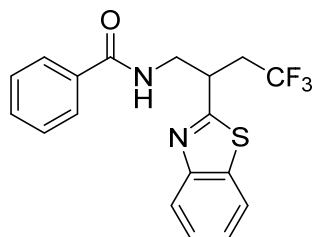

**N-(2-(benzo[d]thiazol-2-yl)-4,4,4-trifluorobutyl)benzamide (3d):** Silica gel column chromatography (petroleum ether/acetone = 5:1), white solid; 35.7 mg, yield = 49%; <sup>1</sup>H NMR (400 MHz, CDCl<sub>3</sub>)  $\delta$  8.02 (d, *J* = 8.1 Hz, 1H), 7.88 (d, *J* = 8.0 Hz, 1H), 7.81 – 7.72 (m, 2H), 7.55 – 7.46 (m, 2H), 7.42 (t, *J* = 7.7 Hz, 3H), 7.10 (s, 1H), 4.02 (dt, *J* = 14.7, 7.4 Hz, 1H), 3.89 (m, 2H), 3.05 – 2.85 (m, 1H), 2.70 (m, 1H). <sup>13</sup>C {<sup>1</sup>H} NMR (101 MHz, CDCl<sub>3</sub>)  $\delta$  170.6, 167.8, 153.0, 134.6, 134.0, 131.7, 128.6, 127.0, 126.4, 126.1 (q, *J* = 276 Hz), 125.5, 123.0, 121.8, 43.6, 38.1 (q, *J* = 2.5 Hz), 36.9 (q, *J* = 29.2 Hz). <sup>19</sup>F NMR (376 MHz, CDCl<sub>3</sub>)  $\delta$  -64.06. (ESI) m/z: [M+H]<sup>+</sup> Calcd for C<sub>18</sub>H<sub>16</sub>F<sub>3</sub>N<sub>2</sub>O<sup>+</sup> 365.0930, found: 365.0928. IR  $\nu_{\max}$  (film, cm<sup>-1</sup>): 3303, 2956, 1637, 1534, 1446, 1284, 1136, 760, 693.

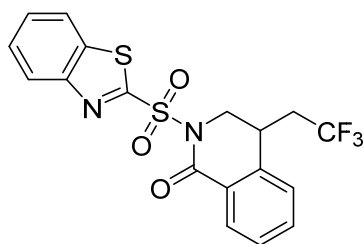

**2-(benzo[d]thiazol-2-ylsulfonyl)-4-(2,2,2-trifluoroethyl)-3,4-dihydroisoquinolin-1(2H)-one (3d'):** Silica gel column chromatography (petroleum ether/acetone = 5:1), white solid; 8.0 mg, yield = 9%; <sup>1</sup>H NMR (400 MHz, CDCl<sub>3</sub>)  $\delta$  8.15 – 8.08 (m, 1H), 8.03 (dd, *J* = 7.4, 4.2 Hz, 2H), 7.66 – 7.54 (m, 3H), 7.43 (t, *J* = 7.6 Hz, 1H), 7.36 (d, *J* = 7.6 Hz, 1H), 4.86 (d, *J* = 13.1 Hz, 1H), 4.26 (d, *J* = 12.9 Hz, 1H), 3.54 (s, 1H), 3.20 – 2.85 (m, 1H), 2.52 (dq, *J* = 15.6, 11.1, 5.8 Hz, 1H). <sup>13</sup>C NMR (151 MHz, CDCl<sub>3</sub>)  $\delta$  164.38, 163.07, 151.89, 141.16, 137.09, 134.65, 129.75, 128.64, 128.07, 127.61, 127.55, 126.74, 126.1 (q, *J* = 276 Hz), 125.35, 122.25, 49.44, 37.2 (q, *J* = 28.3 Hz), 33.10 (q, *J* = 2.7 Hz). <sup>19</sup>F NMR (377 MHz, CDCl<sub>3</sub>)  $\delta$  -63.82. (ESI) m/z: [M+H]<sup>+</sup> Calcd for C<sub>18</sub>H<sub>13</sub>F<sub>3</sub>N<sub>2</sub>O<sub>3</sub>S<sub>2</sub><sup>+</sup> 327.0392, found: 327.0389. IR  $\nu_{\max}$  (film, cm<sup>-1</sup>): 2920, 1697, 1471, 1370, 1259, 1176, 1063, 760, 630.

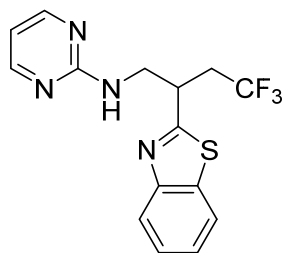

**N-(2-(benzo[d]thiazol-2-yl)-4,4,4-trifluorobutyl)pyrimidin-2-amine (3e):** Silica gel column chromatography (petroleum ether/acetone = 5:1), white solid; 45.3 mg, yield = 67%; <sup>1</sup>H NMR (400 MHz, CDCl<sub>3</sub>)  $\delta$  8.23 (d, *J* = 4.6 Hz, 2H), 8.01 (d, *J* = 8.1 Hz, 1H), 7.84 (d, *J* = 8.0 Hz, 1H), 7.57 –

7.45 (m, 1H), 7.45 – 7.33 (m, 1H), 6.52 (t,  $J = 4.8$  Hz, 1H), 6.08 (s, 1H), 4.02 – 3.78 (m, 3H), 3.01 (m, 1H), 2.80 – 2.59 (m, 1H).  $^{13}\text{C}\{^1\text{H}\}$  NMR (101 MHz,  $\text{CDCl}_3$ )  $\delta$  170.7, 162.1, 158.0, 153.1, 134.8, 126.3 (q,  $J = 276$  Hz), 126.2, 125.2, 123.0, 121.6, 111.1, 45.8, 38.3 (q,  $J = 2.6$  Hz), 36.6 (q,  $J = 28.9$  Hz).  $^{19}\text{F}$  NMR (377 MHz,  $\text{CDCl}_3$ )  $\delta$  -64.00. (ESI)  $m/z$ :  $[\text{M}+\text{H}]^+$  Calcd for  $\text{C}_{15}\text{H}_{14}\text{F}_3\text{N}_4\text{S}^+$  339.0886, found: 339.0881. IR  $\nu_{\text{max}}$  (film,  $\text{cm}^{-1}$ ): 3267, 2977, 1585, 1538, 1436, 1254, 1125, 801, 729.

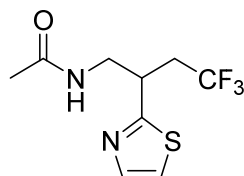

***N*-(4,4,4-trifluoro-2-(thiazol-2-yl)butyl)acetamide (3f)**: Silica gel column chromatography (petroleum ether/acetone = 4:1), light yellow oil; 41.8 mg, yield = 83%;  $^1\text{H}$  NMR (400 MHz,  $\text{CDCl}_3$ )  $\delta$  7.75 (d,  $J = 3.3$  Hz, 1H), 7.29 (d,  $J = 3.3$  Hz, 1H), 6.45 (s, 1H), 3.67 (m, 3H), 2.84 – 2.67 (m, 1H), 2.65 – 2.45 (m, 1H), 1.96 (s, 3H).  $^{13}\text{C}\{^1\text{H}\}$  NMR (101 MHz,  $\text{CDCl}_3$ )  $\delta$  170.7, 170.0, 142.7, 126.1 (q,  $J = 277.1$  Hz), 119.0, 43.6, 37.1 (q,  $J = 2.7$  Hz), 37.0 (d,  $J = 28.8$  Hz), 23.13.  $^{19}\text{F}$  NMR (376 MHz,  $\text{CDCl}_3$ )  $\delta$  -64.14. (ESI)  $m/z$ :  $[\text{M}+\text{H}]^+$  Calcd for  $\text{C}_9\text{H}_{12}\text{F}_3\text{N}_2\text{OS}^+$  253.0617, found: 253.0615. IR  $\nu_{\text{max}}$  (film,  $\text{cm}^{-1}$ ): 3291, 2942, 1655, 1547, 1372, 1256, 1129, 1090, 728, 592.

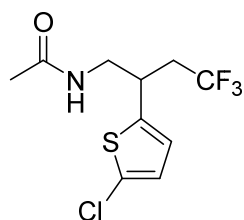

***N*-(2-(5-chlorothiophen-2-yl)-4,4,4-trifluorobutyl)acetamide (3g)**: Silica gel column chromatography (petroleum ether/acetone = 10:1), yellow oil; 42.8 mg, yield = 75%;  $^1\text{H}$  NMR (400 MHz,  $\text{CDCl}_3$ )  $\delta$  6.77 (d,  $J = 3.5$  Hz, 1H), 6.68 (d,  $J = 3.4$  Hz, 1H), 5.65 (s, 1H), 3.73 (dt,  $J = 13.1$ , 6.4 Hz, 1H), 3.41 (m, 1H), 3.23 (dt,  $J = 13.5$ , 6.7 Hz, 1H), 2.52 – 2.36 (m, 2H), 1.97 (s, 3H);  $^{13}\text{C}\{^1\text{H}\}$  NMR (101 MHz,  $\text{CDCl}_3$ )  $\delta$  170.4, 142.4, 128.8, 126.1, 125.9 (q,  $J = 277$  Hz), 124.8, 45.0, 38.4 (q,  $J = 28.5$  Hz), 36.1 (q,  $J = 2.5$  Hz), 23.1;  $^{19}\text{F}$  NMR (377 MHz,  $\text{CDCl}_3$ )  $\delta$  -63.82. HR-MS (ESI)  $m/z$ :  $[\text{M}+\text{H}]^+$  Calcd for  $\text{C}_{10}\text{H}_{12}\text{ClF}_3\text{NOS}^+$  286.0275, found: 286.0274. IR  $\nu_{\text{max}}$  (film,  $\text{cm}^{-1}$ ): 3305, 2950, 1637, 1534, 1436, 1254, 1136, 758, 693.

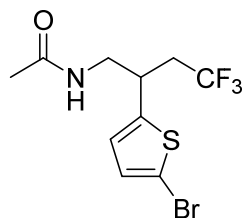

***N*-(2-(5-bromothiophen-2-yl)-4,4,4-trifluorobutyl)acetamide (3h)**: Silica gel column chromatography (petroleum ether/acetone = 10:1), yellow oil; 47.4 mg, yield = 72%;  $^1\text{H}$  NMR (400 MHz,  $\text{CDCl}_3$ )  $\delta$  6.91 (d,  $J = 3.3$  Hz, 1H), 6.66 (d,  $J = 3.1$  Hz, 1H), 5.72 (s, 1H), 3.71 (dt,  $J = 13.1$ , 6.3 Hz, 1H), 3.43 (m, 1H), 3.22 (m, 1H), 2.68 – 2.25 (m, 2H), 1.95 (s, 3H).  $^{13}\text{C}\{^1\text{H}\}$  NMR (101 MHz,  $\text{CDCl}_3$ )  $\delta$  170.4, 145.3, 129.9, 126.0 (q,  $J = 275$  Hz), 125.9, 110.9, 45.0, 38.4 (q,  $J = 28.4$  Hz), 36.1 (q,  $J = 2.8$  Hz), 23.2.  $^{19}\text{F}$  NMR (376 MHz,  $\text{CDCl}_3$ )  $\delta$  -63.78. (ESI)  $m/z$ :  $[\text{M}+\text{H}]^+$  Calcd for



C<sub>10</sub>H<sub>12</sub>BrF<sub>3</sub>NOS<sup>+</sup> 329.9770, found: 329.9768. IR  $\nu_{\max}$  (film, cm<sup>-1</sup>): 3291, 2946, 1653, 1551, 1437, 1251, 1128, 1046, 795, 599.

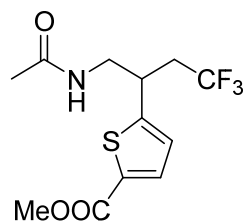

**ethyl 5-(1-acetamido-4,4,4-trifluorobutan-2-yl)thiophene-2-carboxylate (3i)**: Silica gel column chromatography (petroleum ether/acetone = 8:1), yellow solid; 43.2 mg, yield = 70%; <sup>1</sup>H NMR (400 MHz, CDCl<sub>3</sub>)  $\delta$  7.49 (d,  $J$  = 5.1 Hz, 1H), 7.05 (d,  $J$  = 5.1 Hz, 1H), 5.89 (s, 1H), 4.37 – 4.25 (m, 1H), 3.87 (s, 3H), 3.60 (dt,  $J$  = 12.4, 5.9 Hz, 1H), 3.45 (dt,  $J$  = 13.9, 7.2 Hz, 1H), 2.58 – 2.47 (m, 2H), 1.87 (s, 3H). <sup>13</sup>C {<sup>1</sup>H} NMR (101 MHz, CDCl<sub>3</sub>)  $\delta$  170.2, 163.2, 148.5, 131.5, 127.9, 127.7, 126.3 (q,  $J$  = 276 Hz), 52.2, 44.0, 36.8 (q,  $J$  = 28.3 Hz), 33.2 (q,  $J$  = 2.7 Hz), 23.1. <sup>19</sup>F NMR (376 MHz, CDCl<sub>3</sub>)  $\delta$  -63.98. HR-MS (ESI)  $m/z$ : [M+H]<sup>+</sup> Calcd for C<sub>12</sub>H<sub>15</sub>F<sub>3</sub>NO<sub>3</sub>S<sup>+</sup> 310.0719, found: 310.0716. IR  $\nu_{\max}$  (film, cm<sup>-1</sup>): 3285, 2953, 1709, 1657, 1536, 1438, 1246, 1143, 778, 680.

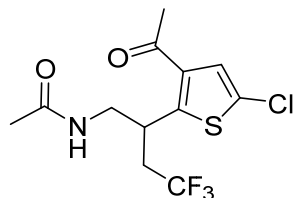

**N-(2-(3-acetyl-5-chlorothiophen-2-yl)-4,4,4-trifluorobutyl)acetamide (3j)**: Silica gel column chromatography (petroleum ether/acetone = 8:1), yellow solid; 40.0 mg, yield = 61%; <sup>1</sup>H NMR (400 MHz, CDCl<sub>3</sub>)  $\delta$  7.15 (s, 1H), 6.32 (s, 1H), 4.35 – 4.22 (m, 1H), 3.59 (dt,  $J$  = 11.8, 5.0 Hz, 1H), 3.45 (dt,  $J$  = 13.4, 6.4 Hz, 1H), 2.57 – 2.49 (m, 2H), 2.48 (s, 3H), 1.92 (s, 3H). <sup>13</sup>C {<sup>1</sup>H} NMR (101 MHz, CDCl<sub>3</sub>)  $\delta$  194.4, 170.8, 150.7, 136.7, 128.5, 127.4, 126.0 (q,  $J$  = 275 Hz), 45.0, 38.0 (q,  $J$  = 28.7 Hz), 34.2 (q,  $J$  = 2.8 Hz), 30.1, 23.1. <sup>19</sup>F NMR (376 MHz, CDCl<sub>3</sub>)  $\delta$  -63.98. (ESI)  $m/z$ : [M+H]<sup>+</sup> Calcd for C<sub>12</sub>H<sub>14</sub>F<sub>3</sub>N<sub>1</sub>O<sub>2</sub>SCl<sup>+</sup> 328.03380, found: 329.0379. IR  $\nu_{\max}$  (film, cm<sup>-1</sup>): 3297, 3068, 1655, 1524, 1444, 1363, 1255, 1134, 1060, 873, 596.

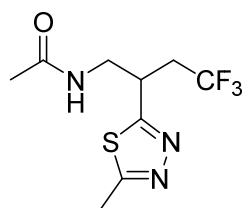

**N-(4,4,4-trifluoro-2-(5-methyl-1,3,4-thiadiazol-2-yl)butyl)acetamide (3k)**: Silica gel column chromatography (petroleum ether/acetone = 4:1), yellow oil; 40.0 mg, yield = 75%; <sup>1</sup>H NMR (400 MHz, CDCl<sub>3</sub>)  $\delta$  6.54 (s, 1H), 3.78 (dt,  $J$  = 8.1, 5.6 Hz, 1H), 3.66 (t,  $J$  = 6.2 Hz, 2H), 2.73 (m, 4H), 2.60 (m, 1H), 1.95 (s, 3H); <sup>13</sup>C {<sup>1</sup>H} NMR (101 MHz, CDCl<sub>3</sub>)  $\delta$  170.8, 167.0, 165.7, 125.9 (q,  $J$  = 277 Hz), 43.23, 36.9 (q,  $J$  = 29.1 Hz), 35.0 (q,  $J$  = 2.5 Hz), 23.1, 15.6. <sup>19</sup>F NMR (376 MHz, CDCl<sub>3</sub>)  $\delta$  -64.01. HR-MS (ESI)  $m/z$ : [M+H]<sup>+</sup> Calcd for C<sub>9</sub>H<sub>13</sub>F<sub>3</sub>N<sub>3</sub>OS<sup>+</sup> 268.0726, found: 268.0725. IR  $\nu_{\max}$  (film, cm<sup>-1</sup>): 3276, 2921, 1654, 1546, 1433, 1255, 1136, 1059, 632.

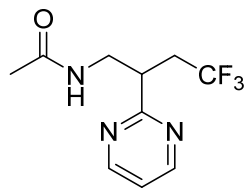

**N-(4,4,4-trifluoro-2-(pyrimidin-2-yl)butyl)acetamide (3l):** Silica gel column chromatography (petroleum ether/acetone = 4:1), white solid; 23.7 mg, yield = 48%;  $^1\text{H}$  NMR (400 MHz,  $\text{CDCl}_3$ )  $\delta$  8.71 (d,  $J = 4.9$  Hz, 2H), 7.22 (t,  $J = 4.9$  Hz, 1H), 6.33 (s, 1H), 3.78 – 3.59 (m, 2H), 3.52 (ddd,  $J = 12.7, 8.2, 5.0$  Hz, 1H), 3.04 – 2.76 (m, 1H), 2.48 (m, 1H), 1.92 (s, 1H).  $^{13}\text{C}\{^1\text{H}\}$  NMR (101 MHz,  $\text{CDCl}_3$ )  $\delta$  170.5, 169.6, 157.3, 126.6 (q,  $J = 277.0$  Hz), 119.6, 42.7, 42.4 (q,  $J = 2.4$  Hz), 35.4 (q,  $J = 28.7$  Hz), 23.2.  $^{19}\text{F}$  NMR (376 MHz,  $\text{CDCl}_3$ )  $\delta$  -64.20. (ESI)  $m/z$ :  $[\text{M}+\text{H}]^+$  Calcd for  $\text{C}_{10}\text{H}_{13}\text{F}_3\text{N}_3\text{O}^+$  248.1005 found: 2248.1005. IR  $\nu_{\text{max}}$  (film,  $\text{cm}^{-1}$ ): 3291, 2942, 1652, 1565, 1427, 1259, 1145, 1080, 805, 637.

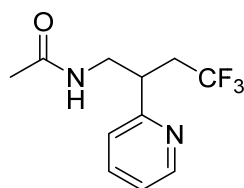

**N-(4,4,4-trifluoro-2-(pyridin-2-yl)butyl)acetamide (3m):** Silica gel column chromatography (petroleum ether/acetone = 4:1), colorless oil; 12.3 mg, yield = 25%;  $^1\text{H}$  NMR (400 MHz,  $\text{CDCl}_3$ )  $\delta$  8.59 (d,  $J = 4.2$  Hz, 1H), 7.77 – 7.57 (m, 1H), 7.21 (t,  $J = 8.3$  Hz, 2H), 6.33 (s, 1H), 3.67 (dt,  $J = 13.7, 6.9$  Hz, 1H), 3.54 (dt,  $J = 13.4, 4.9$  Hz, 1H), 3.45 – 3.29 (m, 1H), 2.74 (m, 1H), 2.56 – 2.36 (m, 1H), 1.94 (s, 3H).  $^{13}\text{C}\{^1\text{H}\}$  NMR (101 MHz,  $\text{CDCl}_3$ )  $\delta$  170.6, 160.4, 149.5, 137.2, 126.5 (q,  $J = 275$  Hz), 123.8, 122.5, 43.6, 40.3 (d,  $J = 2.4$  Hz), 36.4 (q,  $J = 28.3$  Hz), 23.2.  $^{19}\text{F}$  NMR (376 MHz,  $\text{CDCl}_3$ )  $\delta$  -64.03. (ESI)  $m/z$ :  $[\text{M}+\text{H}]^+$  Calcd for  $\text{C}_{11}\text{H}_{14}\text{F}_3\text{N}_2\text{O}^+$  247.1053, found: 247.1053. IR  $\nu_{\text{max}}$  (film,  $\text{cm}^{-1}$ ): 3294, 2933, 1651, 1550, 1437, 160, 1141, 750, 594.

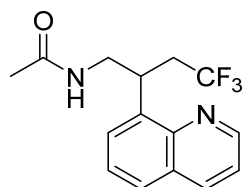

**N-(4,4,4-trifluoro-2-(quinolin-8-yl)butyl)acetamide (3n):** Silica gel column chromatography (petroleum ether/acetone = 6:1), yellow solid; 23.7 mg, yield = 40%;  $^1\text{H}$  NMR (400 MHz,  $\text{CDCl}_3$ )  $\delta$  8.94 – 8.82 (m, 1H), 8.18 (d,  $J = 8.2$  Hz, 1H), 7.76 (d,  $J = 7.9$  Hz, 1H), 7.58 (d,  $J = 6.7$  Hz, 1H), 7.51 (t,  $J = 7.6$  Hz, 1H), 7.43 (dd,  $J = 8.3, 4.2$  Hz, 1H), 6.24 (s, 1H), 4.35 – 4.19 (m, 1H), 3.79 (qt,  $J = 13.3, 6.7$  Hz, 2H), 3.03 (m, 1H), 2.73 (m, 1H), 1.80 (s, 2H).  $^{13}\text{C}\{^1\text{H}\}$  NMR (101 MHz,  $\text{CDCl}_3$ )  $\delta$  170.2, 149.3, 146.4, 138.8, 136.9, 129.1, 128.8, 127.7, 126.8 (q,  $J = 276$  Hz), 126.5, 121.2, 44.6, 36.6, (q,  $J = 27.8$  Hz), 36.3, 23.2.  $^{19}\text{F}$  NMR (377 MHz,  $\text{CDCl}_3$ )  $\delta$  -63.96. (ESI)  $m/z$ :  $[\text{M}+\text{H}]^+$  Calcd for  $\text{C}_{15}\text{H}_{16}\text{F}_3\text{N}_2\text{O}^+$  297.1209, found: 297.1208. IR  $\nu_{\text{max}}$  (film,  $\text{cm}^{-1}$ ): 3288, 2936, 1646, 1551, 1268, 1258, 1141, 1037, 795, 595.

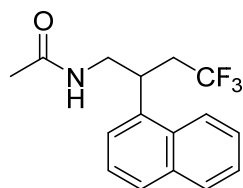

**N-(4,4,4-trifluoro-2-(naphthalen-1-yl)butyl)acetamide (3o):** Silica gel column chromatography (petroleum ether/acetone = 8:1), white solid; 20.6 mg, yield = 35%;  $^1\text{H}$  NMR (400 MHz,  $\text{CDCl}_3$ )  $\delta$  8.11 (d,  $J = 8.3$  Hz, 1H), 7.89 (d,  $J = 7.9$  Hz, 1H), 7.80 (d,  $J = 8.1$  Hz, 1H), 7.53 (m, 3H), 7.39 (d,  $J = 7.2$  Hz, 1H), 5.47 (s, 1H), 4.17 (m, 1H), 4.00 – 3.82 (m, 1H), 3.47 (m, 1H), 2.64 (m, 2H), 1.81 (s, 3H).  $^{13}\text{C}\{^1\text{H}\}$  NMR (101 MHz,  $\text{CDCl}_3$ )  $\delta$  170.4, 136.7, 134.1, 131.8, 129.16, 128.02, 126.67, 126.5 (q,  $J = 275$  Hz), 125.97, 125.41, 123.52, 122.48, 44.38, 37.74 (q,  $J = 28.2$  Hz), 32.7, 23.10.  $^{19}\text{F}$  NMR (376 MHz,  $\text{CDCl}_3$ )  $\delta$  -63.67. HR-MS (ESI)  $m/z$ :  $[\text{M}+\text{H}]^+$  Calcd for  $\text{C}_{16}\text{H}_{17}\text{F}_3\text{NO}^+$  296.1257, found: 296.1256. IR  $\nu_{\text{max}}$  (film,  $\text{cm}^{-1}$ ): 3285, 2930, 1650, 1550, 1370, 1261, 1137, 778, 662.

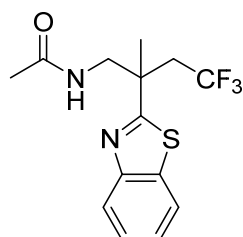

**N-(2-(benzo[d]thiazol-2-yl)-4,4,4-trifluoro-2-methylbutyl)acetamide (3p):** Silica gel column chromatography (petroleum ether/acetone = 5:1), colorless oil; 48.0 mg, yield = 76%;  $^1\text{H}$  NMR (400 MHz,  $\text{CDCl}_3$ )  $\delta$  8.00 (d,  $J = 8.1$  Hz, 1H), 7.89 (d,  $J = 7.9$  Hz, 1H), 7.50 (t,  $J = 7.6$  Hz, 1H), 7.41 (t,  $J = 7.5$  Hz, 1H), 6.37 (s, 1H), 3.85 (dd,  $J = 13.6, 6.9$  Hz, 1H), 3.53 (dd,  $J = 13.6, 5.4$  Hz, 1H), 3.01 (m, 1H), 2.74 – 2.44 (m, 1H), 2.00 (s, 3H), 1.67 (s, 3H).  $^{13}\text{C}\{^1\text{H}\}$  NMR (101 MHz,  $\text{CDCl}_3$ )  $\delta$  175.9, 170.4, 152.8, 134.6, 126.3, 126.1 (q,  $J = 277$  Hz), 125.4, 123.1, 121.7, 48.6, 42.5, 42.2 (d,  $J = 27.7$  Hz), 23.4, 23.0.  $^{19}\text{F}$  NMR (376 MHz,  $\text{CDCl}_3$ )  $\delta$  -59.57. (ESI)  $m/z$ :  $[\text{M}+\text{H}]^+$  Calcd for  $\text{C}_{14}\text{H}_{16}\text{F}_3\text{N}_2\text{OS}^+$  317.0930, found: 317.0927. IR  $\nu_{\text{max}}$  (film,  $\text{cm}^{-1}$ ): 3285, 2942, 1656, 1551, 1436, 1259, 1107, 759, 600.

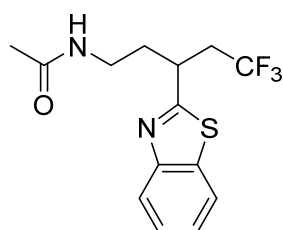

**N-(3-(benzo[d]thiazol-2-yl)-5,5,5-trifluoropentyl)acetamide (3q):** Silica gel column chromatography (petroleum ether/acetone = 4:1), colorless oil; 31.6 mg, yield = 50%;  $^1\text{H}$  NMR (400 MHz,  $\text{CDCl}_3$ )  $\delta$  7.98 (d,  $J = 8.1$  Hz, 1H), 7.85 (d,  $J = 8.0$  Hz, 1H), 7.54 – 7.44 (m, 1H), 7.42 – 7.34 (m, 1H), 6.01 (s, 1H), 3.60 (tt,  $J = 9.7, 5.3$  Hz, 1H), 3.30 (dq,  $J = 13.0, 6.2$  Hz, 1H), 3.12 (dq,  $J = 13.6, 7.1$  Hz, 1H), 2.94 – 2.74 (m, 1H), 2.57 (m, 1H), 2.22 – 2.00 (m, 2H), 1.86 (s, 3H).  $^{13}\text{C}\{^1\text{H}\}$  NMR (101 MHz,  $\text{CDCl}_3$ )  $\delta$  172.3, 170.5, 152.8, 134.6, 126.4, 126.0 (q,  $J = 276$  Hz), 125.4, 122.9, 121.8, 39.1 (q,  $J = 28.6$  Hz), 37.0, 36.6 (q,  $J = 2.7$  Hz), 35.3, 23.1.  $^{19}\text{F}$  NMR (376 MHz,  $\text{CDCl}_3$ )  $\delta$  -64.01. (ESI)  $m/z$ :  $[\text{M}+\text{H}]^+$  Calcd for  $\text{C}_{14}\text{H}_{16}\text{F}_3\text{N}_2\text{OS}^+$  317.0930, found: 317.0930. IR  $\nu_{\text{max}}$  (film,  $\text{cm}^{-1}$ ): 3282, 2942, 1647, 1553, 1437, 1251, 1124, 1050, 759, 647.

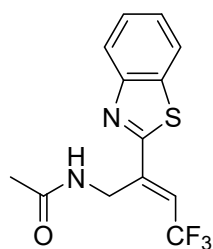

**(E)-N-(2-(benzo[d]thiazol-2-yl)-4,4,4-trifluorobut-2-en-1-yl)acetamide (3r):** Silica gel column chromatography (petroleum ether/acetone = 4:1), white solid; 22.8 mg, yield = 38%;  $^1\text{H}$  NMR (400 MHz,  $\text{CDCl}_3$ )  $\delta$  8.06 (d,  $J$  = 8.1 Hz, 1H), 7.90 (d,  $J$  = 7.9 Hz, 1H), 7.53 (t,  $J$  = 7.6 Hz, 1H), 7.46 (t,  $J$  = 7.6 Hz, 1H), 6.62 (q,  $J$  = 8.2 Hz, 1H), 6.48 (s, 1H), 4.70 (d,  $J$  = 5.7 Hz, 2H), 1.97 (s, 3H).  $^{13}\text{C}\{^1\text{H}\}$  NMR (101 MHz,  $\text{CDCl}_3$ )  $\delta$  170.0, 165.4, 153.3, 141.7 (q,  $J$  = 5.3 Hz), 134.8, 126.9, 126.7, 123.9, 122.8 (q,  $J$  = 35.7 Hz), 122.4 (q,  $J$  = 270 Hz), 121.8, 37.6, 23.2.  $^{19}\text{F}$  NMR (376 MHz,  $\text{CDCl}_3$ )  $\delta$  -56.84. HR-MS (ESI)  $m/z$ :  $[\text{M}+\text{H}]^+$  Calcd for  $\text{C}_{13}\text{H}_{12}\text{F}_3\text{N}_2\text{OS}^+$  301.0617, found: 301.0616. IR  $\nu_{\text{max}}$  (film,  $\text{cm}^{-1}$ ): 3279, 2988, 1654, 1559, 1281, 1270, 1123, 1056, 879, 760.

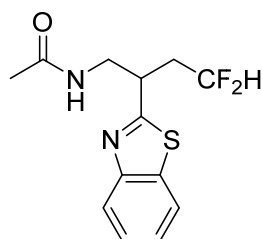

**N-(2-(benzo[d]thiazol-2-yl)-4,4-difluorobutyl)acetamide (3s):** Silica gel column chromatography (petroleum ether/acetone = 4:1), colorless oil; 22.2 mg, yield = 39%;  $^1\text{H}$  NMR (400 MHz,  $\text{CDCl}_3$ )  $\delta$  8.00 (d,  $J$  = 8.1 Hz, 1H), 7.87 (d,  $J$  = 8.0 Hz, 1H), 7.49 (t,  $J$  = 7.7 Hz, 1H), 7.40 (t,  $J$  = 7.6 Hz, 1H), 6.33 (s, 1H), 5.95 (tt,  $J$  = 56.4, 4.7 Hz, 1H), 3.70 (m, 3H), 2.50 (m, 1H), 2.32 (m, 1H), 1.96 (s, 3H).  $^{13}\text{C}\{^1\text{H}\}$  NMR (101 MHz,  $\text{CDCl}_3$ )  $\delta$  171.3, 170.8, 152.9, 134.6, 126.4, 125.5, 123.0, 121.8, 115.7 (t,  $J$  = 239.6 Hz), 43.0, 38.7 (t,  $J$  = 5.4 Hz), 36.9 (t,  $J$  = 22.2 Hz), 23.2.  $^{19}\text{F}$  NMR (376 MHz,  $\text{CDCl}_3$ )  $\delta$  -115.29 (dd,  $J$  = 417.4 Hz,  $J$  = 285.7 Hz). (ESI)  $m/z$ :  $[\text{M}+\text{H}]^+$  Calcd for  $\text{C}_{13}\text{H}_{15}\text{F}_2\text{N}_2\text{OS}^+$  285.0868, found: 285.0866. IR  $\nu_{\text{max}}$  (film,  $\text{cm}^{-1}$ ): 3288, 2933, 1654, 1549, 1437, 1286, 1121, 1013, 760, 709.

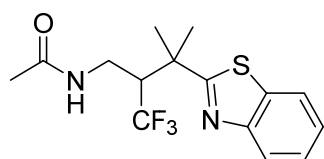

**N-(3-(benzo[d]thiazol-2-yl)-3-methyl-2-(trifluoromethyl)butyl)acetamide (3t):** Silica gel column chromatography (petroleum ether/acetone = 4:1), colorless oil; 29.0 mg, yield = 44%;  $^1\text{H}$  NMR (400 MHz,  $\text{CDCl}_3$ )  $\delta$  7.96 (d,  $J$  = 8.2 Hz, 1H), 7.89 – 7.85 (m, 1H), 7.47 (ddd,  $J$  = 8.3, 7.3, 1.3 Hz, 1H), 7.37 (td,  $J$  = 7.7, 1.2 Hz, 1H), 5.98 (s, 1H), 3.75 – 3.68 (m, 1H), 3.52 (ddd,  $J$  = 14.6, 7.1, 5.3 Hz, 1H), 3.29 (m, 1H), 1.83 (s, 3H), 1.64 (s, 3H), 1.63 – 1.61 (m, 3H).  $^{13}\text{C}\{^1\text{H}\}$  NMR (101 MHz,  $\text{CDCl}_3$ )  $\delta$  179.1, 169.8, 152.8, 134.6, 127.5 (q,  $J$  = 282 Hz), 126.2, 125.1, 122.8, 121.7, 51.5 (q,  $J$  = 22.8 Hz), 42.2, 36.4 (q,  $J$  = 3.0 Hz), 27.5 (q,  $J$  = 2.5 Hz), 26.0, 23.1.  $^{19}\text{F}$  NMR (377 MHz,  $\text{CDCl}_3$ )  $\delta$  -62.05. HR-MS (ESI)  $m/z$ :  $[\text{M}+\text{H}]^+$  Calcd for  $\text{C}_{15}\text{H}_{18}\text{F}_3\text{N}_2\text{OS}^+$  331.1087, found: 331.1084. IR  $\nu_{\text{max}}$  (film,  $\text{cm}^{-1}$ ): 3297, 2985, 1653, 1554, 1437, 1245, 1152, 758, 602.

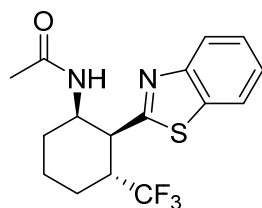

***N*-((1*R*,2*S*,3*R*)-2-(benzo[d]thiazol-2-yl)-3-(trifluoromethyl)cyclohexyl)acetamide (3u):** Silica gel column chromatography (petroleum ether/acetone = 5:1), white oil; 29.4 mg, yield = 43%, > 20:1 dr;  $^1\text{H}$  NMR (600 MHz, Chloroform-*d*)  $\delta$  7.98 (d,  $J$  = 8.1 Hz, 1H), 7.86 (d,  $J$  = 8.0 Hz, 1H), 7.48 (t,  $J$  = 7.6 Hz, 1H), 7.39 (t,  $J$  = 7.6 Hz, 1H), 6.71 (d,  $J$  = 5.1 Hz, 1H), 4.40 (m, 1H), 3.69 (dd,  $J$  = 7.2, 4.8 Hz, 1H), 3.04 (m, 1H), 2.29 – 2.17 (m, 2H), 1.91 (s, 3H) 1.77 (m, 1H), 1.73 – 1.65 (m, 2H), 1.62 (m, 1H).  $^{13}\text{C}$  NMR (151 MHz, Chloroform-*d*)  $\delta$  170.1, 169.3, 152.9, 134.4, 127.3 (q,  $J$  = 279 Hz), 126.3, 125.4, 122.8, 121.7, 48.1, 42.5 (q,  $J$  = 25.5 Hz), 42.3, 28.4, 23.5, 22.8, 19.3.  $^{19}\text{F}$  NMR (565 MHz, Chloroform-*d*)  $\delta$  -68.34. (ESI)  $m/z$ :  $[\text{M}+\text{H}]^+$  Calcd for  $\text{C}_{16}\text{H}_{18}\text{F}_3\text{N}_2\text{OS}^+$  343.1087, found: 343,1081. IR  $\nu_{\text{max}}$  (film,  $\text{cm}^{-1}$ ): 3285, 2945, 1645, 1545, 1437, 1343, 1148, 907, 759, 502.

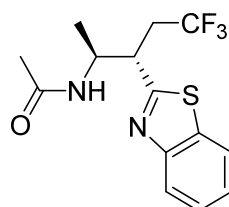

***N*-((2*S*,3*S*)-3-(benzo[d]thiazol-2-yl)-5,5,5-trifluoropentan-2-yl)acetamide (3v):** Silica gel column chromatography (petroleum ether/acetone = 5:1), colorless oil; 36.5 mg, yield = 58%, 88:12 er.  $[\alpha]_{\text{D}}^{20.0} = -22.67$  ( $c$  = 0.3 in acetone,  $\lambda$  = 589 nm).  $^1\text{H}$  NMR (400 MHz,  $\text{CDCl}_3$ )  $\delta$  8.02 (d,  $J$  = 8.1 Hz, 1H), 7.89 (d,  $J$  = 7.9 Hz, 1H), 7.51 (t,  $J$  = 7.6 Hz, 1H), 7.42 (t,  $J$  = 7.5 Hz, 1H), 6.94 (d,  $J$  = 8.4 Hz, 1H), 4.54 (m, 1H), 3.54 (d,  $J$  = 9.1 Hz, 1H), 2.92 (dq,  $J$  = 20.4, 10.3 Hz, 1H), 2.64 (p,  $J$  = 12.5, 11.8 Hz, 1H), 2.08 (s, 3H), 1.08 (d,  $J$  = 6.7 Hz, 3H).  $^{13}\text{C}\{^1\text{H}\}$  NMR (101 MHz,  $\text{CDCl}_3$ )  $\delta$  169.9, 169.4, 153.2, 134.4, 126.4, 126.3 (q,  $J$  = 276 Hz), 125.5, 123.0, 121.7, 48.1, 42.0 (q,  $J$  = 2.5 Hz), 37.7 (q,  $J$  = 28.7 Hz), 23.6, 19.7.  $^{19}\text{F}$  NMR (377 MHz,  $\text{CDCl}_3$ )  $\delta$  -64.39. (ESI)  $m/z$ :  $[\text{M}+\text{H}]^+$  Calcd for  $\text{C}_{14}\text{H}_{16}\text{F}_3\text{N}_2\text{OS}^+$  317.0930, found: 317.0924. IR  $\nu_{\text{max}}$  (film,  $\text{cm}^{-1}$ ): 3250, 2986, 1651, 1515, 1438, 1257, 1128, 759, 649. The enantioselectivity was determined by UPCC (Trefoil AMY1, gradient 100%  $\text{CO}_2$  to  $\text{CO}_2/\text{MeOH}$  = 90:10 in 0-22<sup>th</sup> min, flow rate: 0.2 mL/min,  $\lambda$  = 254 nm),  $t_{\text{R}}$  (major) = 20.3 min,  $t_{\text{R}}$  (minor) = 19.4 min.

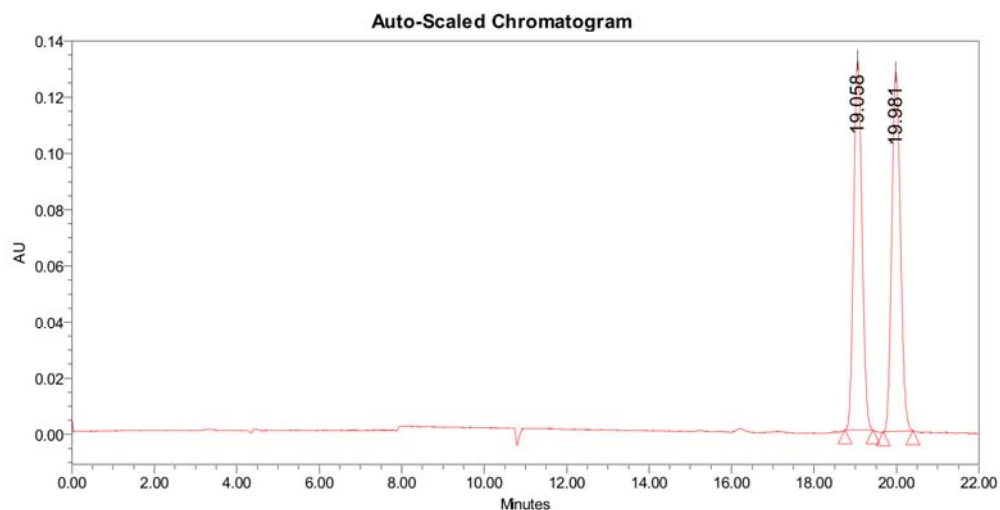

**Peak Results**

|   | RT     | Area    | Height | % Area | % Height |
|---|--------|---------|--------|--------|----------|
| 1 | 19.058 | 1809211 | 131590 | 49.48  | 50.69    |
| 2 | 19.981 | 1847008 | 127985 | 50.52  | 49.31    |

**Figure S9.** Chromatograms of Racemic **3v**

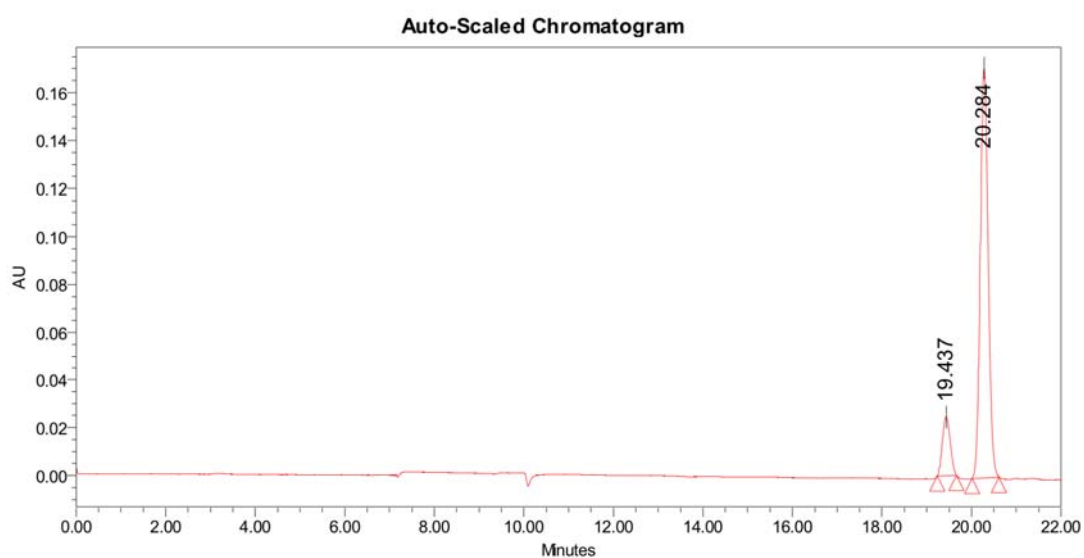

**Peak Results**

|   | RT     | Area    | Height | % Area | % Height |
|---|--------|---------|--------|--------|----------|
| 1 | 19.437 | 294147  | 24479  | 12.27  | 12.51    |
| 2 | 20.284 | 2103952 | 171183 | 87.73  | 87.49    |

**Figure S10.** Chromatograms of Product **3v**

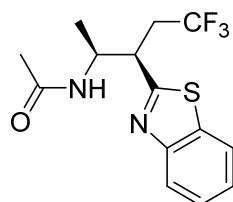

**N-((2S,3R)-3-(benzo[d]thiazol-2-yl)-5,5,5-trifluoropentan-2-yl)acetamide (3v2):** Silica gel column chromatography (petroleum ether/acetone = 5:1), colorless oil; 5.2 mg, yield = 8%, 88:12

er.  $[\alpha]_D^{20.0} = -5.33$  ( $c = 0.3$  in acetone,  $\lambda = 589$  nm).  $^1\text{H}$  NMR (400 MHz,  $\text{CDCl}_3$ )  $\delta$  8.02 (d,  $J = 8.2$  Hz, 1H), 7.88 (d,  $J = 8.0$  Hz, 1H), 7.50 (t,  $J = 7.7$  Hz, 1H), 7.41 (t,  $J = 7.6$  Hz, 1H), 5.62 (d,  $J = 7.8$  Hz, 1H), 4.43 (dq,  $J = 13.6, 6.8$  Hz, 1H), 3.72 (ddd,  $J = 9.7, 6.3, 3.7$  Hz, 1H), 3.03 (m, 1H), 2.60 (m, 1H), 2.02 (s, 3H), 1.13 (d,  $J = 6.8$  Hz, 3H).  $^{13}\text{C}\{^1\text{H}\}$  NMR (101 MHz,  $\text{CDCl}_3$ )  $\delta$  169.7, 168.7, 153.0, 134.7, 126.3, 126.2 (q,  $J = 275$  Hz), 125.4, 123.2, 121.6, 48.3, 42.9 (q,  $J = 2.5$  Hz), 36.4 (q,  $J = 29.1$  Hz), 23.5, 16.7.  $^{19}\text{F}$  NMR (377 MHz,  $\text{CDCl}_3$ )  $\delta$  -64.37. (ESI)  $m/z$ :  $[\text{M}+\text{H}]^+$  Calcd for  $\text{C}_{14}\text{H}_{16}\text{F}_3\text{N}_2\text{OS}^+$  317.0930, found: 317.0925. IR  $\nu_{\text{max}}$  (film,  $\text{cm}^{-1}$ ): 3280, 2923, 1654, 1545, 1438, 1263, 1127, 759, 647. The enantioselectivity was determined by UPCC (Chiralcel OD-3, gradient 100%  $\text{CO}_2$  to  $\text{CO}_2/\text{MeOH} = 80:20$  in 0-10<sup>th</sup> min, flow rate: 0.5 mL/min,  $\lambda = 254$  nm),  $t_R$  (major) = 8.7 min,  $t_R$ (minor) = 8.1 min.

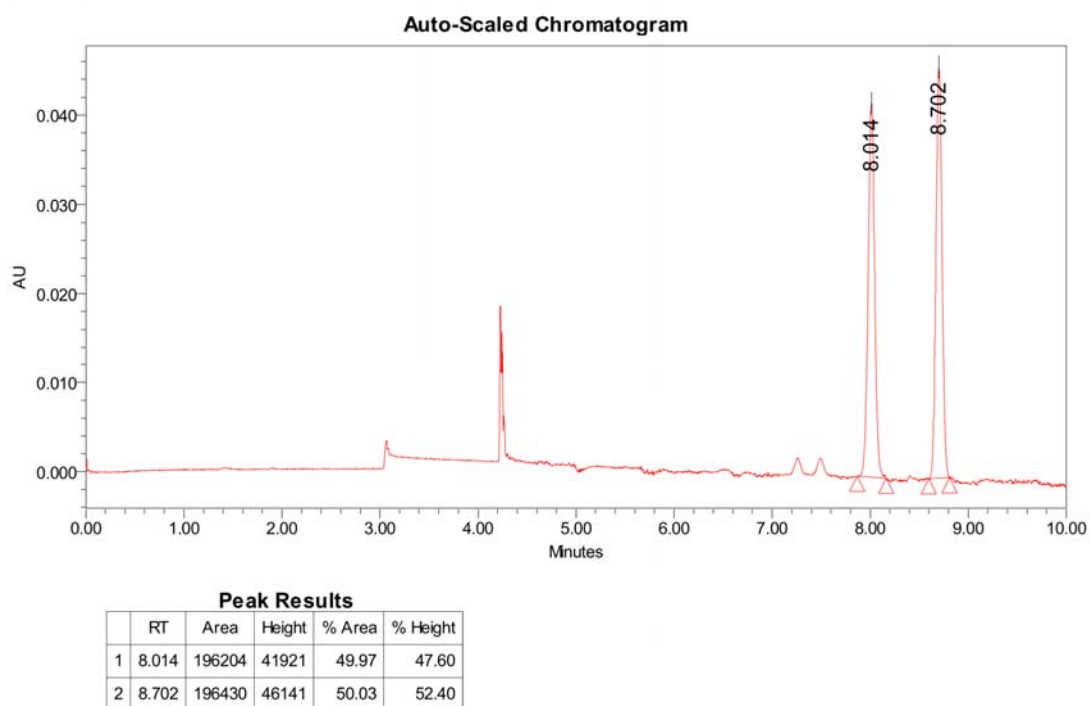

**Figure S11.** Chromatograms of racemic **3v2**

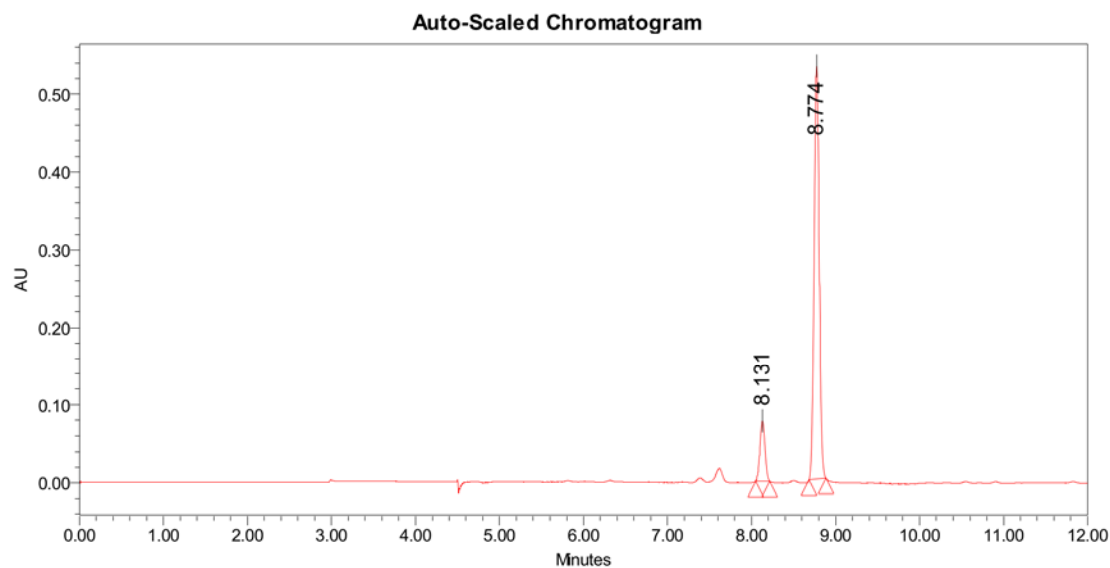

**Peak Results**

|   | RT    | Area    | Height | % Area | % Height |
|---|-------|---------|--------|--------|----------|
| 1 | 8.131 | 318522  | 77051  | 12.25  | 12.66    |
| 2 | 8.774 | 2280933 | 531682 | 87.75  | 87.34    |

**Figure S12.** Chromatograms of product **3v2**

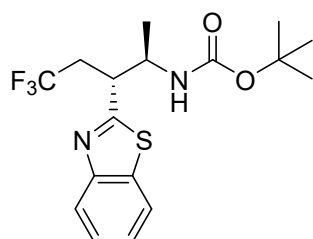

**tert-butyl ((2R,3R)-3-(benzo[d]thiazol-2-yl)-5,5,5-trifluoropentan-2-yl)carbamate (3v')**: Silica gel column chromatography (petroleum ether/acetone = 15:1), colorless oil; 12 mg, yield = 32%;  $^1\text{H}$  NMR (400 MHz, Chloroform-*d*)  $\delta$  8.04 (d,  $J$  = 8.1 Hz, 1H), 7.88 (d,  $J$  = 8.0 Hz, 1H), 7.55 – 7.46 (m, 1H), 7.45 – 7.36 (m, 1H), 5.61 (d,  $J$  = 8.9 Hz, 1H), 4.20 (m, 1H), 3.74 – 3.44 (m, 2H), 3.18 – 2.87 (m, 1H), 2.87 – 2.53 (m, 1H), 1.48 (s, 9H), 1.09 (d,  $J$  = 6.8 Hz, 3H).  $^{13}\text{C}$  NMR (101 MHz, Chloroform-*d*)  $\delta$  169.3, 155.6, 153.2, 134.5, 126.5 (q,  $J$  = 275 Hz), 126.3, 125.4, 123.1, 121.6, 79.7, 49.7, 42.4, 37.0 (q,  $J$  = 28.4 Hz), 28.4, 19.5.  $^{19}\text{F}$  NMR (377 MHz, Chloroform-*d*)  $\delta$  -64.45. HR-MS (ESI)  $m/z$ :  $[\text{M}+\text{H}]^+$  Calcd for  $\text{C}_{17}\text{H}_{22}\text{F}_3\text{N}_2\text{O}_2\text{S}^+$  375.1349, found: 375.1342. IR  $\nu_{\text{max}}$  (film,  $\text{cm}^{-1}$ ): 3355, 2978, 1705, 1504, 1366, 1248, 1159, 759, 709.

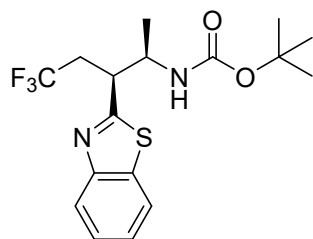

**tert-butyl ((2R,3S)-3-(benzo[d]thiazol-2-yl)-5,5,5-trifluoropentan-2-yl)carbamate (3v'2)**: Silica gel column chromatography (petroleum ether/acetone = 15:1), colorless oil; 1.5 mg, yield = 4%;  $^1\text{H}$  NMR (600 MHz, Chloroform-*d*)  $\delta$  8.01 (d,  $J$  = 8.2 Hz, 1H), 7.88 (d,  $J$  = 7.9 Hz, 1H), 7.49



(t,  $J = 7.7$  Hz, 1H), 7.40 (t,  $J = 7.6$  Hz, 1H), 4.56 (s, 1H), 4.09 (s, 1H), 3.71 (s, 1H), 3.16 – 2.94 (m, 1H), 2.70 – 2.50 (m, 1H), 1.47 (s, 9H), 1.12 (d,  $J = 6.5$  Hz, 3H).  $^{13}\text{C}$  NMR (151 MHz, Chloroform-*d*)  $\delta$  169.0, 155.1, 153.0, 134.9, 126.4 (q,  $J = 275$  Hz), 126.2, 125.3, 123.1, 121.6, 80.0, 49.8, 43.4, 36.2 (q,  $J = 28.2$  Hz), 28.4, 17.2.  $^{19}\text{F}$  NMR (565 MHz, Chloroform-*d*)  $\delta$  -64.33. HR-MS (ESI)  $m/z$ :  $[\text{M}+\text{H}]^+$  Calcd for  $\text{C}_{17}\text{H}_{22}\text{F}_3\text{N}_2\text{O}_2\text{S}^+$  375.1349, found: 375.1342. IR  $\nu_{\text{max}}$  (film,  $\text{cm}^{-1}$ ): 3332, 2979, 1691, 1504, 1366, 1250, 1126, 758, 645.

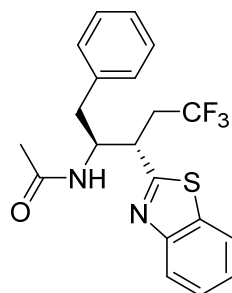

***N*-((2*S*,3*S*)-3-(benzo[*d*]thiazol-2-yl)-5,5,5-trifluoro-1-phenylpentan-2-yl)acetamide (3w)**: Silica gel column chromatography (petroleum ether/acetone = 5:1), colorless oil; 43.1 mg, yield = 55%, 90:10 er.  $[\alpha]_{\text{D}}^{20.0} = -16.00$  ( $c = 0.3$  in acetone,  $\lambda = 589$  nm).  $^1\text{H}$  NMR (400 MHz,  $\text{CDCl}_3$ )  $\delta$  8.09 (d,  $J = 8.1$  Hz, 1H), 7.96 (d,  $J = 7.6$  Hz, 1H), 7.66 – 7.54 (m, 1H), 7.53 – 7.45 (m, 1H), 7.39 – 7.31 (m, 3H), 7.30 – 7.18 (m, 3H), 4.75 (tdd,  $J = 9.3, 6.2, 3.2$  Hz, 1H), 3.00 – 2.87 (m, 1H), 2.82 (dd,  $J = 14.1, 6.3$  Hz, 1H), 2.71 – 2.59 (m, 1H), 2.55 (dd,  $J = 14.0, 9.0$  Hz, 1H), 2.12 (s, 3H).  $^{13}\text{C}\{^1\text{H}\}$  NMR (101 MHz,  $\text{CDCl}_3$ )  $\delta$  170.0, 169.4, 153.1, 137.1, 134.4, 129.1, 128.7, 126.9, 126.5, 126.1 ( $J = 276$  Hz), 125.7, 123.1, 121.8, 54.0, 39.7, 38.6 (q,  $J = 2.5$  Hz), 38.1 (q,  $J = 28.5$  Hz), 23.6.  $^{19}\text{F}$  NMR (377 MHz,  $\text{CDCl}_3$ )  $\delta$  -64.20. (ESI)  $m/z$ :  $[\text{M}+\text{H}]^+$  Calcd for  $\text{C}_{20}\text{H}_{20}\text{F}_3\text{N}_2\text{OS}^+$  393.1243, found: 393.1238. IR  $\nu_{\text{max}}$  (film,  $\text{cm}^{-1}$ ): 3279, 2930, 1653, 1516, 1436, 1257, 1143, 1056, 760, 700. The enantioselectivity was determined by UPCC (Chiralcel OX-3, gradient 100%  $\text{CO}_2$  to  $\text{CO}_2/\text{MeOH} = 70:30$  in 0-20<sup>th</sup> min, flow rate: 0.2 mL/min,  $\lambda = 254$  nm),  $t_{\text{R}}$  (major) = 16.8 min,  $t_{\text{R}}$ (minor) = 17.5 min.

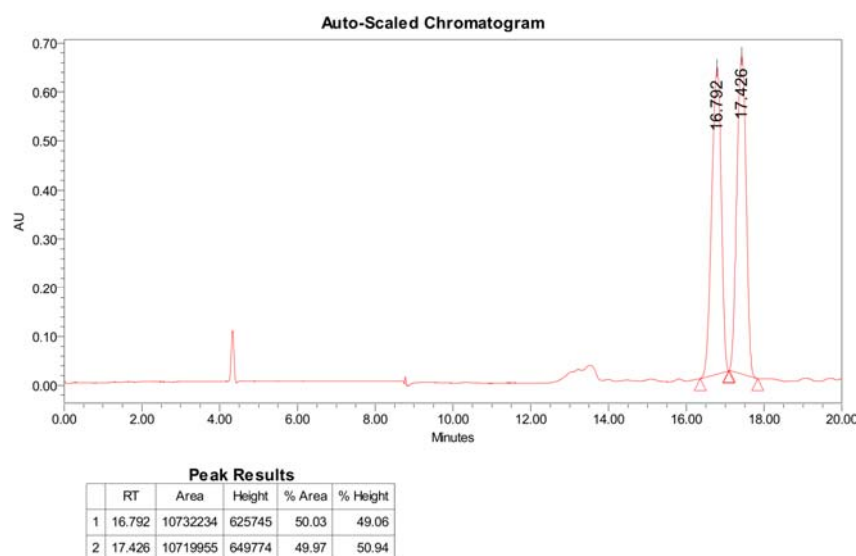

**Figure S13.** Chromatograms of Racemic **3w**

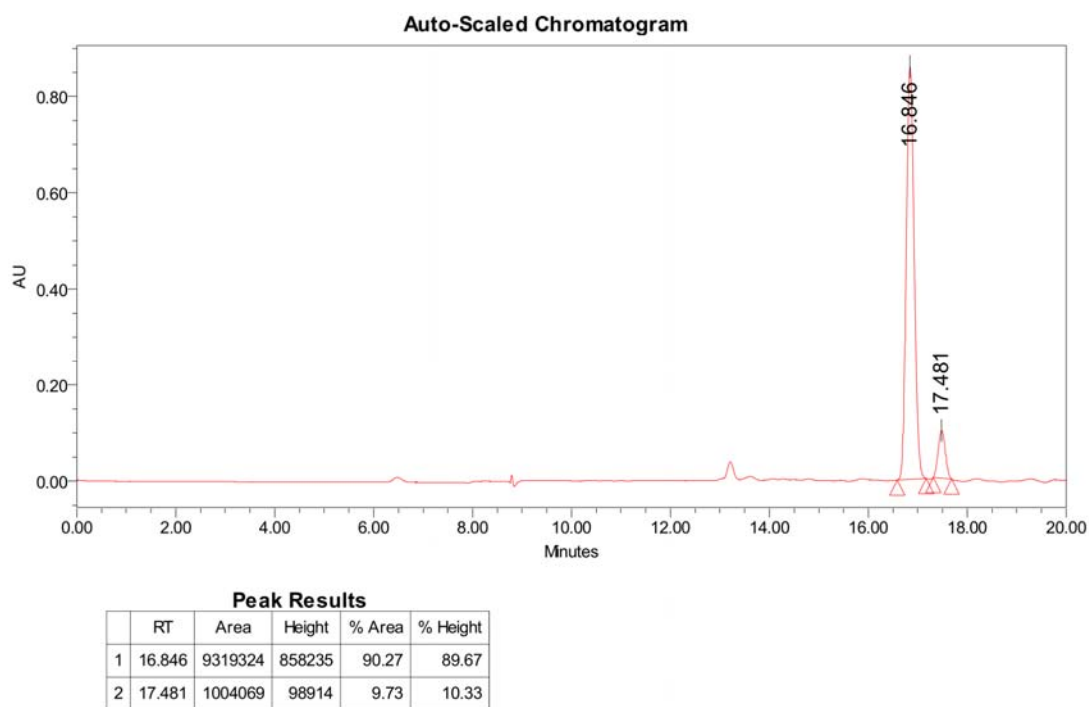

**Figure S14.** Chromatograms of product **3w**

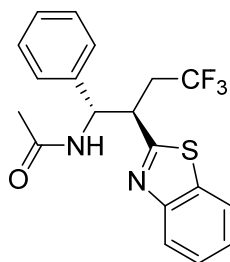

***N*-((1*S*,2*R*)-2-(benzo[*d*]thiazol-2-yl)-4,4,4-trifluoro-1-phenylbutyl)acetamide (**3x**):** Silica gel column chromatography (petroleum ether/acetone = 5:1), white solid; 30.2 mg, yield = 40%, 98:2 er,  $[\alpha]_D^{20.0} = -22.67$  ( $c = 0.3$  in acetone,  $\lambda = 589$  nm).  $^1\text{H}$  NMR (400 MHz,  $\text{CDCl}_3$ )  $\delta$  8.06 (d,  $J = 8.1$  Hz, 1H), 7.75 (d,  $J = 8.1$  Hz, 1H), 7.68 (d,  $J = 8.9$  Hz, 1H), 7.57 – 7.44 (m, 1H), 7.44 – 7.33 (m, 1H), 7.18 (qd,  $J = 4.3, 1.6$  Hz, 3H), 7.05 – 6.95 (m, 2H), 5.57 (dd,  $J = 9.1, 4.4$  Hz, 1H), 3.83 (dt,  $J = 8.8, 4.1$  Hz, 1H), 3.05 (m, 1H), 2.77 (m, 1H), 2.14 (s, 3H).  $^{13}\text{C}\{^1\text{H}\}$  NMR (101 MHz,  $\text{CDCl}_3$ )  $\delta$  169.8, 169.2, 152.8, 139.4, 134.4, 128.6, 127.7, 126.3, 126.1 (q,  $J = 275$  Hz), 125.5, 124.8, 122.9, 121.7, 56.1, 43.2 (q,  $J = 2.5$  Hz), 38.0 (q,  $J = 28.8$  Hz), 23.5.  $^{19}\text{F}$  NMR (376 MHz,  $\text{CDCl}_3$ )  $\delta$  -64.37. (ESI)  $m/z$ :  $[\text{M}+\text{H}]^+$  Calcd for  $\text{C}_{19}\text{H}_{18}\text{F}_3\text{N}_2\text{OS}^+$  379.1087, found: 379.1084. IR  $\nu_{\text{max}}$  (film,  $\text{cm}^{-1}$ ): 3299, 2922, 1651, 1511, 1436, 1256, 1125, 759, 701. The enantioselectivity was determined by UPCC (Trefoil CEL1, gradient 100%  $\text{CO}_2$  to  $\text{CO}_2/\text{MeOH} = 80:20$  in 0-10<sup>th</sup> min, flow rate: 0.5 mL/min,  $\lambda = 254$  nm),  $t_R$  (major) = 8.1 min,  $t_R$  (minor) = 7.8 min.

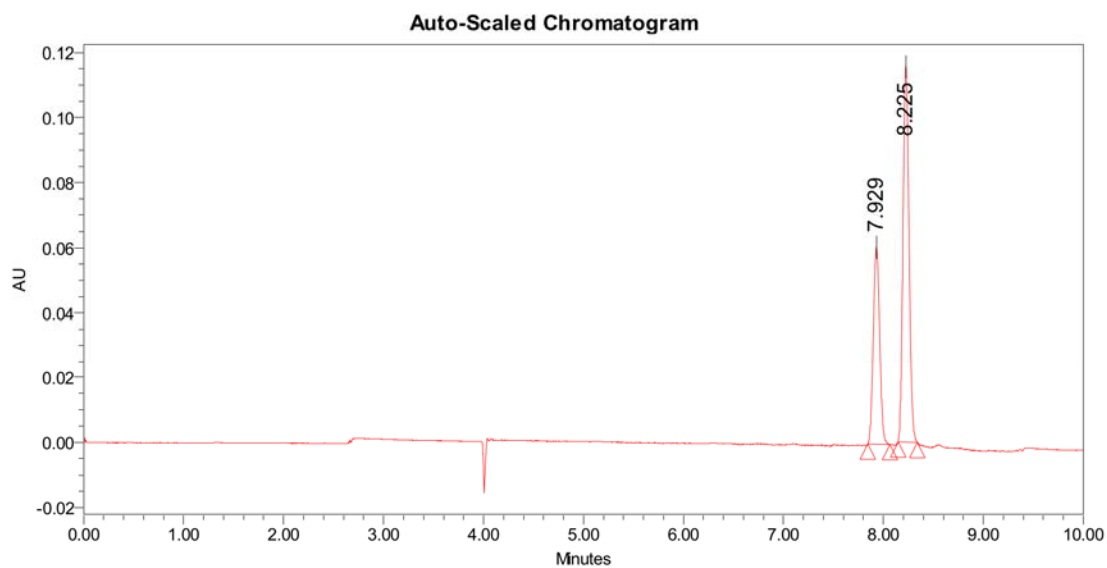

**Peak Results**

|   | RT    | Area   | Height | % Area | % Height |
|---|-------|--------|--------|--------|----------|
| 1 | 7.929 | 264332 | 60832  | 35.81  | 34.45    |
| 2 | 8.225 | 473810 | 115752 | 64.19  | 65.55    |

**Figure S15.** Chromatograms of Racemic **3x**

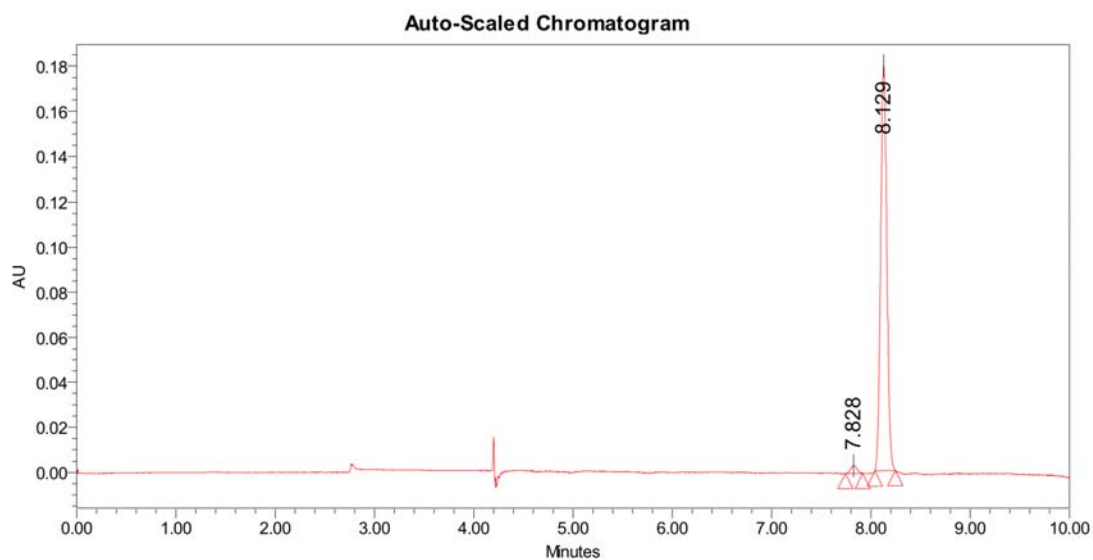

**Peak Results**

|   | RT    | Area   | Height | % Area | % Height |
|---|-------|--------|--------|--------|----------|
| 1 | 7.828 | 14450  | 3454   | 1.80   | 1.89     |
| 2 | 8.129 | 788206 | 179433 | 98.20  | 98.11    |

**Figure S16.** Chromatograms of product **3x**

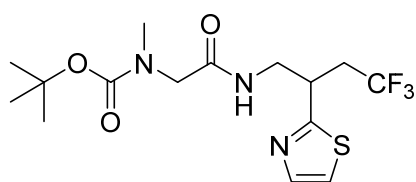

**tert-butyl methyl(2-oxo-2-((4,4,4-trifluoro-2-(thiazol-2-yl)butyl)amino)ethyl)carbamate (3y):**

Silica gel column chromatography (petroleum ether/acetone = 4:1), light yellow solid; 54.9 mg, yield = 72%;  $^1\text{H}$  NMR (400 MHz,  $\text{CDCl}_3$ )  $\delta$  7.75 (d,  $J$  = 3.2 Hz, 1H), 7.28 (d,  $J$  = 3.3 Hz, 1H), 6.98 (s, 1H), 4.12 – 3.68 (m, 4H), 3.61 (dd,  $J$  = 8.4, 5.0 Hz, 1H), 2.87 (s, 3H), 2.82 – 2.66 (m, 1H), 2.55 (ddt,  $J$  = 15.1, 10.5, 5.2 Hz, 1H), 1.42 (s, 9H).  $^{13}\text{C}\{^1\text{H}\}$  NMR (101 MHz,  $\text{CDCl}_3$ )  $\delta$  169.9, 169.5, 155.5, 142.8, 126.0 (q,  $J$  = 277.0 Hz), 119.0, 80.7, 53.0, 43.1, 37.1, 36.8, 35.8, 28.2.  $^{19}\text{F}$  NMR (376 MHz,  $\text{CDCl}_3$ )  $\delta$  -64.13. (ESI)  $m/z$ :  $[\text{M}+\text{H}]^+$  Calcd for  $\text{C}_{15}\text{H}_{23}\text{F}_3\text{N}_3\text{O}_3\text{S}^+$  382.1407, found: 382.1402. IR  $\nu_{\text{max}}$  (film,  $\text{cm}^{-1}$ ): 3312, 2971, 1667, 1649, 1535, 1290, 1251, 1145, 1056, 879, 726.

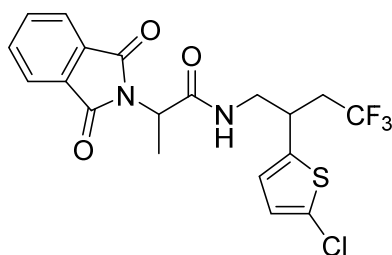

***N*-(2-(5-chlorothiophen-2-yl)-4,4,4-trifluorobutyl)-2-(1,3-dioxoisindolin-2-yl)propanamide (3z):**

Silica gel column chromatography (petroleum ether/acetone = 5:1), white solid; 53.3 mg, yield = 60%, 7:3 dr;  $^1\text{H}$  NMR (400 MHz,  $\text{CDCl}_3$ )  $\delta$  7.87 – 7.80 (m, 2H), 7.75 (m, 2H), 6.61 (d,  $J$  = 3.7 Hz, 1H), 6.55 (dd,  $J$  = 6.0, 3.8 Hz, 1H), 6.31–6.05 (m, 1H), 4.85 (p,  $J$  = 7.2 Hz, 1H), 3.71 (m, 0.7H), 3.58 (m, 0.3H), 3.40 (m, 1.3H), 3.25 (m, 0.7H), 2.58 – 2.28 (m, 2H), 1.63 (m, 3H).  $^{13}\text{C}\{^1\text{H}\}$  NMR (101 MHz,  $\text{CDCl}_3$ )  $\delta$  169.7, 169.5, 167.8, 167.7, 142.1, 142.0, 134.5, 134.4, 131.7, 128.7, 125.9 (q,  $J$  = 276 Hz), 125.9, 125.9, 125.0, 123.6, 123.6, 49.5, 49.3, 45.1, 44.91, 38.2 (q,  $J$  = 28.5 Hz), 38.0 (q,  $J$  = 28.6 Hz), 36.0 (q,  $J$  = 2.6 Hz), 35.9 (q,  $J$  = 2.5 Hz), 15.11, 14.97.  $^{19}\text{F}$  NMR (376 MHz,  $\text{CDCl}_3$ )  $\delta$  -63.83. (ESI)  $m/z$ :  $[\text{M}+\text{H}]^+$  Calcd for  $\text{C}_{19}\text{H}_{17}\text{ClF}_3\text{N}_2\text{O}_3\text{S}^+$  445.0595, found: 445.0592. IR  $\nu_{\text{max}}$  (film,  $\text{cm}^{-1}$ ): 3314, 2928, 1715, 1661, 1538, 1386, 1255, 1140, 798, 720.

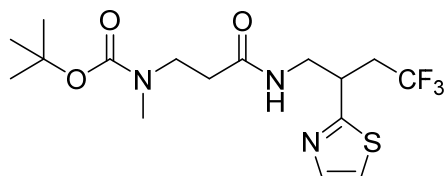

**tert-butyl methyl(3-oxo-3-((4,4,4-trifluoro-2-(thiazol-2-yl)butyl)amino)propyl)carbamate (3z1):**

Silica gel column chromatography (petroleum ether/acetone = 4:1), colorless oil; 59.3 mg, yield = 75%;  $^1\text{H}$  NMR (400 MHz,  $\text{CDCl}_3$ )  $\delta$  7.80 – 7.74 (m, 1H), 7.29 (d,  $J$  = 2.4 Hz, 1H), 6.97 (s, 1H), 3.85 – 3.57 (m, 3H), 3.55 – 3.32 (m, 2H), 2.85 (s, 3H), 2.76 (m, 1H), 2.57 (m, 1H), 2.44 (s, 2H), 1.44 (s, 9H).  $^{13}\text{C}\{^1\text{H}\}$  NMR (101 MHz,  $\text{CDCl}_3$ )  $\delta$  171.4, 169.5, 156.5, 142.8, 126.1 (q,  $J$  = 277.3 Hz), 119.0, 79.9, 45.3, 43.6, 37.1 (q,  $J$  = 2.6 Hz), 36.6 (d,  $J$  = 29.0 Hz), 35.3, 34.8, 28.4.  $^{19}\text{F}$  NMR (376 MHz,  $\text{CDCl}_3$ )  $\delta$  -64.14. (ESI)  $m/z$ :  $[\text{M}+\text{H}]^+$  Calcd for  $\text{C}_{16}\text{H}_{25}\text{F}_3\text{N}_3\text{O}_3\text{S}^+$  396.1563, found: 396.1558. IR  $\nu_{\text{max}}$  (film,  $\text{cm}^{-1}$ ): 3291, 2971, 1654, 1552, 1366, 1255, 1130, 725, 596.

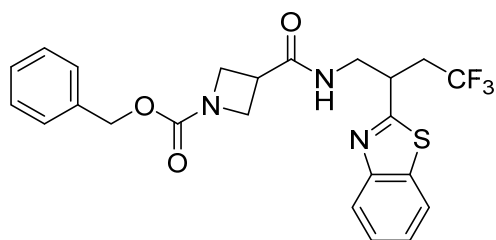

**benzyl 3-((2-(benzo[d]thiazol-2-yl)-4,4,4-trifluorobutyl)carbamoyl)azetidene-1-carboxylate (3z2):** Silica gel column chromatography (petroleum ether/acetone = 4:1), colorless oil; 68.7 mg, yield = 72%;  $^1\text{H}$  NMR (400 MHz,  $\text{CDCl}_3$ )  $\delta$  7.99 (d,  $J = 8.1$  Hz, 1H), 7.87 (d,  $J = 8.0$  Hz, 1H), 7.49 (t,  $J = 7.7$  Hz, 1H), 7.44 – 7.38 (t,  $J = 7.7$  Hz, 1H), 7.34 (m, 5H), 6.60 (s, 1H), 5.06 (s, 2H), 4.14 (s, 2H), 4.05 (m, 2H), 3.78 (m, 3H), 3.16 (p,  $J = 8.5$  Hz, 1H), 2.90 (m, 1H), 2.63 (m, 1H).  $^{13}\text{C}\{^1\text{H}\}$  NMR (101 MHz,  $\text{CDCl}_3$ )  $\delta$  172.0, 170.3, 156.3, 152.9, 136.4, 134.6, 128.5, 128.1, 127.9, 126.5, 126.0 (q,  $J = 275$  Hz), 125.6, 122.9, 121.8, 66.8, 51.8, 43.4, 38.0 (q,  $J = 2.7$  Hz), 36.8 (q,  $J = 29.1$  Hz), 33.6.  $^{19}\text{F}$  NMR (376 MHz,  $\text{CDCl}_3$ )  $\delta$  -64.02. (ESI)  $m/z$ :  $[\text{M}+\text{H}]^+$  Calcd for  $\text{C}_{23}\text{H}_{23}\text{F}_3\text{N}_3\text{O}_3\text{S}^+$  478.1407, found: 478.1403. IR  $\nu_{\text{max}}$  (film,  $\text{cm}^{-1}$ ): 3300, 2987, 1683, 1655, 1546, 1435, 1256, 1128, 759, 701.

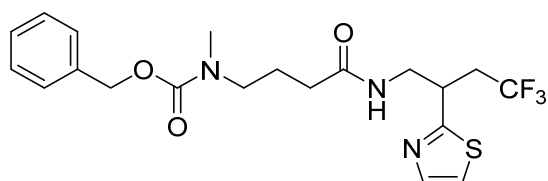

**benzyl methyl(4-oxo-4-((4,4,4-trifluoro-2-(thiazol-2-yl)butyl)amino)butyl)carbamate (3z3):** Silica gel column chromatography (petroleum ether/acetone = 4:1), colorless oil; 61.1 mg, yield = 69%;  $^1\text{H}$  NMR (400 MHz,  $\text{CDCl}_3$ )  $\delta$  7.76 (d,  $J = 3.1$  Hz, 1H), 7.35 (m, 5H), 7.27 (d,  $J = 3.1$  Hz, 1H), 6.93 (s, 0.64H), 6.17 (s, 0.36H), 5.10 (s, 2H), 3.69 (m, 3H), 3.29 (t,  $J = 6.7$  Hz, 2H), 2.90 (s, 3H), 2.78 (m, 1H), 2.61 (m, 1H), 2.13 (m, 2H), 1.83 (p,  $J = 6.9$  Hz, 2H).  $^{13}\text{C}\{^1\text{H}\}$  NMR (101 MHz,  $\text{CDCl}_3$ )  $\delta$  173.1, 172.5, 169.8, 156.9, 156.2, 142.7, 136.8, 130.2, 128.5, 128.0, 127.9, 127.8, 126.2 (q,  $J = 274$  Hz), 119.0, 67.1, 48.0, 43.7, 43.6, 37.3, 36.7 (q,  $J = 28.2$  Hz), 34.6, 33.9, 33.1, 23.5.  $^{19}\text{F}$  NMR (376 MHz,  $\text{CDCl}_3$ )  $\delta$  -64.07. (ESI)  $m/z$ :  $[\text{M}+\text{H}]^+$  Calcd for  $\text{C}_{20}\text{H}_{24}\text{F}_3\text{N}_3\text{O}_3\text{S}^+$  444.1563, found: 444.1558. IR  $\nu_{\text{max}}$  (film,  $\text{cm}^{-1}$ ): 3288, 2956, 1679, 1534, 1653, 1404, 1256, 1129, 1055, 767, 697.

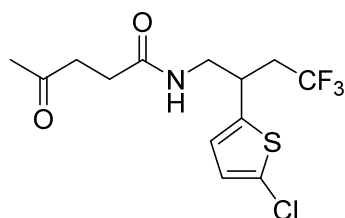

***N*-2-(5-chlorothiophen-2-yl)-4,4,4-trifluorobutyl-4-oxopentanamide (3z4):** Silica gel column chromatography (petroleum ether/acetone = 10:1), yellow oil; 43.0 mg, yield = 63%;  $^1\text{H}$  NMR (400 MHz,  $\text{CDCl}_3$ )  $\delta$  6.76 (d,  $J = 3.8$  Hz, 1H), 6.69 (d,  $J = 3.7$  Hz, 1H), 5.92 (s, 1H), 3.63 (dt,  $J = 13.0$ , 6.3 Hz, 1H), 3.39 (ddd,  $J = 13.6$ , 8.1, 5.6 Hz, 2H), 3.26 (m, 1H), 2.77 (t,  $J = 6.3$  Hz, 2H), 2.53 – 2.40 (m, 2H), 2.36 (t,  $J = 6.4$  Hz, 2H), 2.16 (s, 3H).  $^{13}\text{C}\{^1\text{H}\}$  NMR (101 MHz,  $\text{CDCl}_3$ )  $\delta$  207.8, 172.3, 142.3, 128.7, 126.0, 126.0 (q,  $J = 277$  Hz), 124.9, 44.9, 38.5, 38.2 (q,  $J = 28.4$  Hz), 36.0 (q,  $J = 2.7$  Hz), 29.9, 29.8.  $^{19}\text{F}$  NMR (376 MHz,  $\text{CDCl}_3$ )  $\delta$  -63.84. (ESI)  $m/z$ :  $[\text{M}+\text{H}]^+$  Calcd for  $\text{C}_{13}\text{H}_{16}\text{ClF}_3\text{N}_1\text{O}_2\text{S}^+$  342.0537, found: 342.0536. IR  $\nu_{\text{max}}$  (film,  $\text{cm}^{-1}$ ): 3312, 2972, 1705, 1665, 1550, 1406, 1251, 1056, 892, 797.

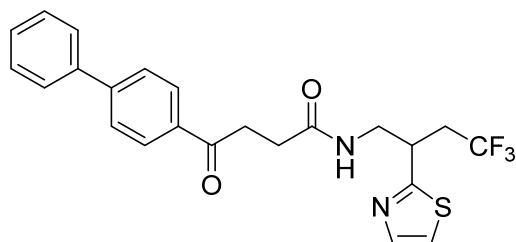

**4-([1,1'-biphenyl]-4-yl)-4-oxo-N-(4,4,4-trifluoro-2-(thiazol-2-yl)butyl)butanamide (3z5):** Silica gel column chromatography (petroleum ether/acetone = 4:1), yellow solid; 60.7 mg, yield = 68%;  $^1\text{H}$  NMR (400 MHz,  $\text{CDCl}_3$ )  $\delta$  8.05 (d,  $J = 8.3$  Hz, 2H), 7.80 (d,  $J = 3.3$  Hz, 1H), 7.70 (d,  $J = 8.3$  Hz, 2H), 7.64 (d,  $J = 7.4$  Hz, 2H), 7.48 (t,  $J = 7.5$  Hz, 2H), 7.41 (t,  $J = 7.2$  Hz, 1H), 7.28 (d,  $J = 3.1$  Hz, 1H), 6.62 (t,  $J = 5.5$  Hz, 1H), 3.85 – 3.77 (m, 1H), 3.78 – 3.63 (m, 2H), 3.39 (t,  $J = 6.5$  Hz, 2H), 2.89 – 2.75 (m, 1H), 2.71 – 2.57 (m, 3H).  $^{13}\text{C}\{^1\text{H}\}$  NMR (101 MHz,  $\text{CDCl}_3$ )  $\delta$  198.4, 172.7, 170.2, 146.0, 142.7, 139.8, 135.2, 129.0, 128.8, 128.7, 128.3, 127.3, 126.1 (q,  $J = 275$  Hz), 119.1, 43.7, 37.3 (q,  $J = 2.5$  Hz), 37.0 (q,  $J = 28.8$  Hz), 34.0, 30.2.  $^{19}\text{F}$  NMR (376 MHz,  $\text{CDCl}_3$ )  $\delta$  -64.04. (ESI)  $m/z$ :  $[\text{M}+\text{H}]^+$  Calcd for  $\text{C}_{23}\text{H}_{22}\text{F}_3\text{N}_2\text{O}_2\text{S}^+$  447.1347, found: 447.1346. IR  $\nu_{\text{max}}$  (film,  $\text{cm}^{-1}$ ): 3297, 2974, 1673, 1603, 1535, 1252, 1127, 1065, 762, 695.

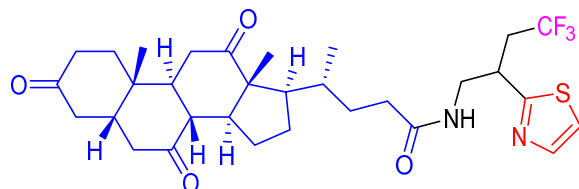

**(4R)-4-((5S,8R,9R,10S,13R,14S,17R)-13-methyl-3,7,12-trioxohexadecahydro-1H-cyclopenta[a]phenanthren-17-yl)-N-(4,4,4-trifluoro-2-(thiazol-2-yl)butyl)pentanamide (3z6):** Silica gel column chromatography (petroleum ether/acetone = 4:1), white solid; 83.2 mg, yield = 70%, 84:16 dr;  $^1\text{H}$  NMR (400 MHz,  $\text{CDCl}_3$ )  $\delta$  7.75 (d,  $J = 1.7$  Hz, 1H), 7.28 (d,  $J = 2.0$  Hz, 1H), 6.33 (s, 1H), 3.77 – 3.67 (m, 1H), 3.67 – 3.53 (m, 2H), 2.98 – 2.65 (m, 4H), 2.53 (m, 1H), 2.39 – 2.03 (m, 11H), 2.03 – 1.89 (m, 4H), 1.84 – 1.72 (m, 2H), 1.58 (m, 1H), 1.36 (s, 3H), 1.27 (m, 3H), 1.02 (s, 3H), 0.78 (m, 3H).  $^{13}\text{C}\{^1\text{H}\}$  NMR (101 MHz,  $\text{CDCl}_3$ )  $\delta$  212.1, 209.2, 208.8, 173.9, 170.1, 142.7, 126.1 (q,  $J = 277.2$  Hz), 119.1, 56.9, 51.8, 49.0, 46.8, 45.6, 45.5, 45.0, 43.6, 42.8, 38.6, 37.3 (d,  $J = 2.6$  Hz), 37.0 (d,  $J = 28.6$  Hz), 36.4, 36.0, 35.4, 35.2, 33.4, 31.0, 27.6, 25.1, 21.9, 18.7, 11.8.  $^{19}\text{F}$  NMR (376 MHz,  $\text{CDCl}_3$ )  $\delta$  -64.07. (ESI)  $m/z$ :  $[\text{M}+\text{H}]^+$  Calcd for  $\text{C}_{31}\text{H}_{42}\text{F}_3\text{N}_2\text{O}_4\text{S}^+$  595.2812, found: 595.2809. IR  $\nu_{\text{max}}$  (film,  $\text{cm}^{-1}$ ): 3310, 2970, 1706, 1654, 1540, 1382, 1256, 1129, 1052, 892, 768, 532. the diastereo ratio (dr) was determined by UPCC (viridis® BEH 2-ethylpyridine 1.7  $\mu\text{m}$ ,  $\text{CO}_2/\text{MeOH} = 90:10$ , flow rate: 0.5 mL/min,  $\lambda = 254$  nm),  $t_{\text{R}}$  (major) = 8.2 min,  $t_{\text{R}}$  (minor) = 6.8 min;

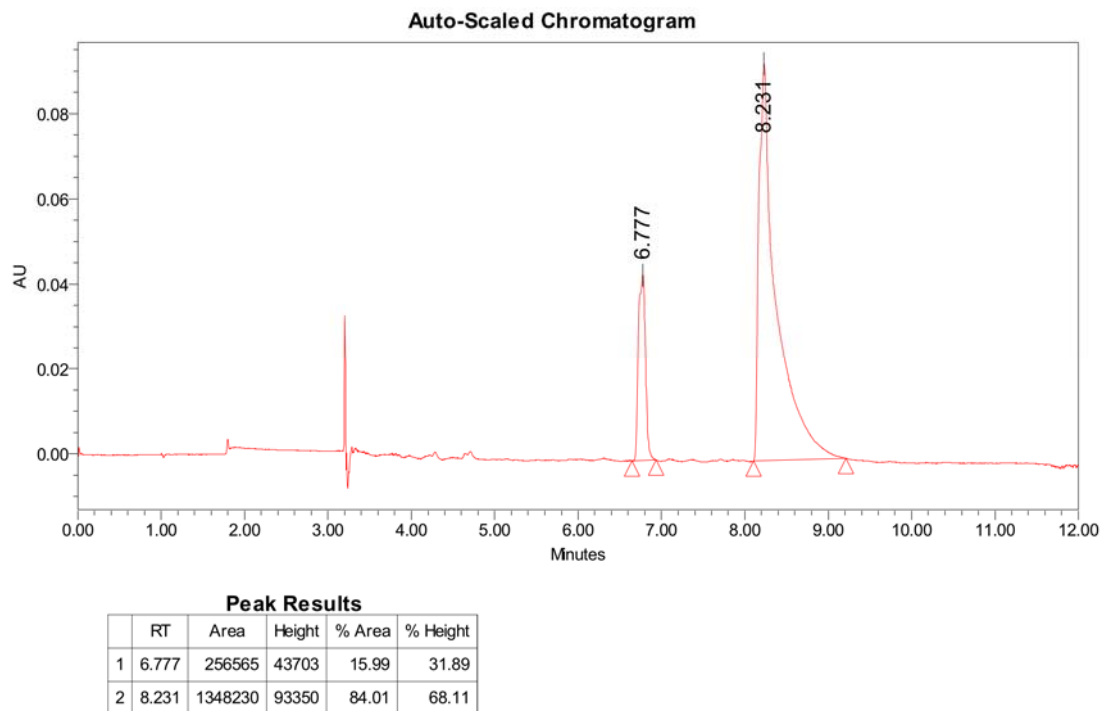

**Figure S17.** Chromatograms of **3z6**

## 7. Product transformation

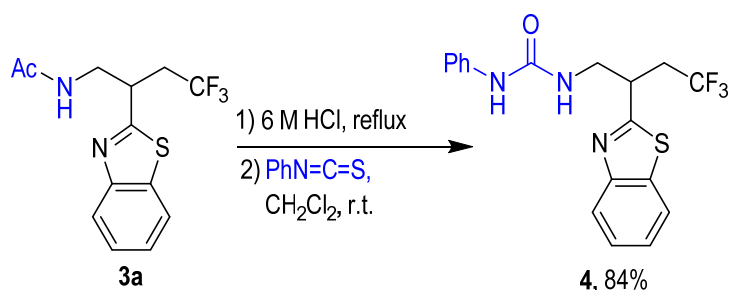

6M HCl (1.5 mL) was added to a solution of *N*-(2-(benzo[d]thiazol-2-yl)-4,4,4-trifluorobutyl)acetamide (**3a**, 30.2 mg, 0.1 mmol) in ethanol (0.5 mL) and the reaction mixture was stirred reflux until the starting material was disappeared (reaction monitored by TLC). The reaction mixture was cooled to room temperature, the solution was basified to 14 with 15% NaOH and then extracted with CH<sub>2</sub>Cl<sub>2</sub> three times. The combined organic layers were dried over Na<sub>2</sub>SO<sub>4</sub> and concentrated in *vacuo*. The corresponding amine was dissolved in anhydrous CH<sub>2</sub>Cl<sub>2</sub> (2 mL), phenyl isocyanate (17.9 mg, 0.15 mmol) was added and the solution was stirred at room temperature overnight. The organic layers concentrated in *vacuo*. The crude mixture was purified via silica gel column chromatography to afford the desired product **1-(2-(benzo[d]thiazol-2-yl)-4,4,4-trifluorobutyl)-3-phenylthiourea (4)**: Silica gel column chromatography (petroleum ether/acetone = 5:1), yellow oil; 33.2 mg, yield = 84% over two steps; <sup>1</sup>H NMR (400 MHz, CDCl<sub>3</sub>) δ 8.06 (s, 1H), 7.92 – 7.86 (m, 1H), 7.74 (d, *J* = 8.0 Hz, 1H), 7.53 – 7.47 (m, 1H), 7.46 – 7.40 (m, 1H), 7.29 – 7.22 (m, 3H), 7.07 – 7.01 (m, 2H), 6.99 (t, *J* = 5.4 Hz, 1H), 4.29 – 4.13 (m, 2H), 3.98 (tt, *J* = 7.9, 4.7 Hz,

1H), 2.85 (m, 1H), 2.73 (m, 1H).  $^{13}\text{C}\{^1\text{H}\}$  NMR (101 MHz,  $\text{CDCl}_3$ )  $\delta$  181.0, 170.6, 126.0 (q,  $J = 275$  Hz), 152.8, 135.6, 134.5, 130.1, 127.5, 126.3, 125.5, 125.4, 122.9, 121.7, 48.5, 37.4 (q,  $J = 2.3$  Hz), 37.1 (q,  $J = 29.1$  Hz).  $^{19}\text{F}$  NMR (377 MHz,  $\text{CDCl}_3$ )  $\delta$  -63.93. HR-MS (ESI)  $m/z$ :  $[\text{M}+\text{H}]^+$  Calcd for  $\text{C}_{18}\text{H}_{17}\text{F}_3\text{N}_3\text{S}_2^+$  396.0810, found: 396.0811. IR  $\nu_{\text{max}}$  (film,  $\text{cm}^{-1}$ ): 3211, 2970, 1534, 1497, 1251, 1076, 760.

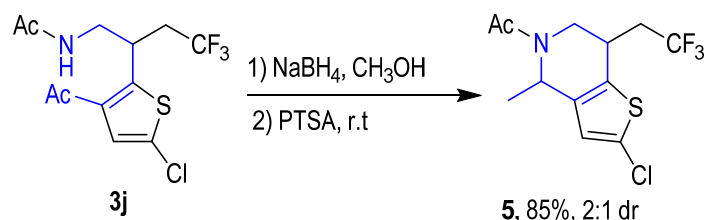

$\text{NaBH}_4$  (15.2 mg, 0.4 mmol) was added portionwise to a solution of *N*-(2-(3-acetyl-5-chlorothiophen-2-yl)-4,4,4-trifluorobutyl)acetamide (**3j**, 65.4 mg, 0.2 mmol) in methanol (1.0 mL). The solution was stirred 1 h at room temperature. Then the solvent was removed under vacuum. The residue was dissolved in  $\text{CH}_2\text{Cl}_2$  and water (2 mL) was added dropwise. The solution was extracted with  $\text{CH}_2\text{Cl}_2$  three times. The combined organic layers were dried over  $\text{Na}_2\text{SO}_4$  and concentrated in *vacuo*. The corresponding compound was dissolved in  $\text{CH}_2\text{Cl}_2$  and *p*-Toluenesulfonic acid (34 mg, 0.2 mmol) was added. The solution was stirred at room temperature until the starting material disappeared. The organic layers concentrated in *vacuo*. The crude mixture was purified via silica gel column chromatography to afford the desired product **1-(2-chloro-4-methyl-7-(2,2,2-trifluoroethyl)-6,7-dihydrothieno[3,2-c]pyridin-5(4H)-yl)ethan-1-one (5)**: Silica gel column chromatography (petroleum ether/acetone = 10:1), yellow oil; 52.9 mg, yield = 85% over two steps;  $^1\text{H}$  NMR (400 MHz,  $\text{CDCl}_3$ )  $\delta$  6.62 (s, 1H), 5.48 (q,  $J = 6.6$  Hz, 0.66H), 5.05 (dd,  $J = 13.0, 5.1$  Hz, 0.34H), 4.78 (q,  $J = 6.5$  Hz, 0.34H), 4.11 (dd,  $J = 13.6, 4.4$  Hz, 0.66H), 3.40 – 3.18 (m, 1H), 3.14 (dd,  $J = 13.5, 11.0$  Hz, 0.66H), 2.74 – 2.43 (m, 1.35H), 2.28 (m, 1H), 2.14 (s, 3H), 1.44 (d,  $J = 6.7$  Hz, 1H), 1.34 (d,  $J = 6.8$  Hz, 2H).  $^{13}\text{C}\{^1\text{H}\}$  NMR (101 MHz,  $\text{CDCl}_3$ )  $\delta$  168.9, 168.7, 138.8, 137.3, 135.6, 133.3, 129.3, 129.1, 125.9 (q,  $J = 276$  Hz), 125.8 (q,  $J = 276$  Hz), 124.9, 124.2, 50.9, 46.7, 45.1, 39.7, 38.4 (q,  $J = 29$  Hz), 38.2 (q,  $J = 29$  Hz), 31.9 (q,  $J = 2.3$  Hz), 30.8 (q,  $J = 2.4$  Hz), 21.7, 21.4, 20.7, 19.5.  $^{19}\text{F}$  NMR (377 MHz,  $\text{CDCl}_3$ )  $\delta$  -63.31, -63.42. HR-MS (ESI)  $m/z$ :  $[\text{M}+\text{H}]^+$  Calcd for  $\text{C}_{12}\text{H}_{14}\text{ClF}_3\text{NOS}^+$  312.0431, found: 312.0429. IR  $\nu_{\text{max}}$  (film,  $\text{cm}^{-1}$ ): 2973, 1648, 1422, 1250, 1141, 1057, 827, 639.



## 8. Mechanistic Experiments

### a) Radical quench experiment

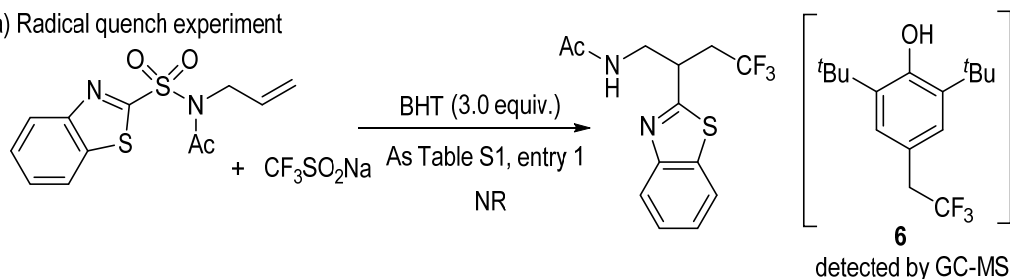

To the 10 mL three-necked round bottom flask with a magnetic stir bar was added the *N*-allylsulfonamide (0.2 mmol),  $\text{CF}_3\text{SO}_2\text{Na}$  (62.4 mg, 0.4 mmol, 2.0 equiv.),  $\text{LiClO}_4$  (63.6 mg, 0.1 M.), Butylated hydroxytoluene (132 mg, 3.0 equiv.) and  $\text{CH}_3\text{CN} : \text{H}_2\text{O}$  (3:1 v/v, 6.0 mL). The flask was equipped with a reticulated vitreous carbon (100 PPI) anode (0.8 cm x 0.8 cm x 1 cm) and a platinum plate (1 cm x 1 cm) cathode. The electrolysis was carried out at rt using a constant current of 10 mA. The reaction mixture was stirred and electrolyzed for 1.08 h (2.0 F per mol of sulfonamide). After the electrolysis, no desired product was obtained (detected by TLC) and we detected 1,3-di-tert-butyl-5-methyl-2-(trifluoromethoxy)benzene **6** by GC-MS.

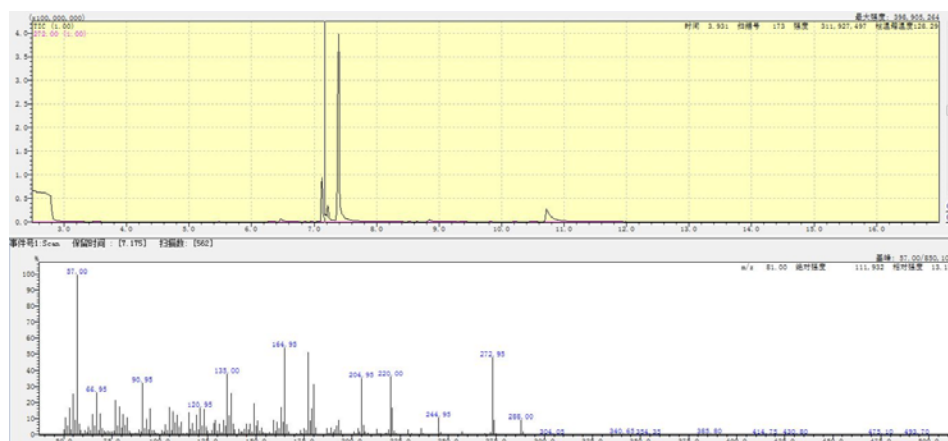

**Figure S18.** GC-MS spectrum of the BHT adducts

### b) Crossover experiment

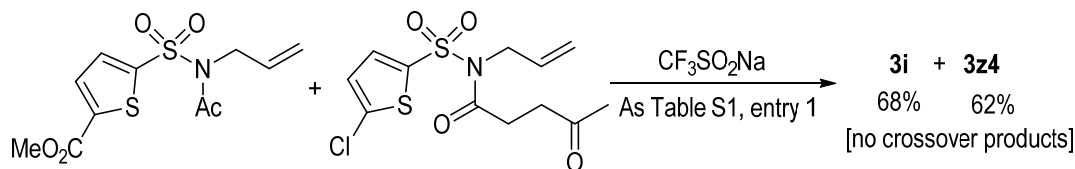

To the 10 mL three-necked round bottom flask with a magnetic stir bar was added the methyl 5-(*N*-acetyl-*N*-allylsulfamoyl)thiophene-2-carboxylate (0.1 mmol), *N*-allyl-*N*-((5-chlorothiophen-2-yl)sulfonyl)-4-oxopentanamide (0.1 mmol),  $\text{CF}_3\text{SO}_2\text{Na}$  (62.4 mg, 0.4 mmol, 2.0 equiv.),  $\text{LiClO}_4$  (63.6 mg, 0.1 M.) and  $\text{CH}_3\text{CN}:\text{H}_2\text{O}$  (3:1 v/v, 6.0 mL). The flask was equipped with a reticulated vitreous carbon (100 PPI) anode (0.8 cm x 0.8 cm x 1 cm) and a platinum plate (1 cm x 1 cm) cathode. The electrolysis was carried out at rt using a constant current of 10 mA. The reaction mixture was stirred and electrolyzed for 1.08 h (2.0 F per mol of sulfonamide). When the reaction was finished, the reaction was quenched with saturated  $\text{NaCl}$  aqueous solution and extracted three times with

ethyl acetate. The combined organic layers were dried over  $\text{Na}_2\text{SO}_4$  and concentrated in *vacuo*. The crude mixture was purified via silica gel column chromatography (10 % acetone/ petroleum ether) to afford the products **9** (21 mg, 68 %) and product **28** (21 mg, 62%). No crossover products were detected.

c) Source of the hydrogen atom for N-H formation

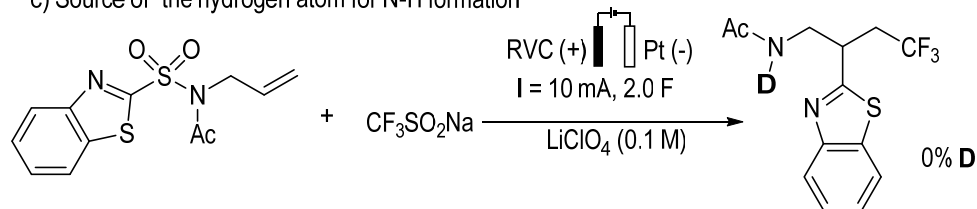

To the 10 mL three-necked round bottom flask with a magnetic stir bar was added the *N*-allylsulfonamide (0.2 mmol, 59.2 mg),  $\text{CF}_3\text{SO}_2\text{Na}$  (62.4 mg, 0.4 mmol, 2.0 equiv.),  $\text{LiClO}_4$  (63.6 mg, 0.1 M.) and  $\text{CD}_3\text{CN}$  (6.0 mL). The flask was equipped with a reticulated vitreous carbon (100 PPI) anode (0.8 cm x 0.8 cm x 1 cm) and a platinum plate (1 cm x 1 cm) cathode. The electrolysis was carried out at rt using a constant current of 10 mA. The reaction mixture was stirred and electrolyzed for 1.08 h (2.0 F per mol of sulfonamide). After the electrolysis, The mixture was concentrated in *vacuo* and check by  $^1\text{H-NMR}$  in  $\text{DMSO-}d_6$ .

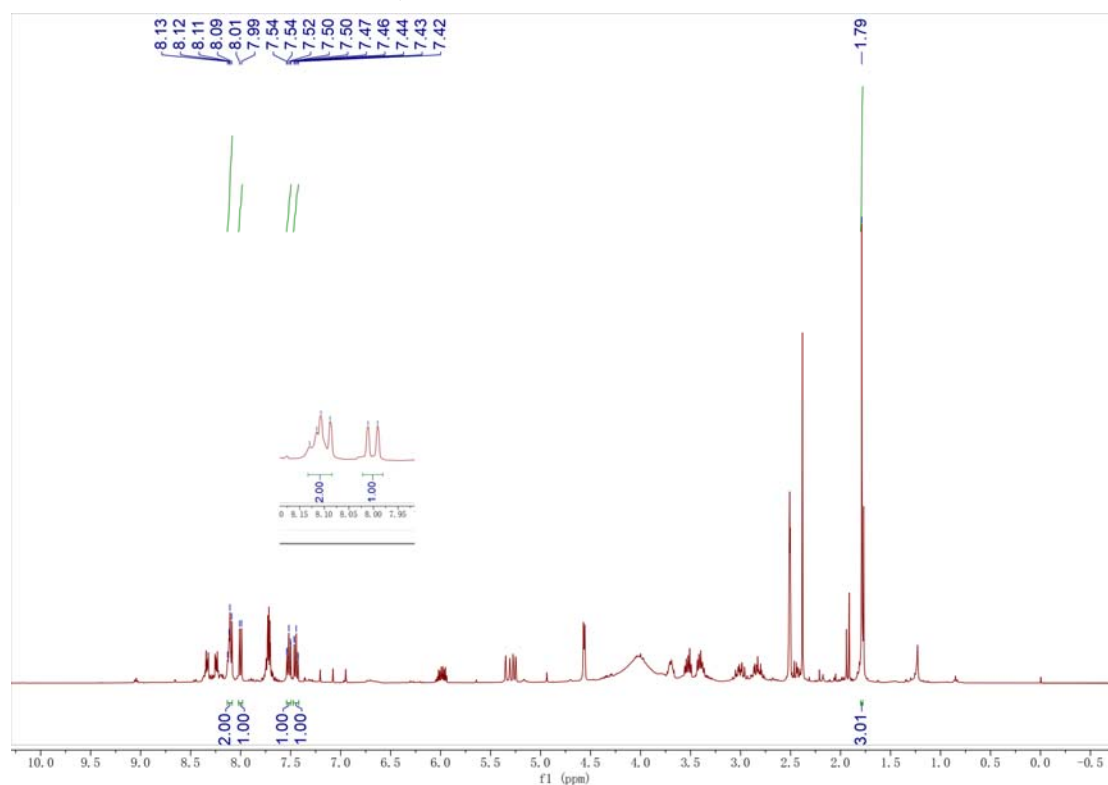

**Figure S19**  $^1\text{H-NMR}$  of reaction mixture

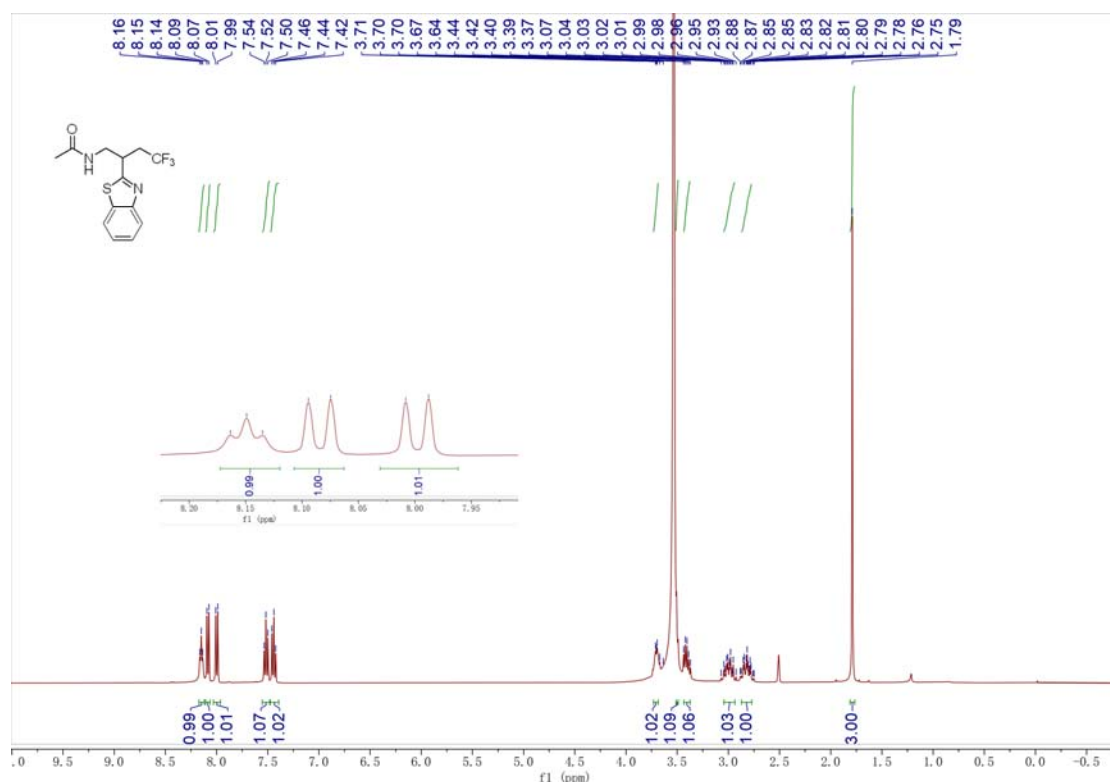

Figure S20  $^1\text{H-NMR}$  of **3a**

d) Divided-cell experiment

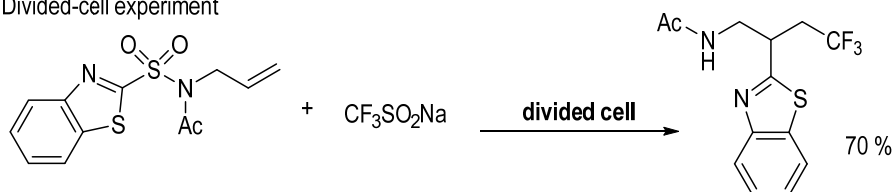

To the anodic cell with a magnetic stir bar was added the *N*-allyl-*N*-(benzo[d]thiazol-2-ylsulfonyl)acetamide (0.2 mmol),  $\text{CF}_3\text{SO}_2\text{Na}$  (62.4 mg, 0.4 mmol, 2.0 equiv.),  $\text{LiClO}_4$  (127.2 mg, 0.1 M.) and  $\text{CH}_3\text{CN}:\text{H}_2\text{O}$  (3:1 v/v, 12.0 mL). The cell was equipped with a reticulated vitreous carbon (100 PPI) anode (0.8 cm x 0.8 cm x 1 cm). To the cathodic cell with a magnetic stir bar was added  $\text{LiClO}_4$  (127.2 mg, 0.1 M.) and  $\text{CH}_3\text{CN}:\text{H}_2\text{O}$  (3:1 v/v, 12.0 mL). The cell was equipped with a platinum plate (1 cm x 1cm) cathode. The membrane was used Aquivion membrane E98-05S. The electrolysis was carried out at rt using a constant current of 10 mA. The reaction mixture was stirred and electrolyzed for 1.08 h (2.0 F per mol of sulfonamide). When the reaction was finished, the reaction was quenched with saturated NaCl aqueous solution and extracted three times with ethyl acetate. The combined organic layers were dried over  $\text{Na}_2\text{SO}_4$  and concentrated in *vacuo*. The crude mixture was purified via silica gel column chromatography (25 % acetone/ petroleum ether) to afford product **1** (21 mg, 79%).

(e) On-off experiments

To the 10 mL three-necked round bottom flask with a magnetic stir bar was added the *N*-allylsulfonamide (0.2 mmol),  $\text{CF}_3\text{SO}_2\text{Na}$  (62.4 mg, 0.4 mmol, 2.0 equiv.),  $\text{LiClO}_4$  (63.6 mg, 0.1 M.) and  $\text{CH}_3\text{CN}:\text{H}_2\text{O}$  (3:1 v/v, 6.0 mL). The flask was equipped with a reticulated vitreous carbon (100

PPI) anode (0.8 cm x 0.8 cm x 1 cm) and a platinum plate (1 cm x 1cm) cathode. The electrolysis was carried out at rt using a constant current of 10 mA. The reaction mixture was stirred and electrolyzed for 0, 10, 20, 30, 40, 50, 60, 70, 80 min respectively. the reaction was quenched with saturated NaCl aqueous solution and extracted three times with ethyl acetate. The combined organic layers were dried over Na<sub>2</sub>SO<sub>4</sub> and concentrated in *vacuo*. The yield of product was determined by <sup>19</sup>F NMR using Trifluoromethoxybenzene as an internal standard.

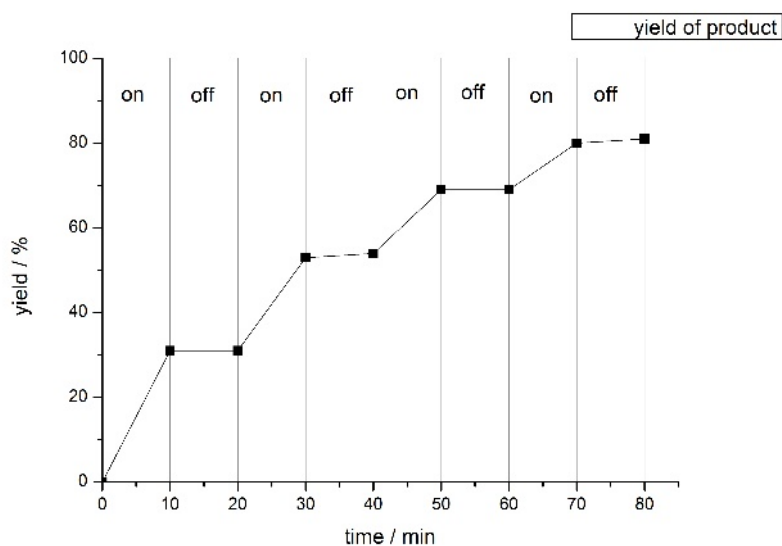

**Figure S21.** Electro on-off experiments

#### Cyclic Voltammetry Studies

The cyclic voltammograms were recorded on a Metrohm Autolab M204 workstation using Pt wire as working electrode and counter electrode, Ag/AgCl (saturated aq. KCl) as reference electrode and a scan rate of 100 mV/s. Cyclic voltammograms of 0.1 M LiClO<sub>4</sub> solution in CH<sub>3</sub>CN at room temperature.

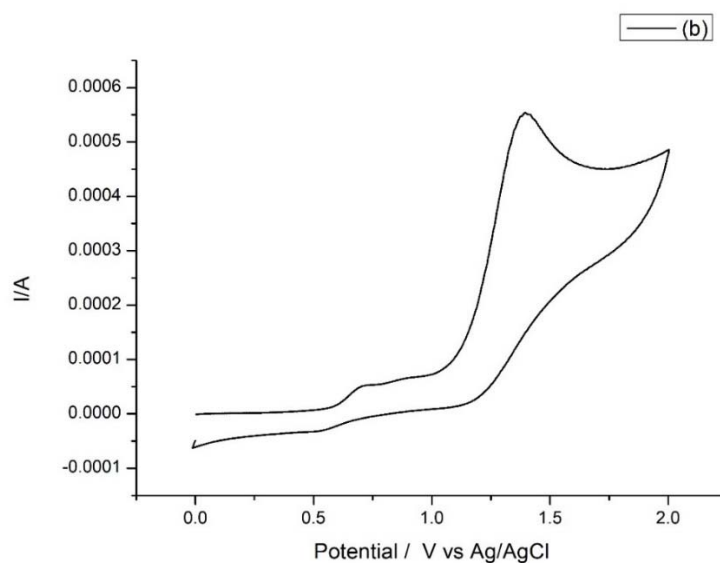

**Figure S22.** Cyclic voltammogram of CF<sub>3</sub>SO<sub>2</sub>Na (0.02 M), E<sub>p</sub> = 1.37 V.

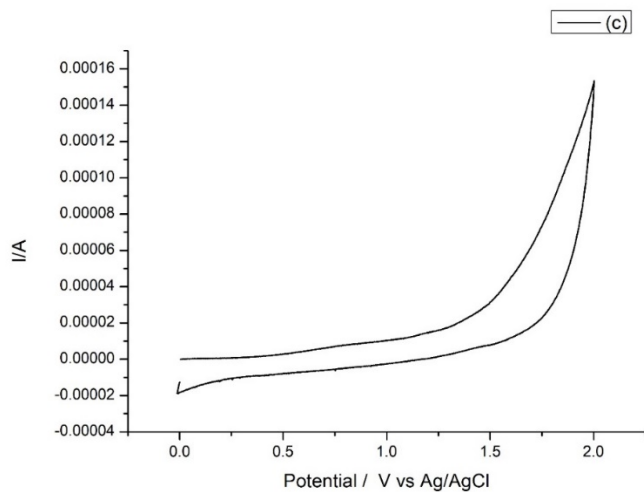

**Figure S23.** Cyclic voltammogram of **1a** (0.02 M), no oxidant peak in 0 - 2V.

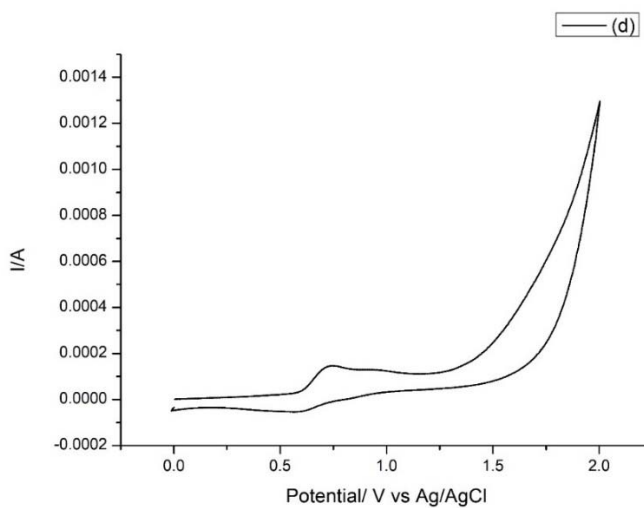

**Figure S24.** Cyclic voltammogram of **3a** in the presence of  $t\text{Bu}_4\text{NOH}$  (0.02 M),  $E_p = 0.70$  V

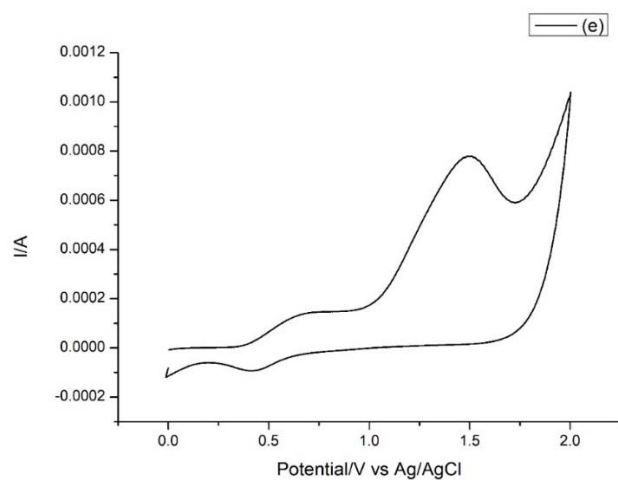

**Figure S25.** Cyclic voltammogram of  $\text{H}_2\text{SO}_3$  (0.04 M),  $E_p = 0.60$  V, 1.41 V.

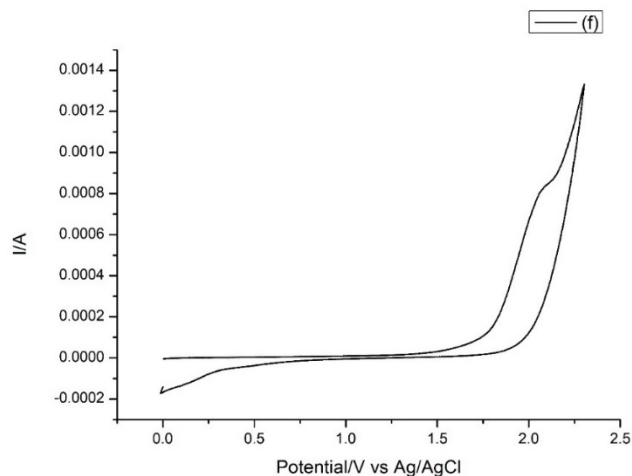

**Figure S26.** Cyclic voltammogram of **3a**,  $E_p = 2.0$  V.

g)  $\text{H}_2\text{SO}_3$  effect in migration/cyclization chemoselectivity

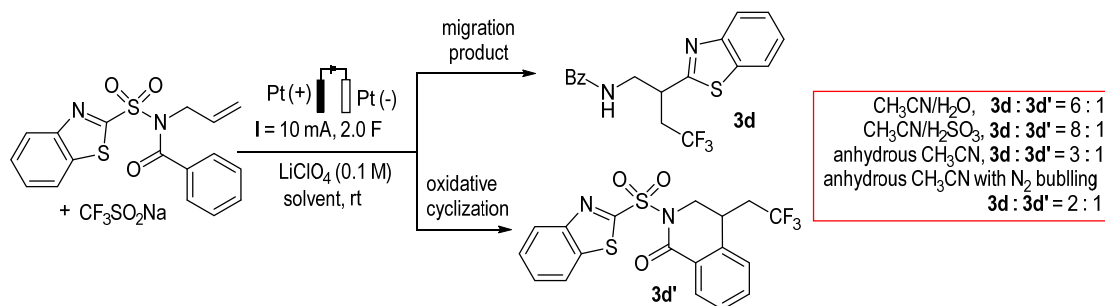

The electrolysis was carried out in the electrolysis cell of IKA® ElectraSyn 2.0. To the 10 mL vial with a magnetic stir bar was added the substituted *N*-allyl-*N*-(benzo[*d*]thiazol-2-ylsulfonyl)benzamide (35.8 mg, 0.1 mmol),  $\text{CF}_3\text{SO}_2\text{Na}$  (31.2 mg, 0.2 mmol, 2.0 equiv.),  $\text{LiClO}_4$  (63.6 mg, 0.6 mmol), solvent (6 mL). The vial was attached to the vial cap equipped with Pt anode and Pt cathode. The electrolysis was carried out at rt using a constant current of 10 mA. The reaction mixture was stirred and electrolyzed for 0.54 h (2.0 F per mol of amide). When the reaction was finished, the reaction was quenched with saturated NaCl aqueous solution and extracted three times with ethyl acetate. The combined organic layers were dried over  $\text{Na}_2\text{SO}_4$  and concentrated in *vacuo*. The ratio of **3d** to **3d'** was determined by  $^{19}\text{F}$  NMR spectroscopy.

## 9. X-Ray Crystallographic Data

Absolute configurations of products 3 were assigned based on the crystal X-ray structures of **3x**.

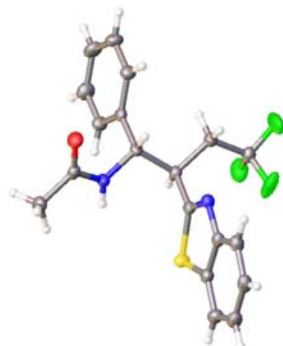

**Figure S27.** The crystal structure of **3x**

**Table S3** Crystal data and structure refinement

|                                        |                                                                  |
|----------------------------------------|------------------------------------------------------------------|
| Empirical formula                      | C <sub>19</sub> H <sub>17</sub> F <sub>3</sub> N <sub>2</sub> OS |
| Formula weight                         | 378.40                                                           |
| Space group                            | P 1 21/n 1                                                       |
| a (Å)                                  | 8.79170(18)                                                      |
| b (Å)                                  | 10.2470(2)                                                       |
| c (Å)                                  | 19.1126(4)                                                       |
| $\alpha$ (deg)                         | 90                                                               |
| $\beta$ (deg)                          | 98.050(2)                                                        |
| $\gamma$ (deg)                         | 90                                                               |
| V (Å <sup>3</sup> )                    | 1704.86(6)                                                       |
| Z                                      | 4                                                                |
| T (K)                                  | 150K                                                             |
| $\rho$ calculated (g/cm <sup>3</sup> ) | 1.474                                                            |
| $\mu$ (mm <sup>-1</sup> )              | 2.072                                                            |
| F(000)                                 | 784.0                                                            |
| Nref                                   | 3320                                                             |
| Theta (max)                            | 72.942                                                           |
| wR2 (reflections)                      | 0.1072 (3320)                                                    |

## 10. NMR Spectra for new compounds

### *N*-allyl-*N*-(benzo[d]thiazol-2-ylsulfonyl)acetamide (1a)

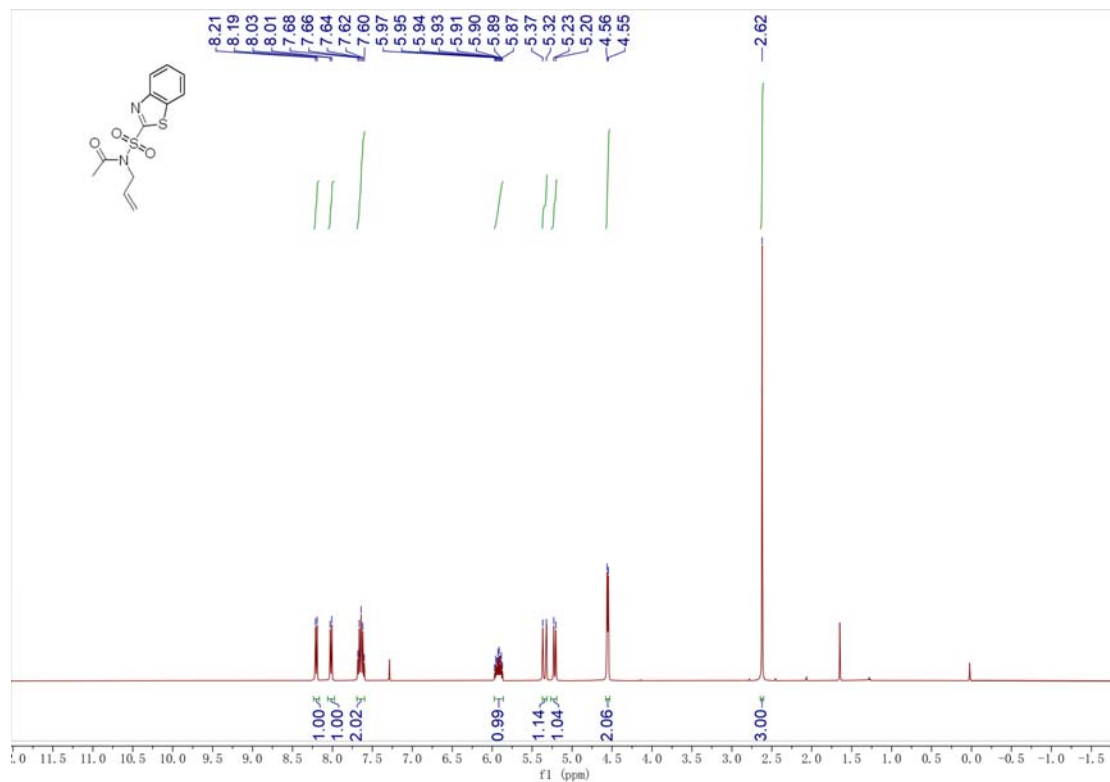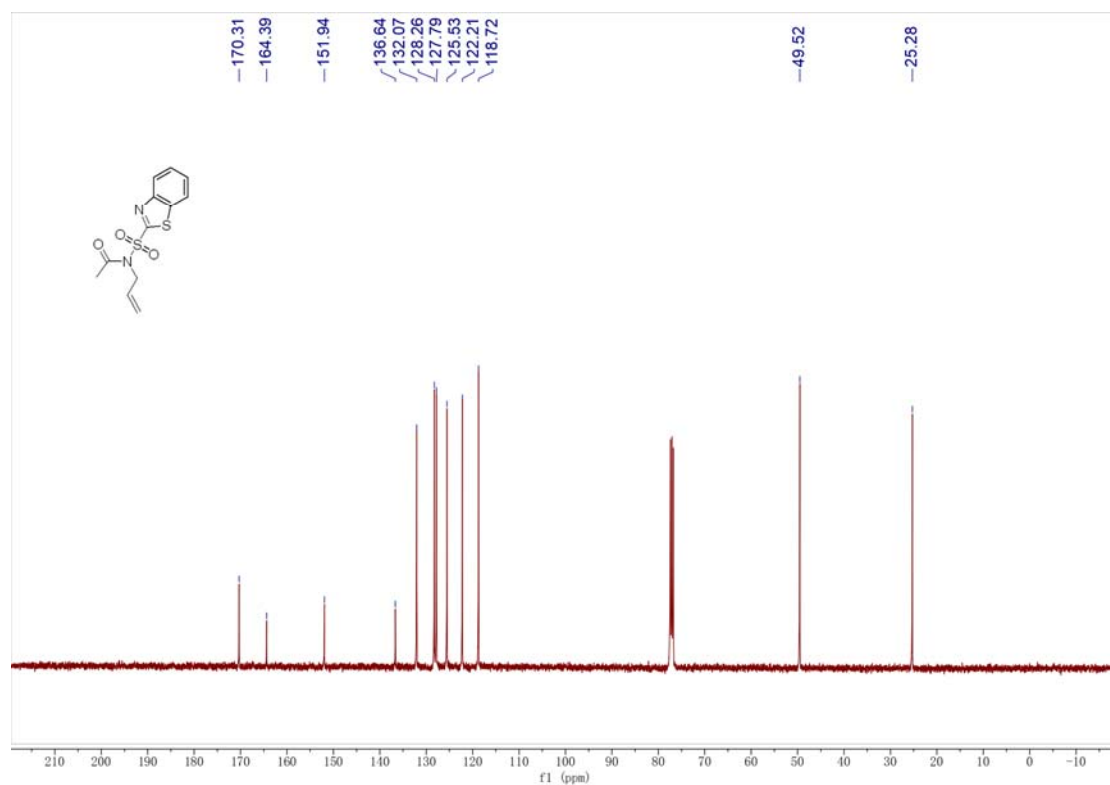

### tert-butyl allyl(benzo[d]thiazol-2-ylsulfonyl)carbamate (1b)



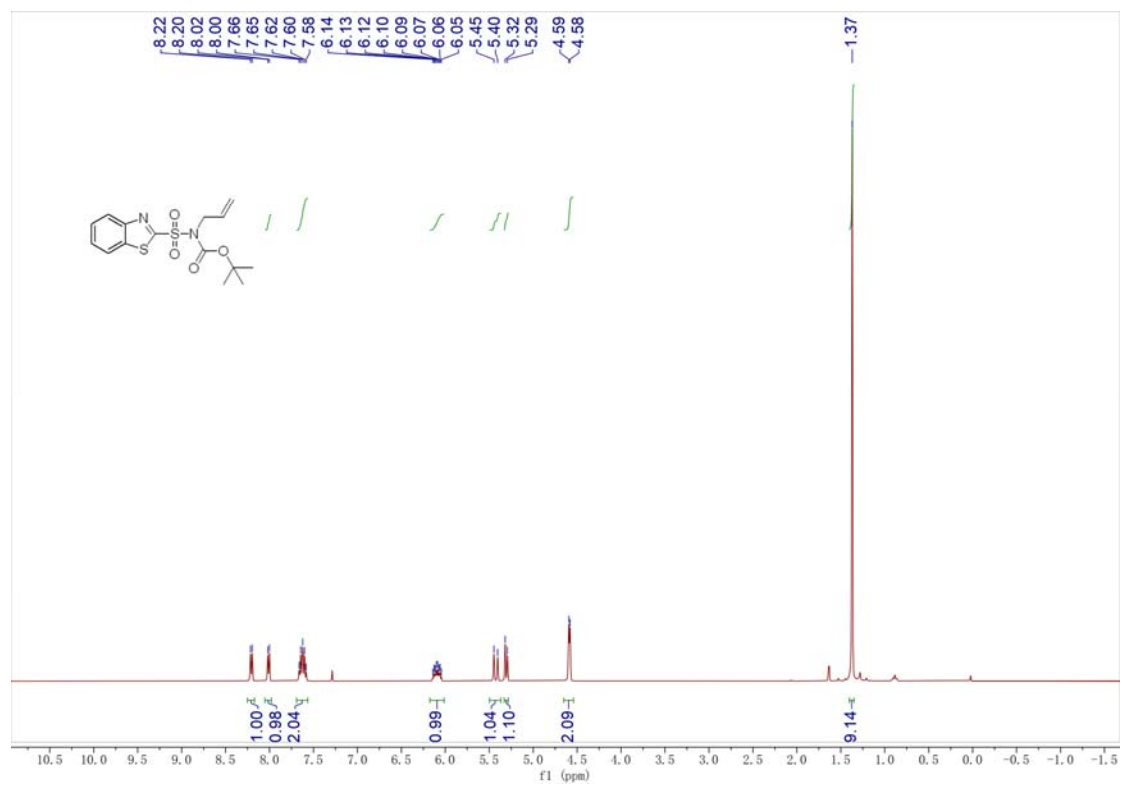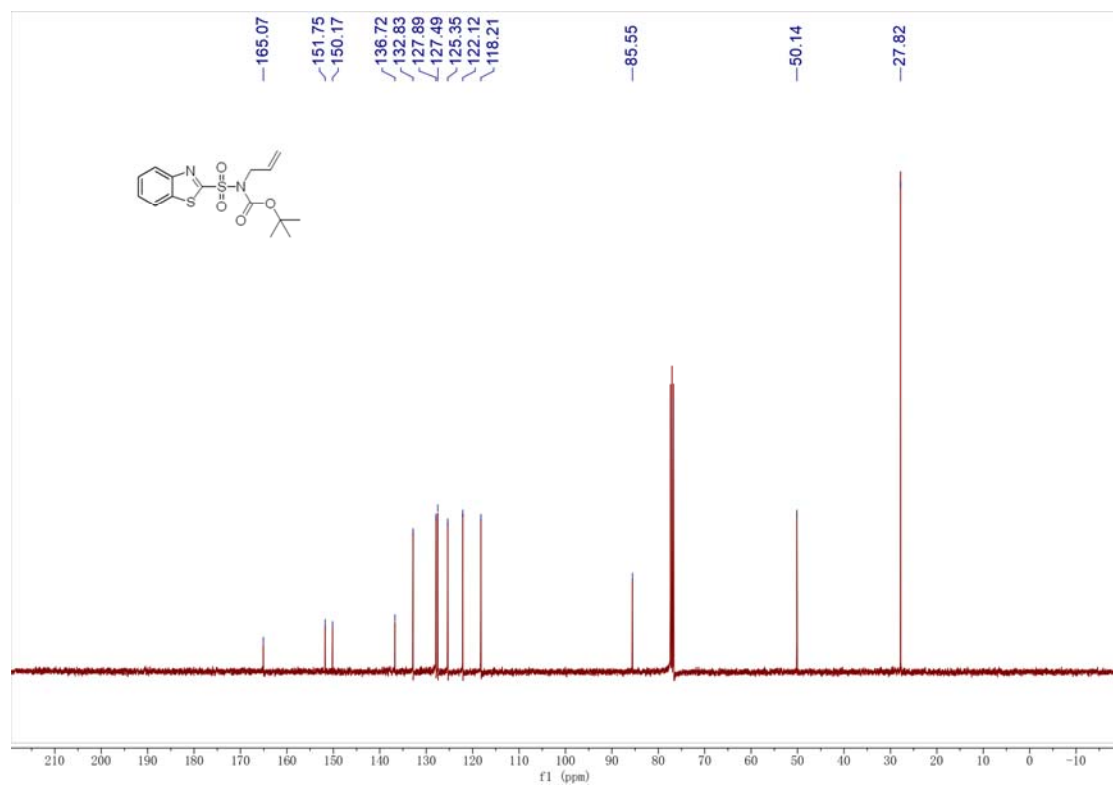

***N*-allyl-*N*-(benzo[d]thiazol-2-ylsulfonyl)pivalamide (1c)**

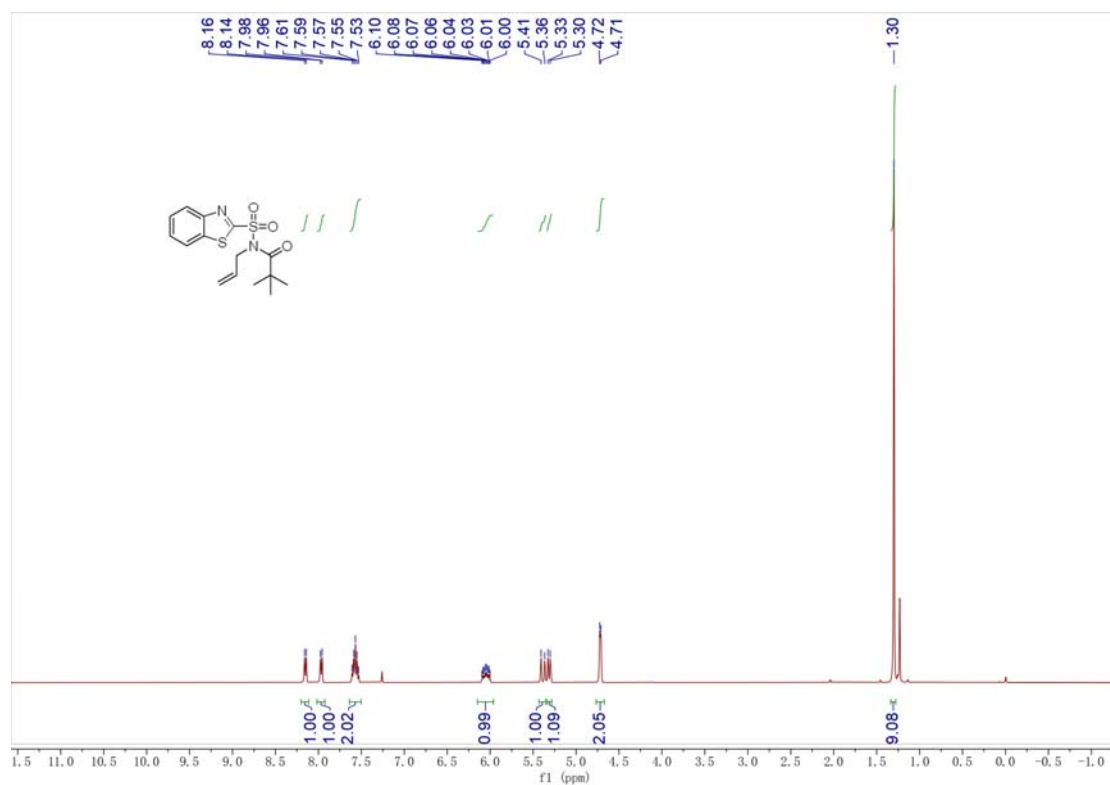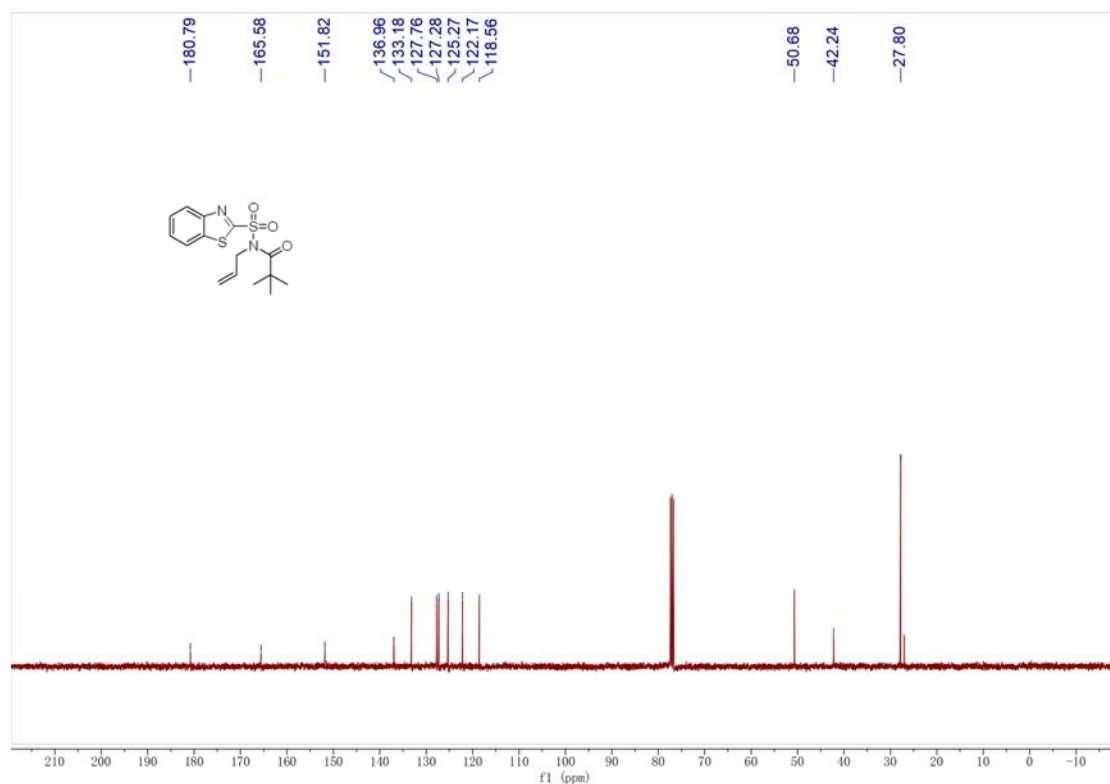

***N*-allyl-*N*-(benzo[d]thiazol-2-ylsulfonyl)benzamide (1d)**

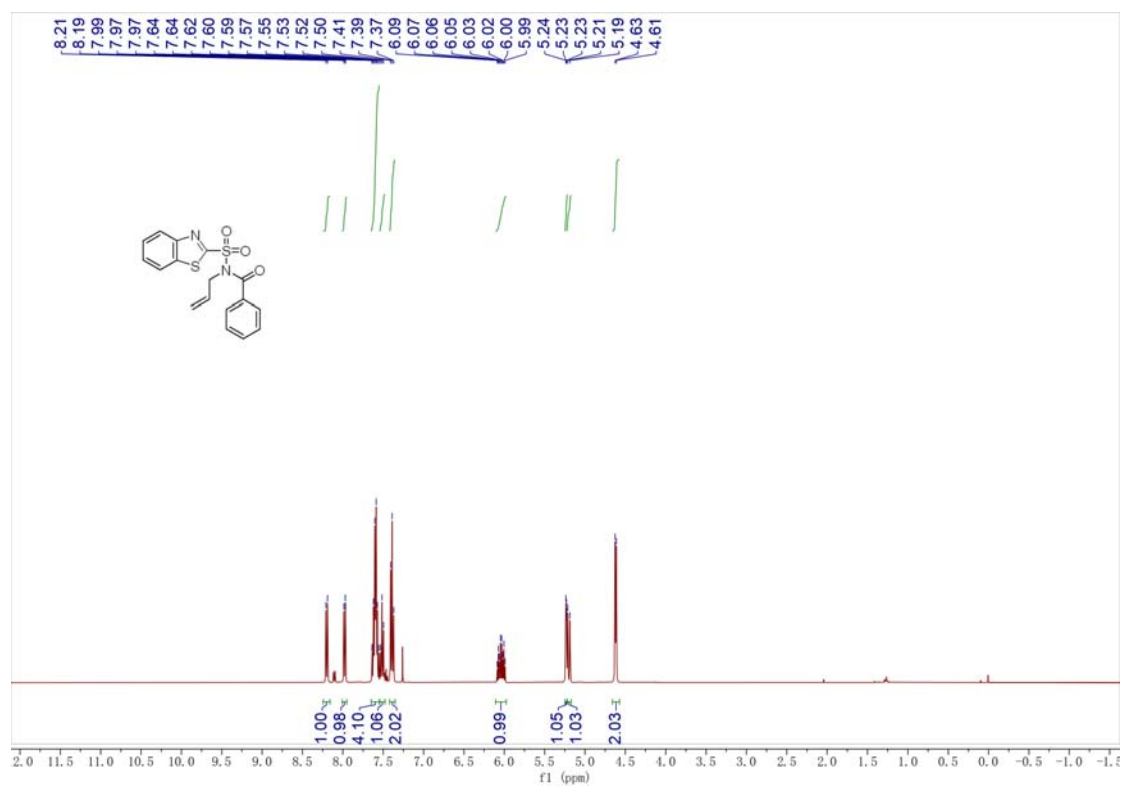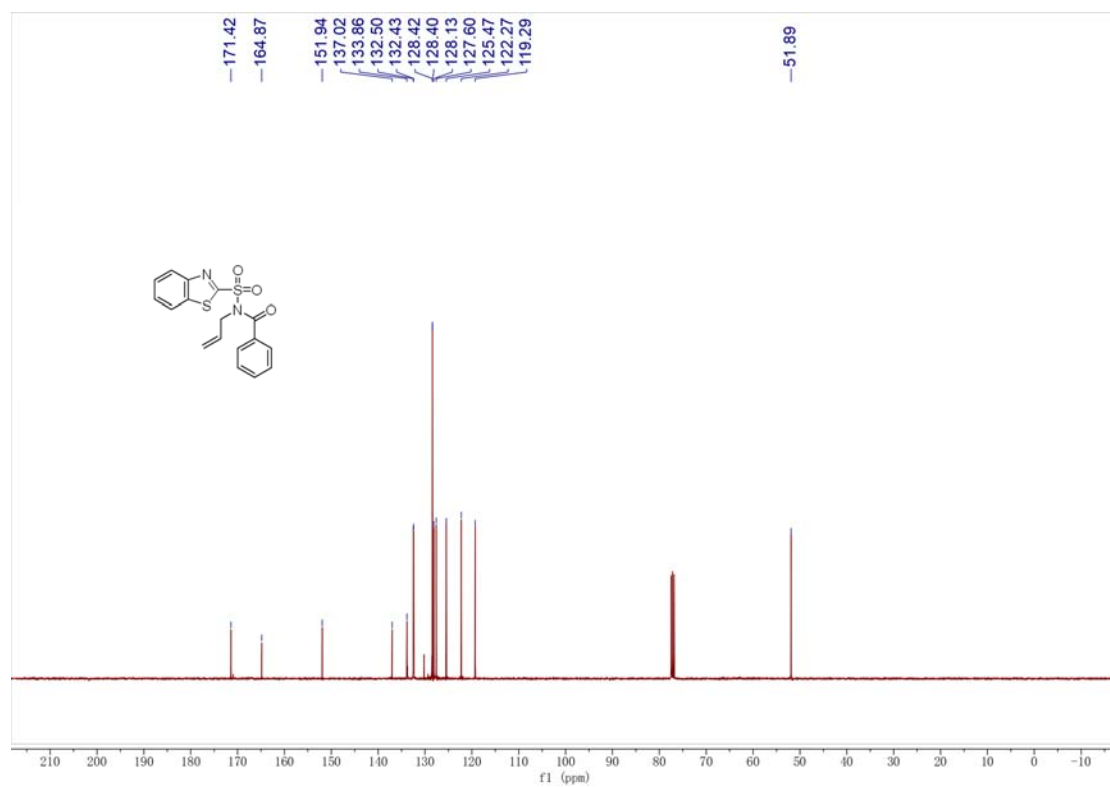

# N-allyl-N-phenylbenzo[d]thiazole-2-sulfonamide

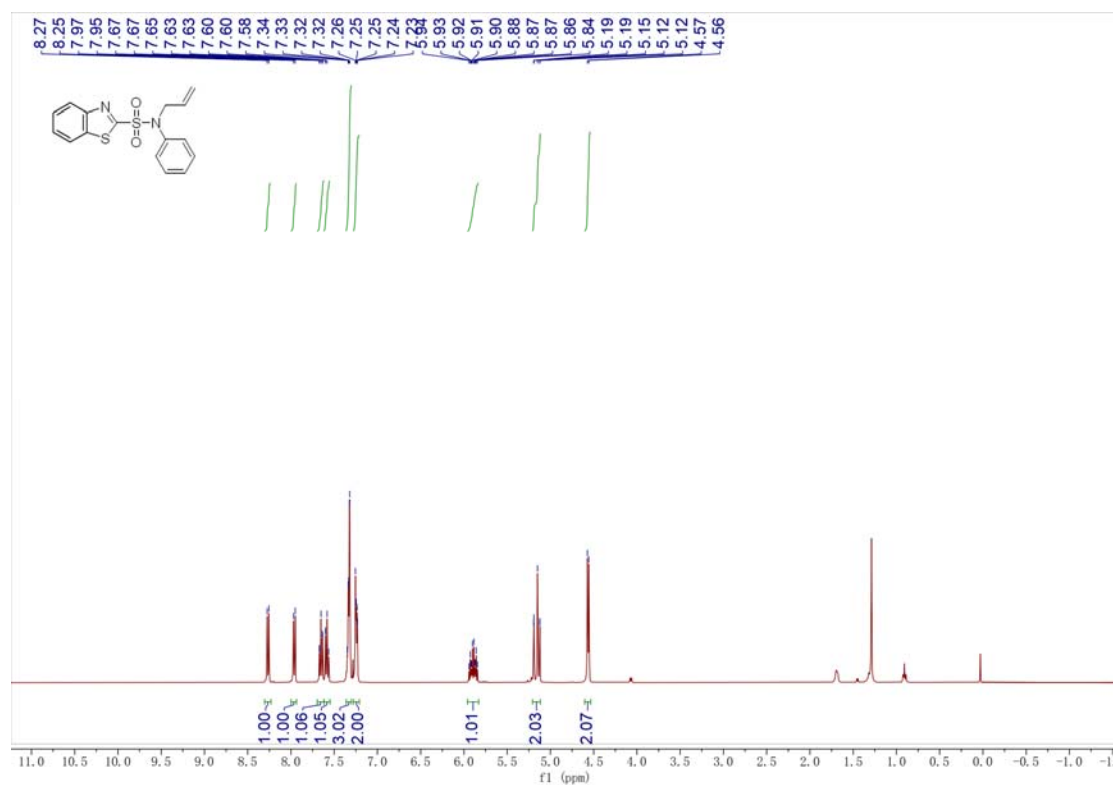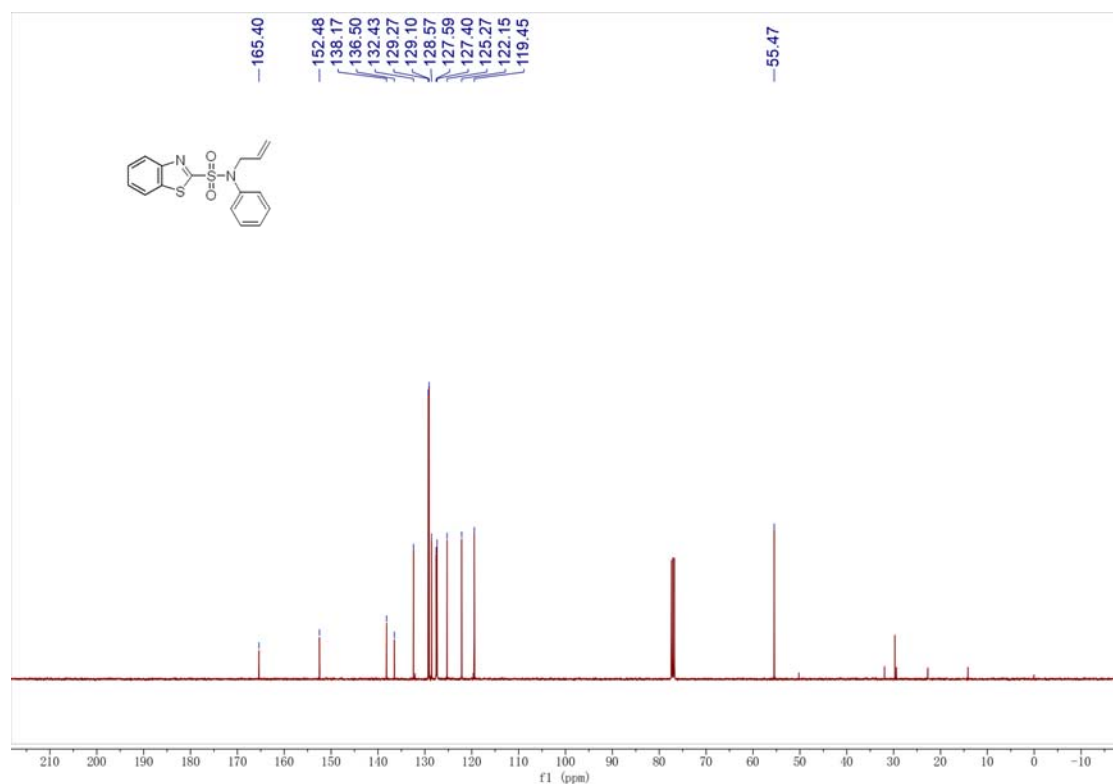

***N*-allyl-*N*-(pyrimidin-2-yl)benzo[d]thiazole-2-sulfonamide (1e)**

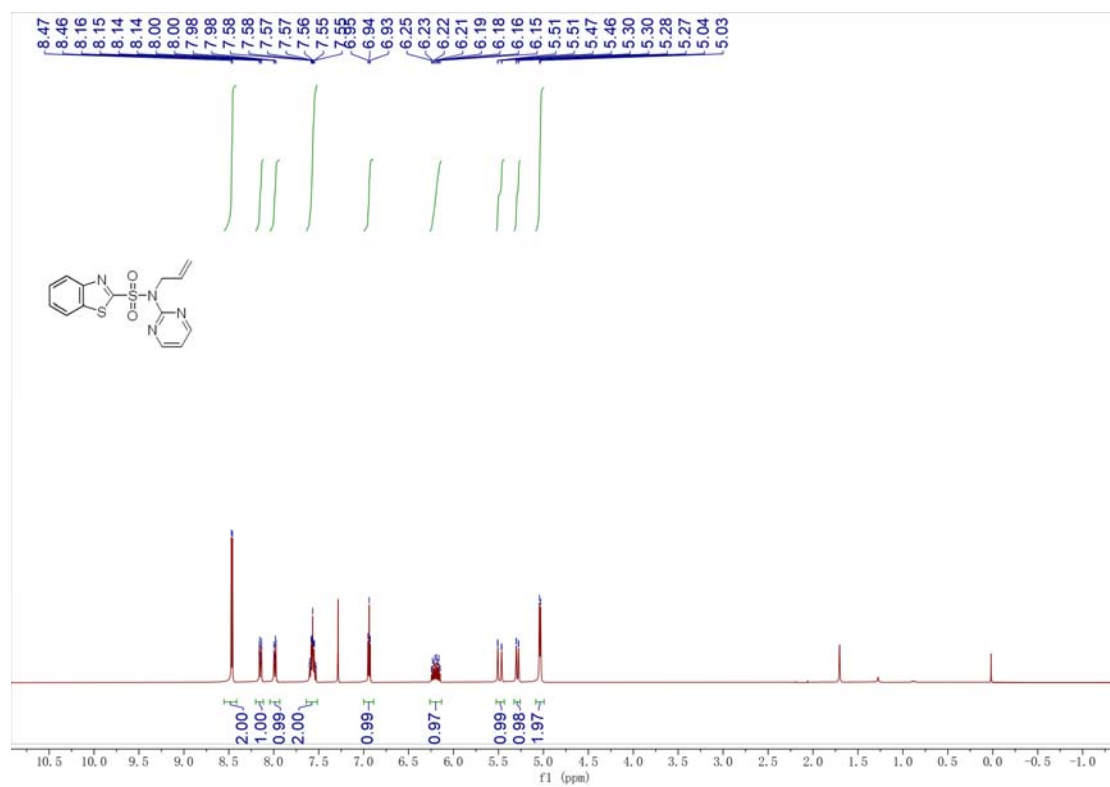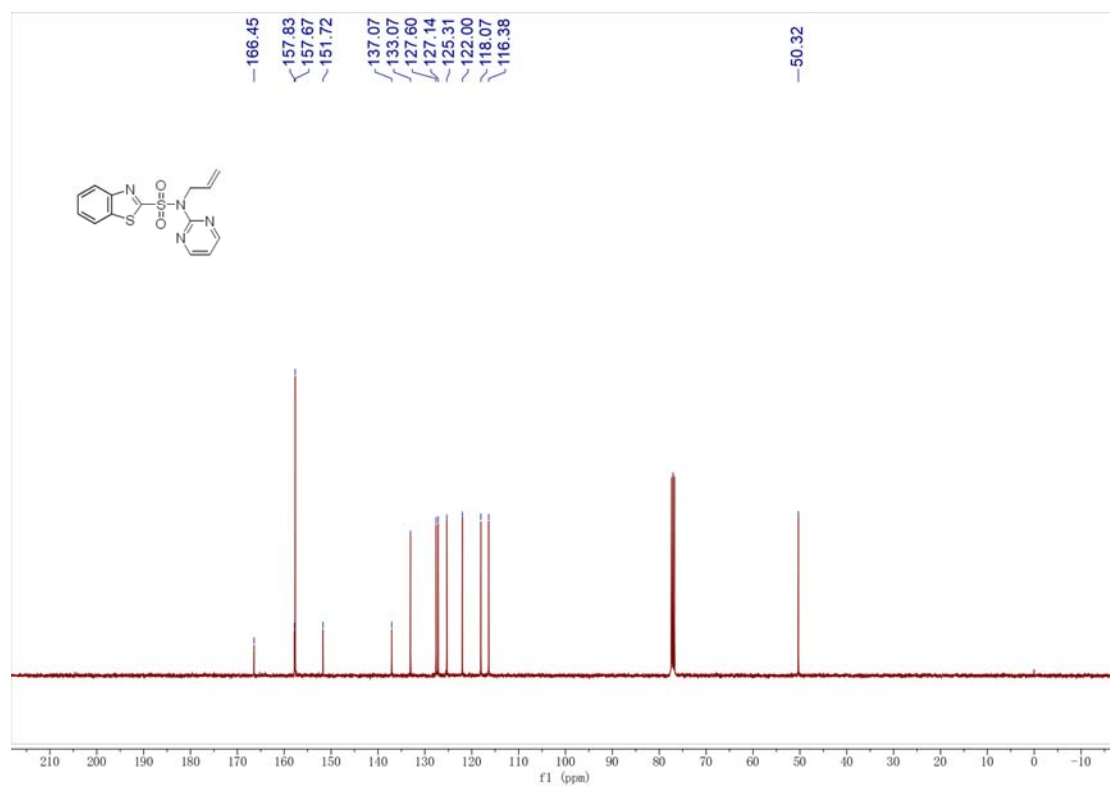

***N*-allyl-*N*-(thiazol-2-ylsulfonyl)acetamide (1f)**

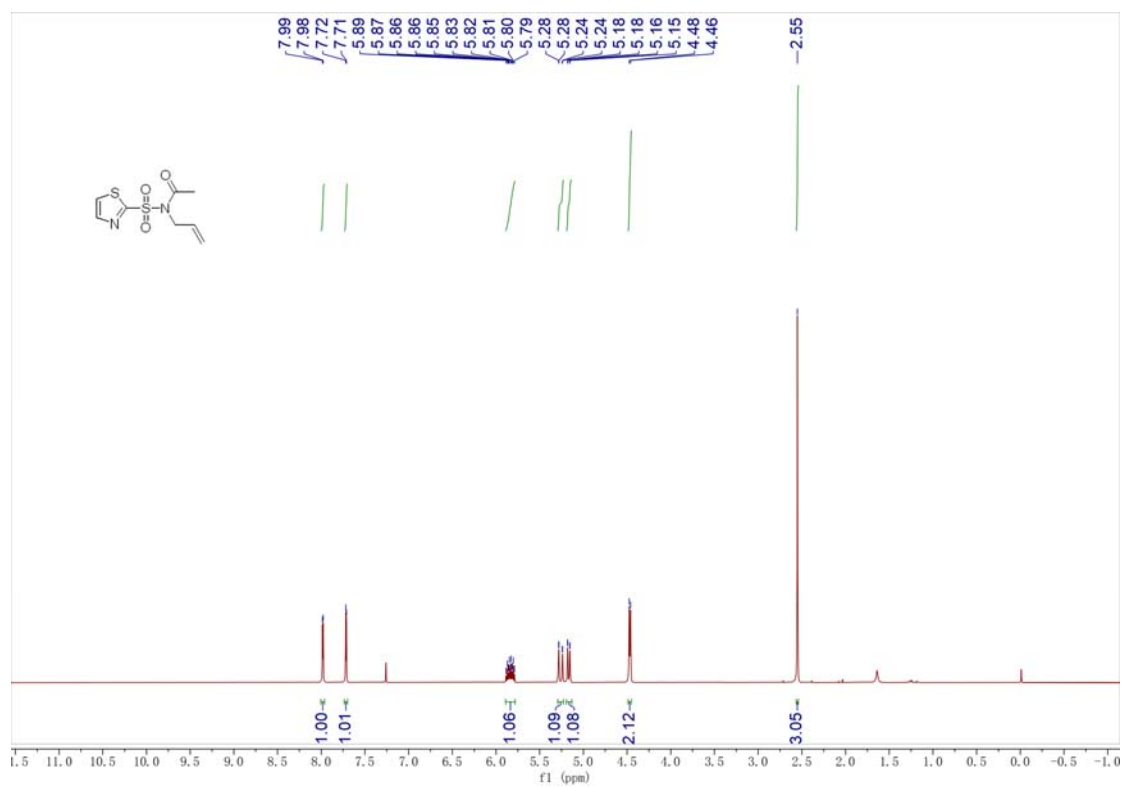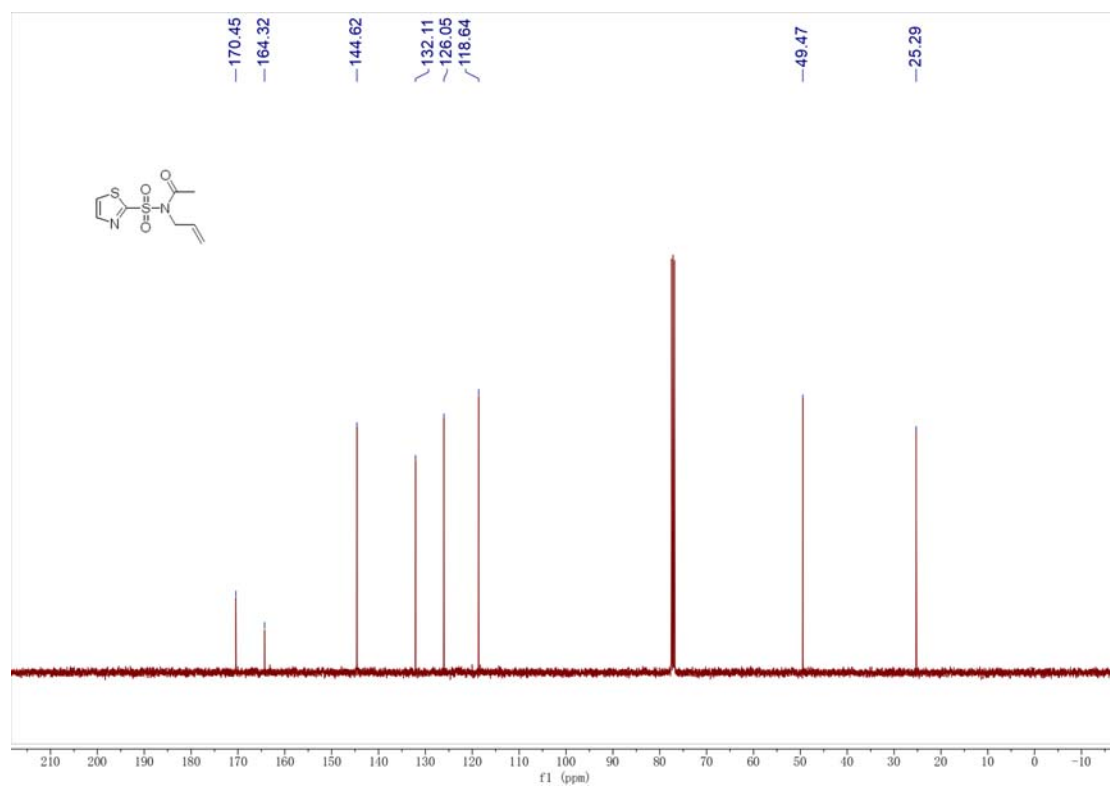

***N*-allyl-*N*-((5-chlorothiophen-2-yl)sulfonyl)acetamide (1g)**

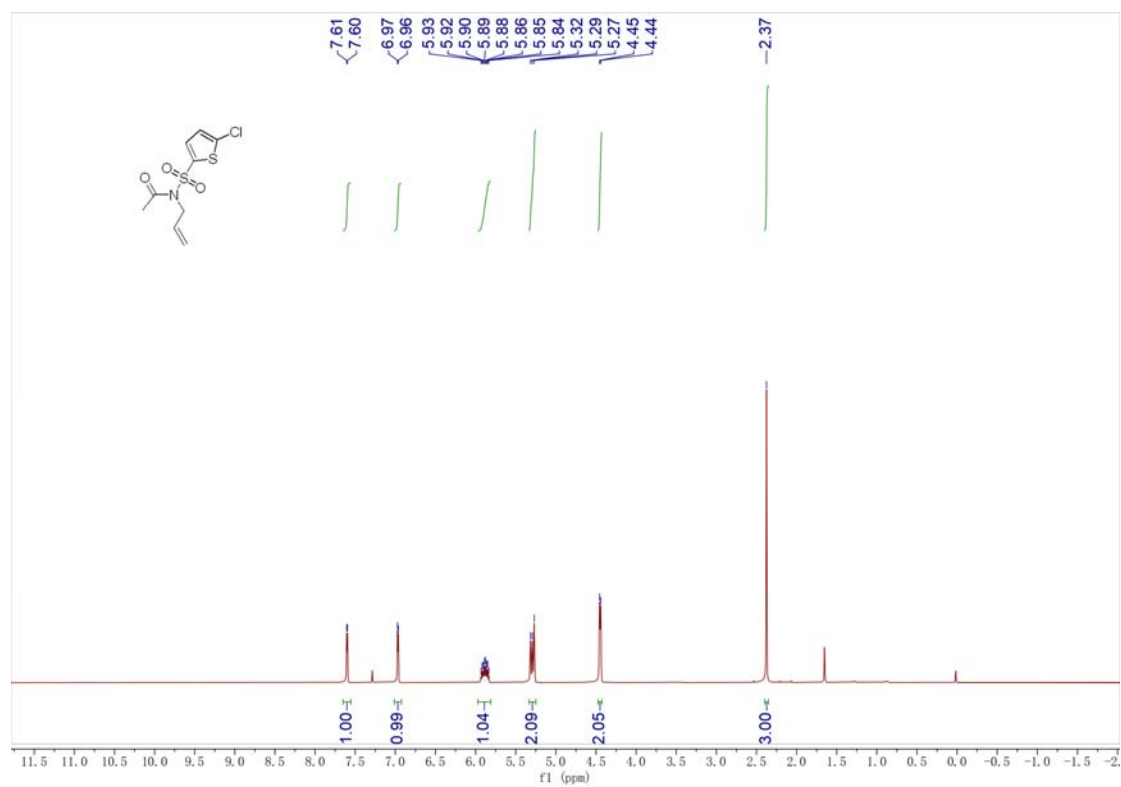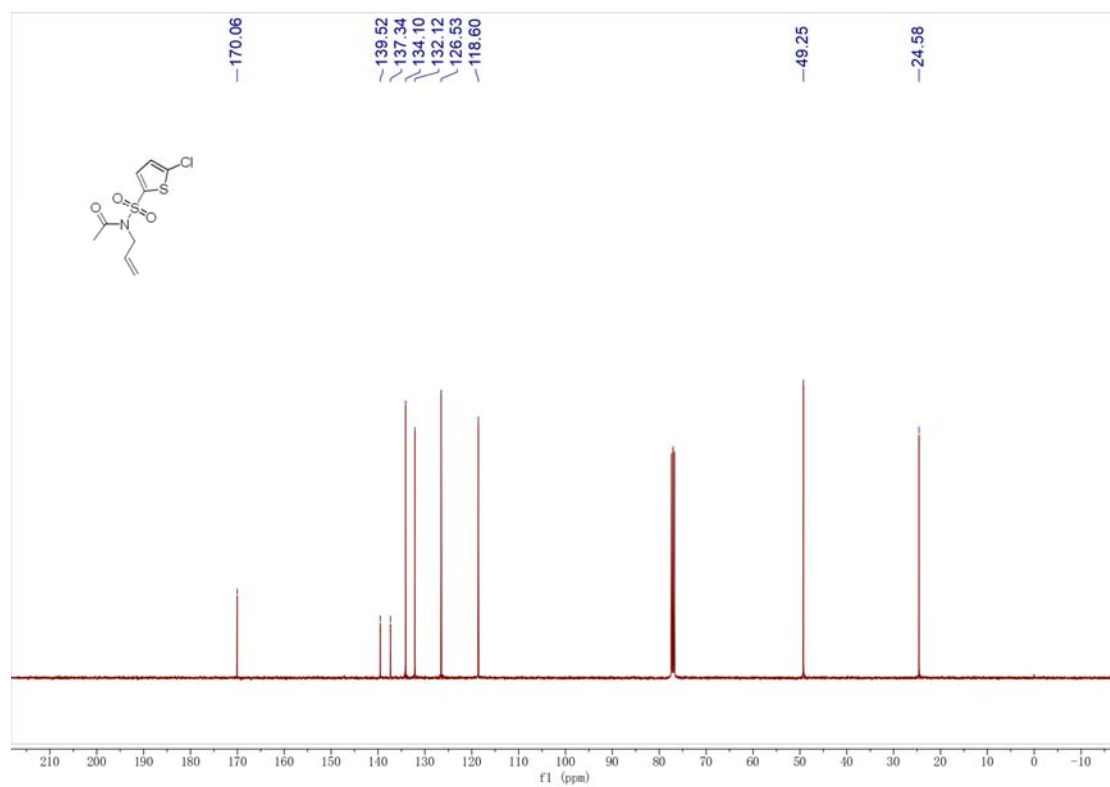

***N*-allyl-*N*-((5-bromothiophen-2-yl)sulfonyl)acetamide (1h)**

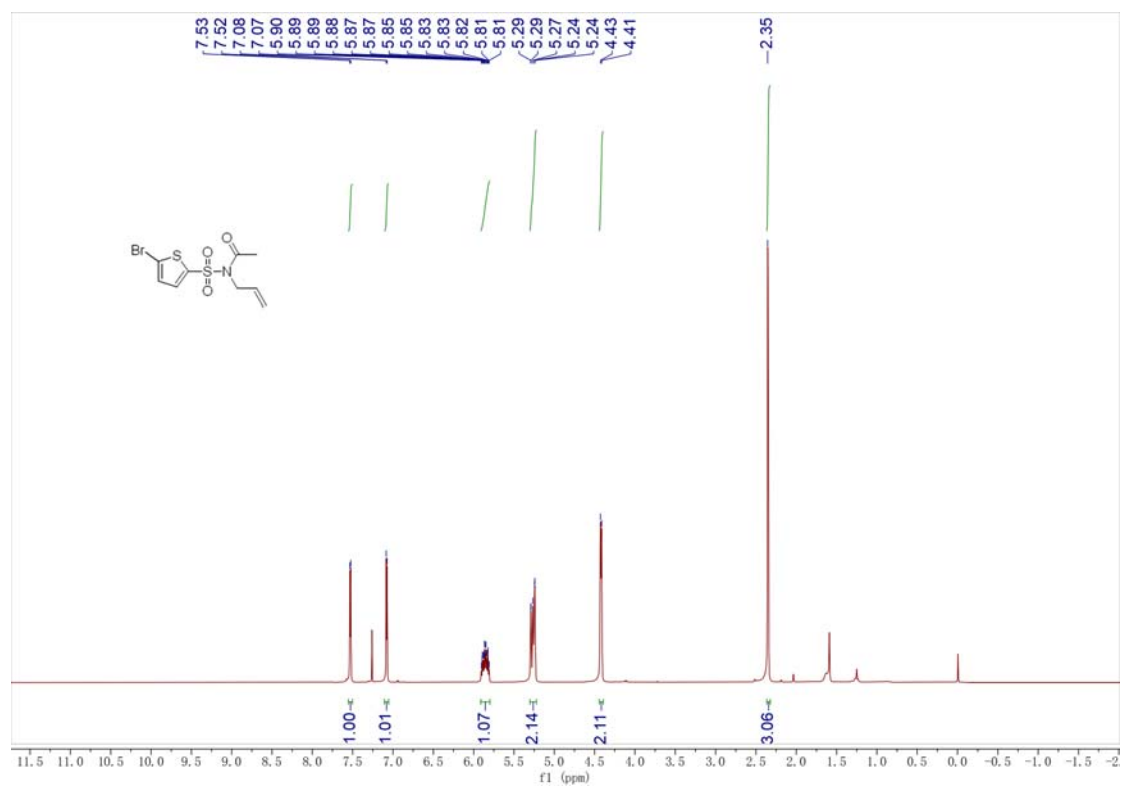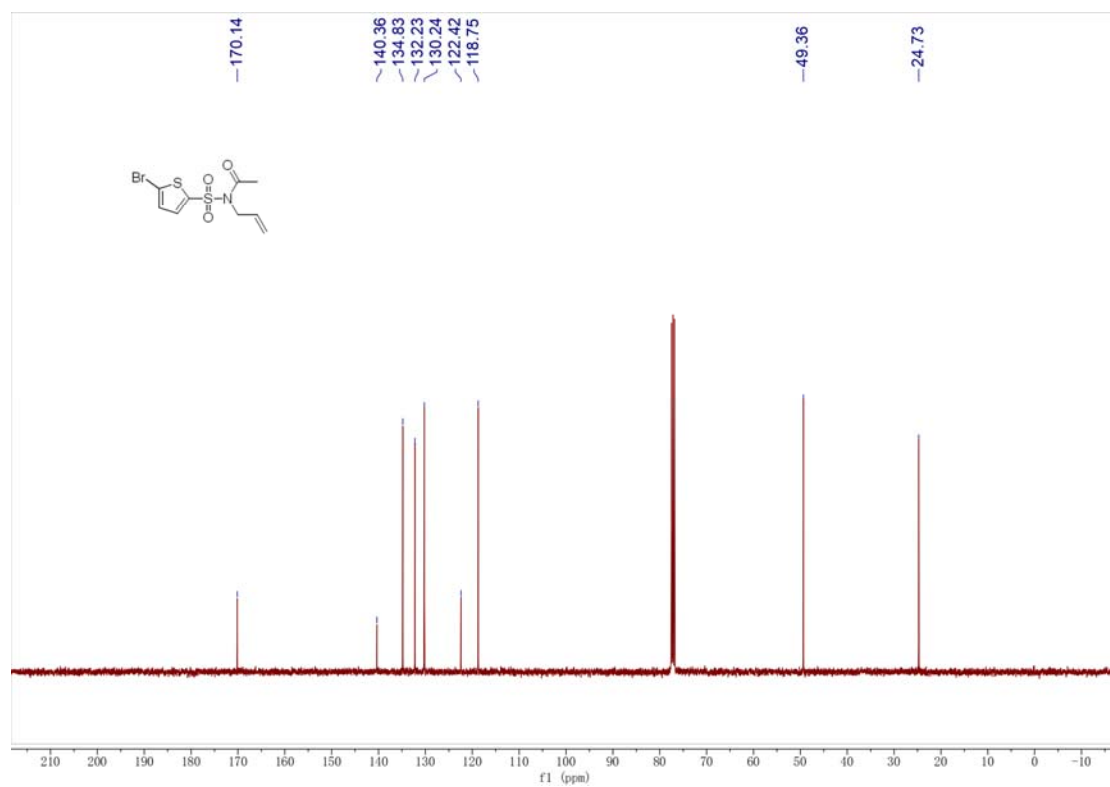



**methyl 5-(*N*-acetyl-*N*-allylsulfamoyl)thiophene-2-carboxylate (1i)**

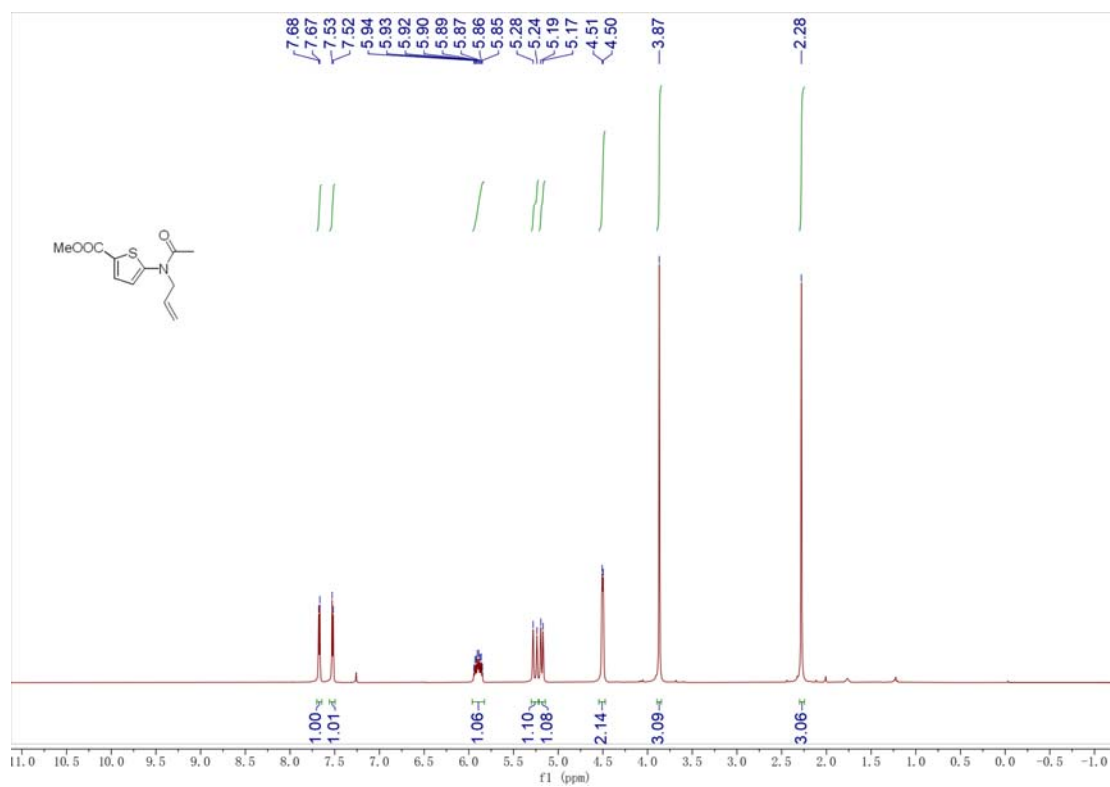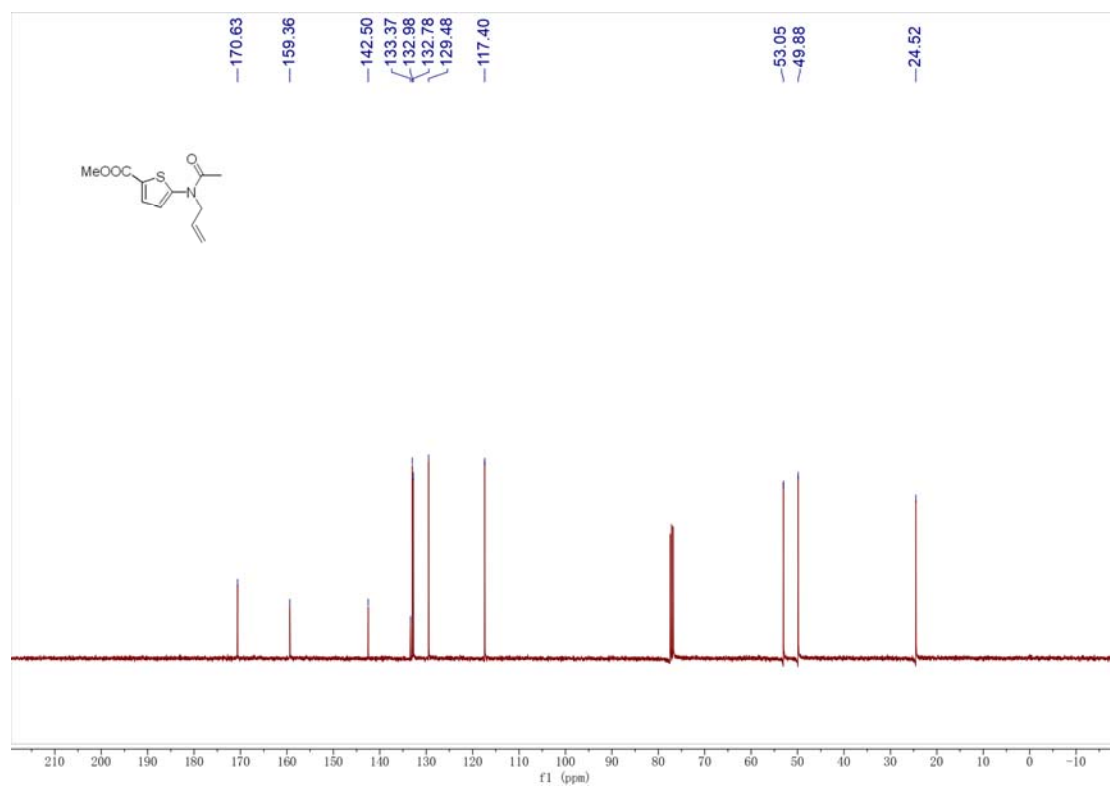

***N*-((3-acetyl-5-chlorothiophen-2-yl)sulfonyl)-*N*-allylacetamide (1j)**

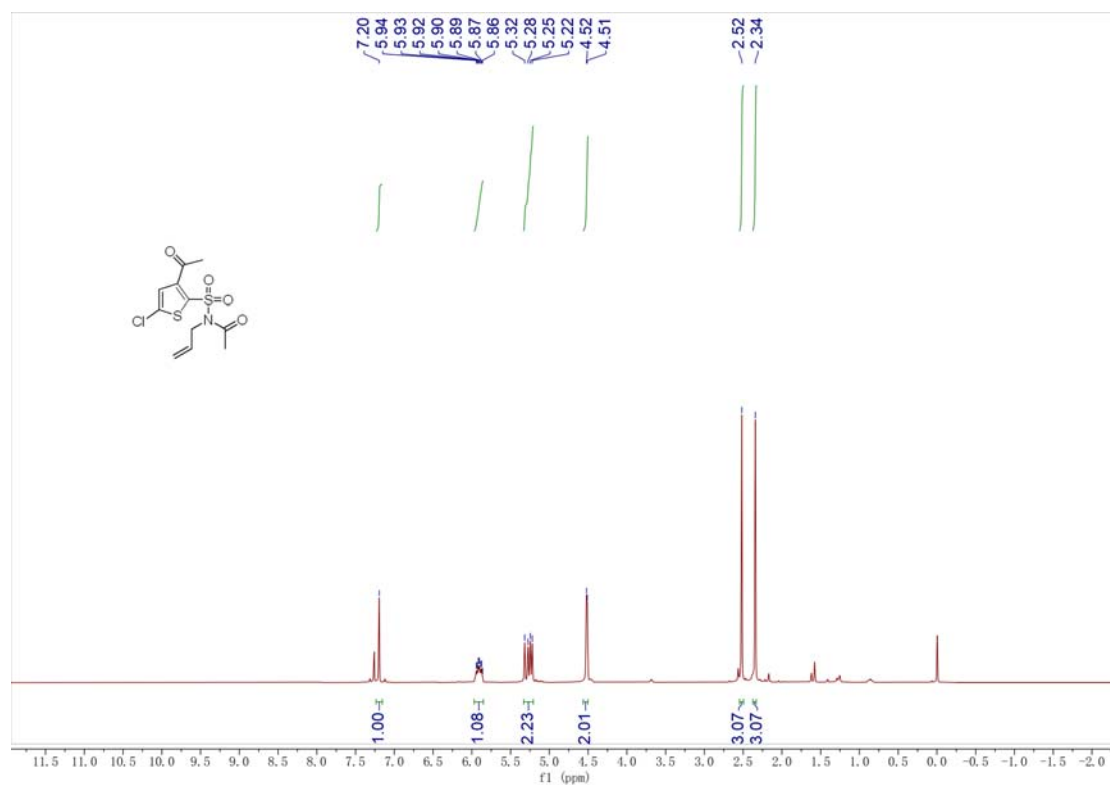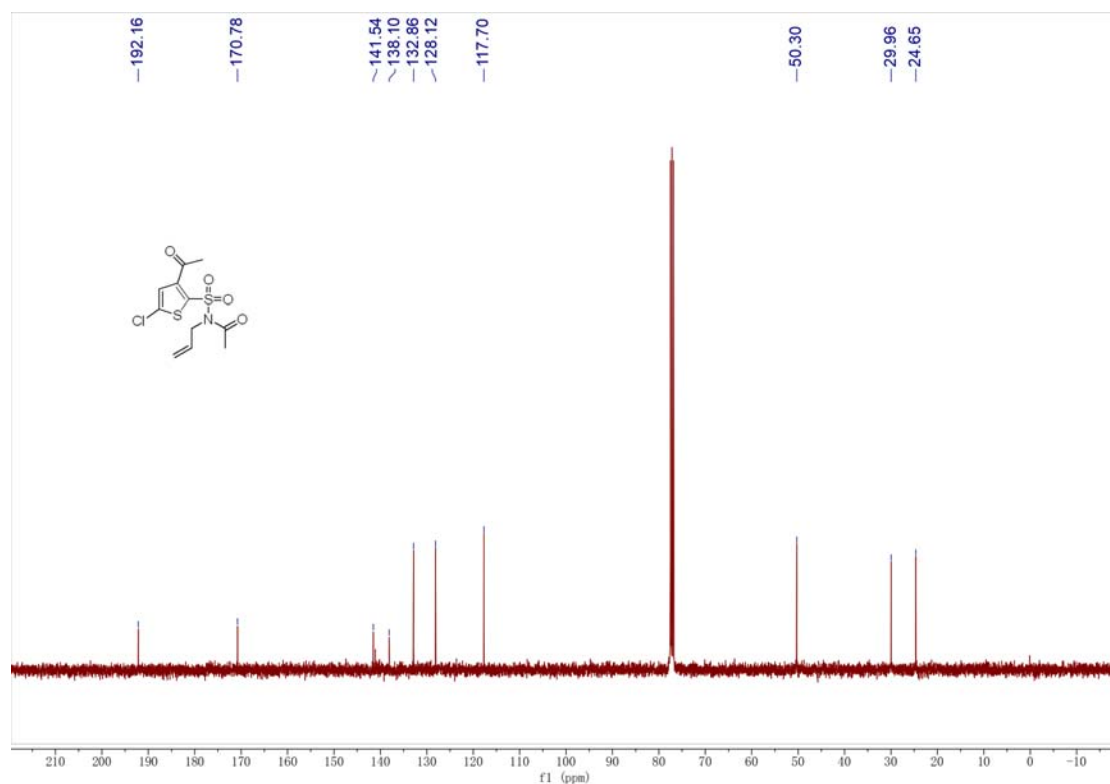

***N*-allyl-*N*-((5-methyl-1,3,4-thiadiazol-2-yl)sulfonyl)acetamide (1k)**

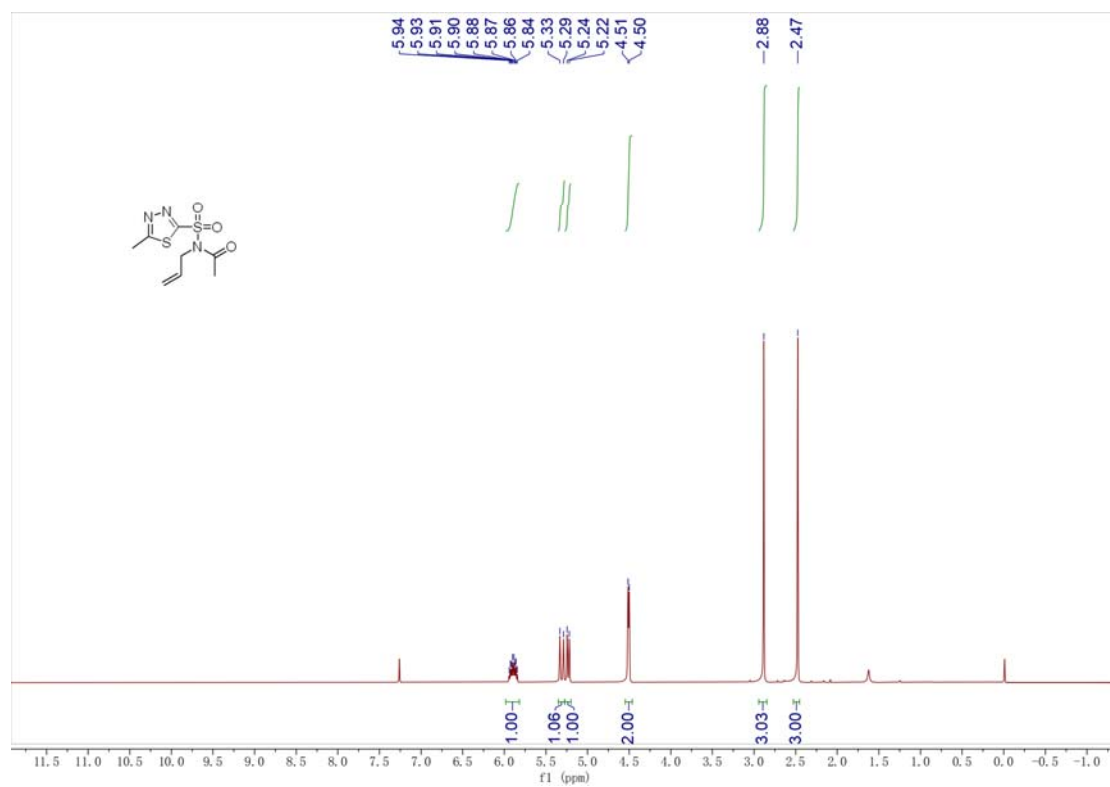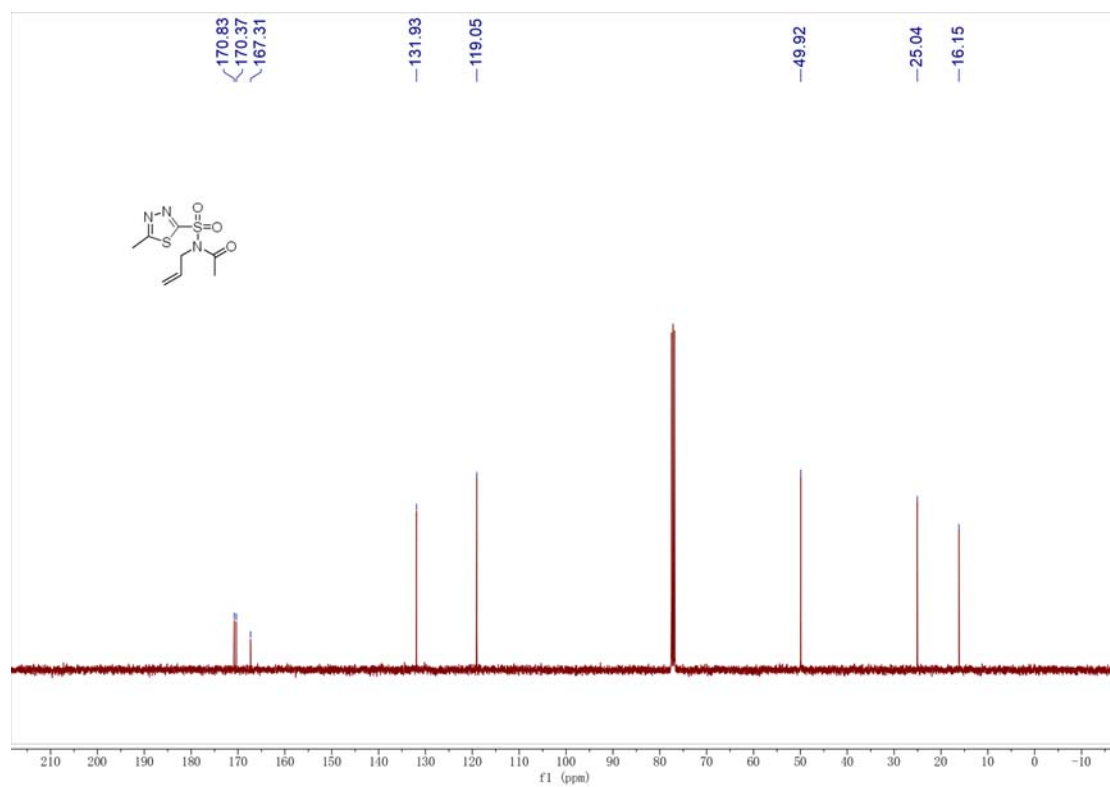

***N*-allyl-*N*-(pyrimidin-2-ylsulfonyl)acetamide (11)**

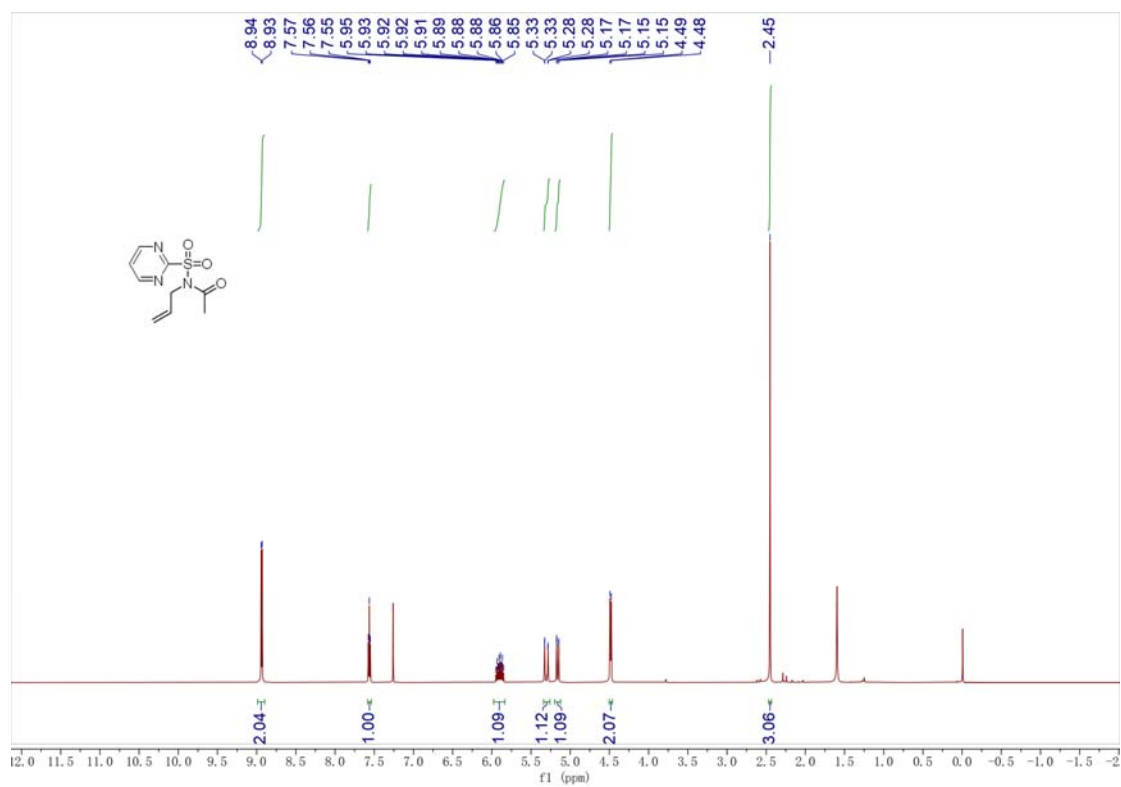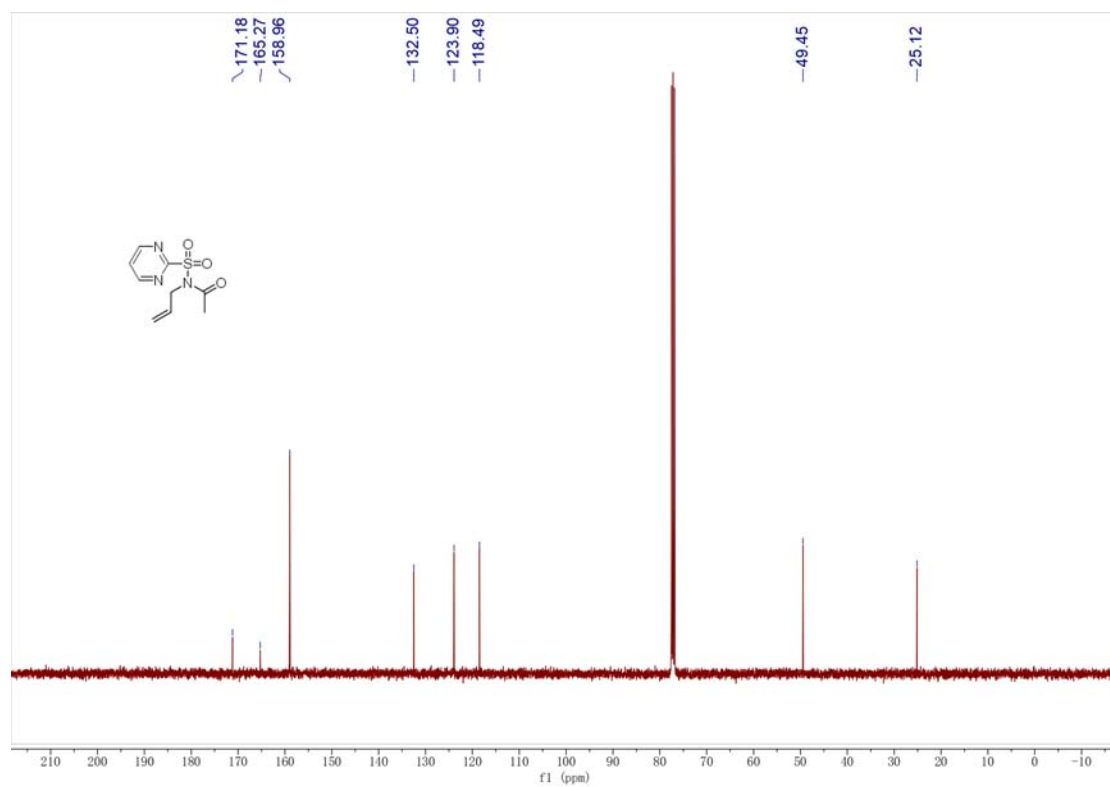

***N*-allyl-*N*-(pyridin-2-ylsulfonyl)acetamide (1m)**

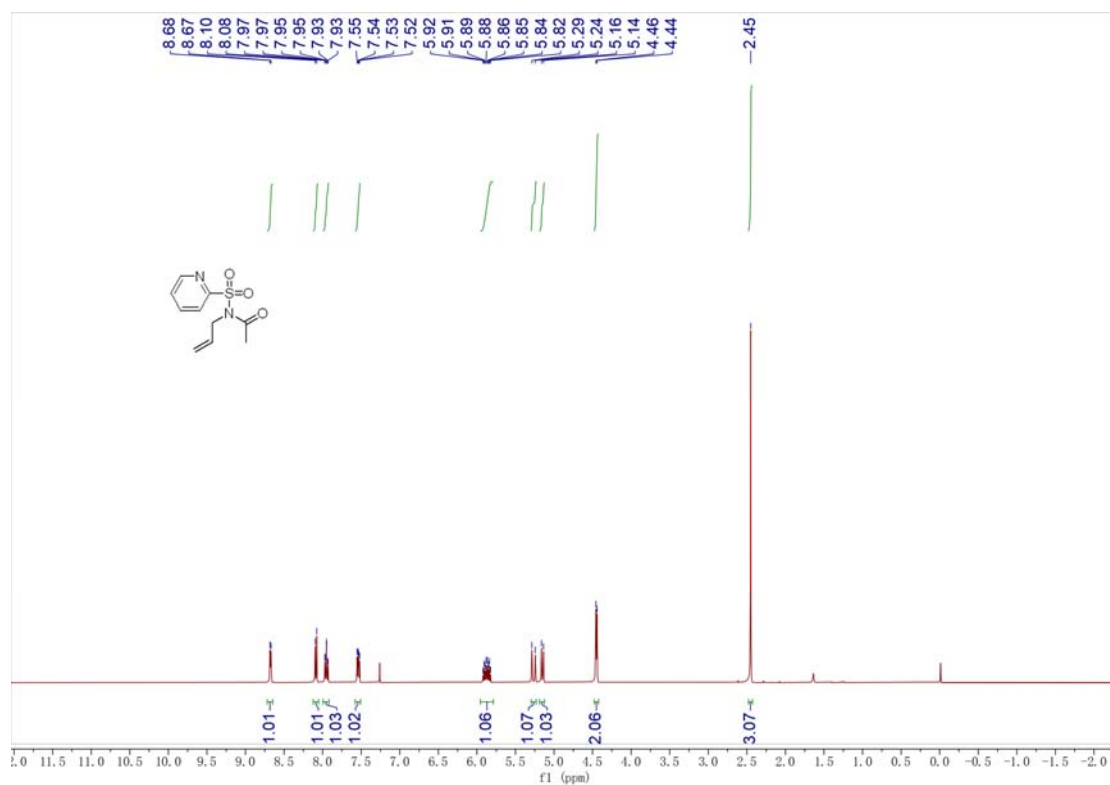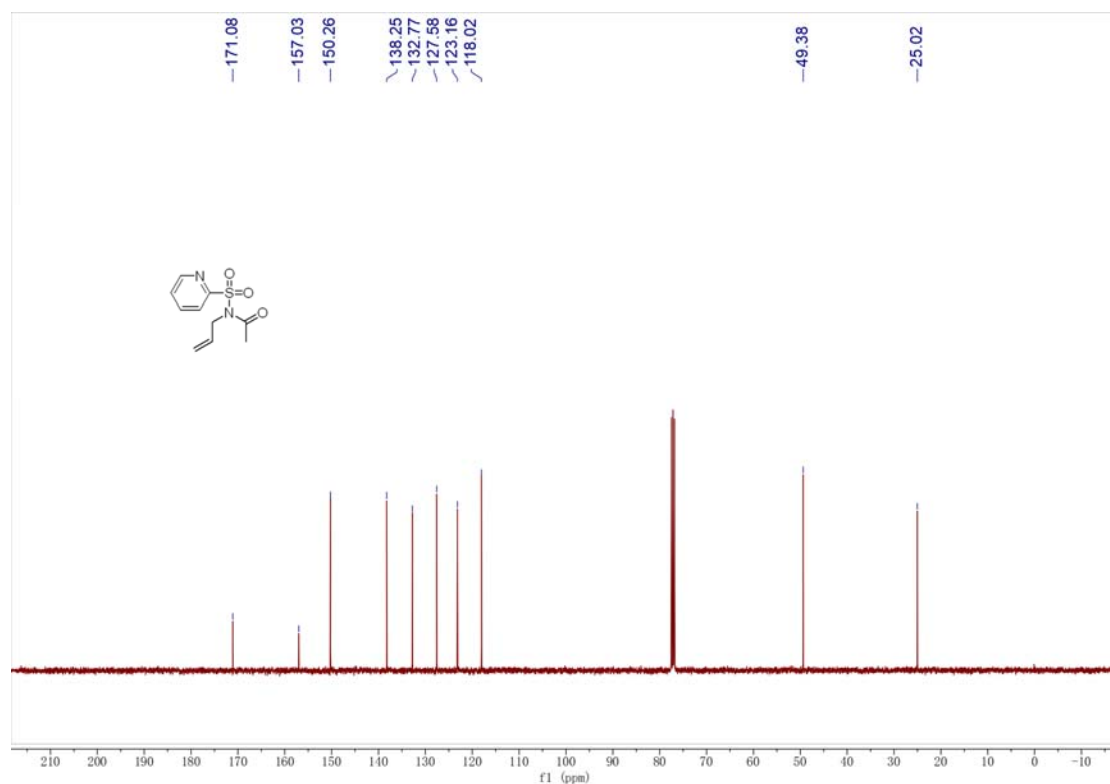

***N*-allyl-*N*-(quinolin-8-ylsulfonyl)acetamide (1n)**

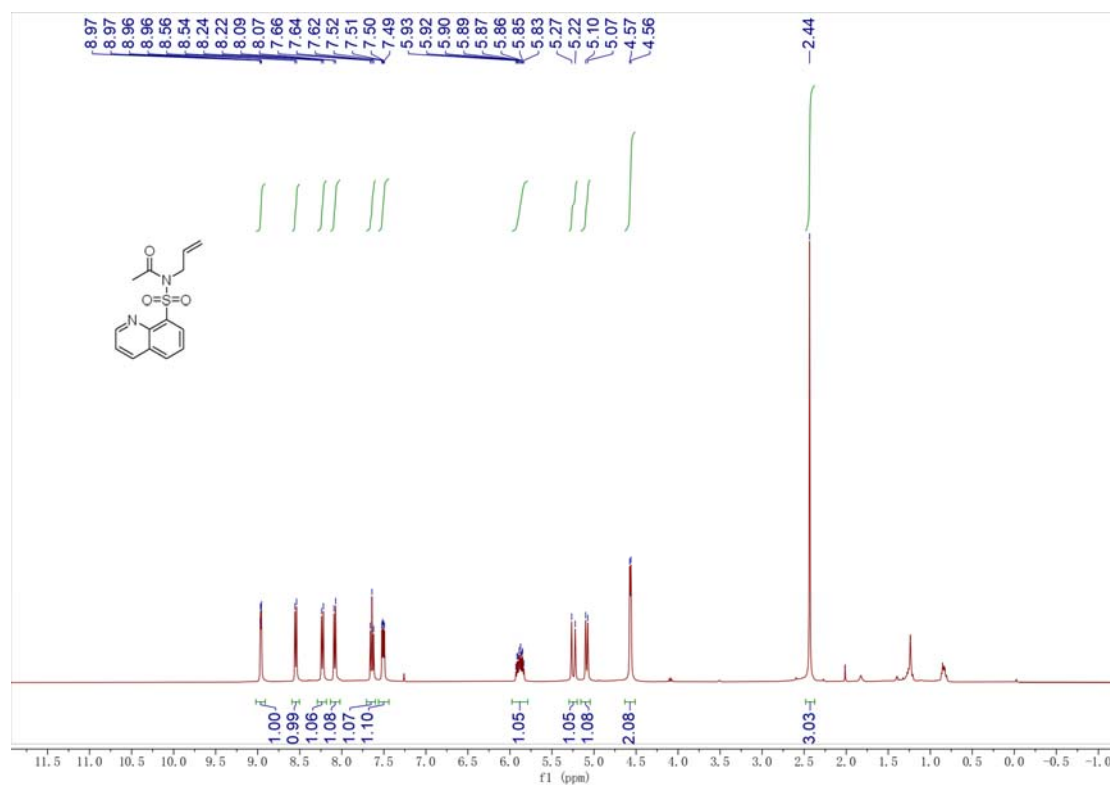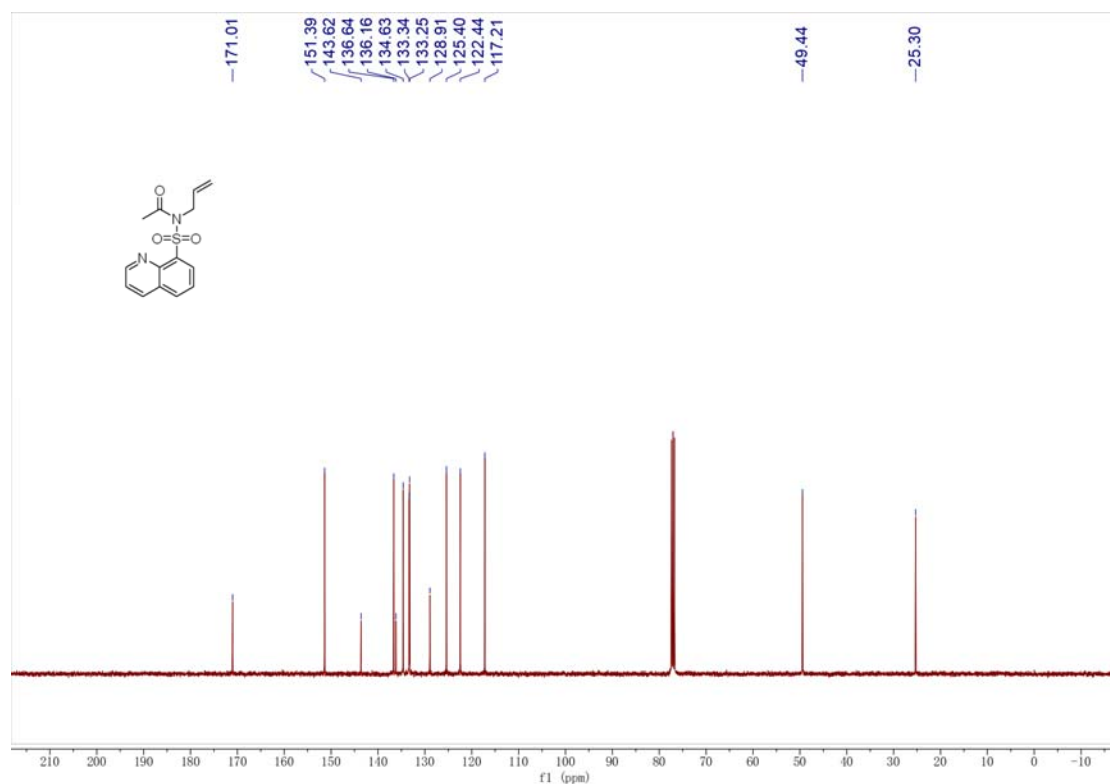

***N*-allyl-*N*-(naphthalen-1-ylsulfonyl)acetamide (1o)**

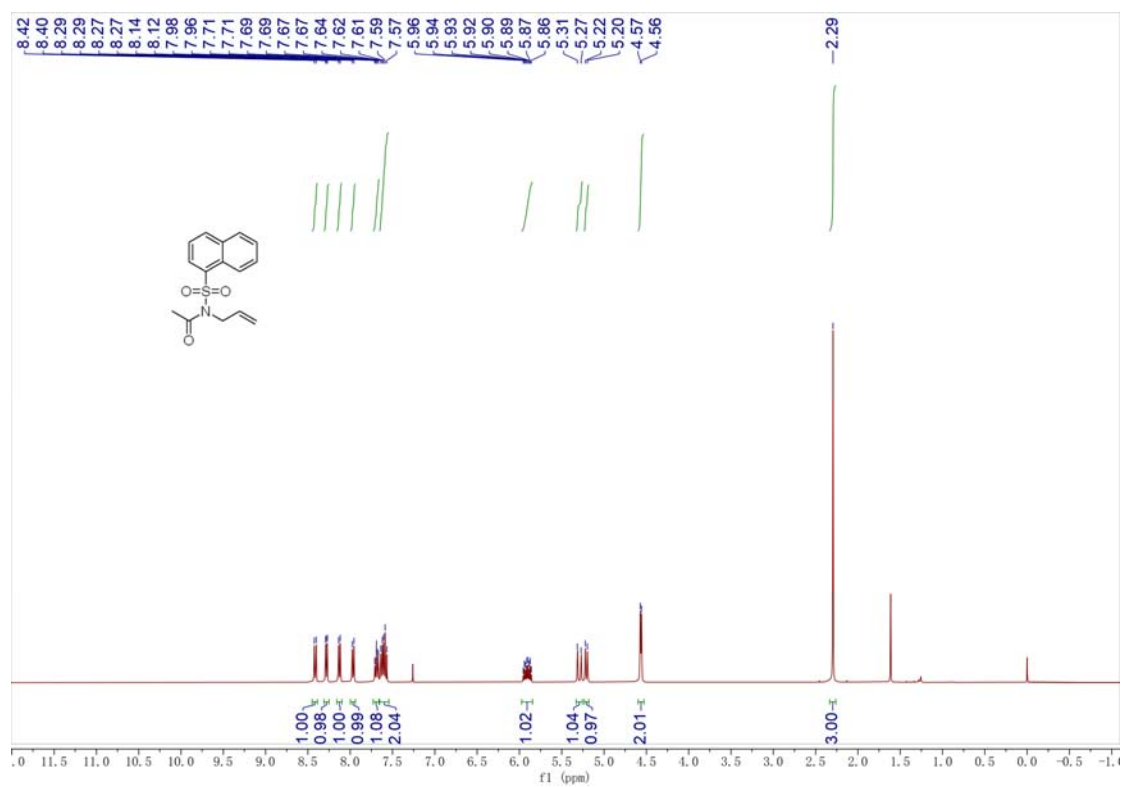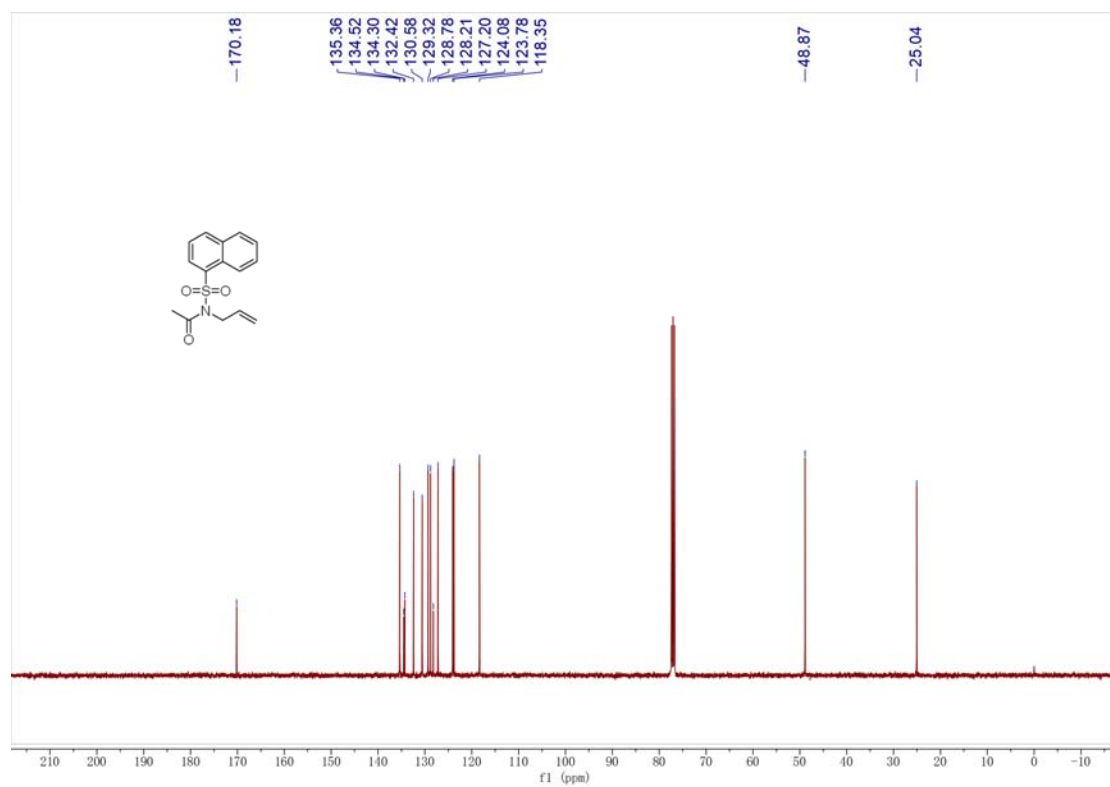

***N*-(benzo[d]thiazol-2-ylsulfonyl)-*N*-(2-methylallyl)acetamide (1p)**

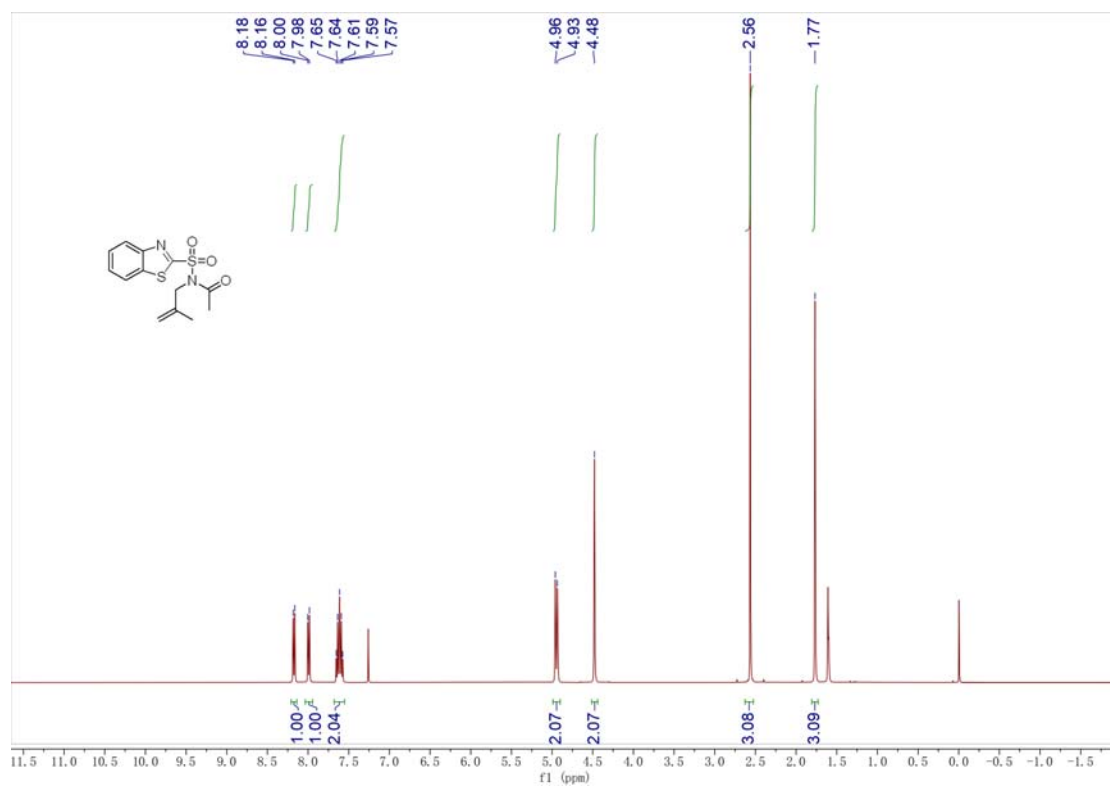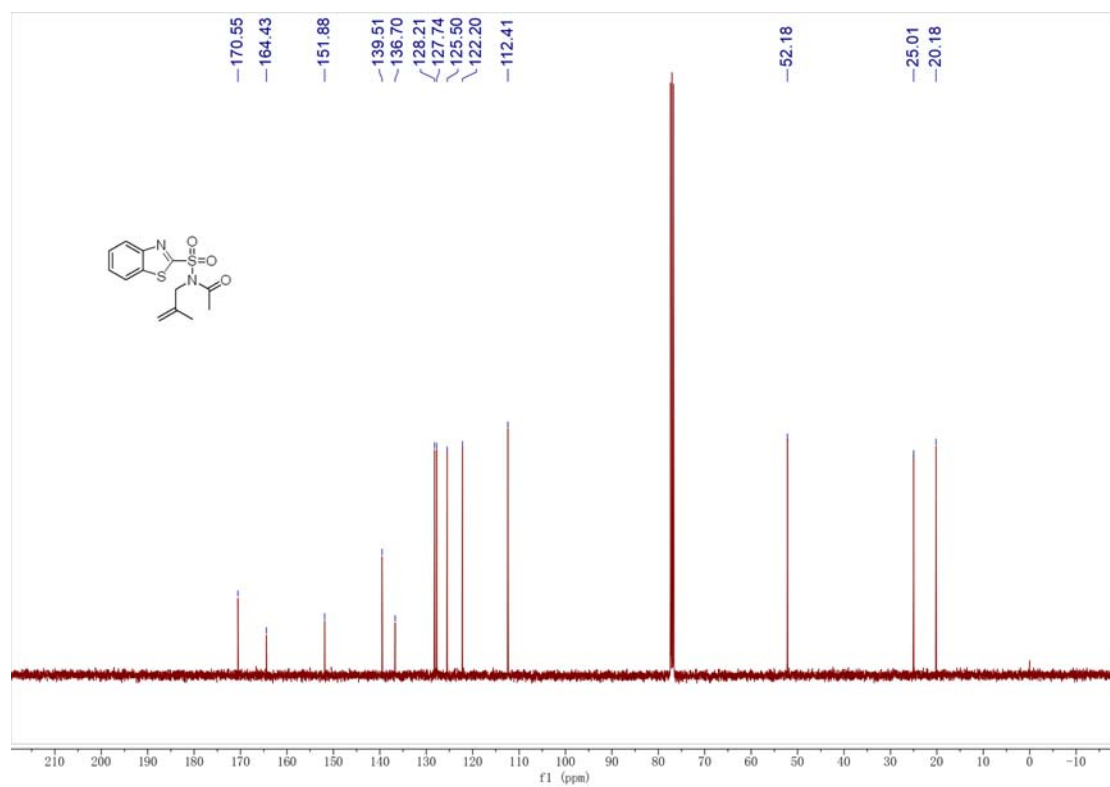



***N*-(benzo[d]thiazol-2-ylsulfonyl)-*N*-(but-3-en-1-yl)acetamide (1q)**

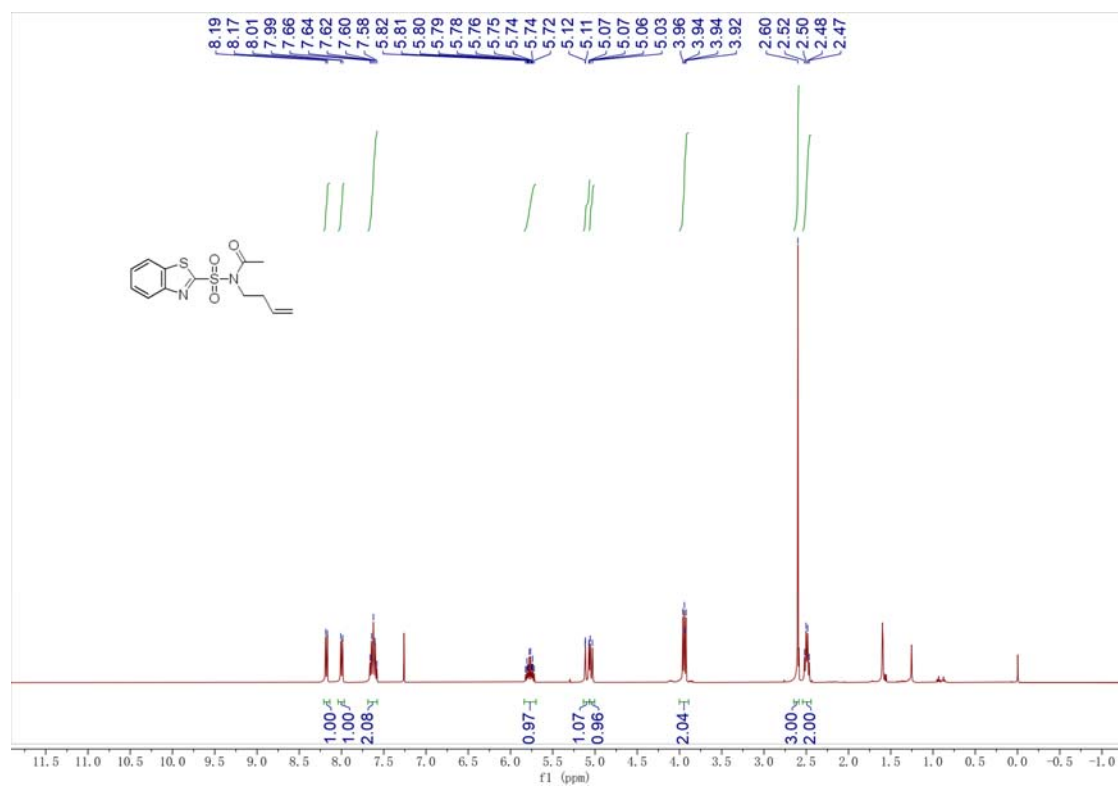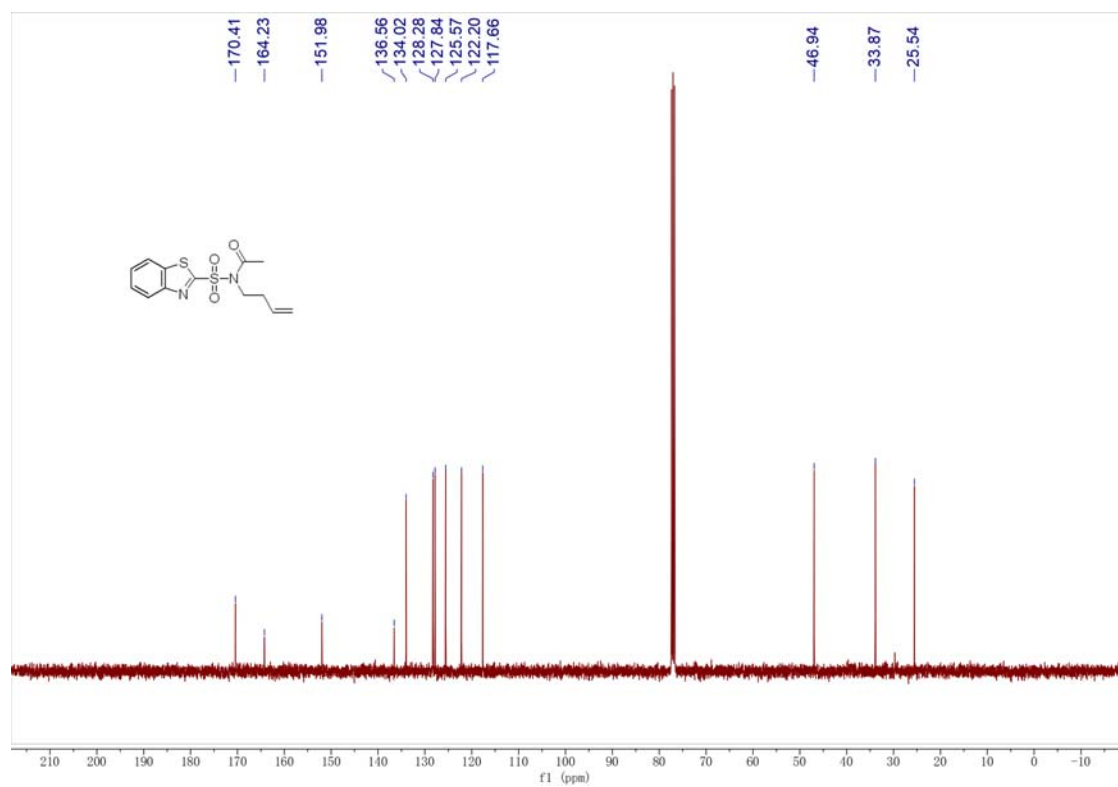

***N*-(benzo[d]thiazol-2-ylsulfonyl)-*N*-(pent-4-en-1-yl)acetamide**

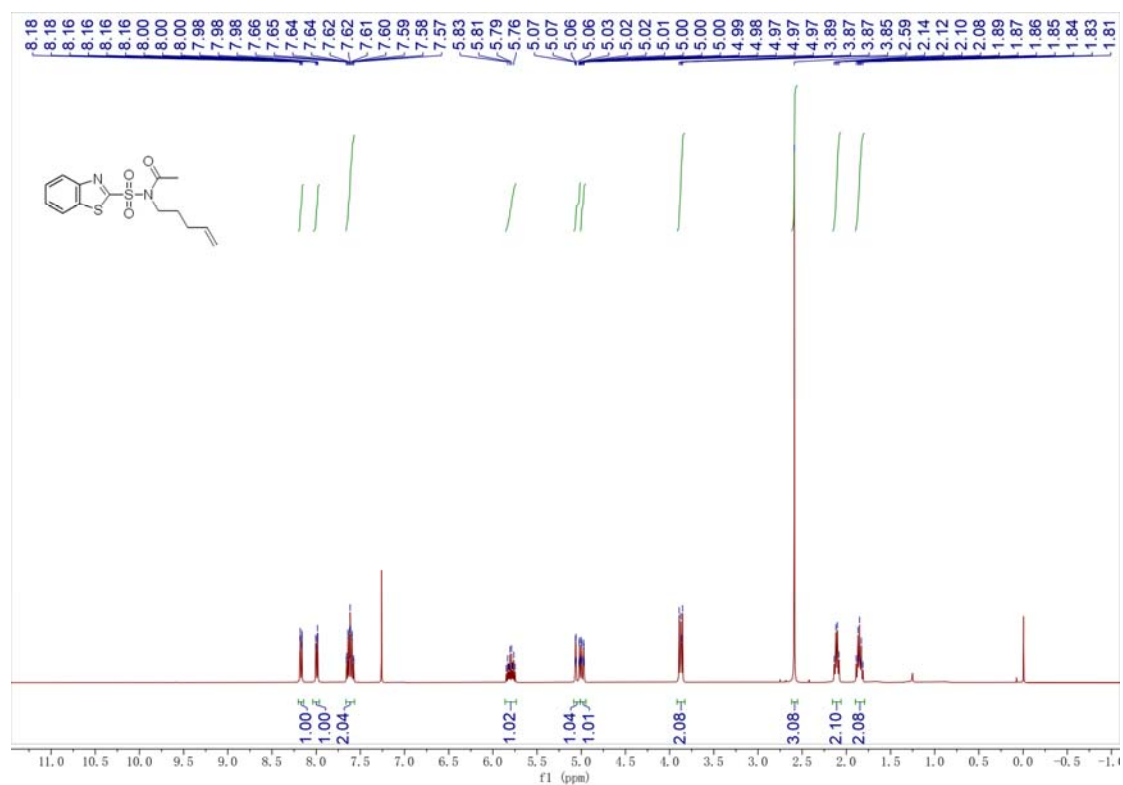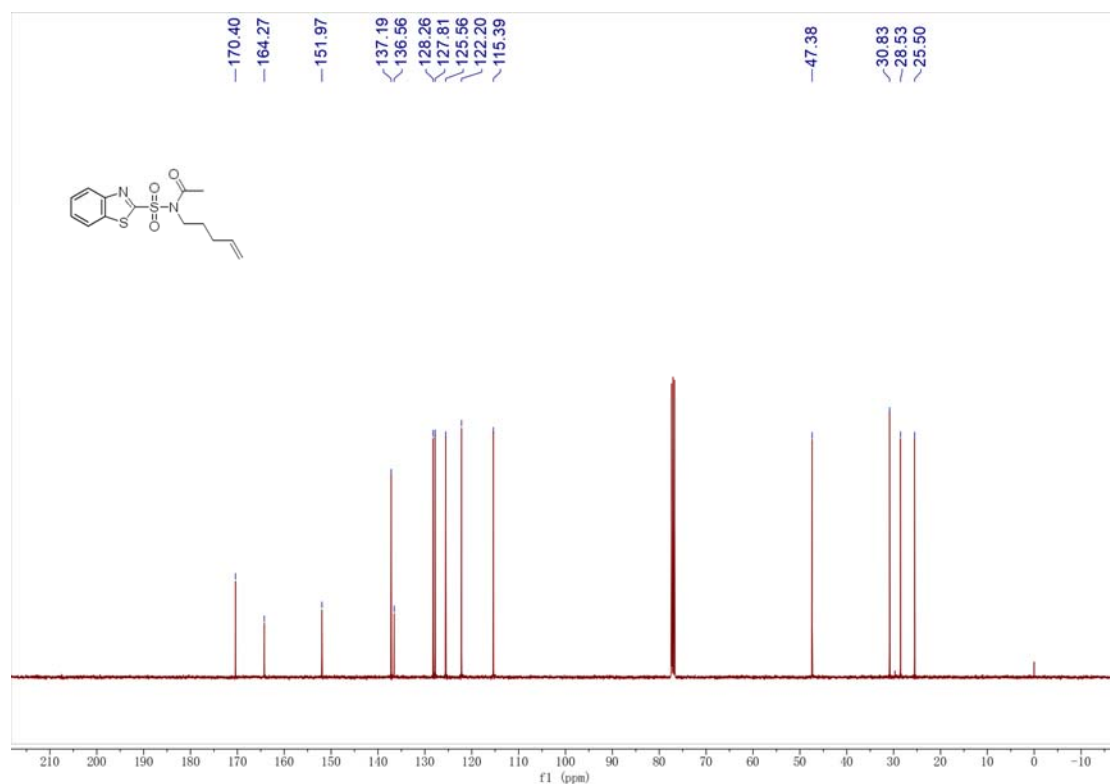

***N*-(benzo[d]thiazol-2-ylsulfonyl)-*N*-(prop-2-yn-1-yl)acetamide (1r)**

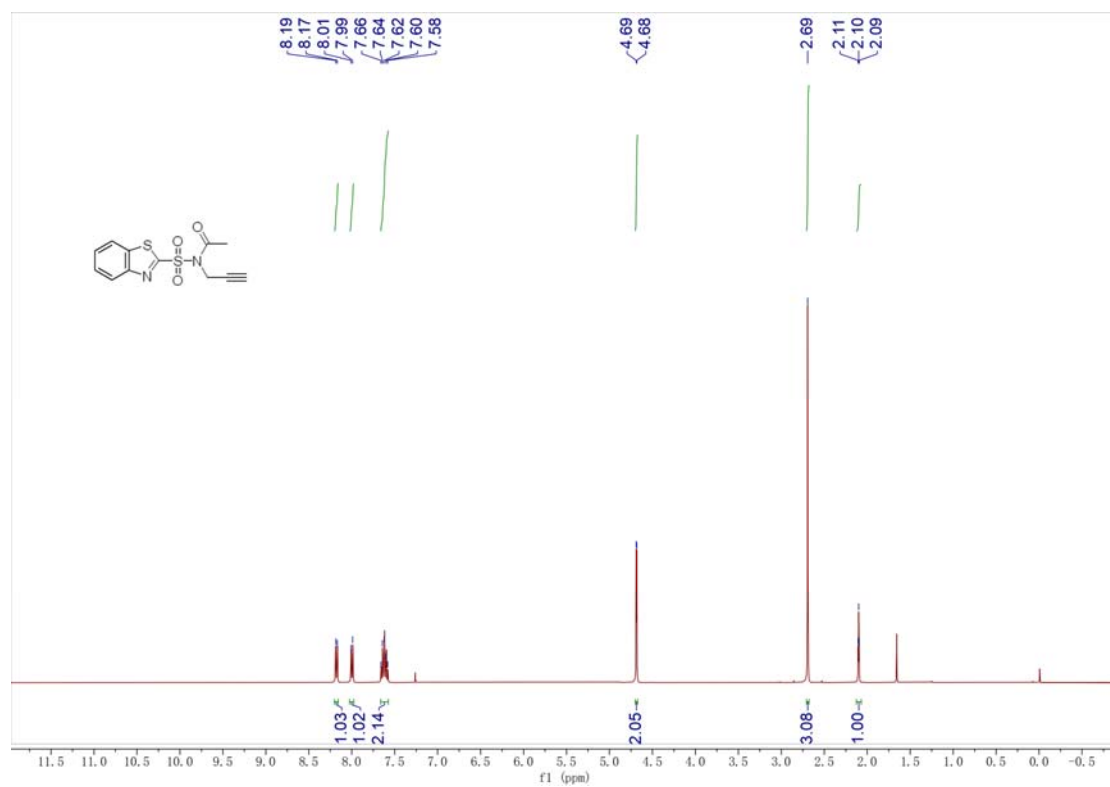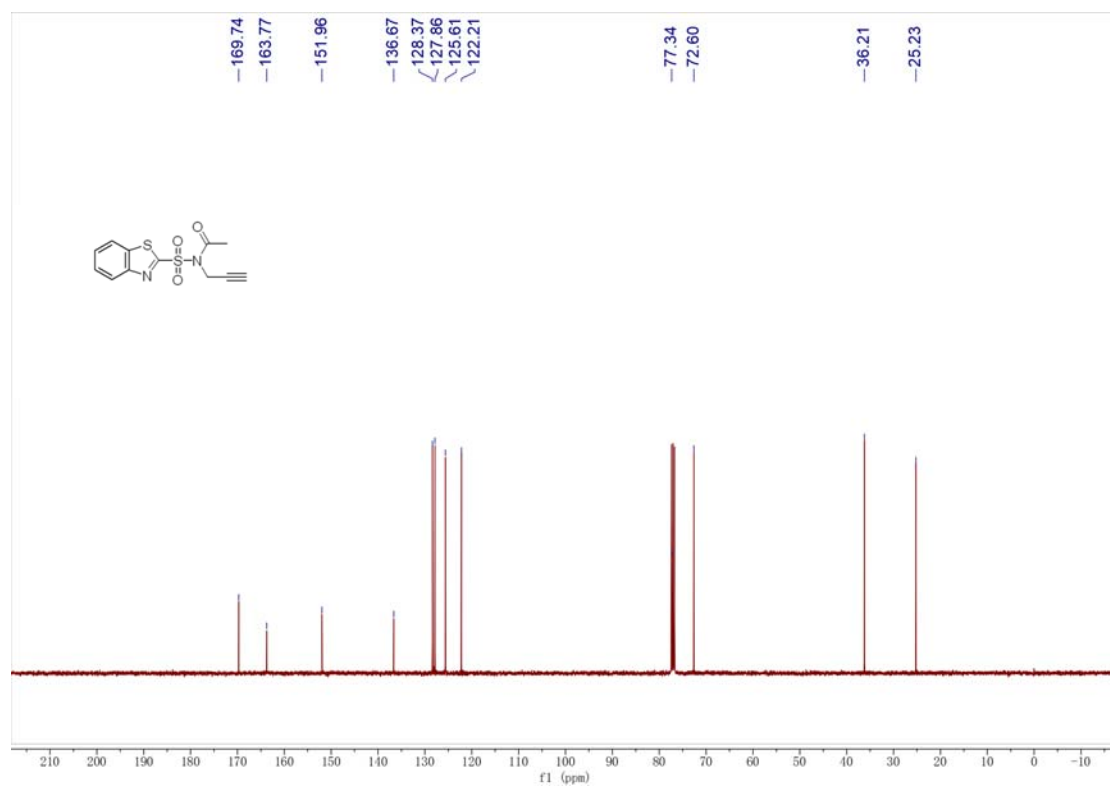

***N*-(benzo[d]thiazol-2-ylsulfonyl)-*N*-(3-methylbut-2-en-1-yl)acetamide (1t)**

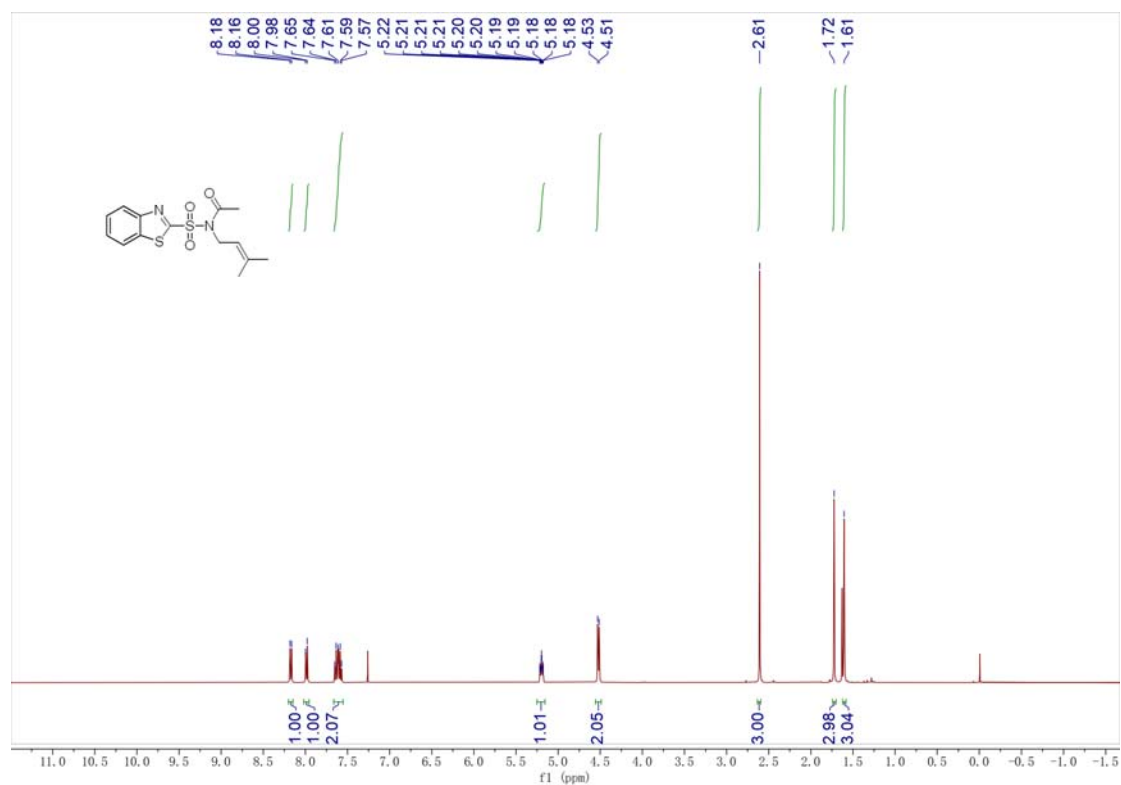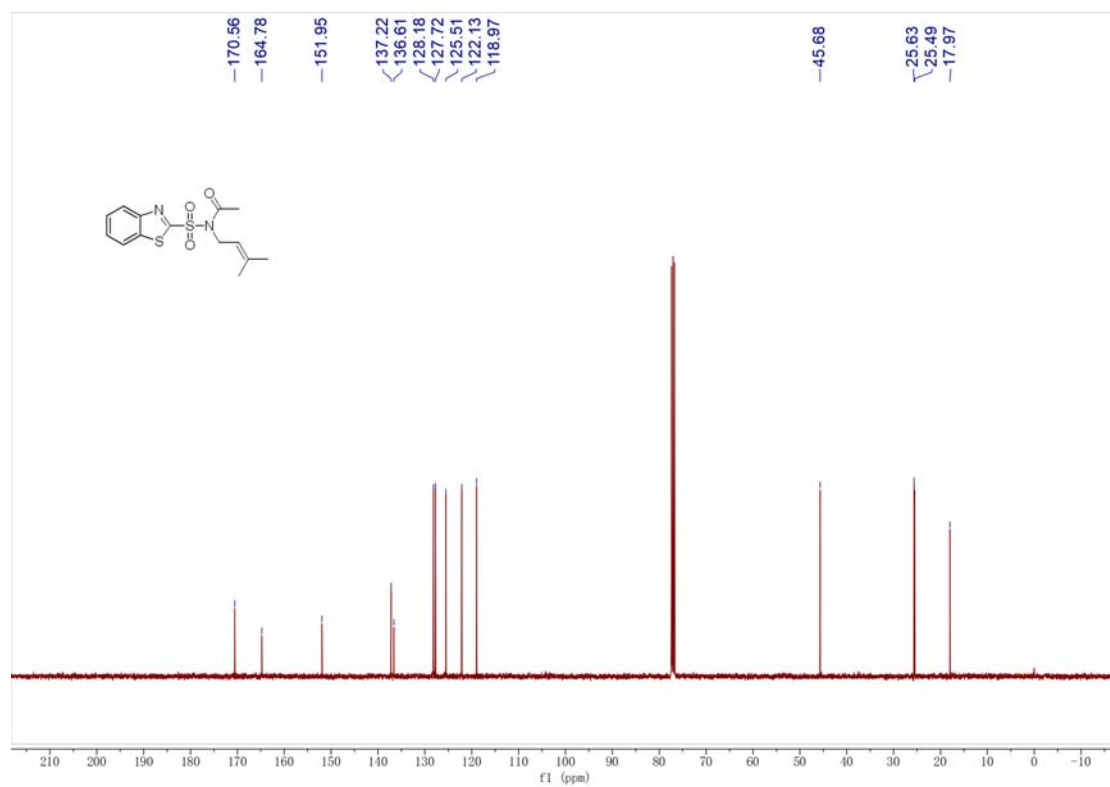

***N*-(benzo[d]thiazol-2-ylsulfonyl)-*N*-(cyclohex-2-en-1-yl)acetamide (1u):**

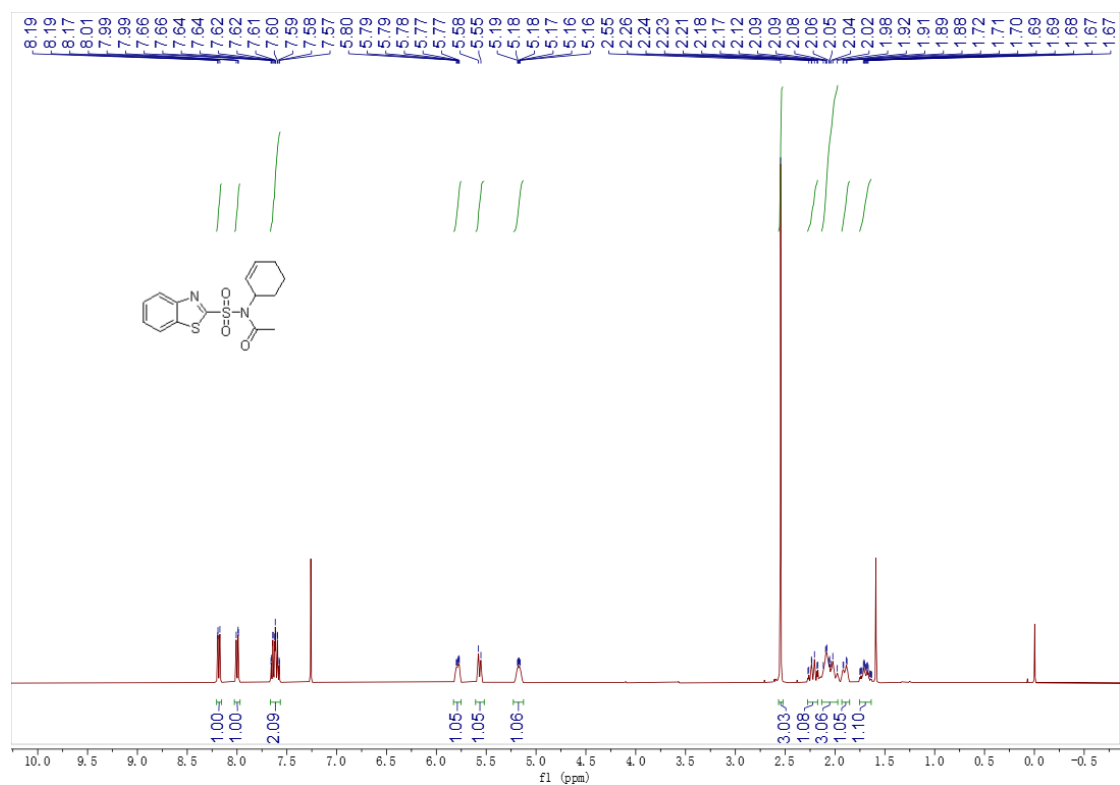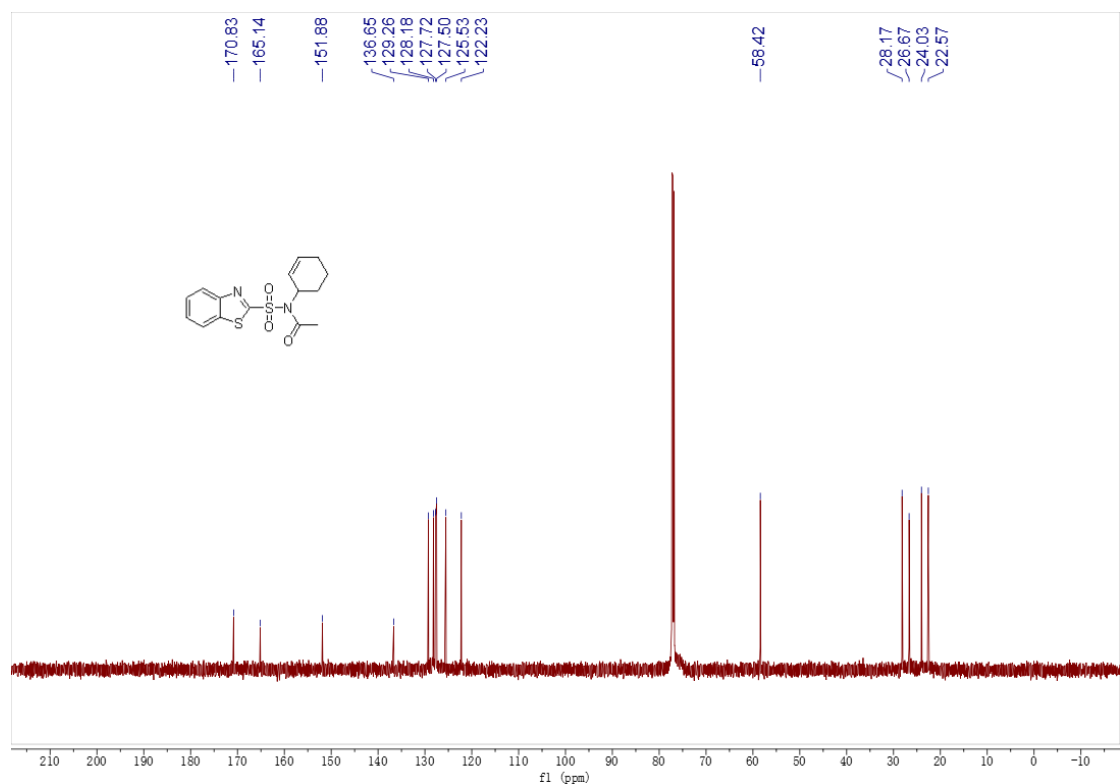

**(S)-N-(benzo[d]thiazol-2-ylsulfonyl)-N-(but-3-en-2-yl)acetamide (1v)**

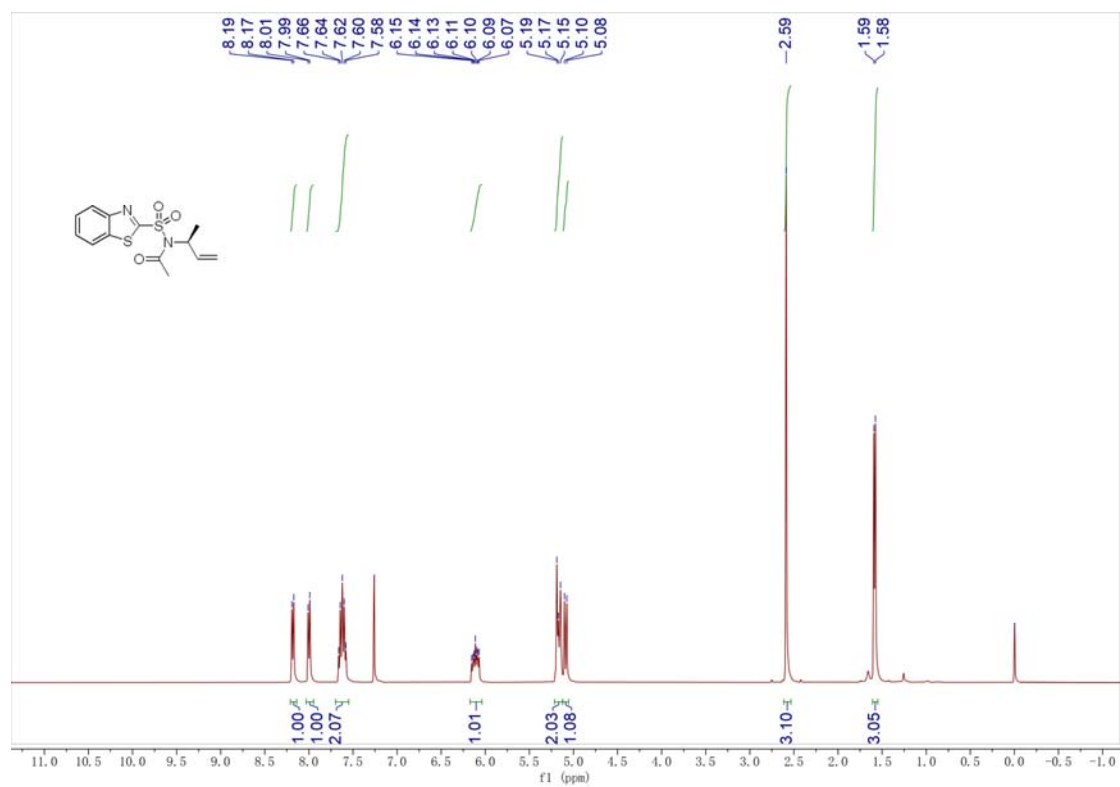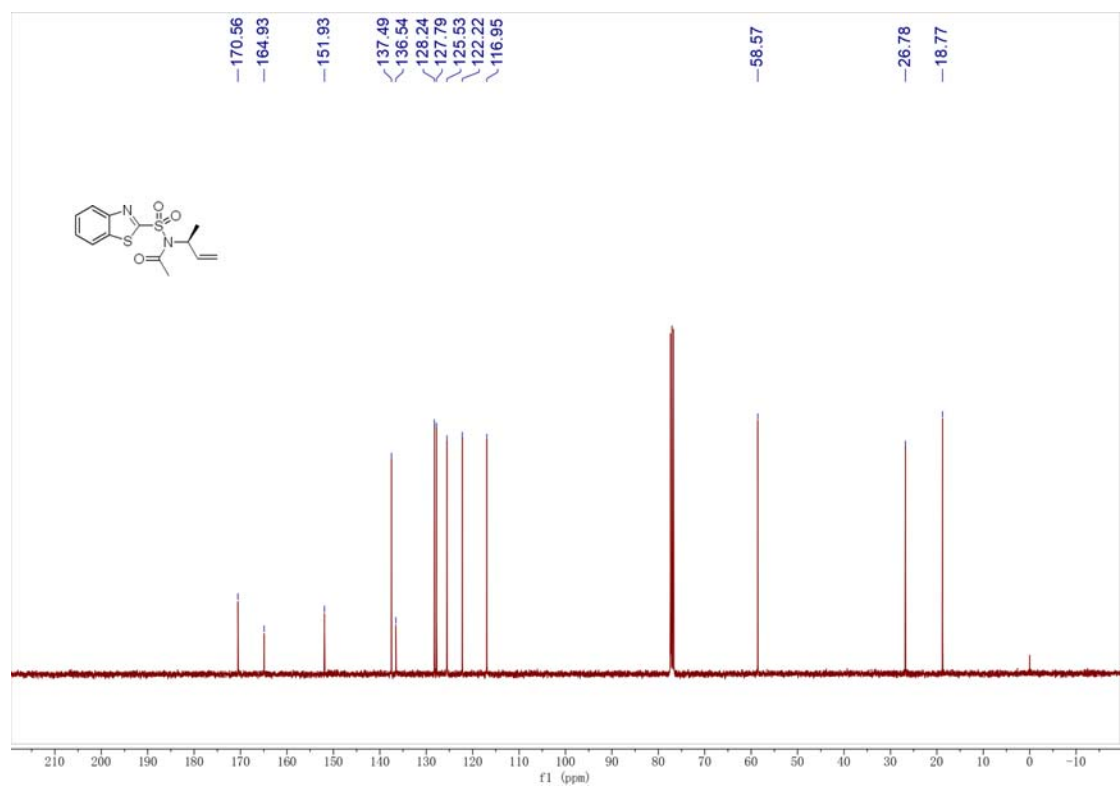

### Tert-butyl (benzo[d]thiazol-2-ylsulfonyl)(but-3-en-2-yl)carbamate (1v')

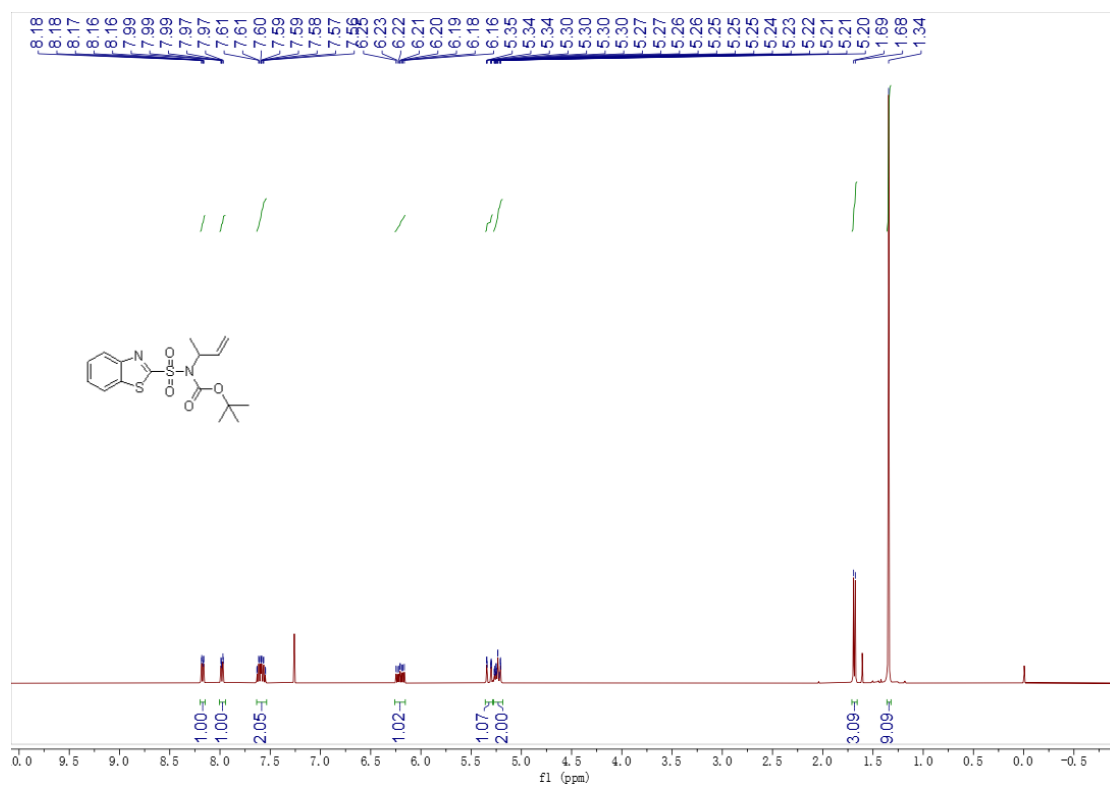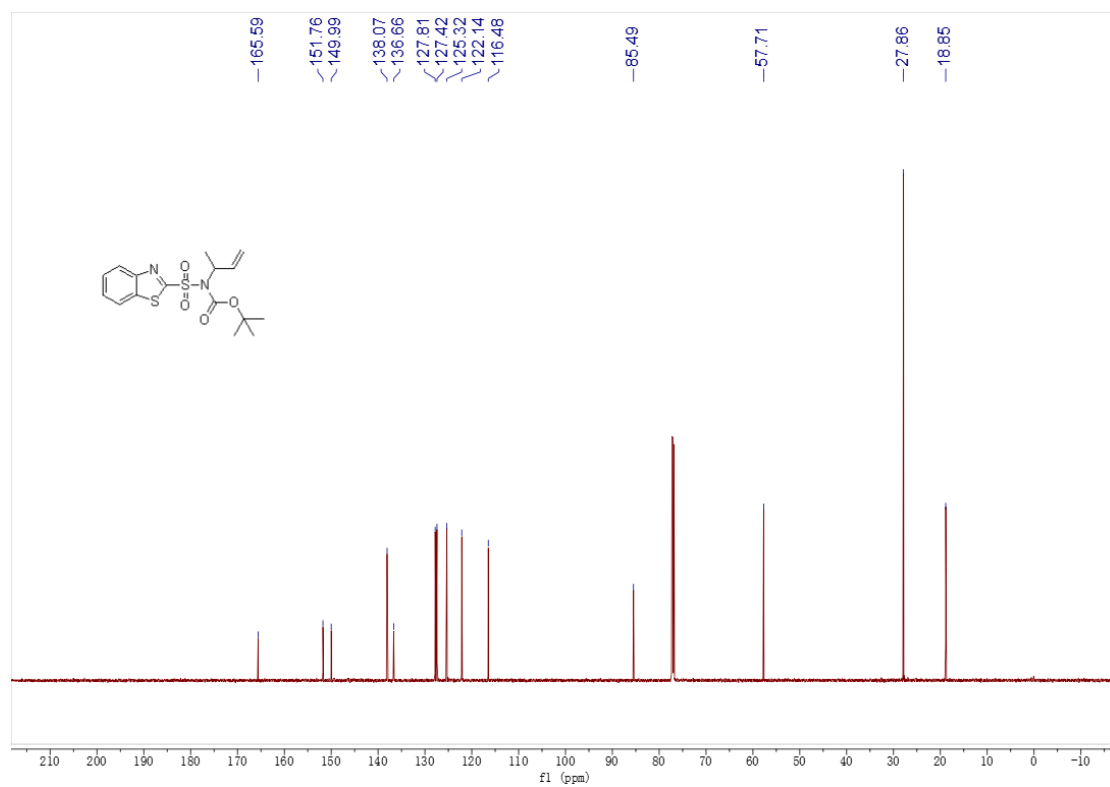

**(S)-N-(benzo[d]thiazol-2-ylsulfonyl)-N-(1-phenylbut-3-en-2-yl)acetamide (1w)**

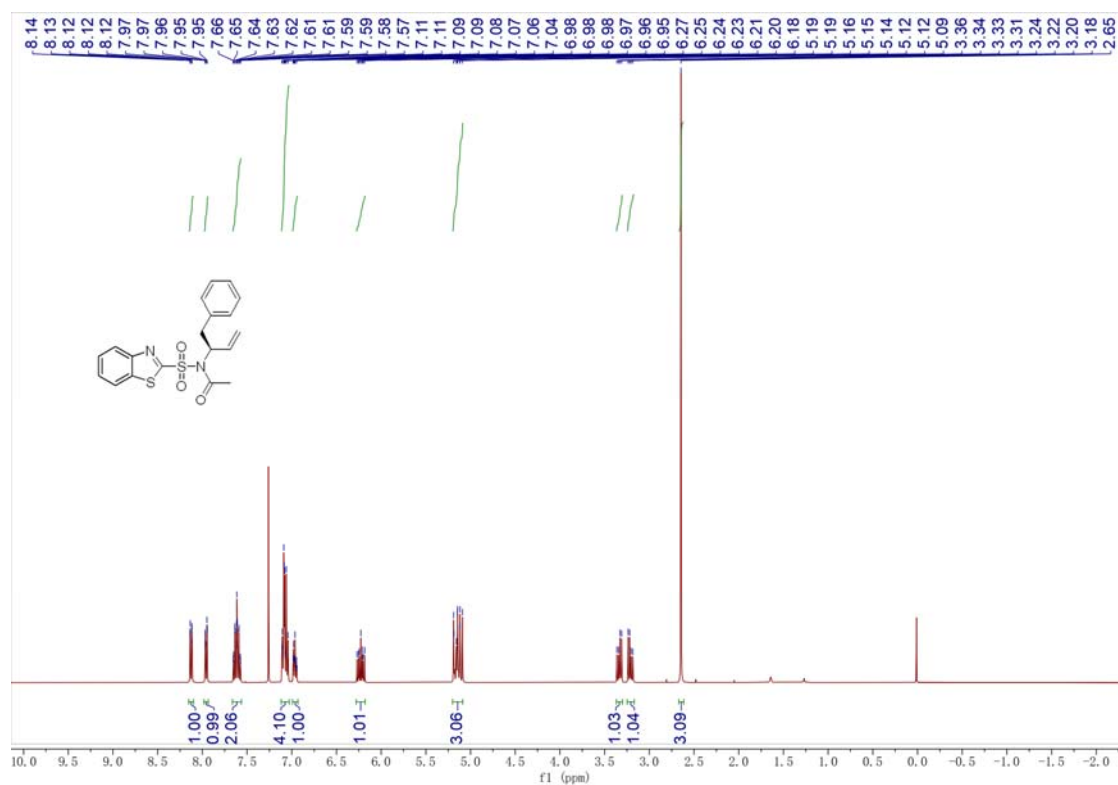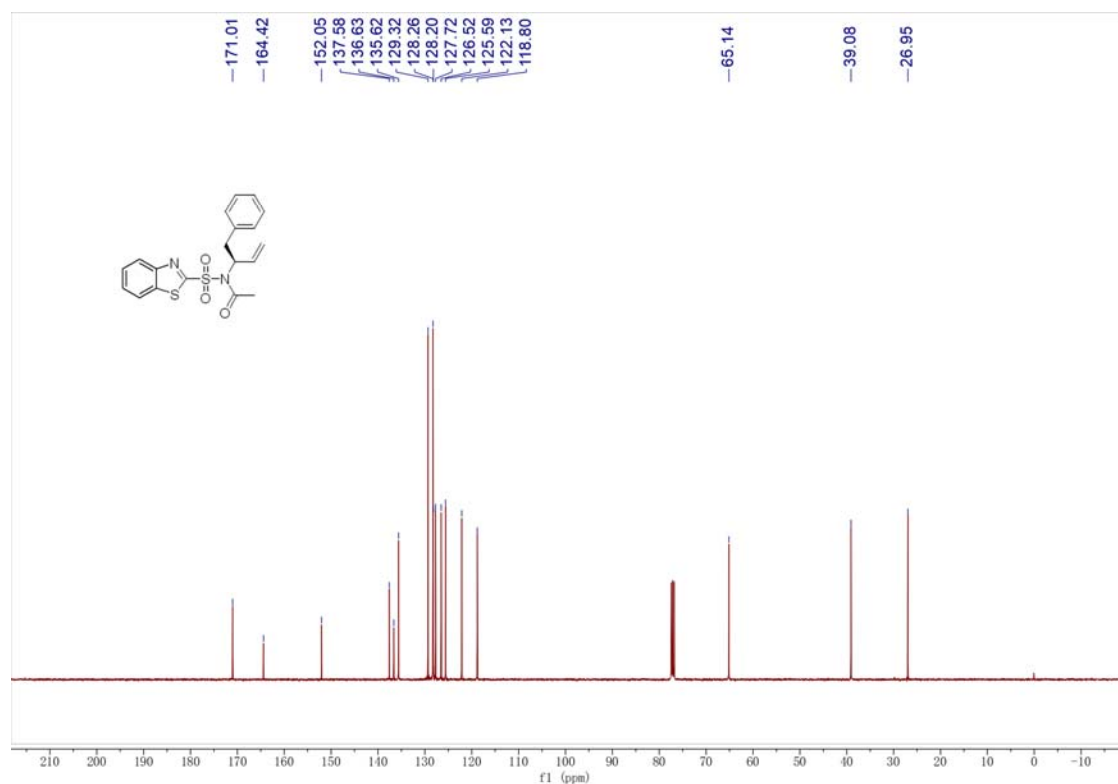



**(S)-N-(benzo[d]thiazol-2-ylsulfonyl)-N-(1-phenylallyl)acetamide (1x)**

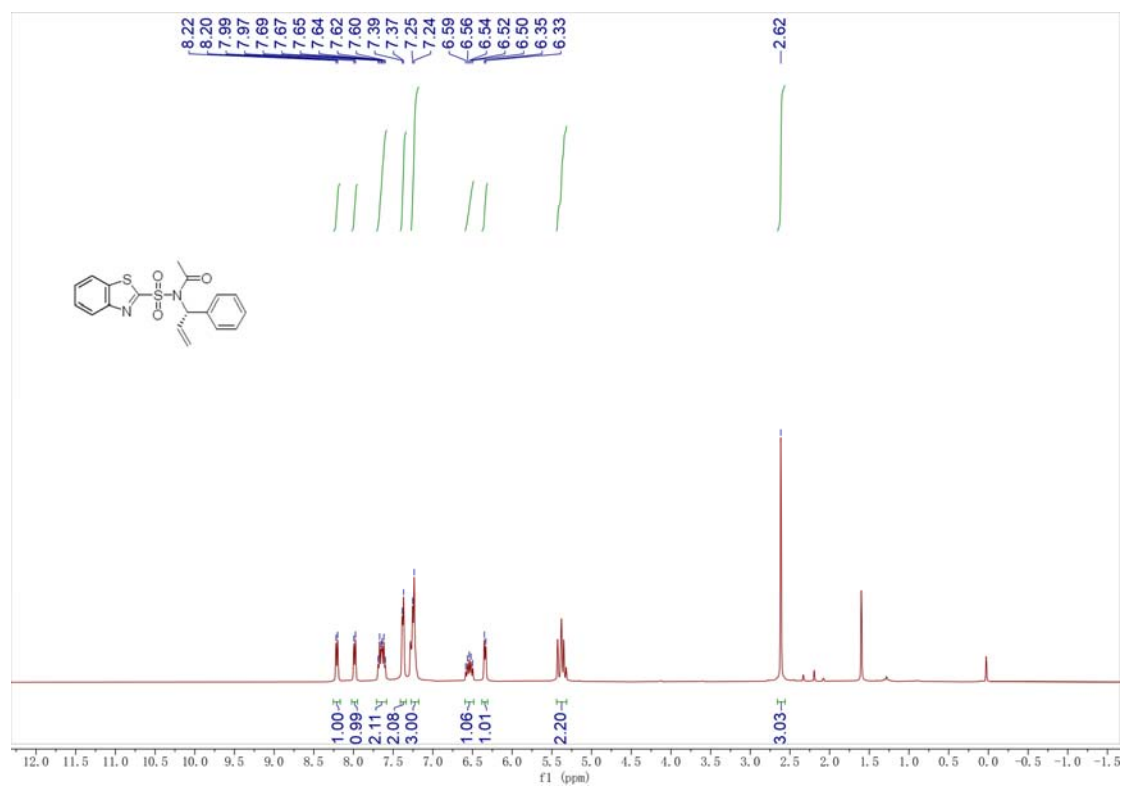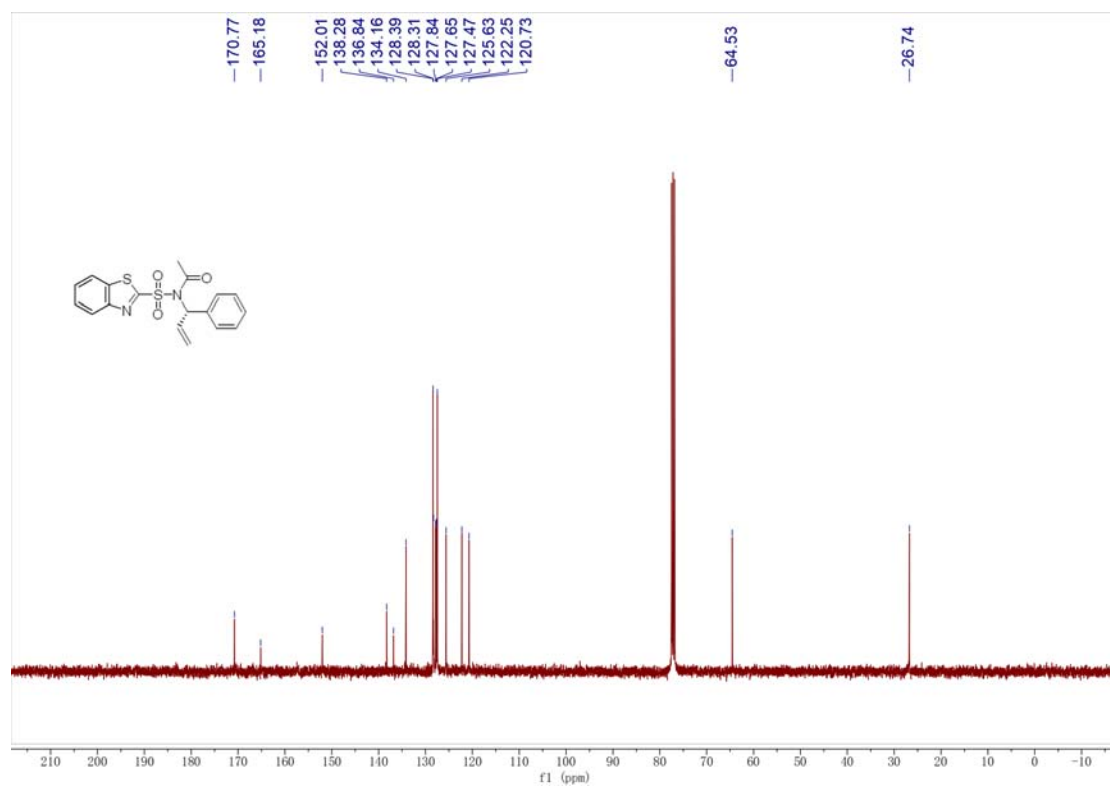

**tert-butyl (2-(*N*-allylthiazole-2-sulfonamido)-2-oxoethyl)(methyl)carbamate (1y)**

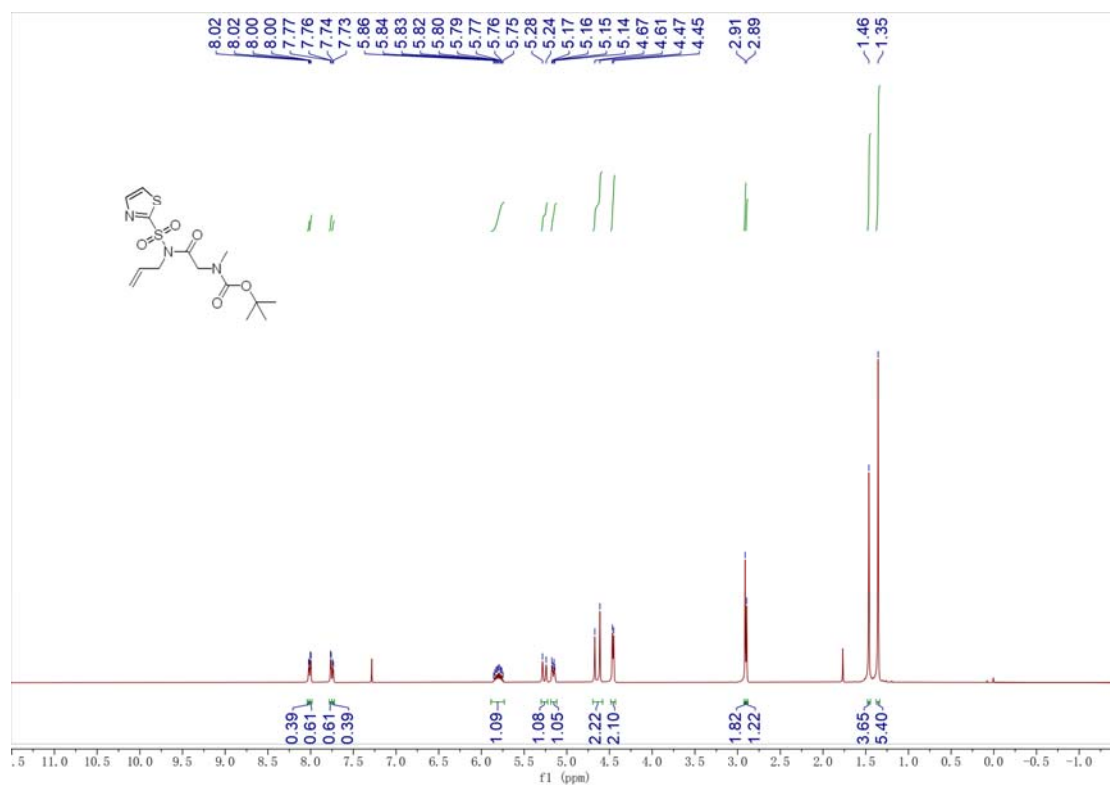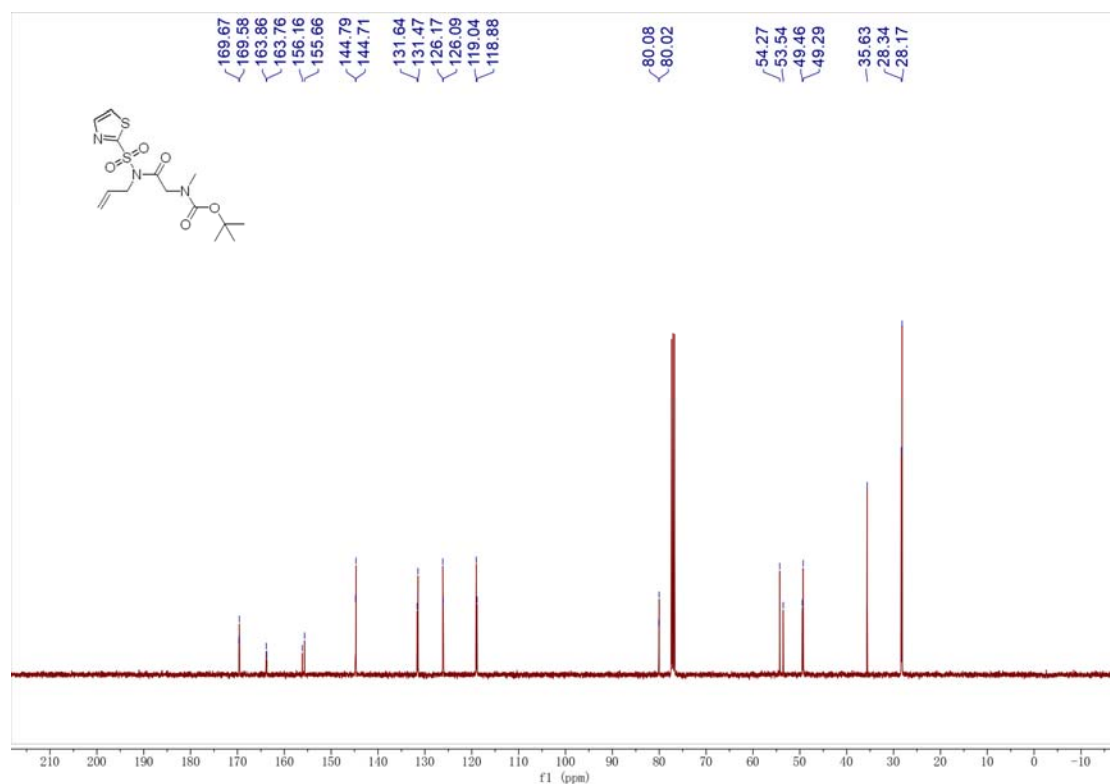

***N*-allyl-*N*-((5-chlorothiophen-2-yl)sulfonyl)-2-(1,3-dioxisoindolin-2-yl)propenamide (1z)**

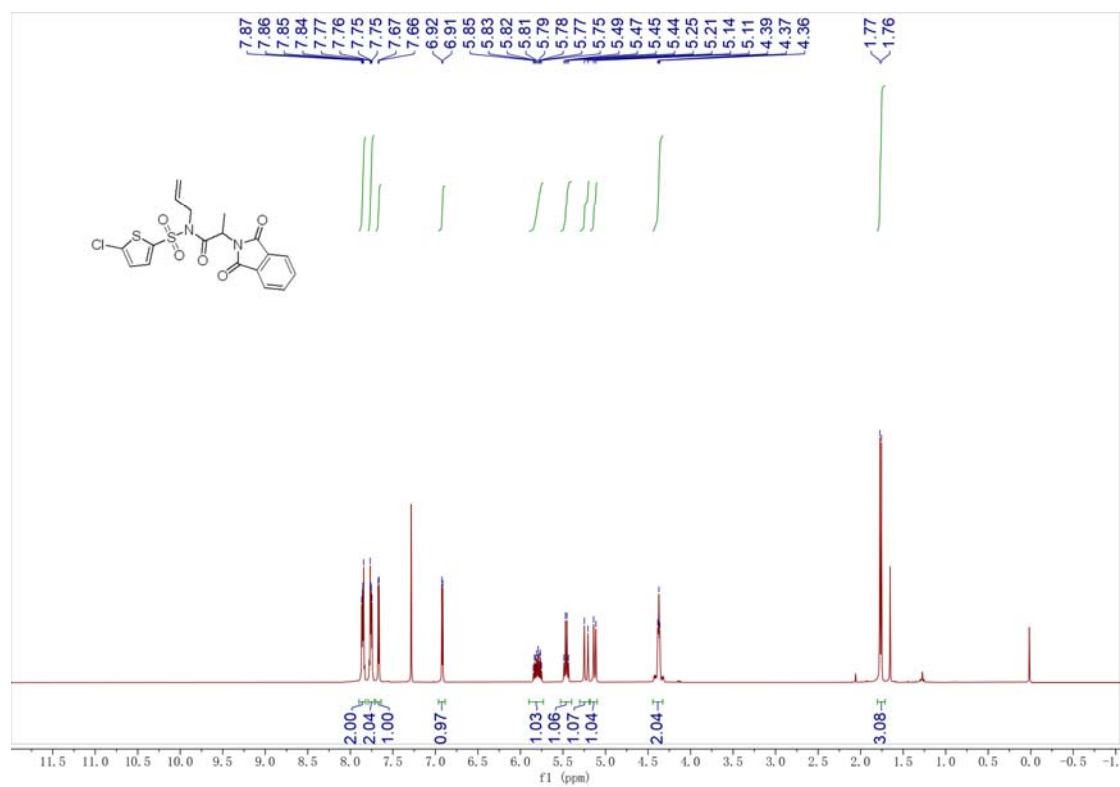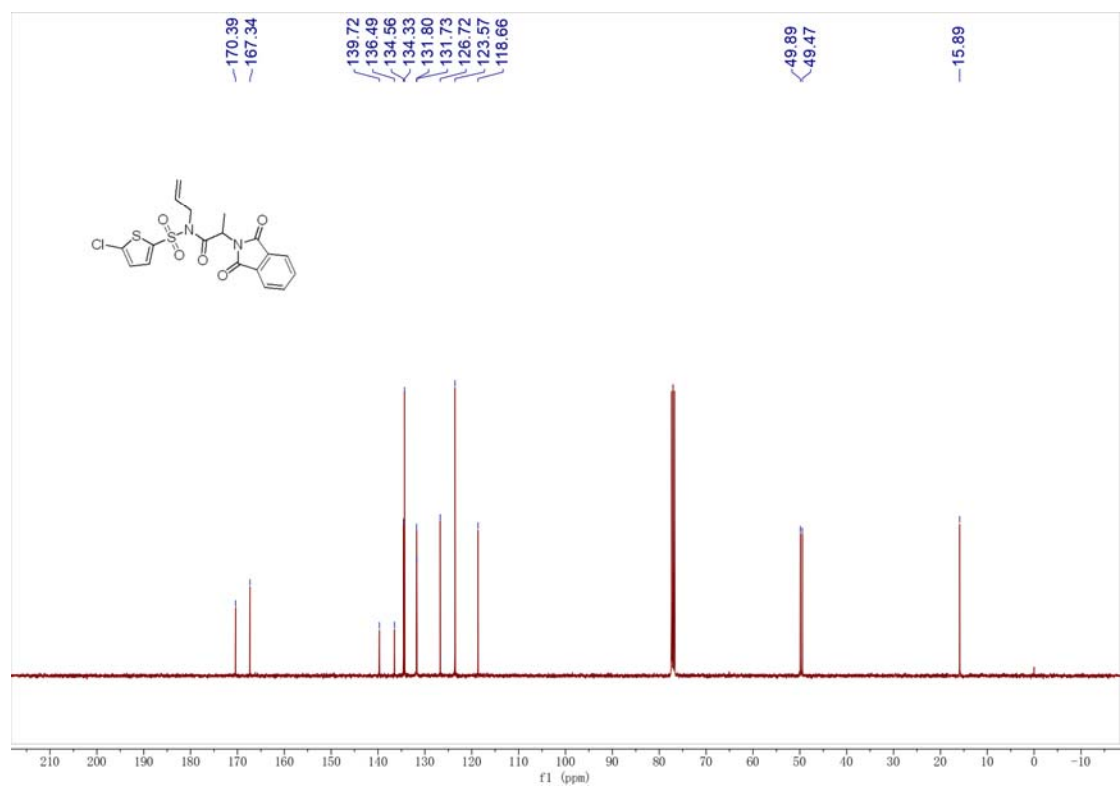

tert-butyl (3-(*N*-allylthiazole-2-sulfonamido)-3-oxopropyl)(methyl)carbamate (1z1)

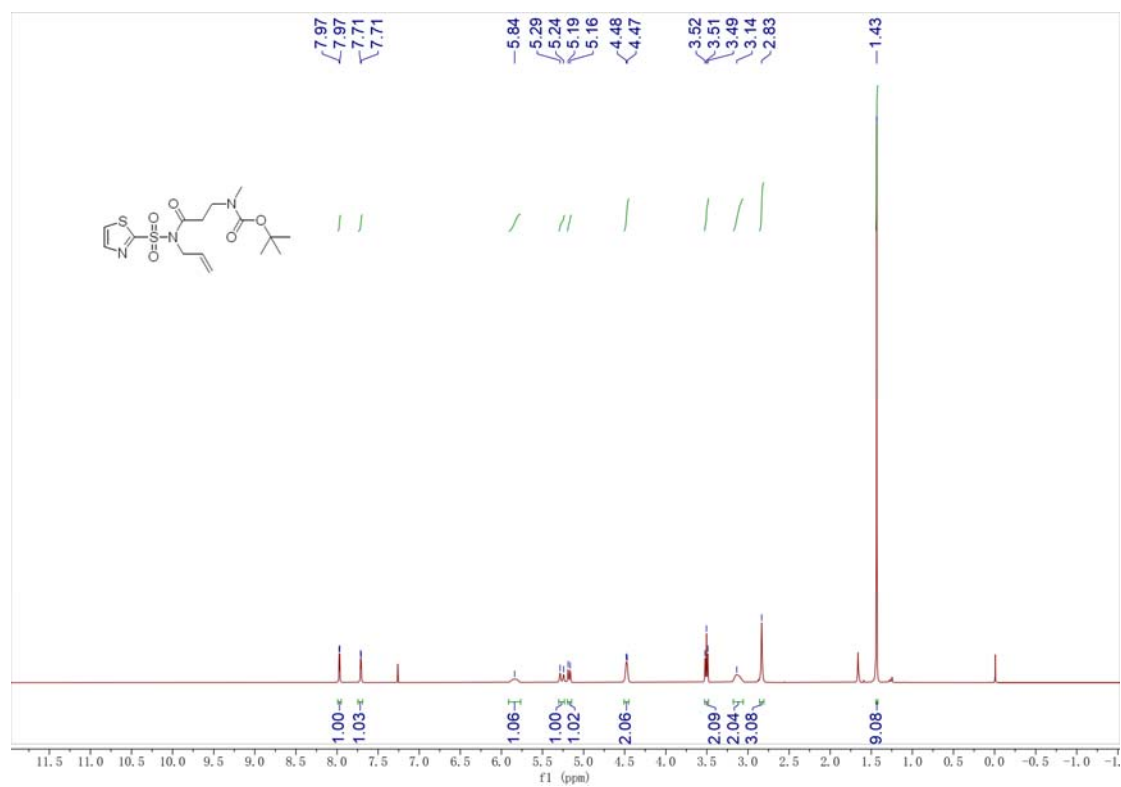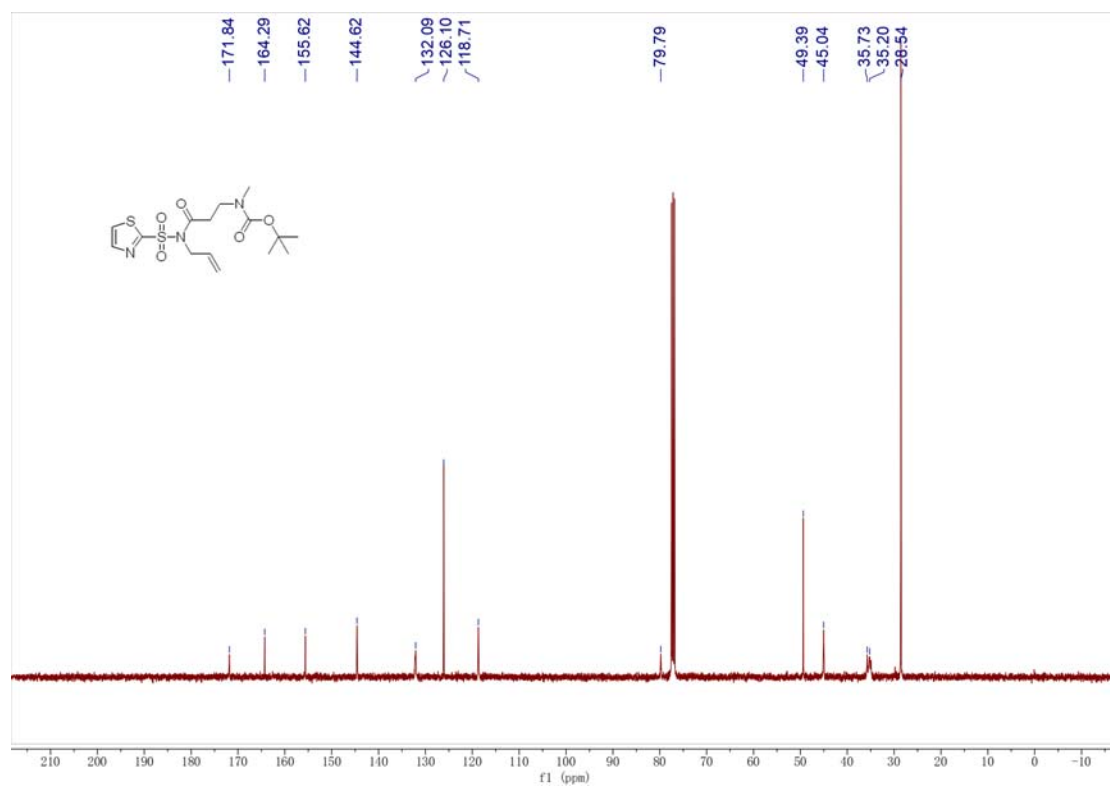

benzyl 3-(allyl(benzo[d]thiazol-2-ylsulfonyl)carbamoyl)azetidine-1-carboxylate (1z2)

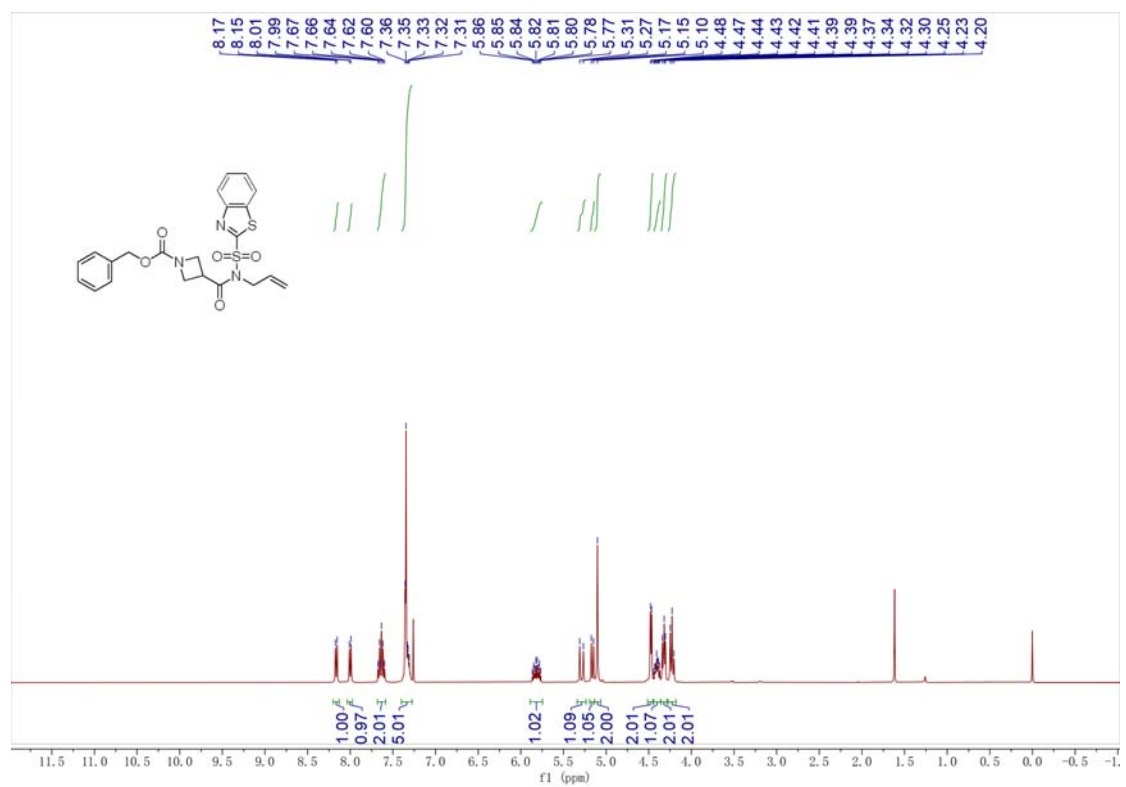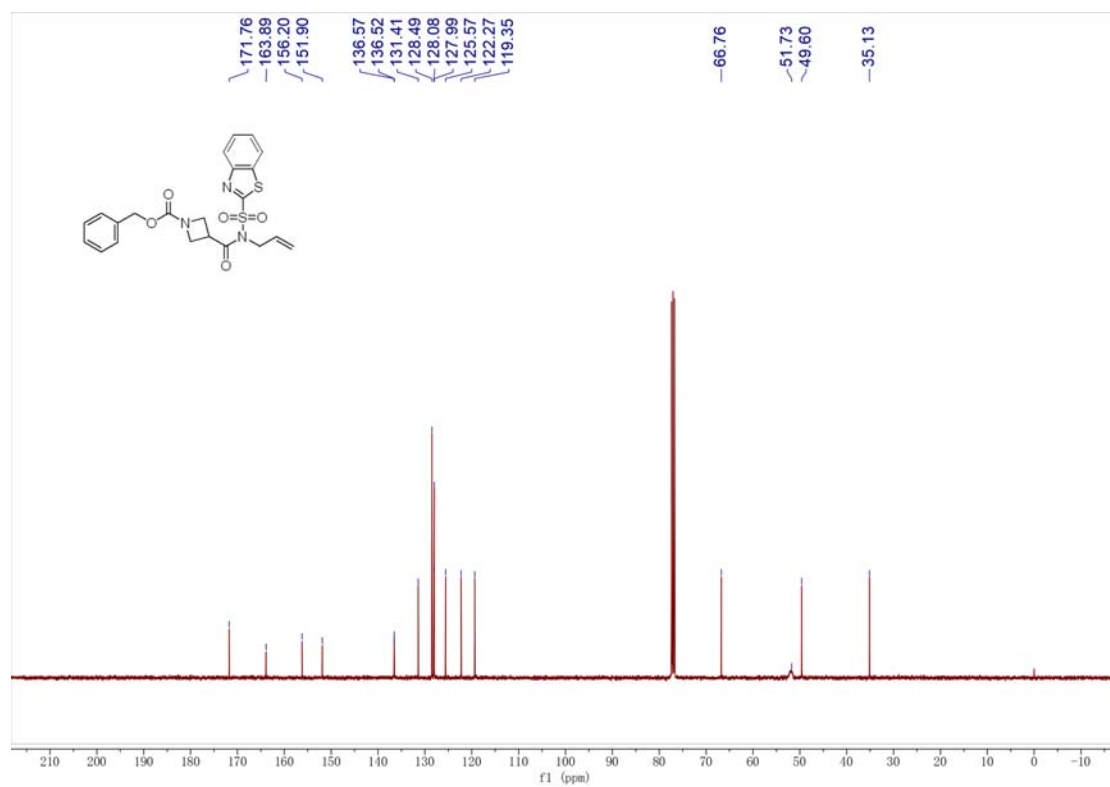

benzyl (4-(N-allylthiazole-2-sulfonamido)-4-oxobutyl)(methyl)carbamate (1z3)

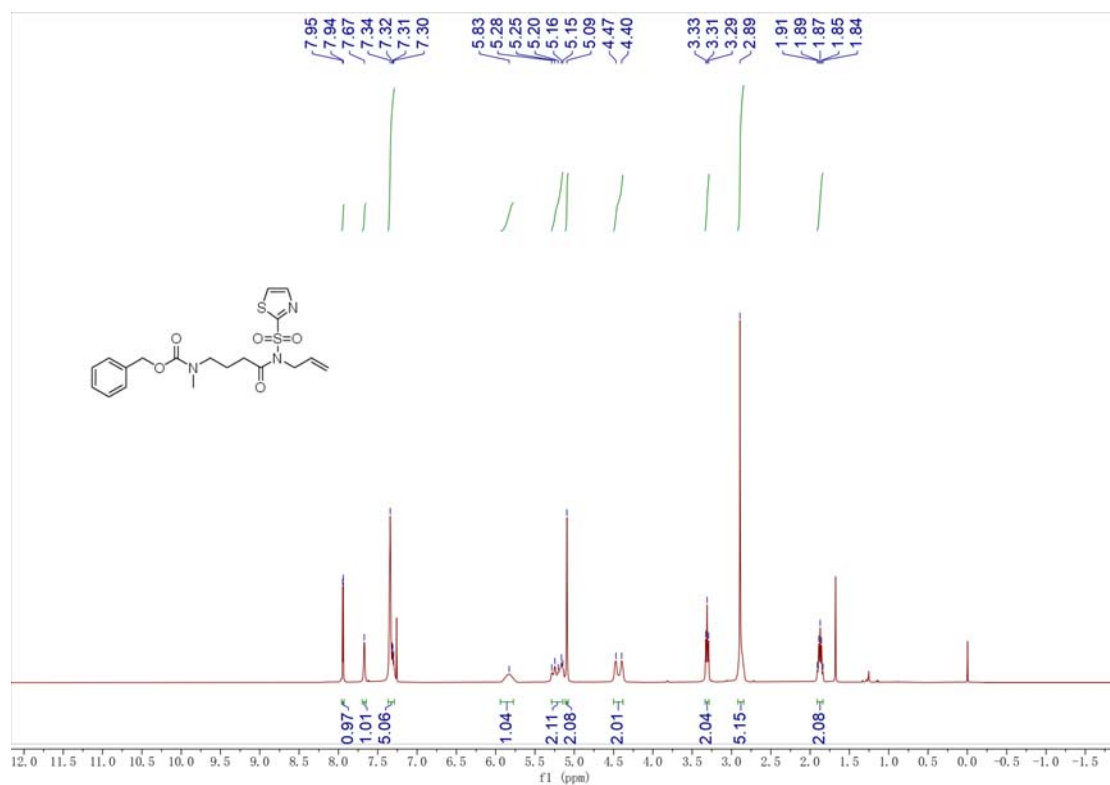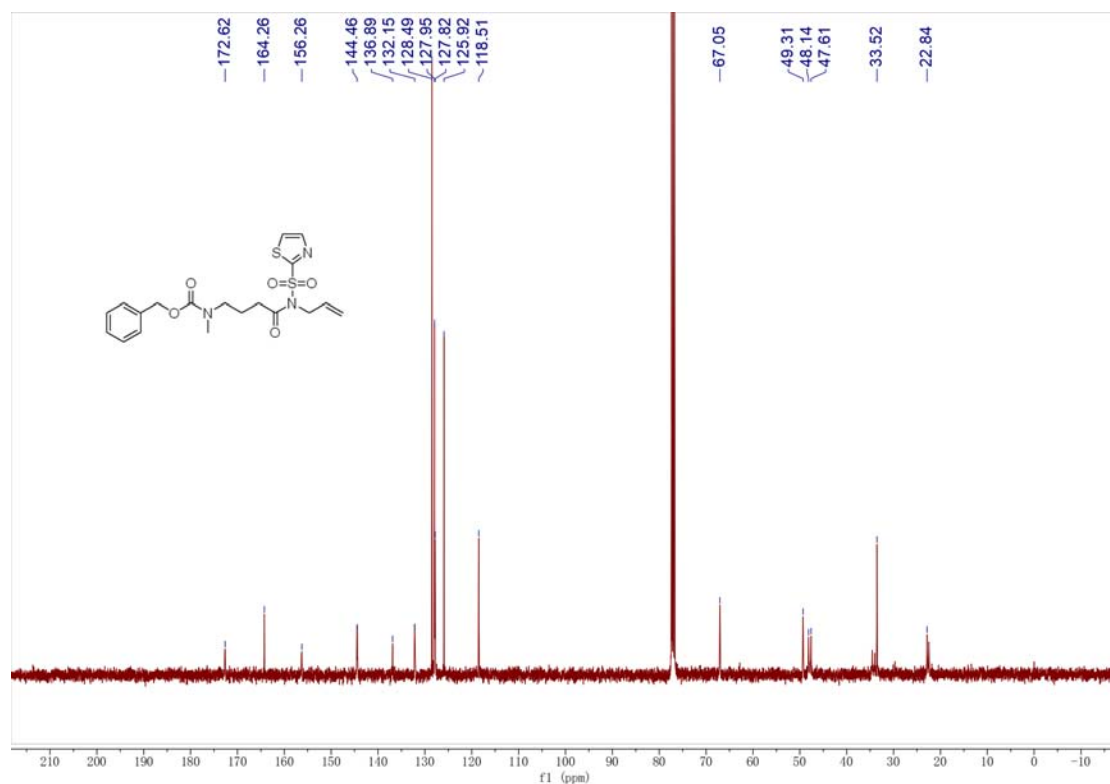

***N*-allyl-*N*-((5-chlorothiophen-2-yl)sulfonyl)-4-oxopentanamide (1z4)**

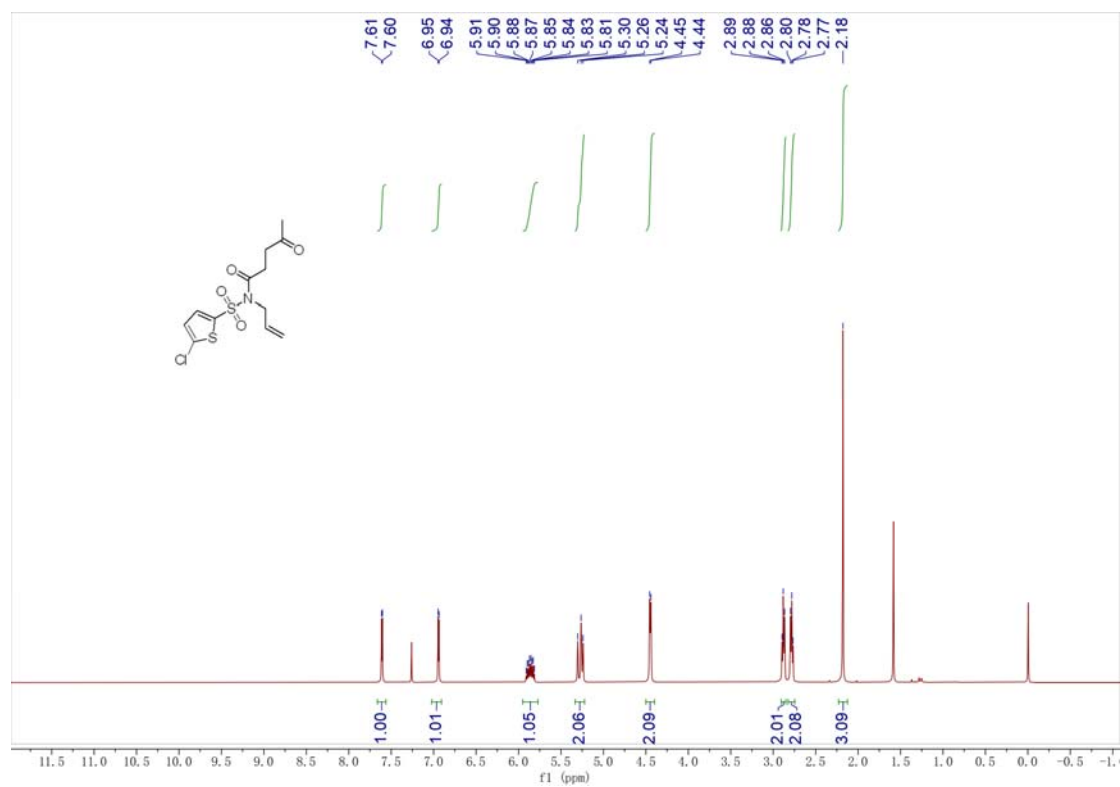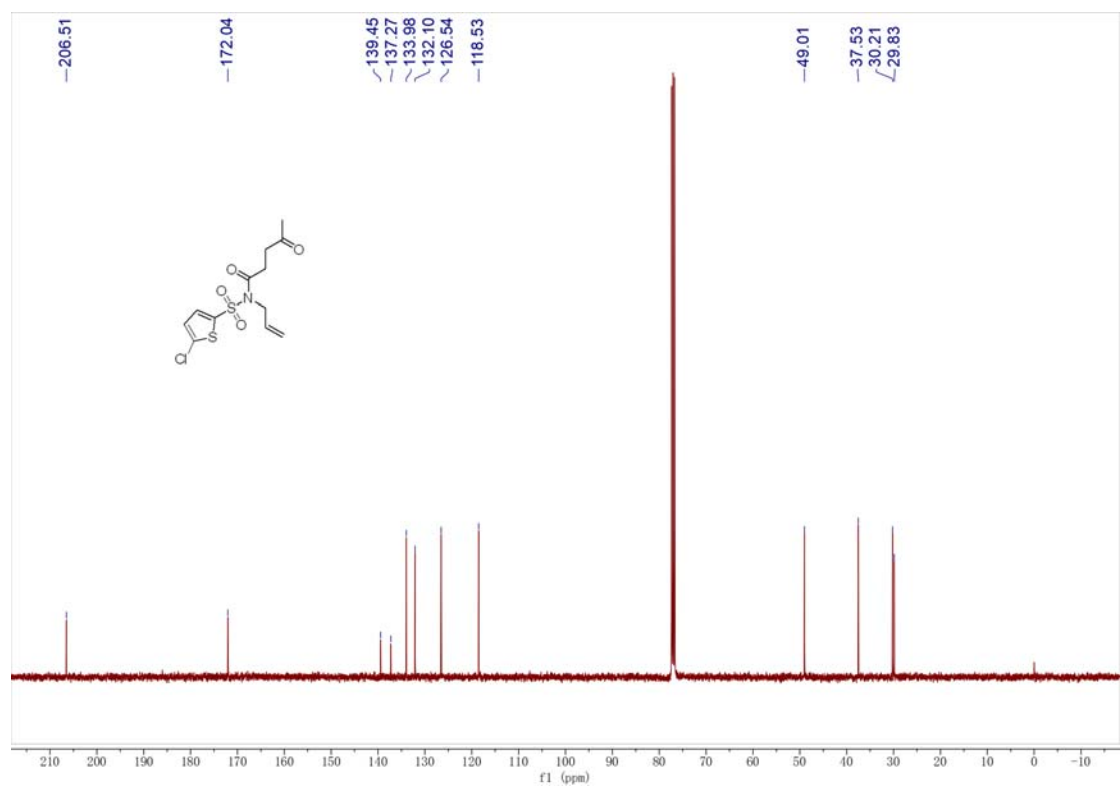

***N*-allyl-*N*-((5-chlorothiophen-2-yl)sulfonyl)-4-oxopentanamide (1z5)**

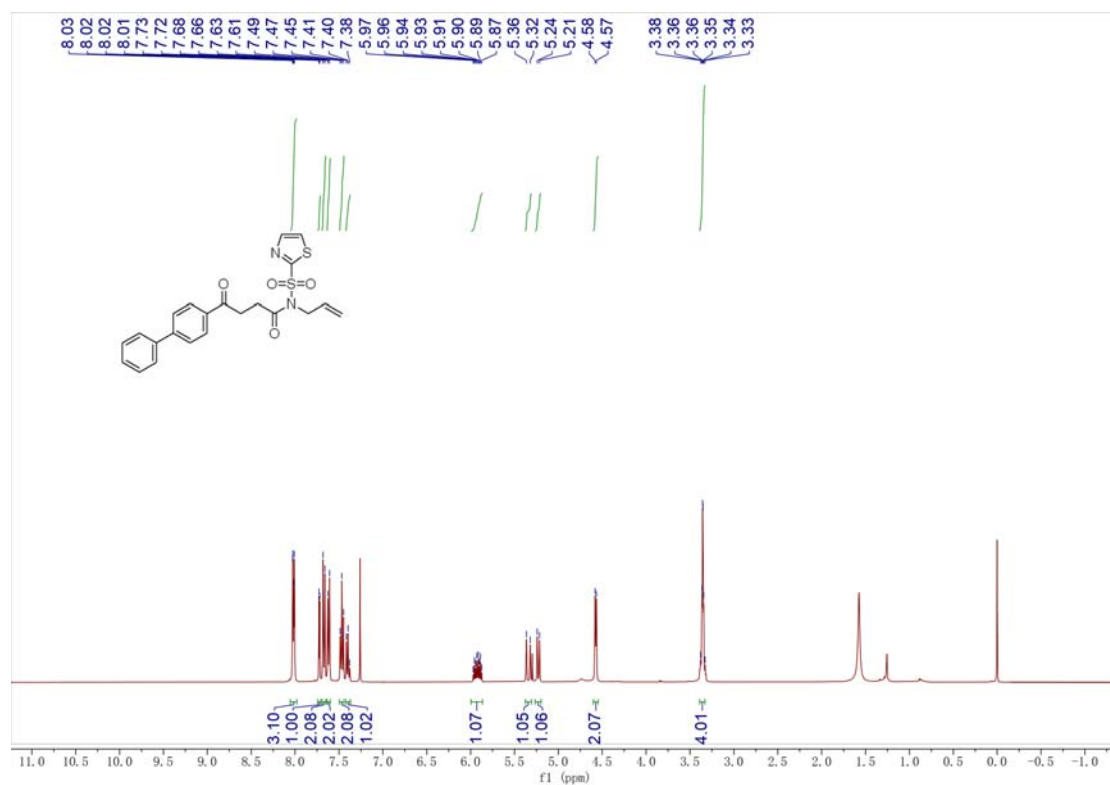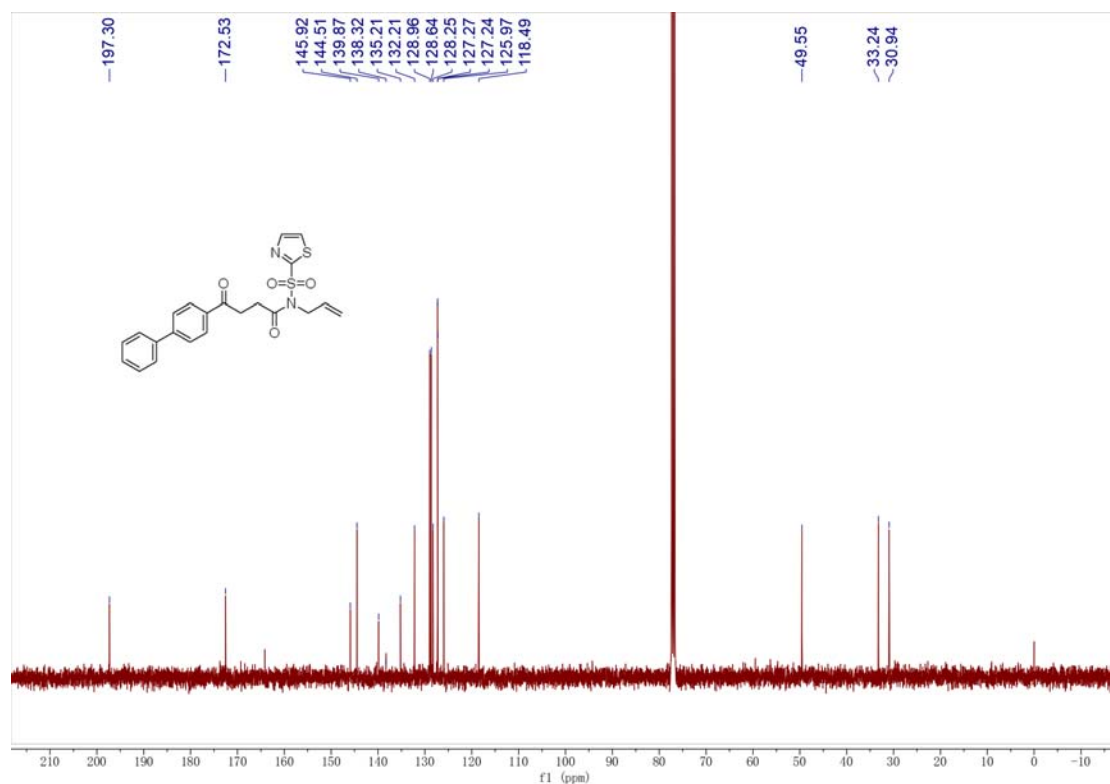



**(R)-N-allyl-4-((5S,8R,9S,10S,13R,14S,17R)-10,13-dimethyl-3,7,12-trioxohexadecahydro-1H-cyclopenta[a]phenanthren-17-yl)-N-(thiazol-2-ylsulfonyl)pentanamide (1z6)**

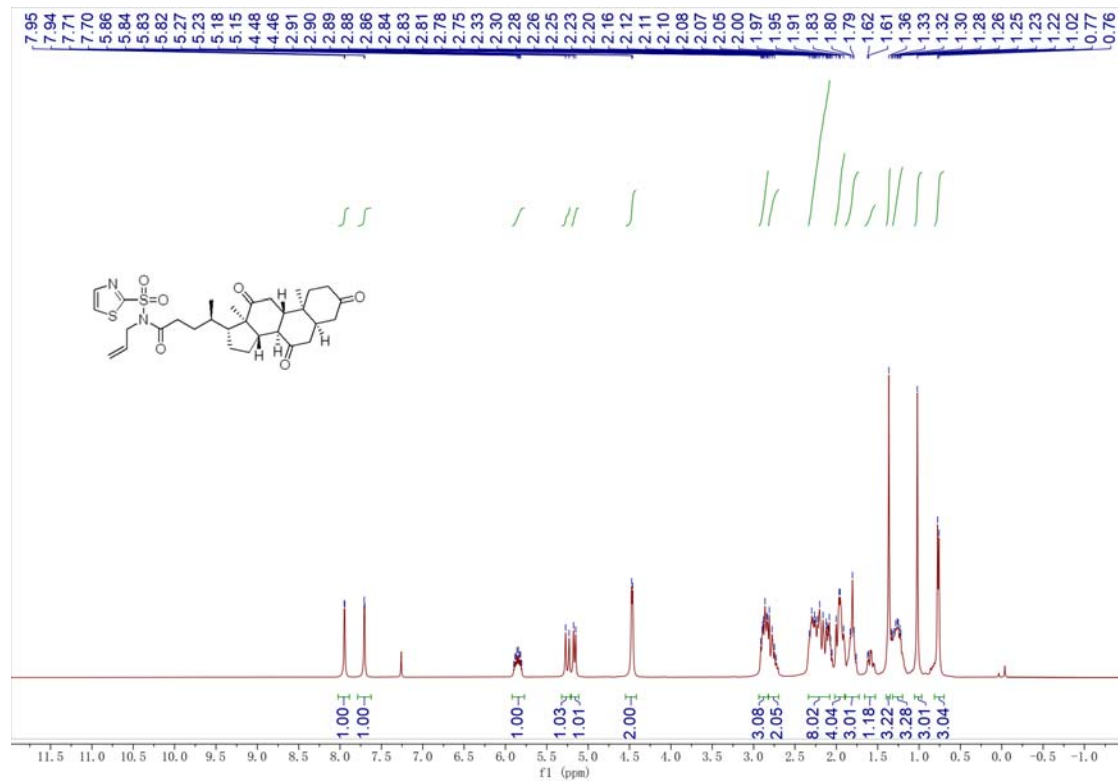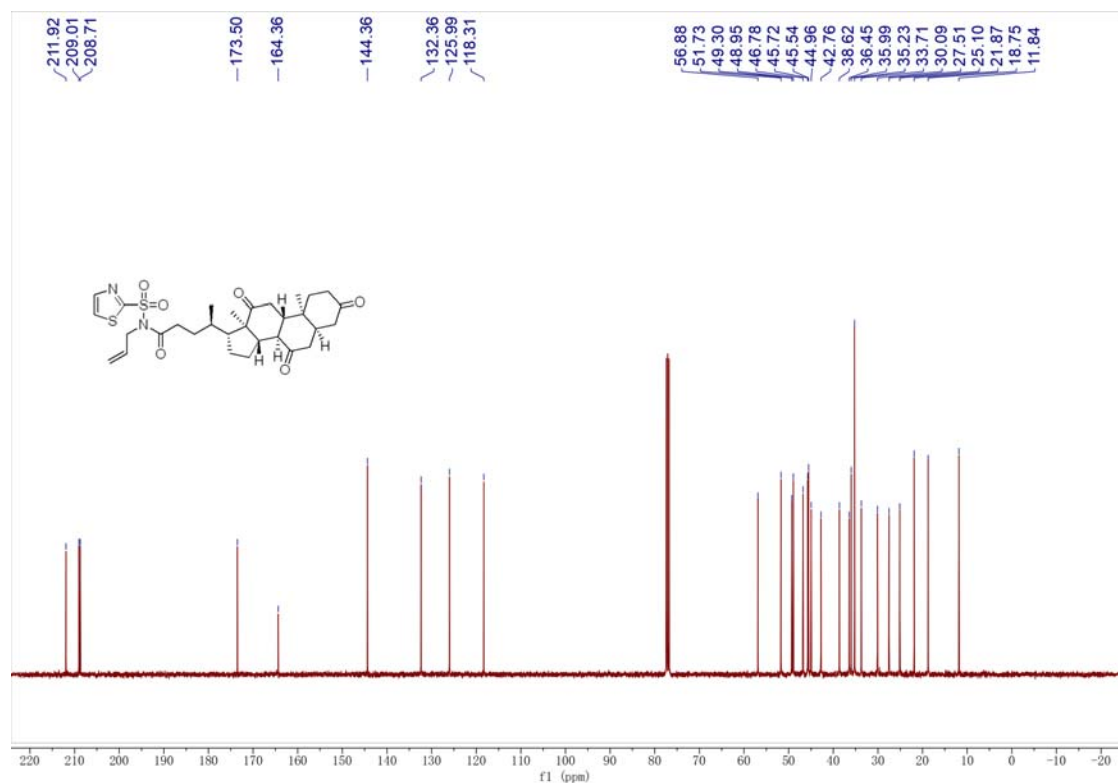

***N*-2-(benzo[d]thiazol-2-yl)-4,4,4-trifluorobutyl)acetamide (3a)**

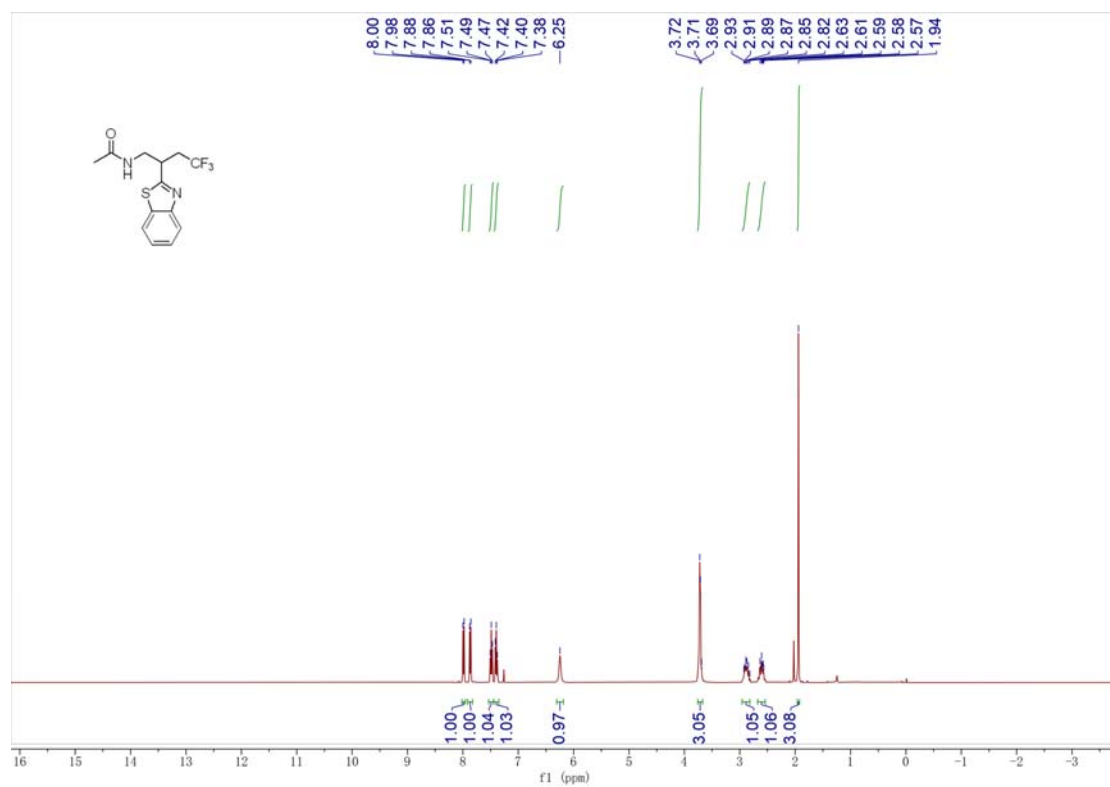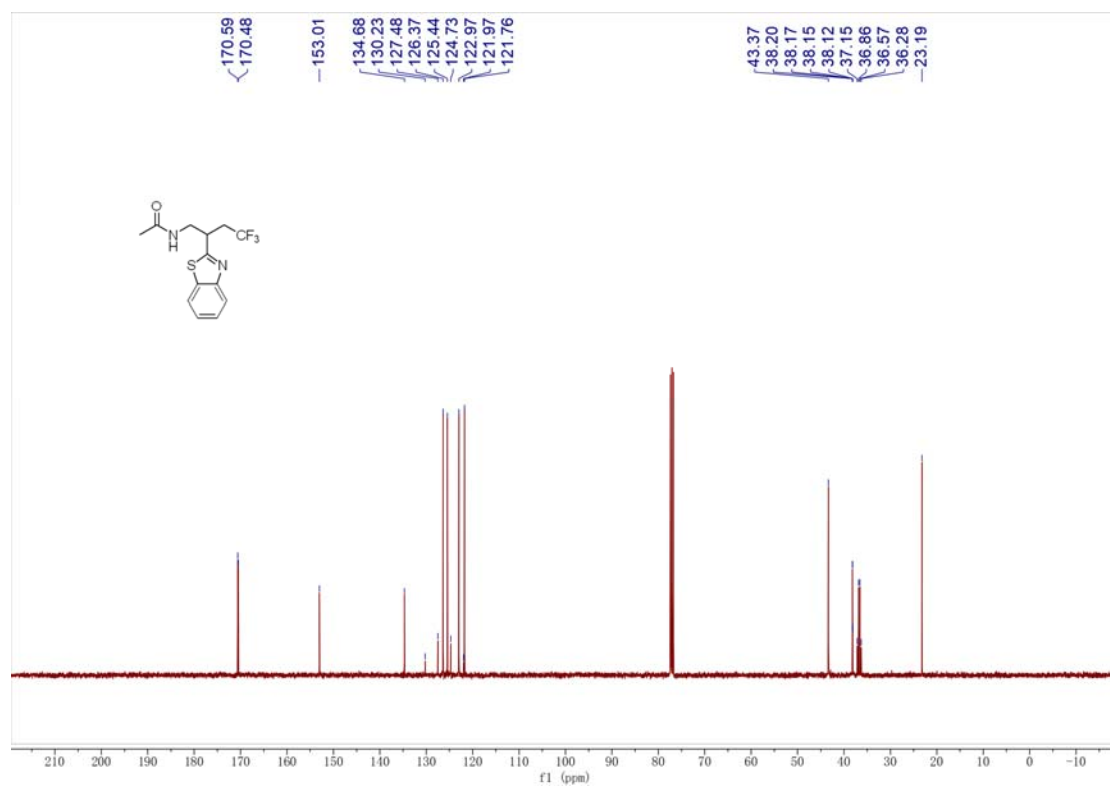

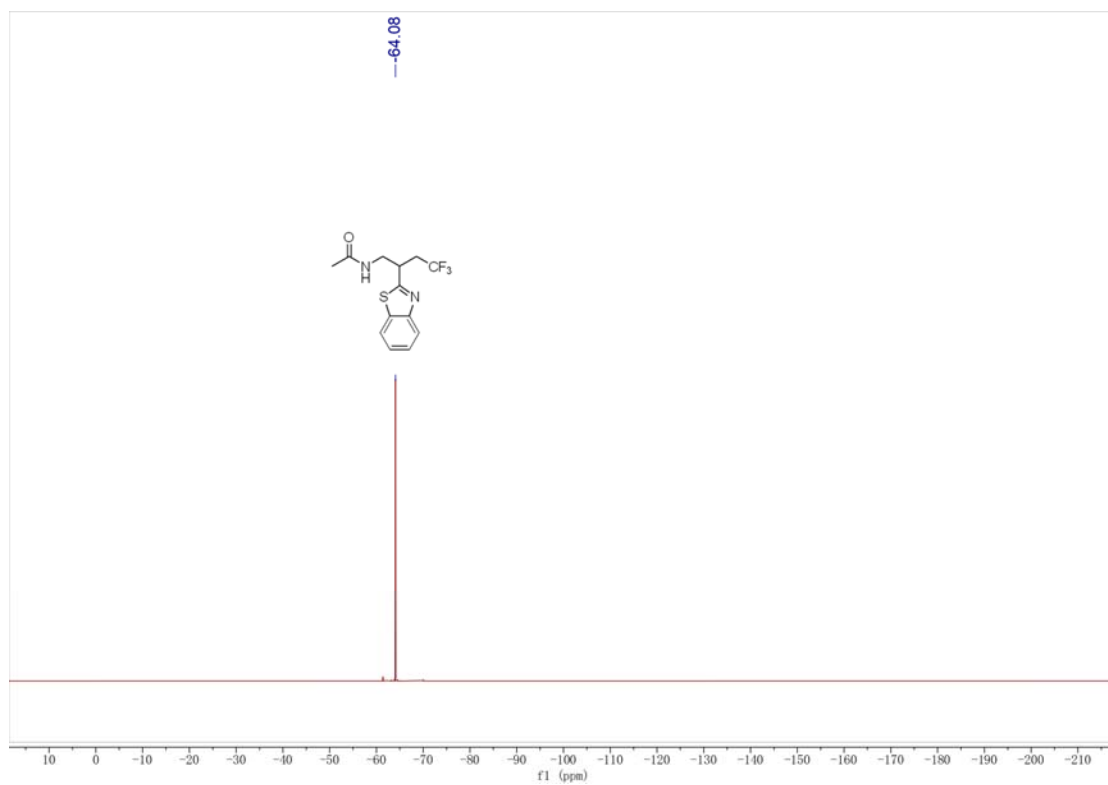

**tert-butyl (2-(benzo[d]thiazol-2-yl)-4,4,4-trifluorobutyl)carbamate (3b)**

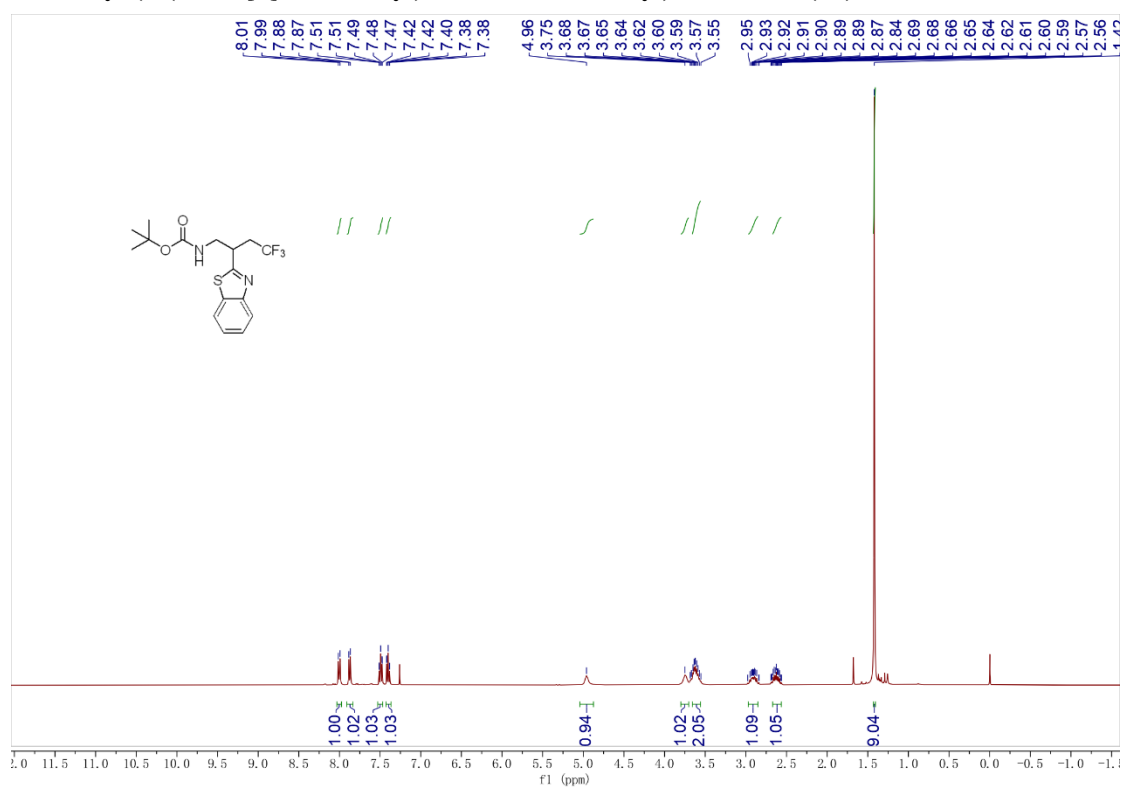

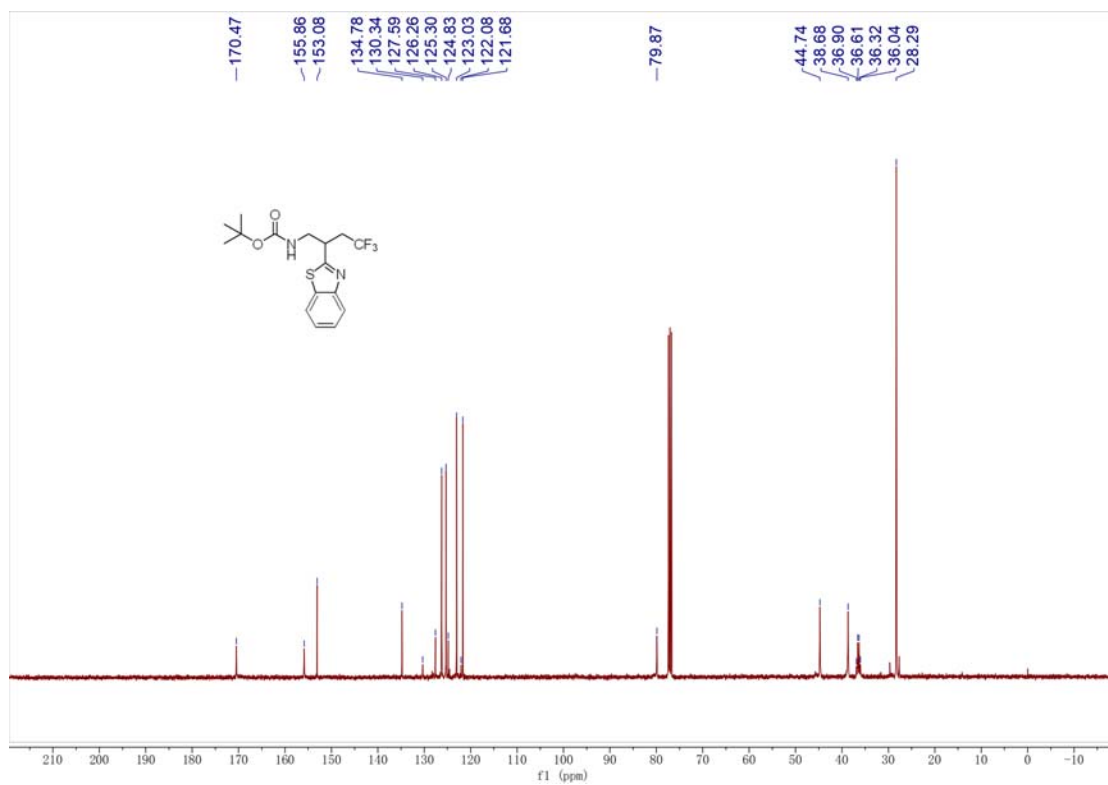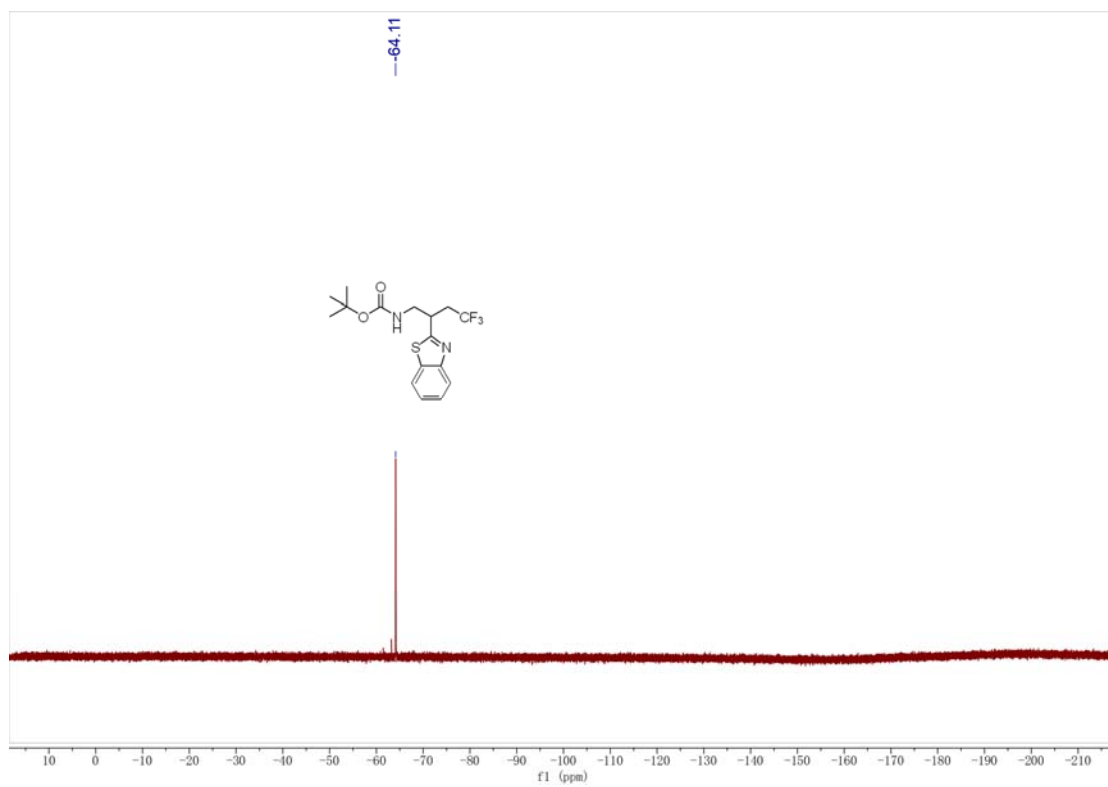

***N*-2-(benzo[d]thiazol-2-yl)-4,4,4-trifluorobutyl)pivalamide (3c)**

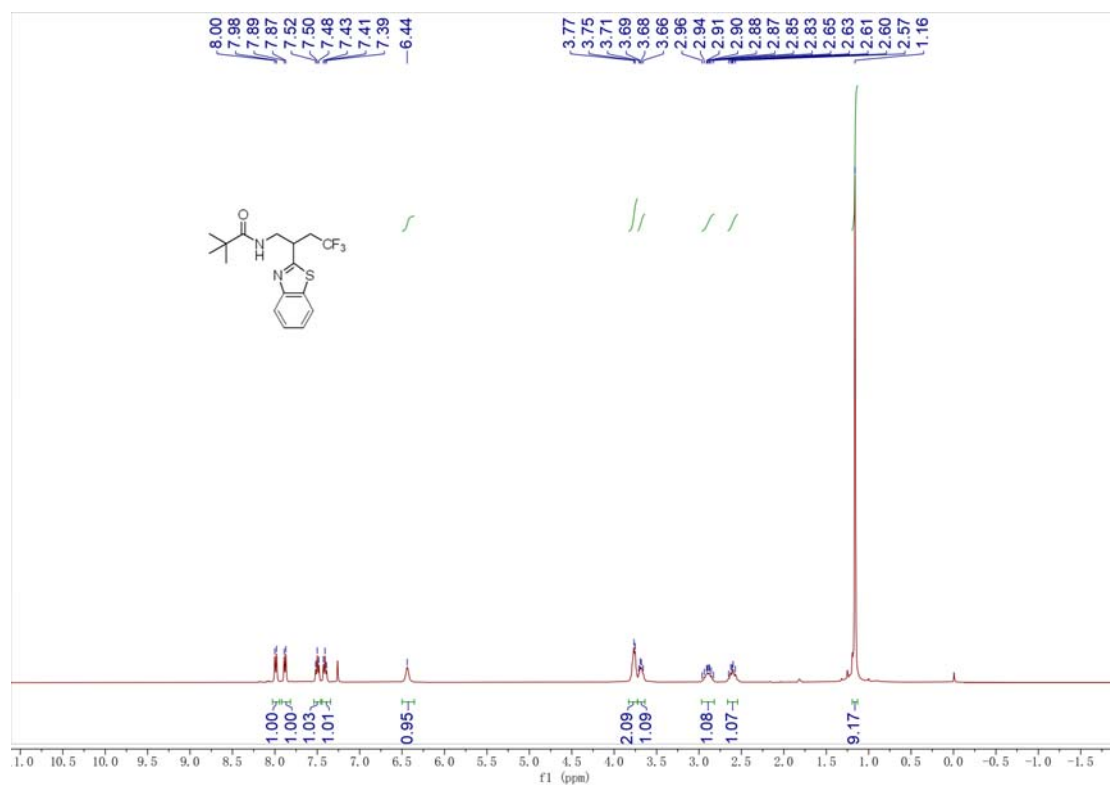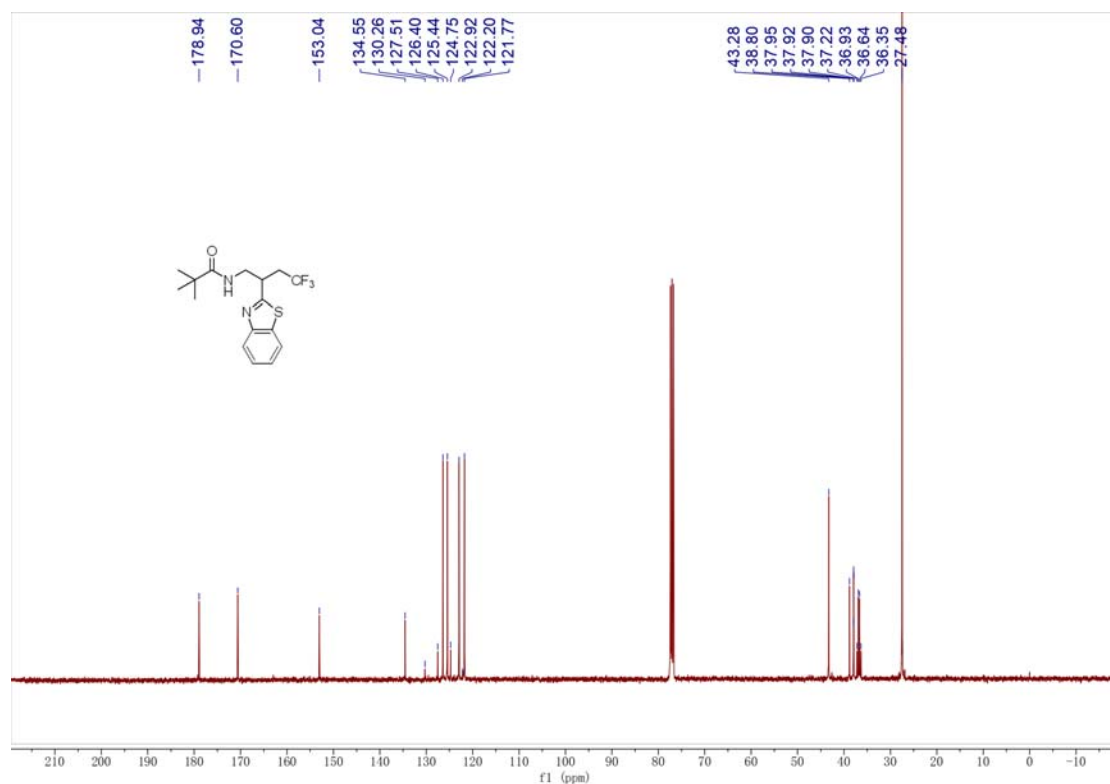

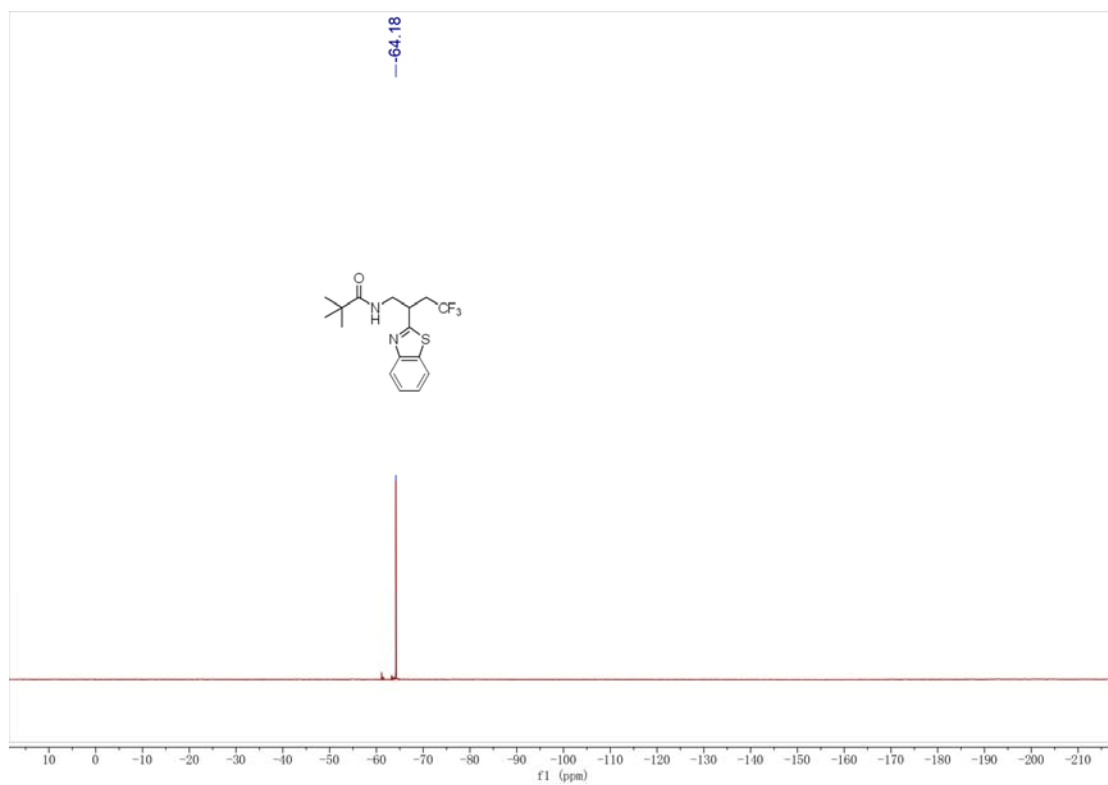

***N*-2-(benzo[d]thiazol-2-yl)-4,4,4-trifluorobutylbenzamide (3d)**

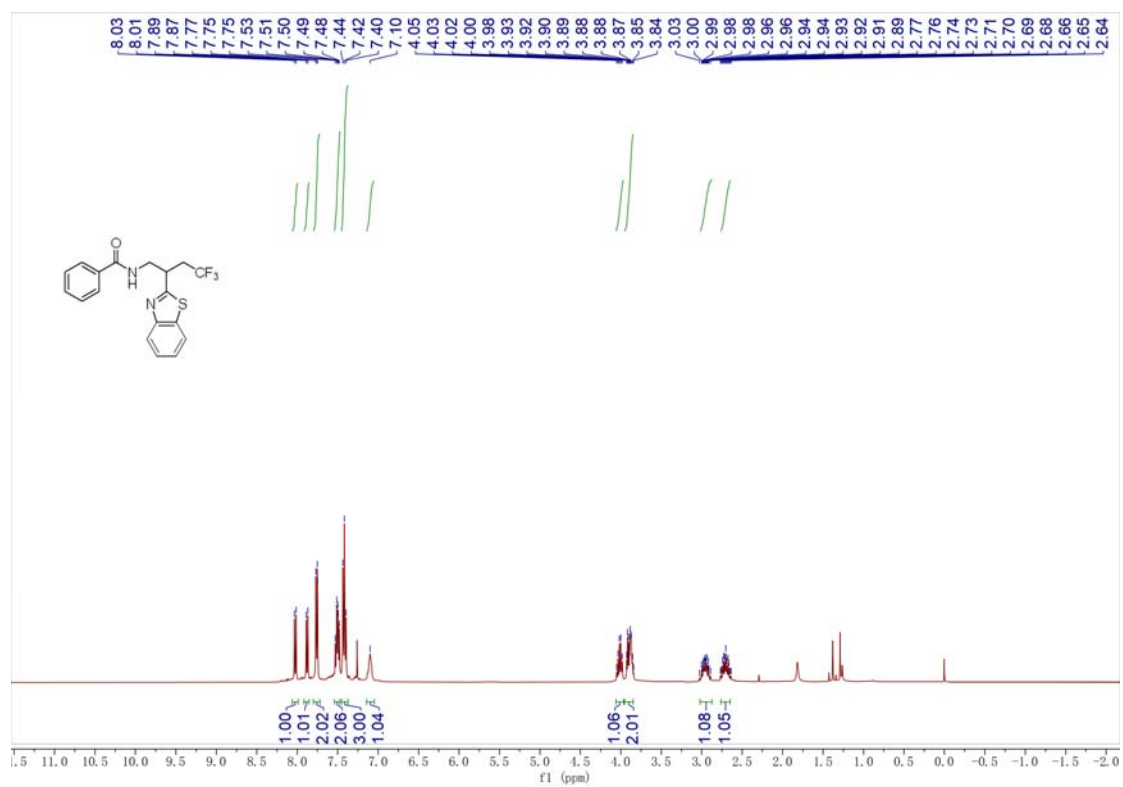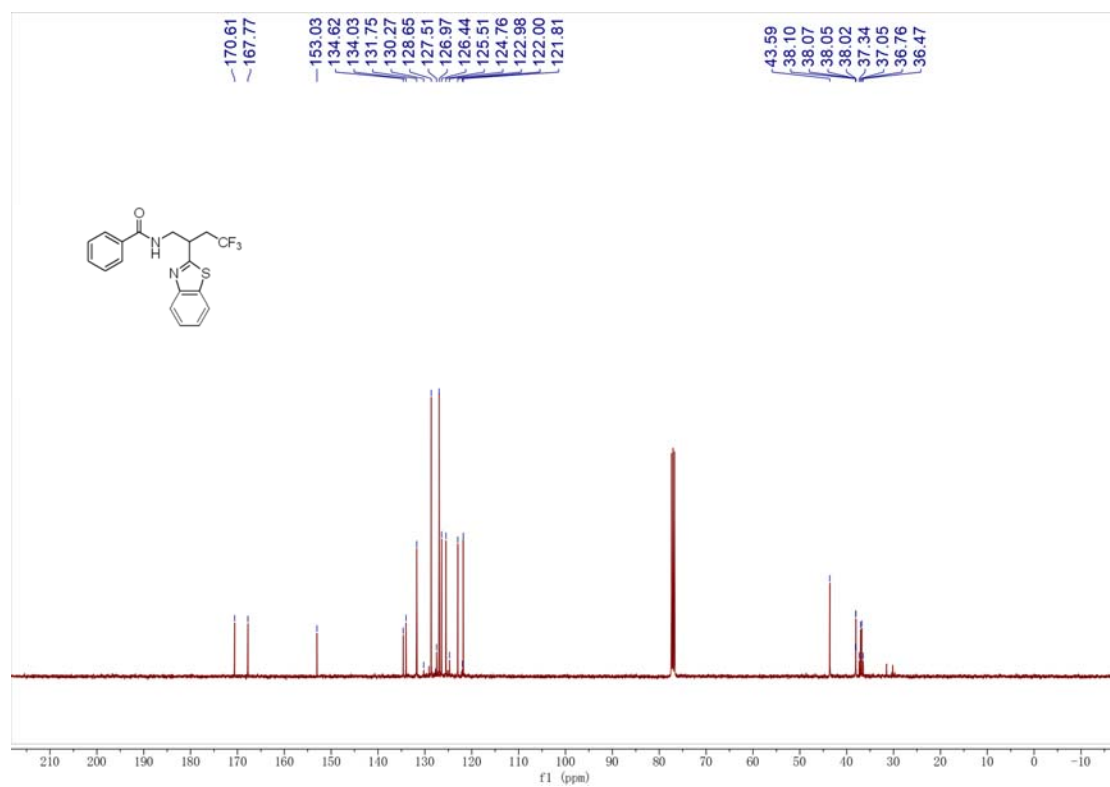

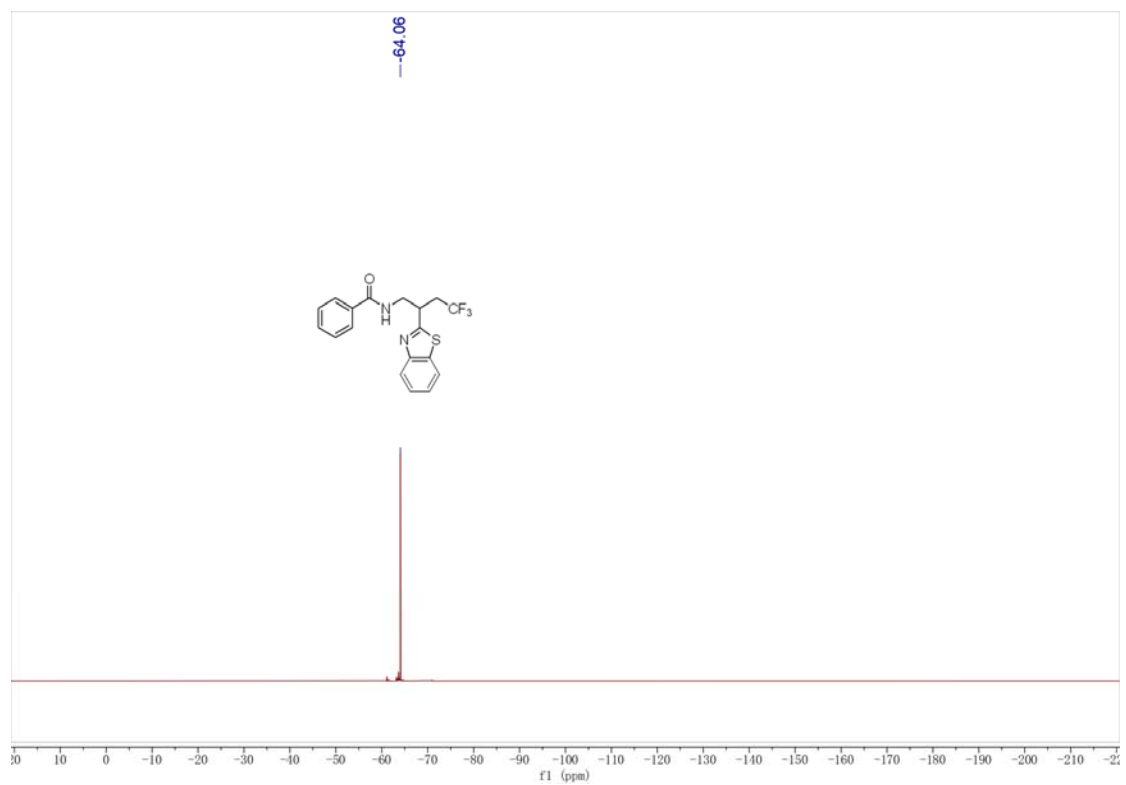



2-(benzo[d]thiazol-2-ylsulfonyl)-4-(2,2,2-trifluoroethyl)-3,4-dihydroisoquinolin-1(2H)-one  
(3d')

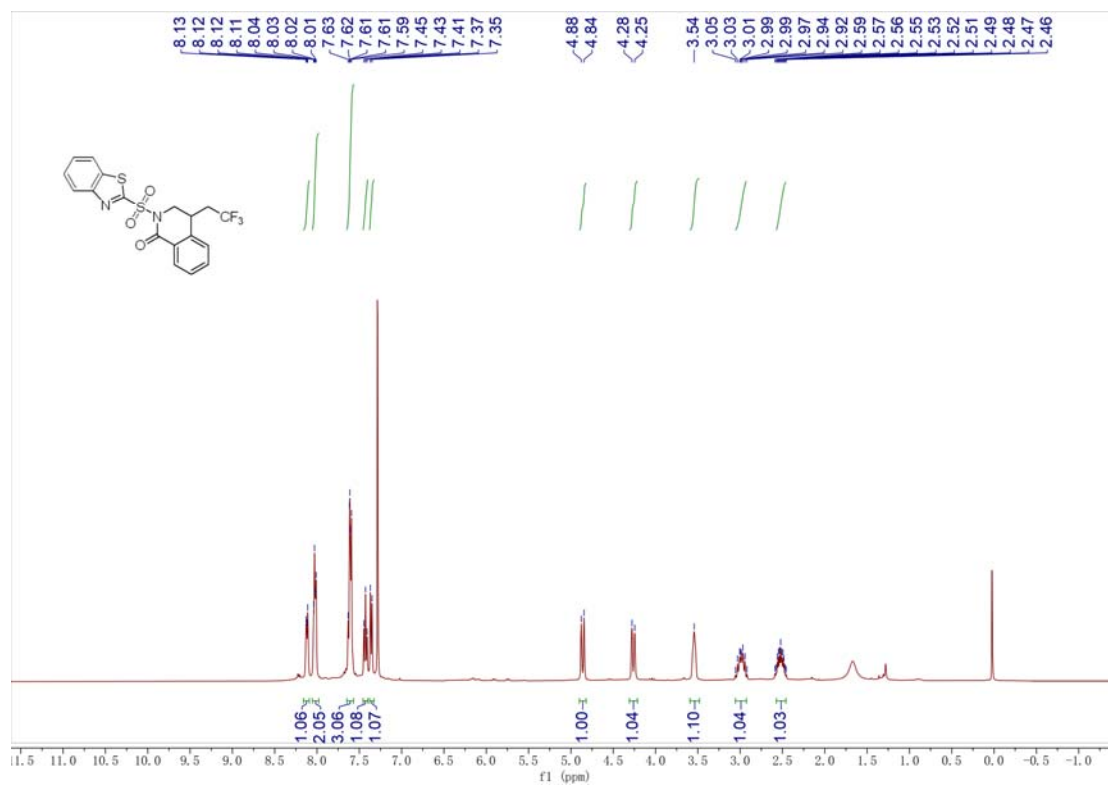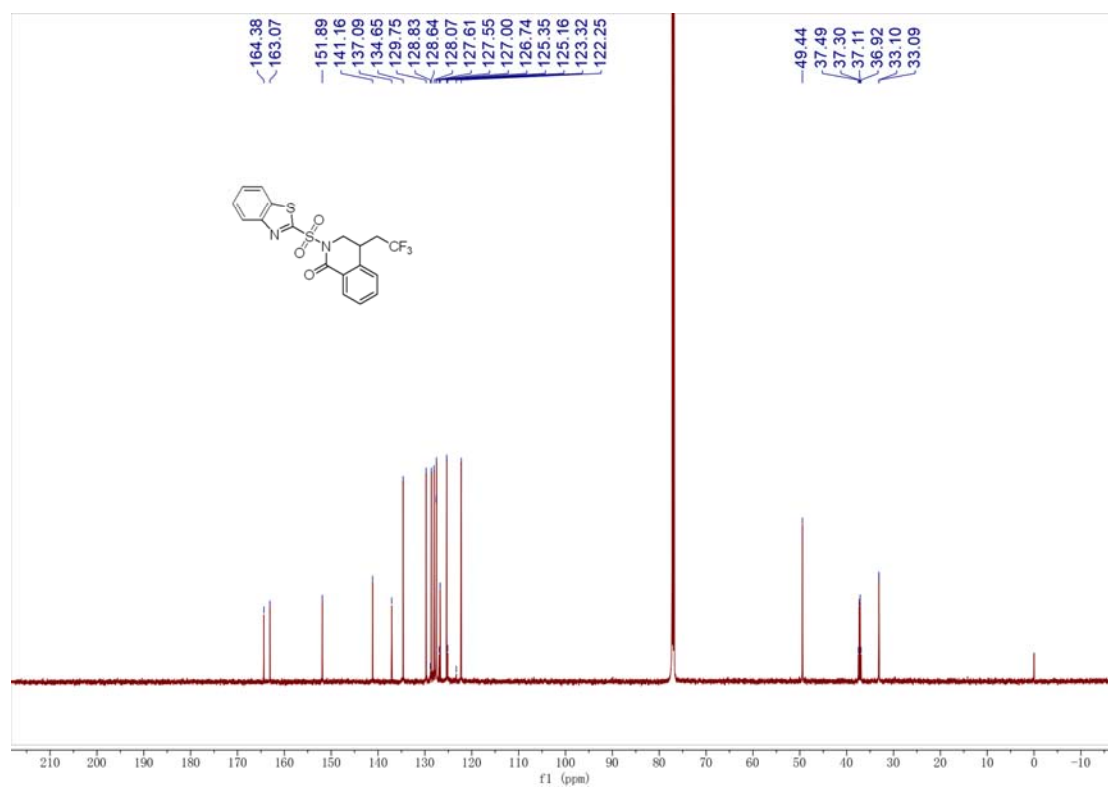

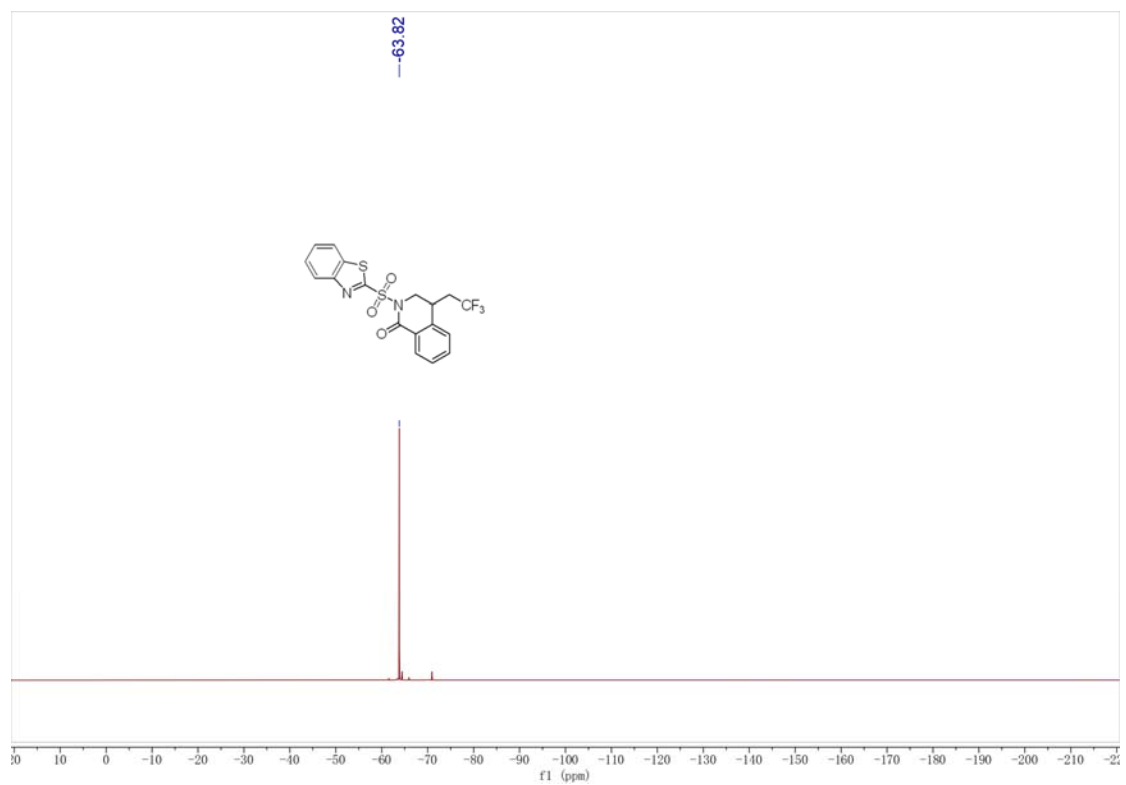

***N*-(2-(benzo[d]thiazol-2-yl)-4,4,4-trifluorobutyl)pyrimidin-2-amine (3e)**

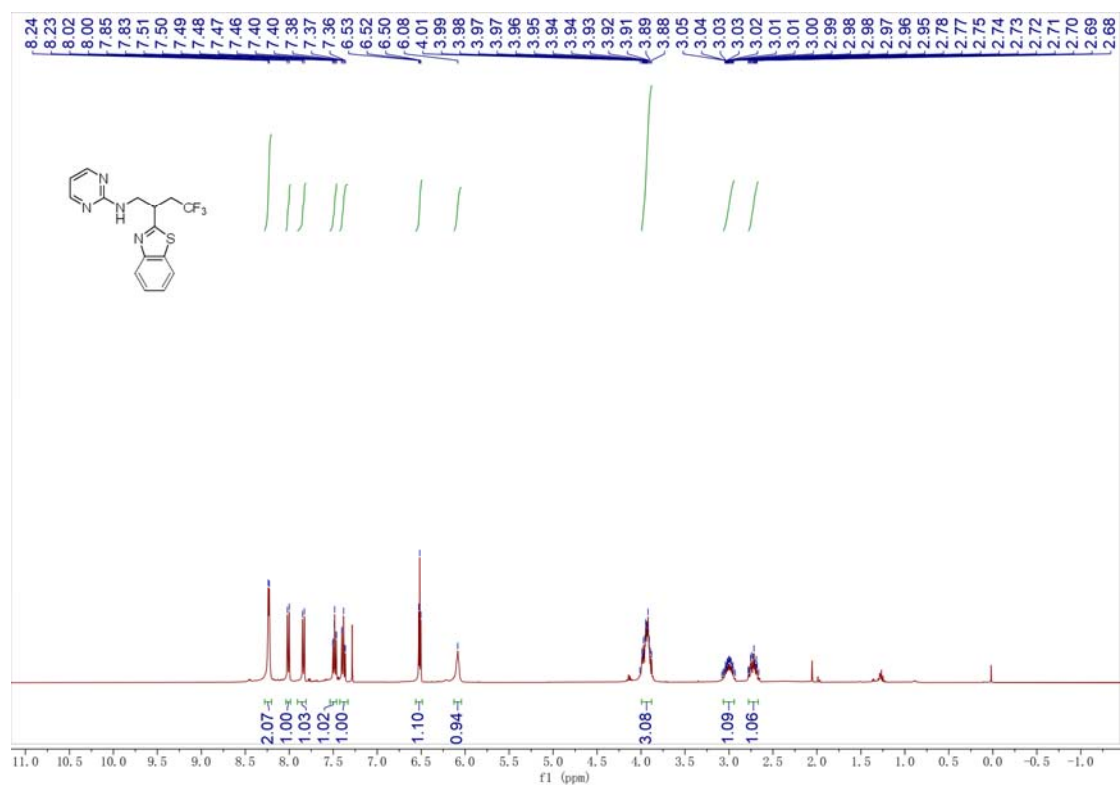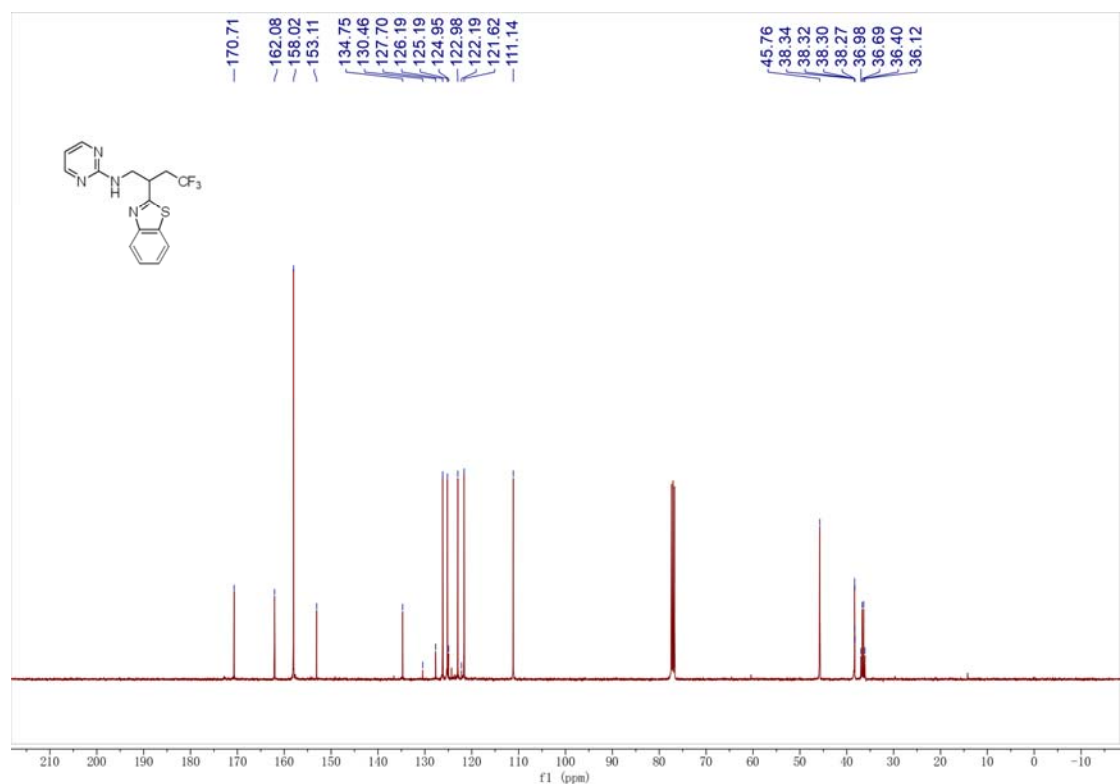

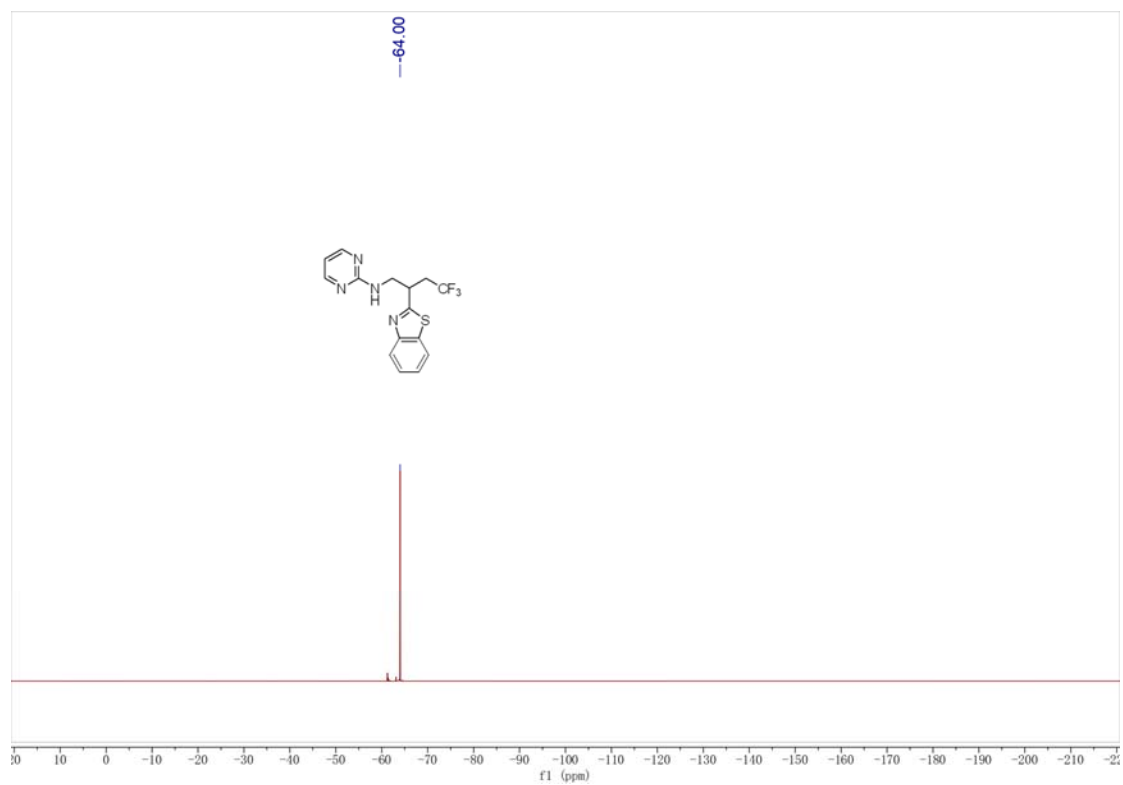

**N-(4,4,4-trifluoro-2-(thiazol-2-yl)butyl)acetamide (3f)**

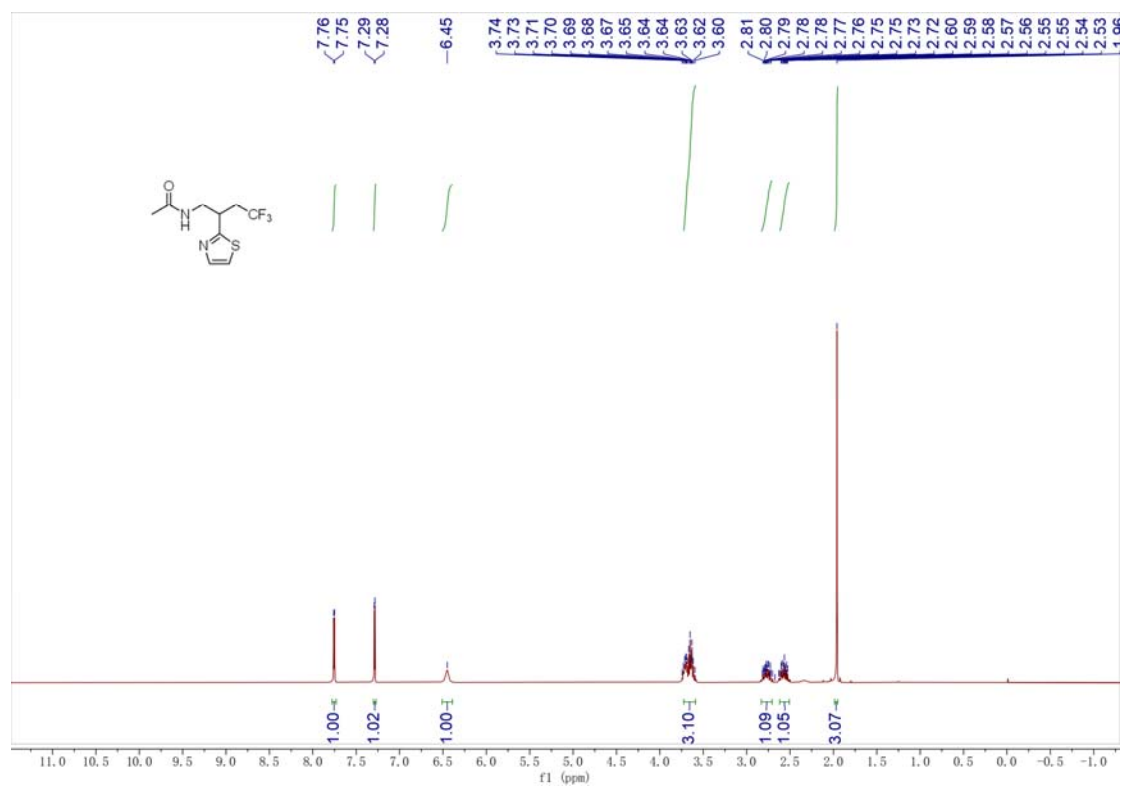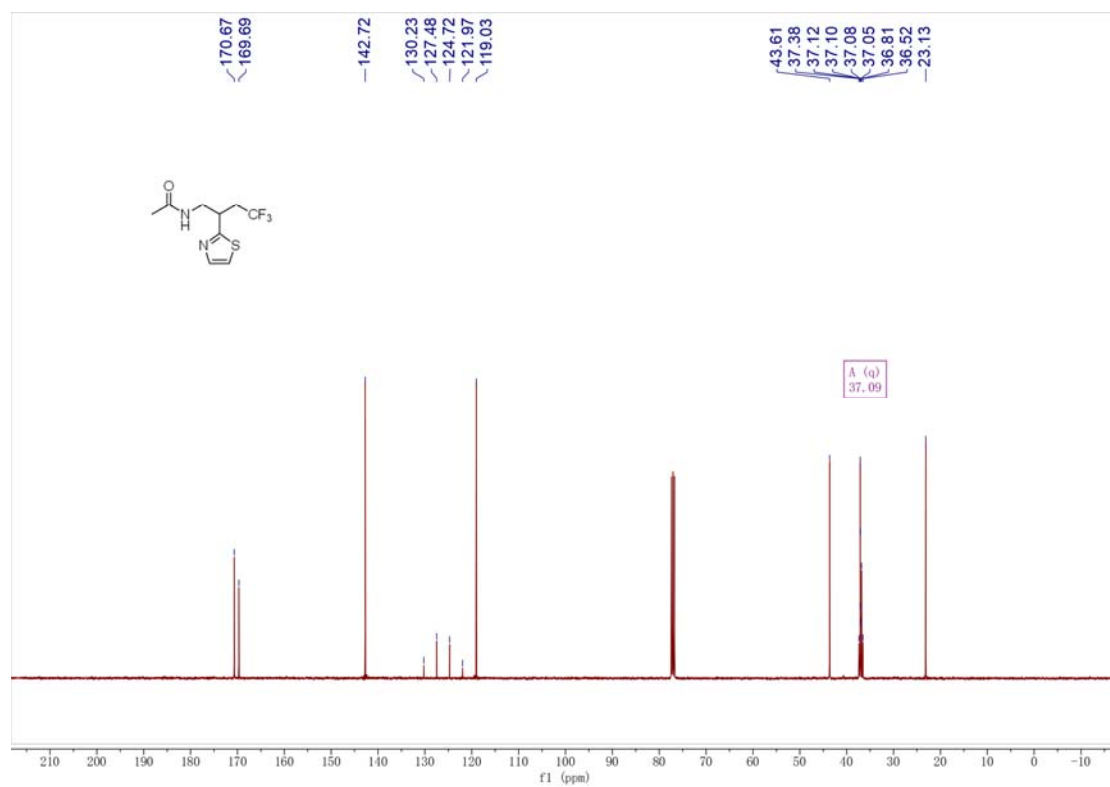

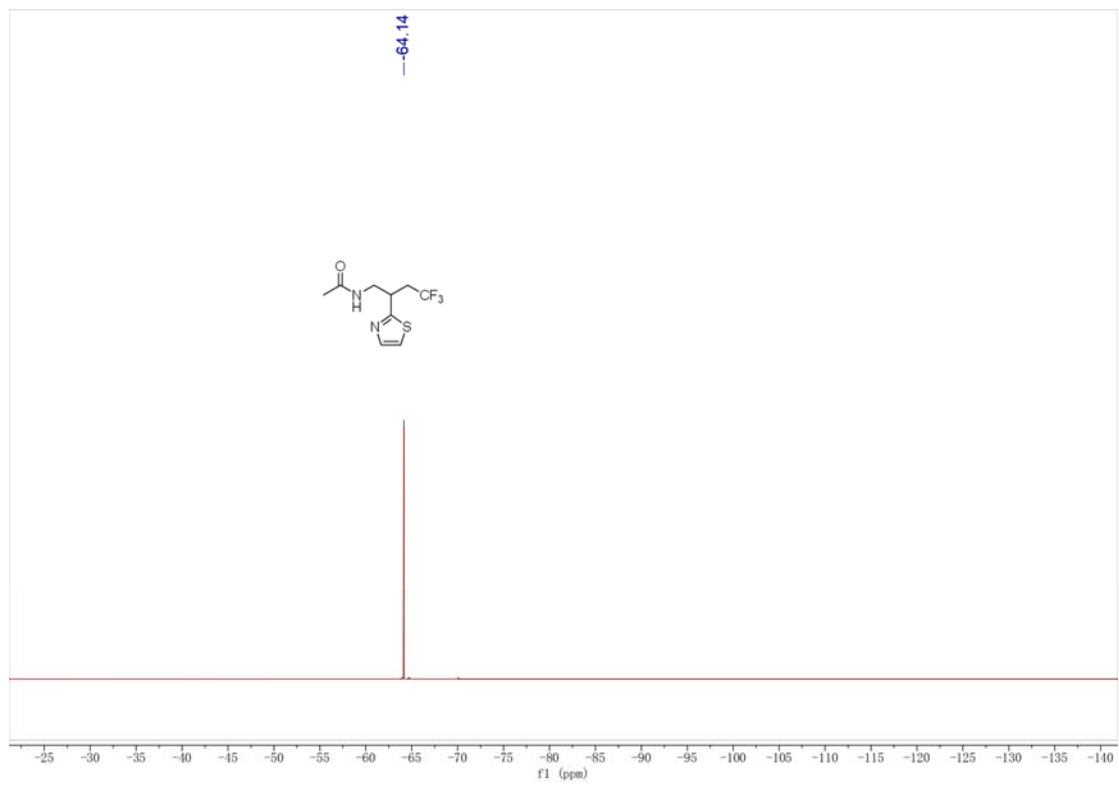

***N*-2-(5-chlorothiophen-2-yl)-4,4,4-trifluorobutylacetamide (3g)**

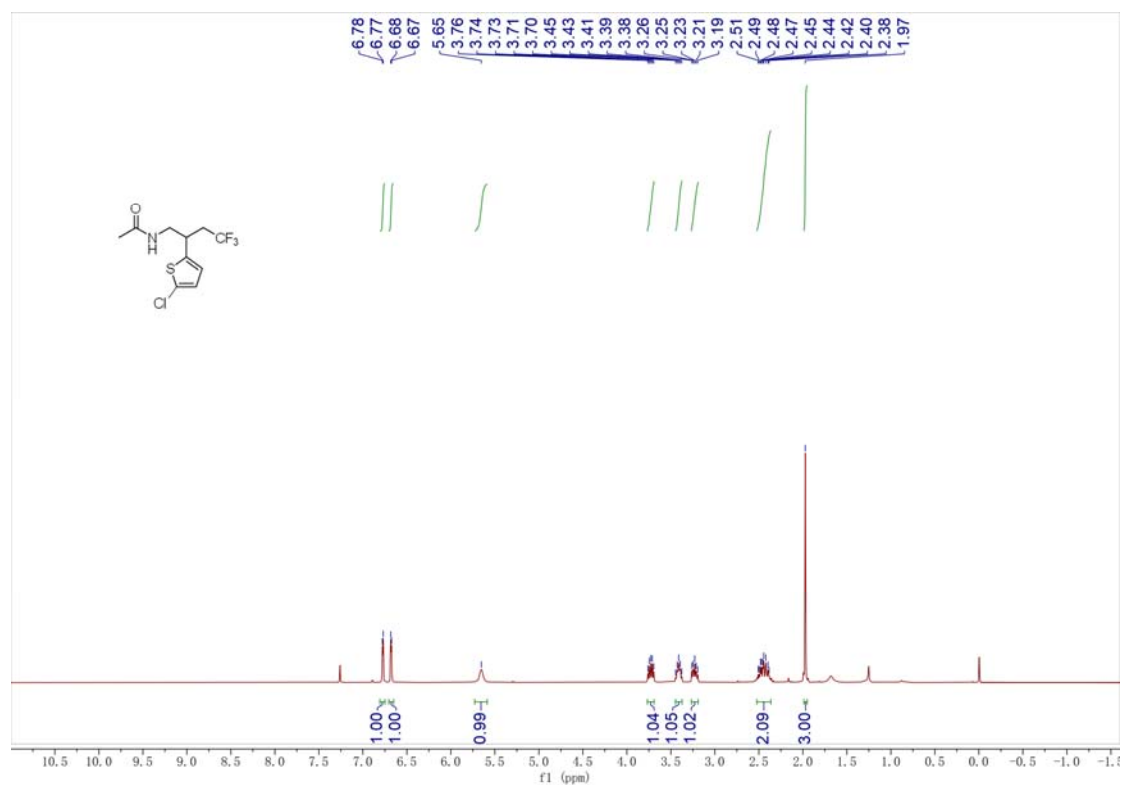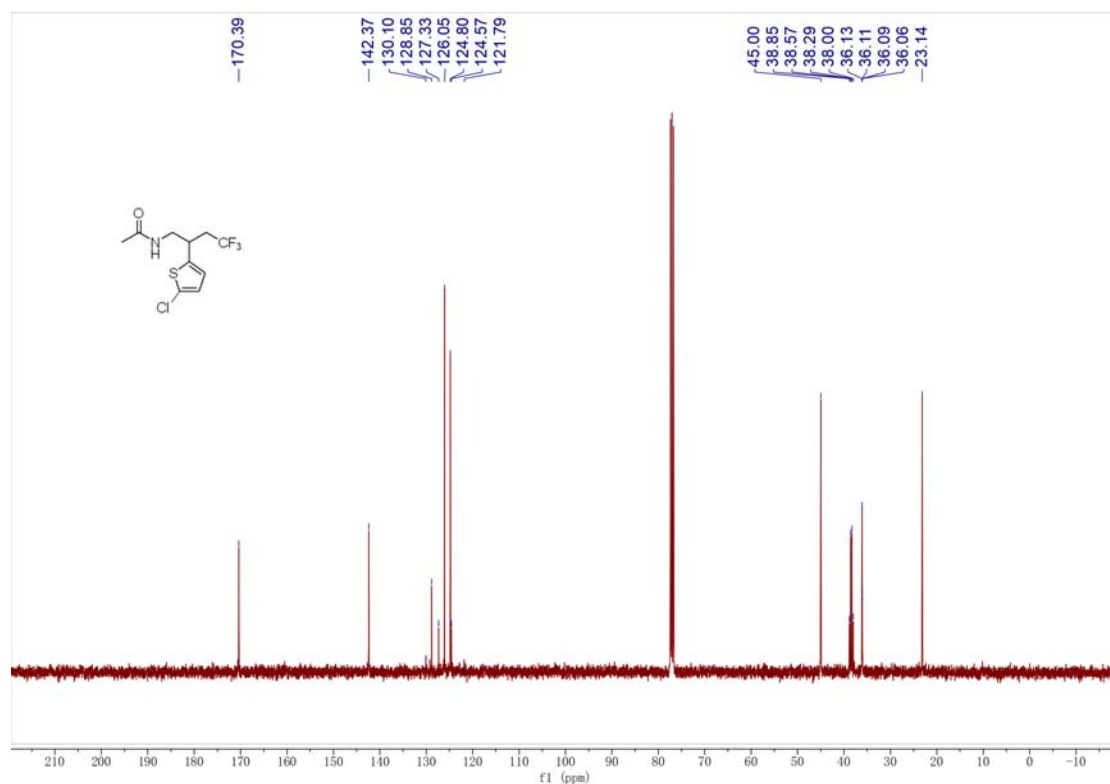

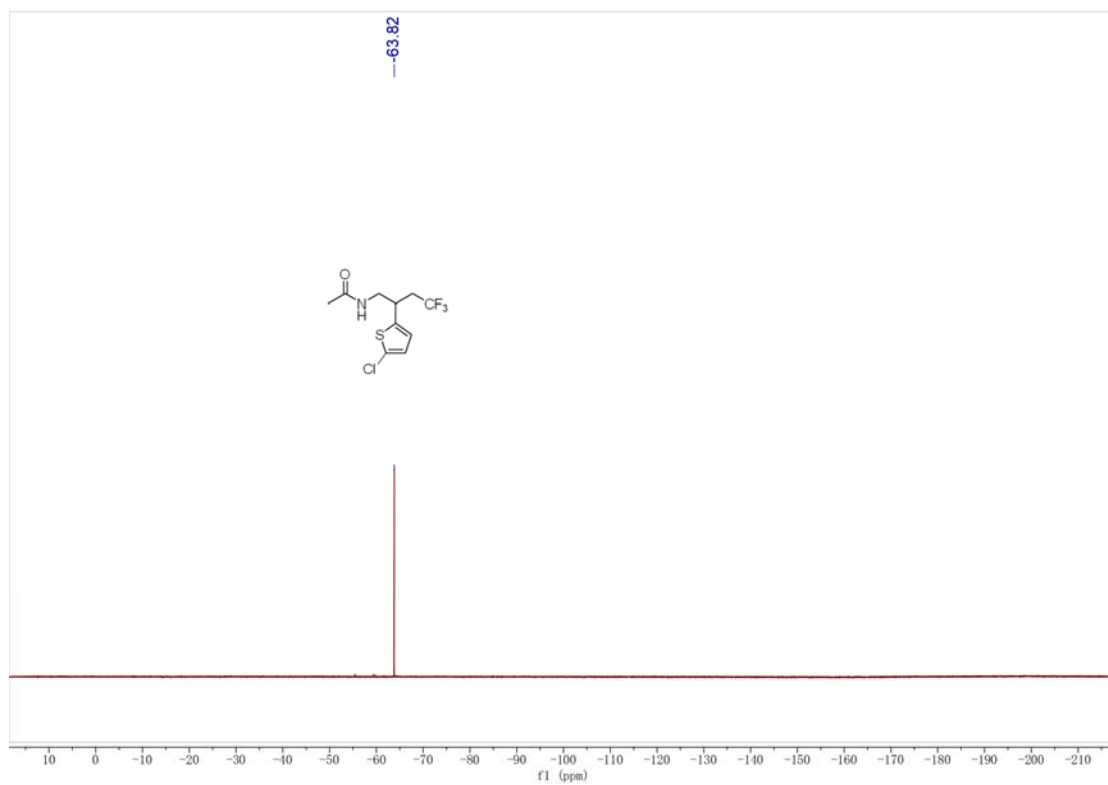



***N*-[2-(5-bromothiophen-2-yl)-4,4,4-trifluorobutyl]acetamide (3h)**

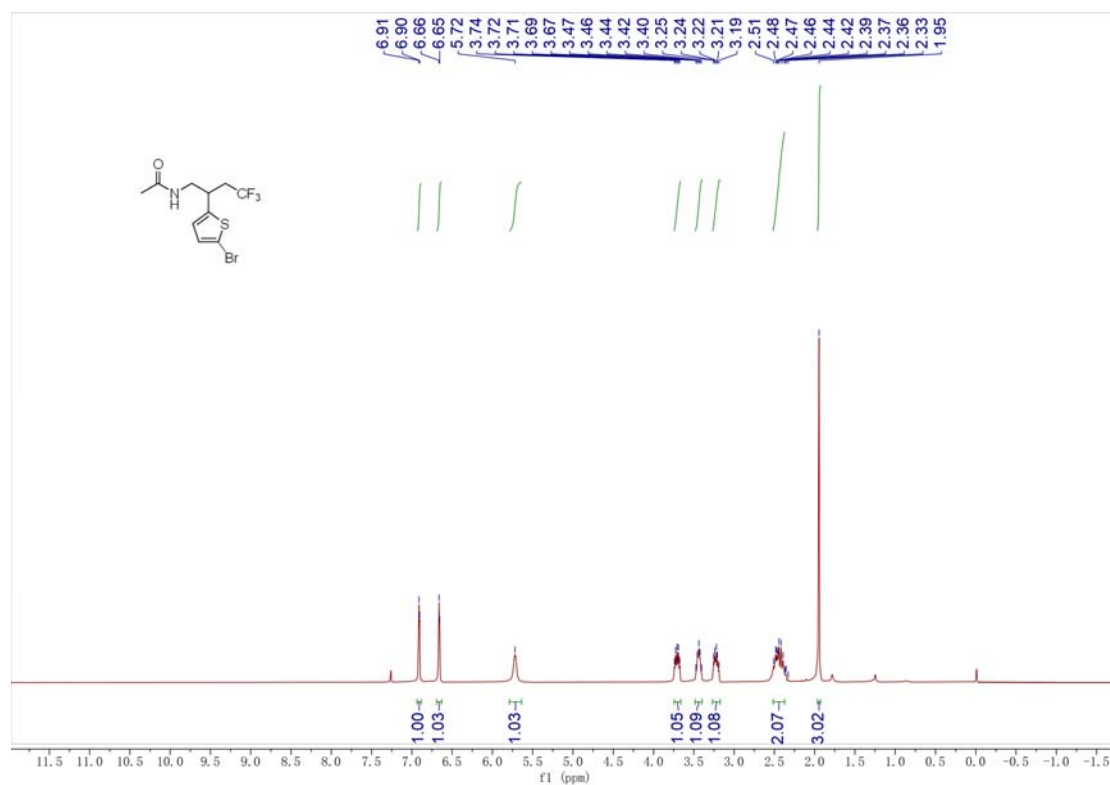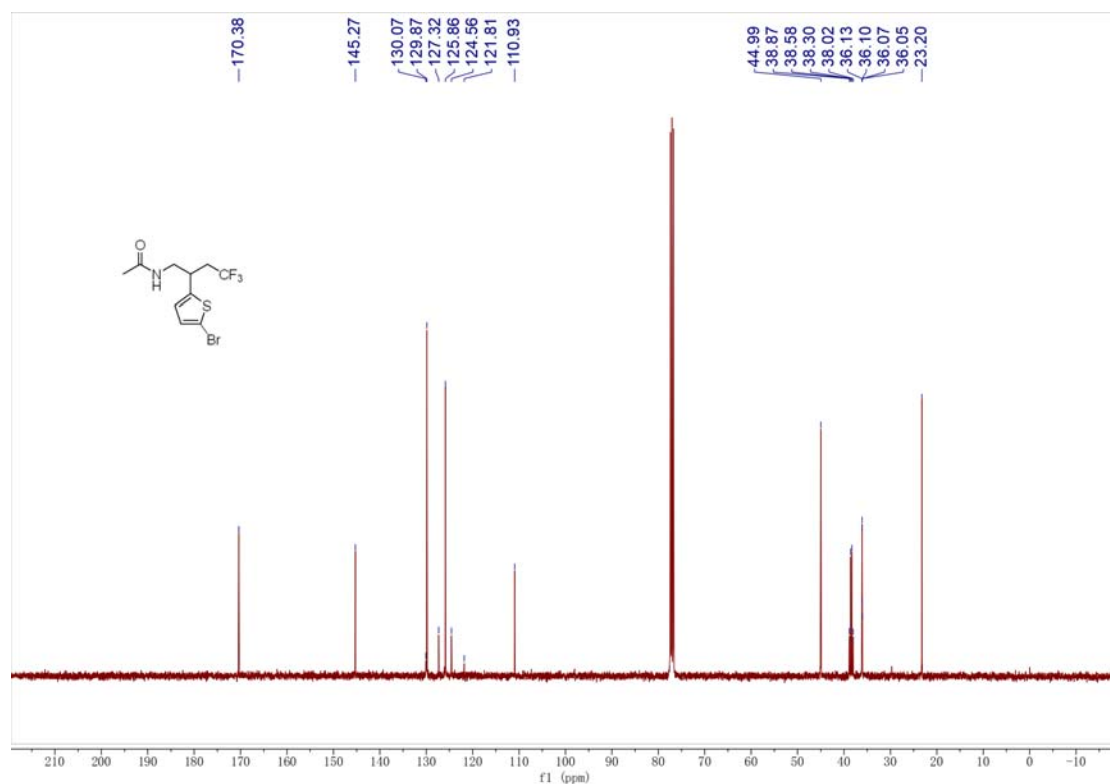

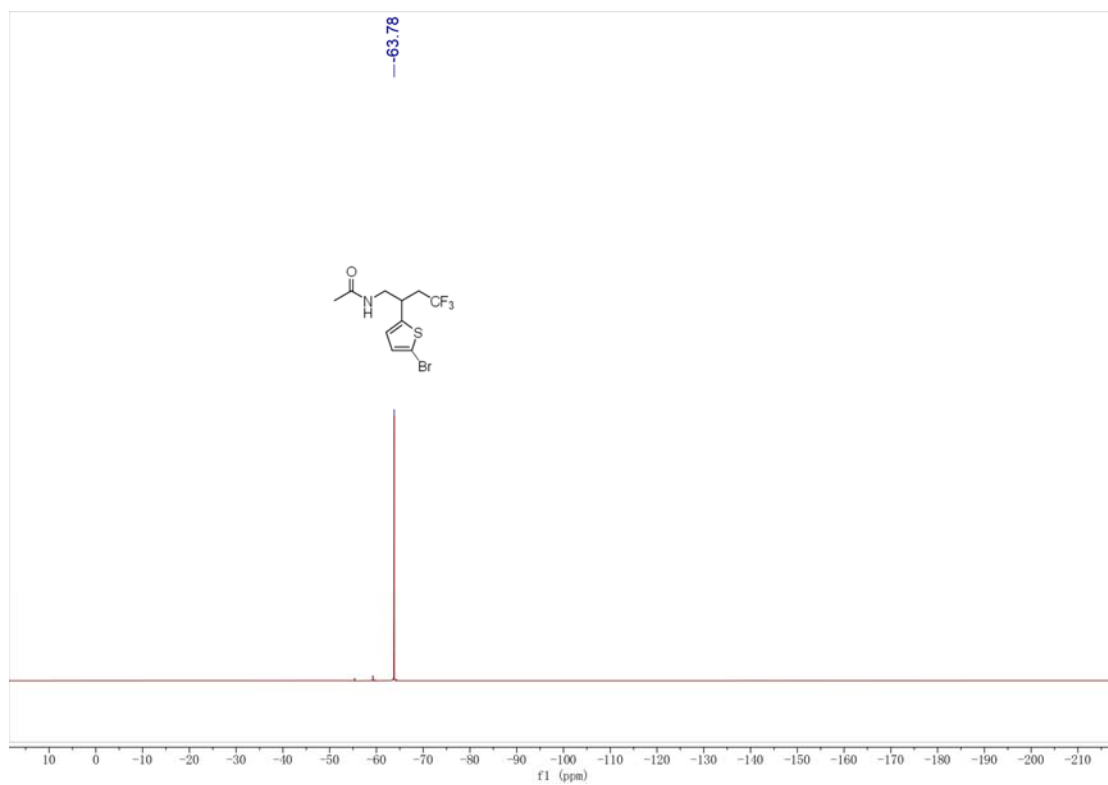

methyl 5-(1-acetamido-4,4,4-trifluorobutan-2-yl)thiophene-2-carboxylate (3i)

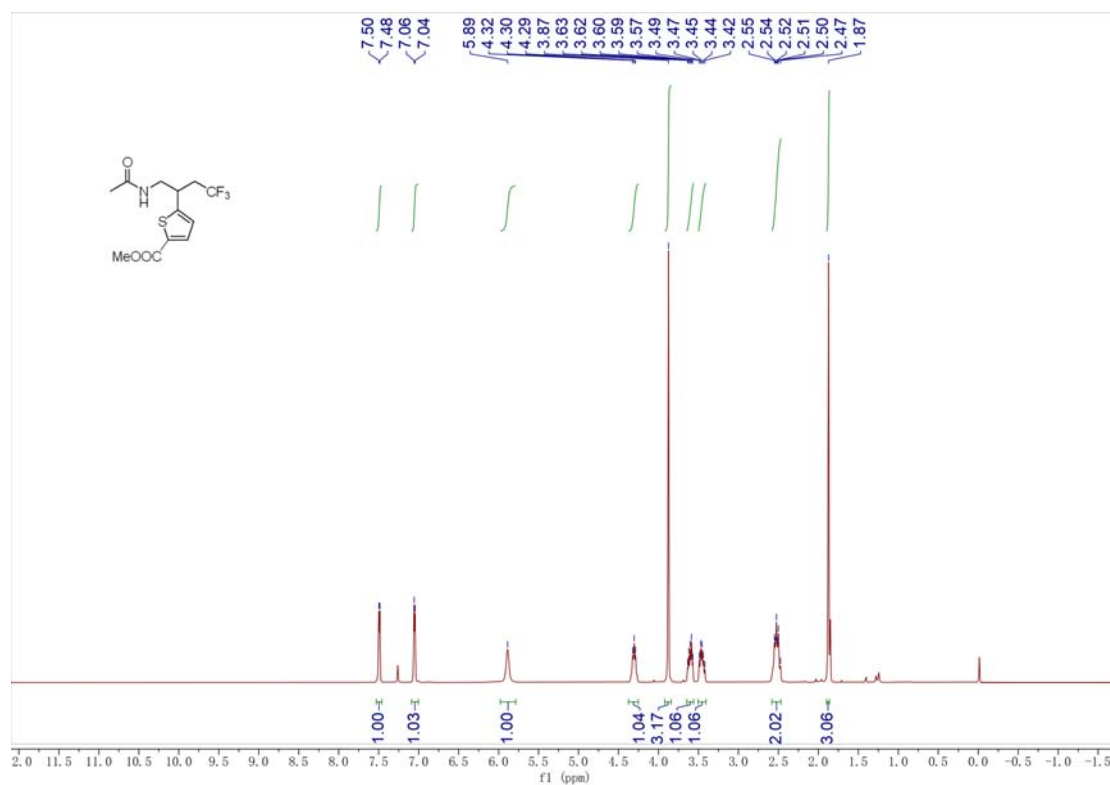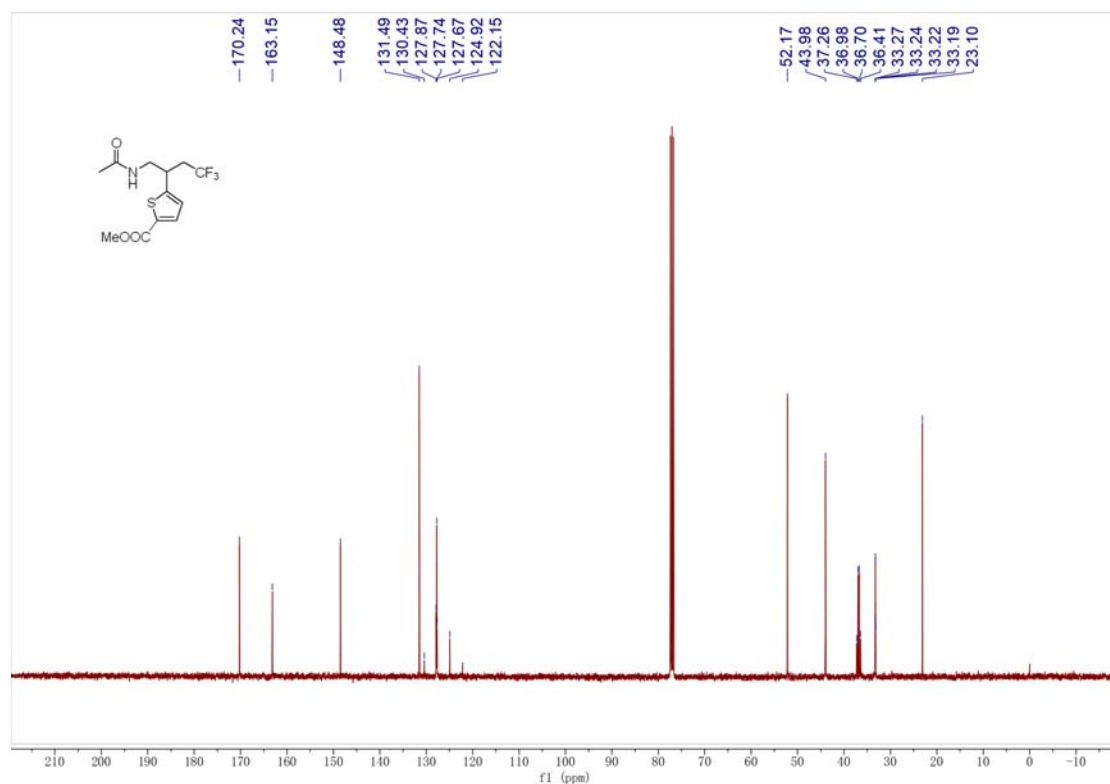

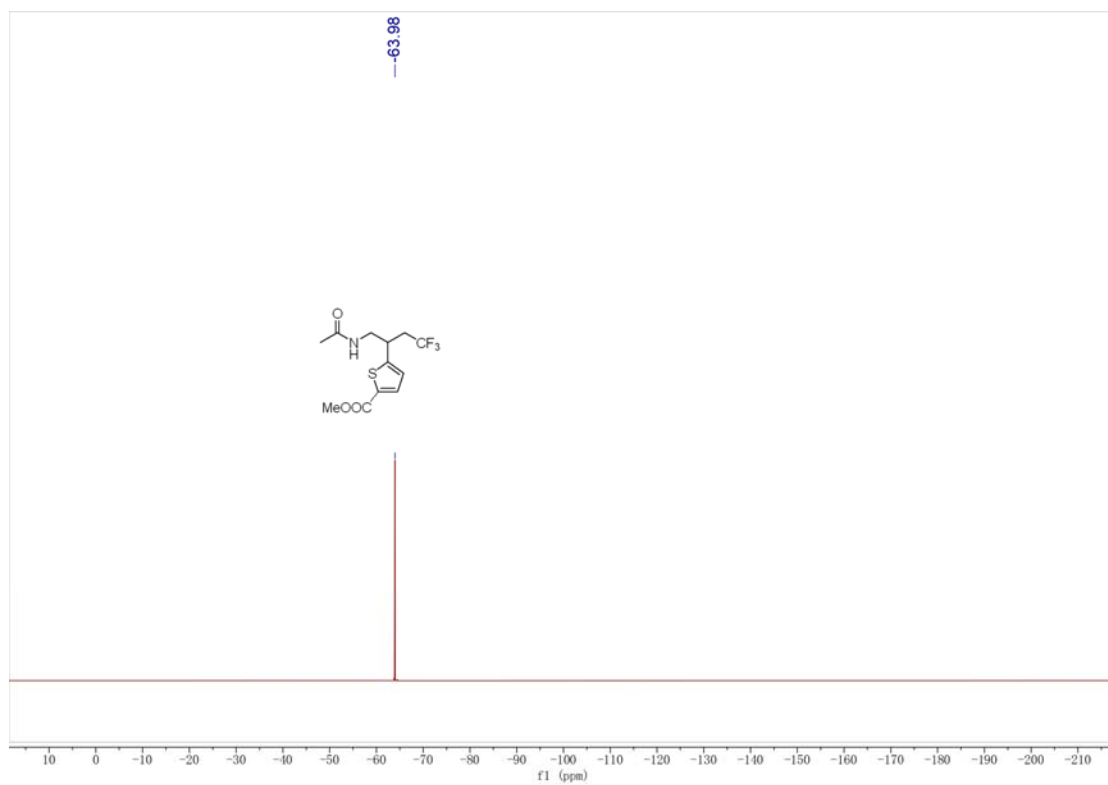

***N*-(2-(3-acetyl-5-chlorothiophen-2-yl)-4,4,4-trifluorobutyl)acetamide (3j)**

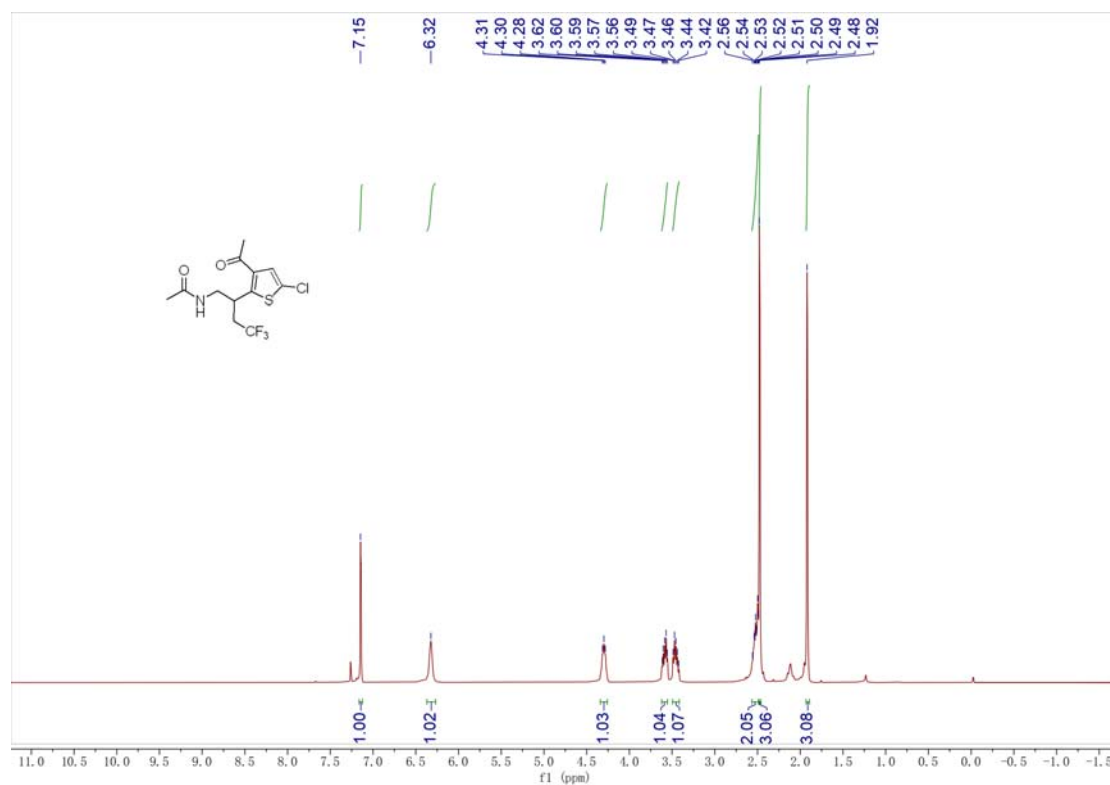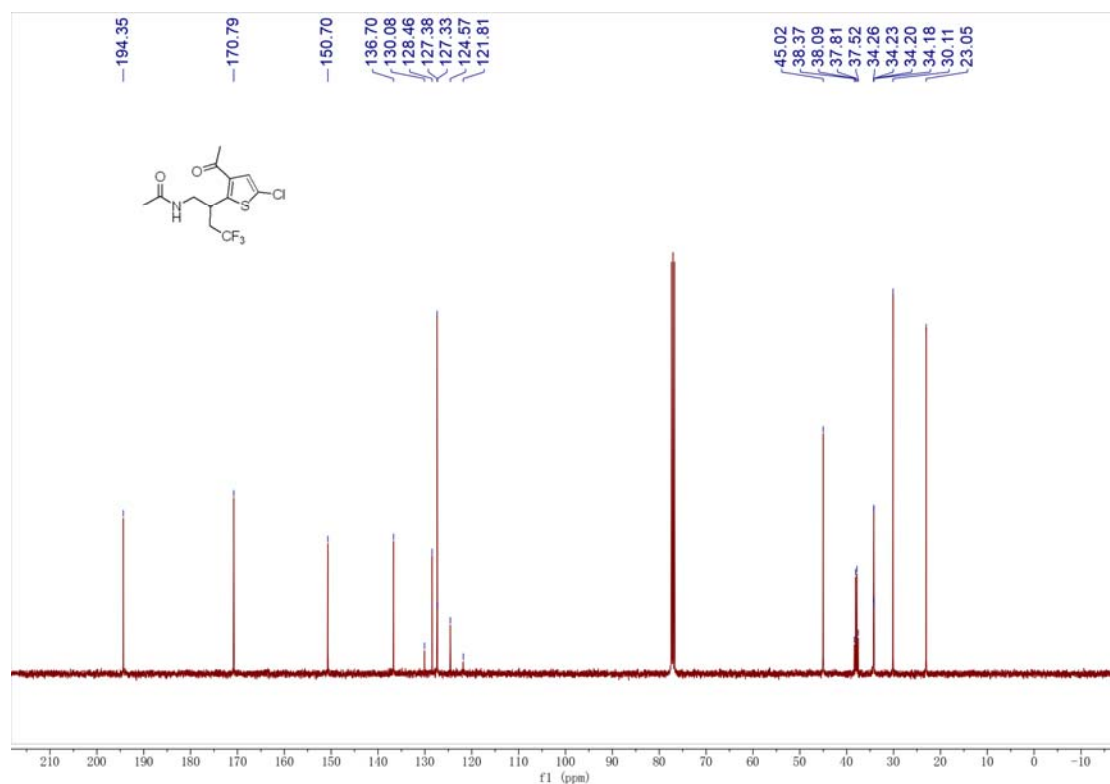

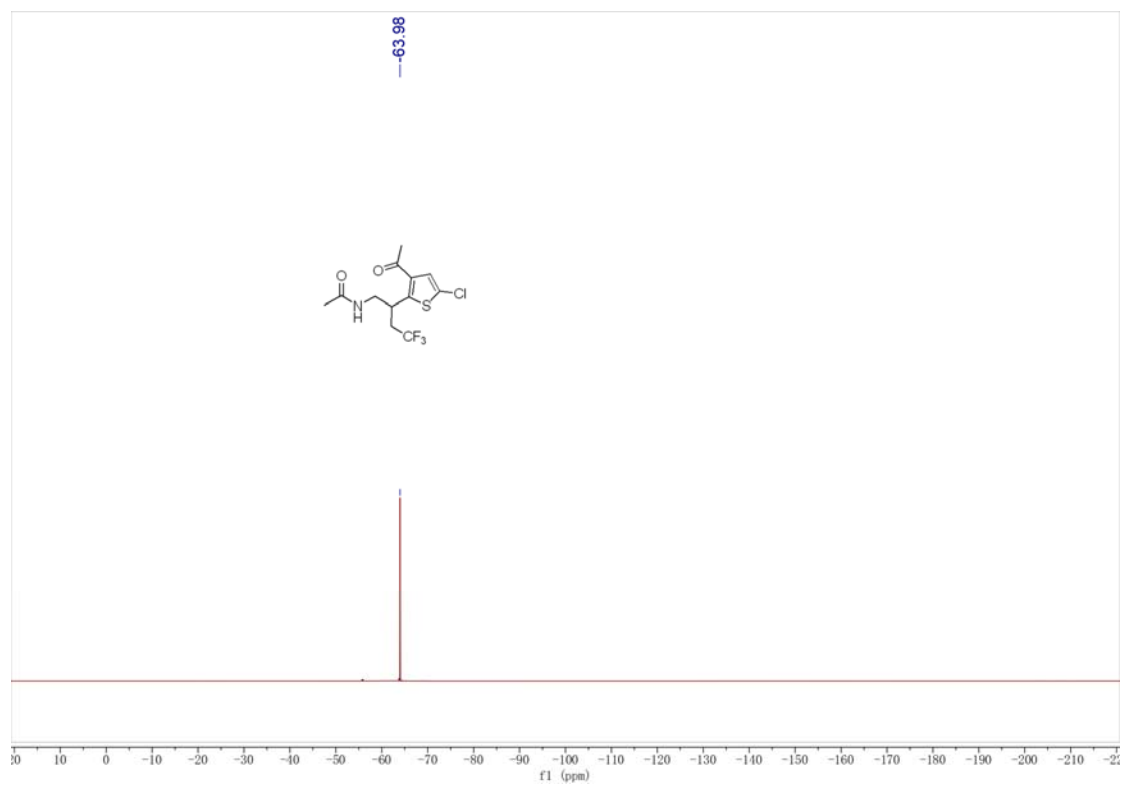

***N*-(4,4,4-trifluoro-2-(5-methyl-1,3,4-thiadiazol-2-yl)butyl)acetamide (3k)**

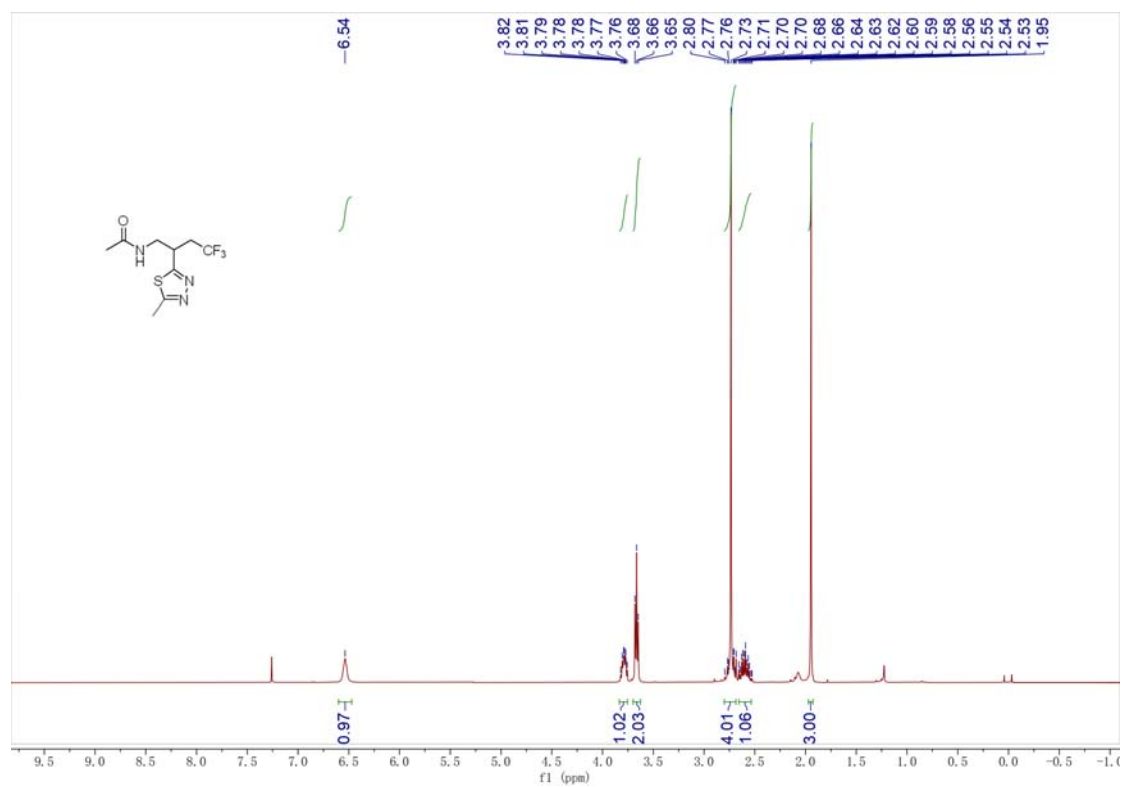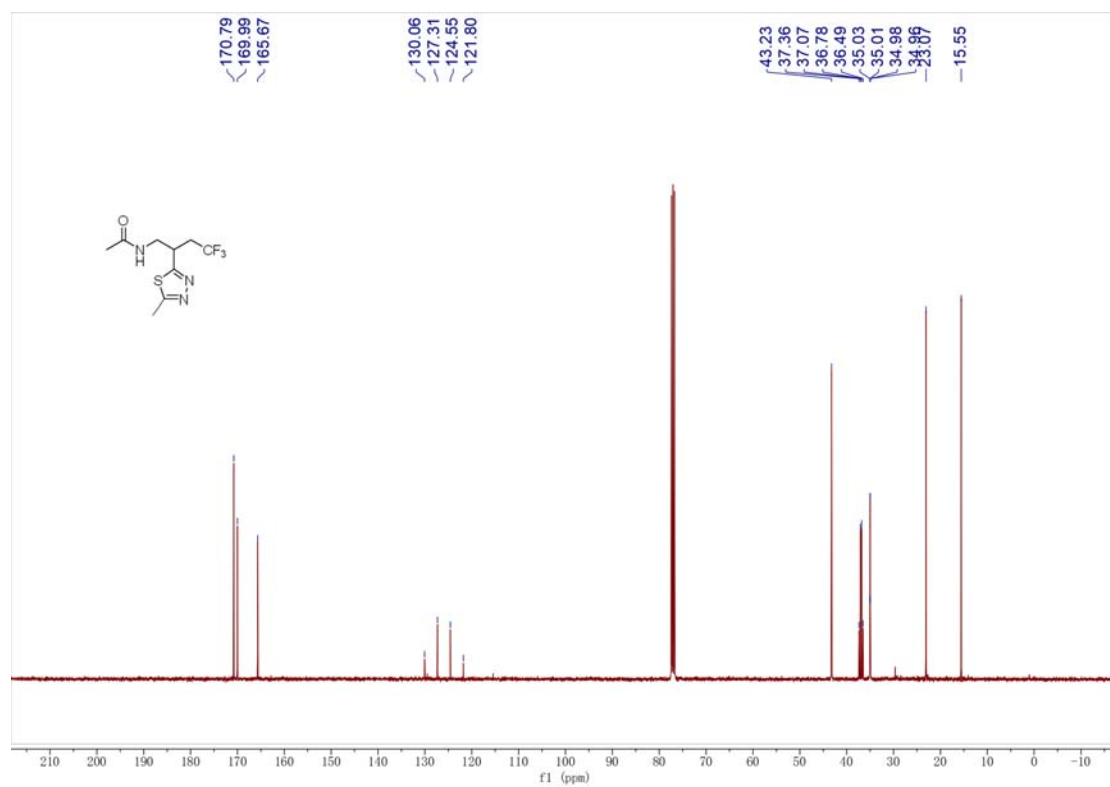

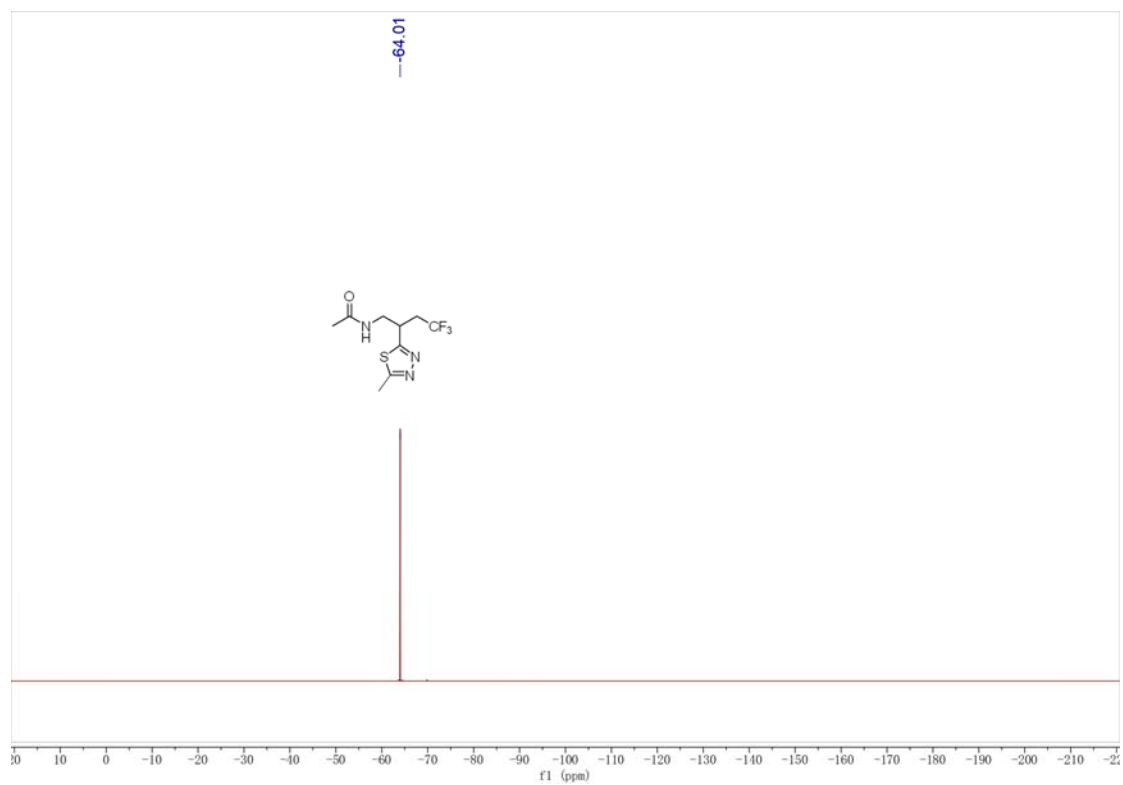



***N*-(4,4,4-trifluoro-2-(pyrimidin-2-yl)butyl)acetamide (31)**

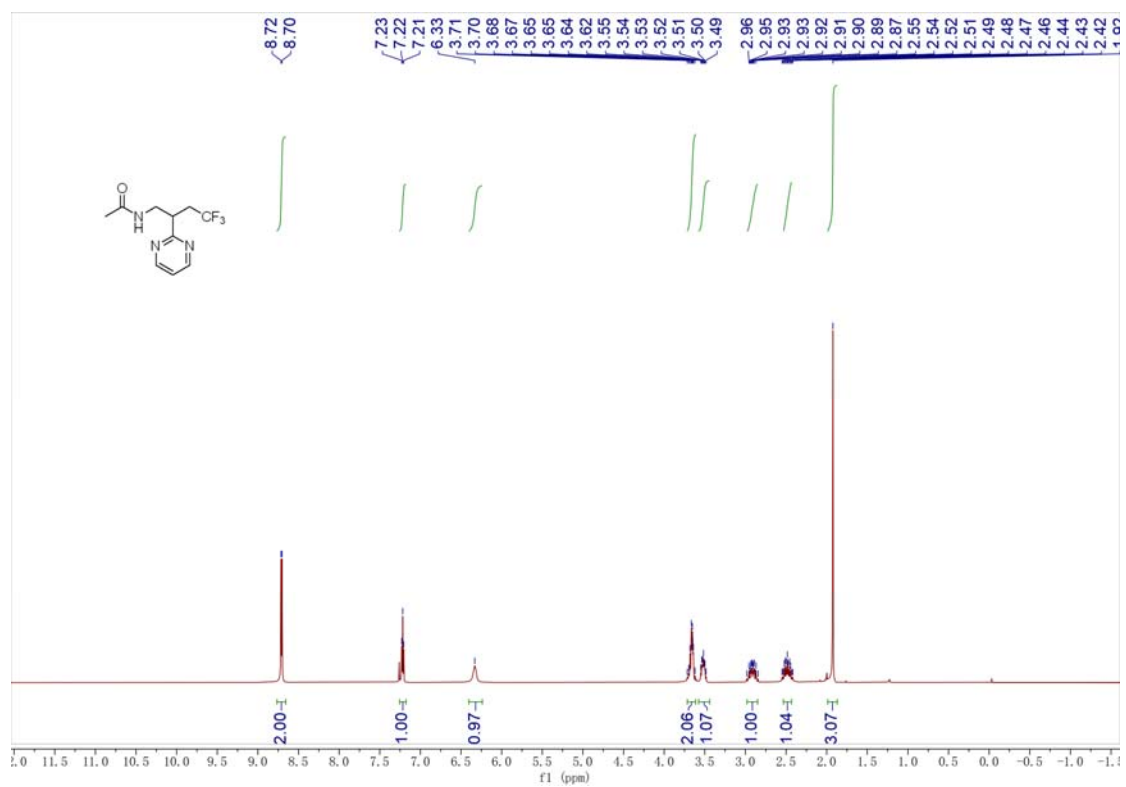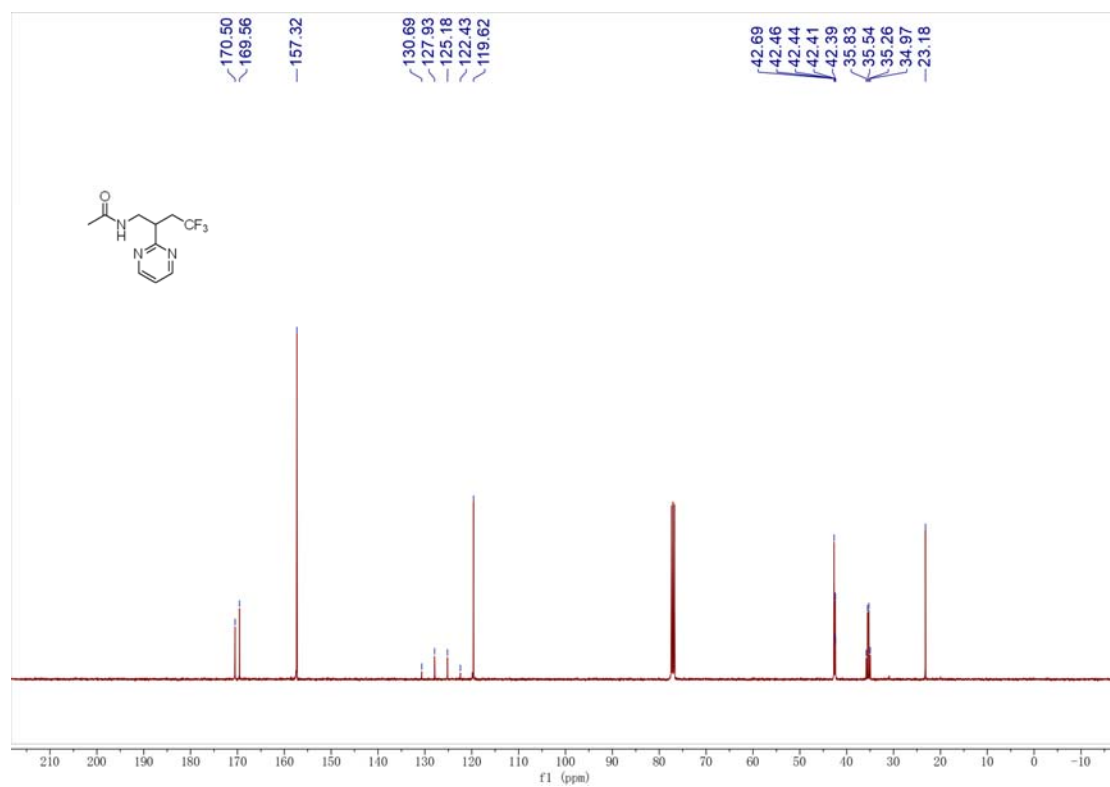

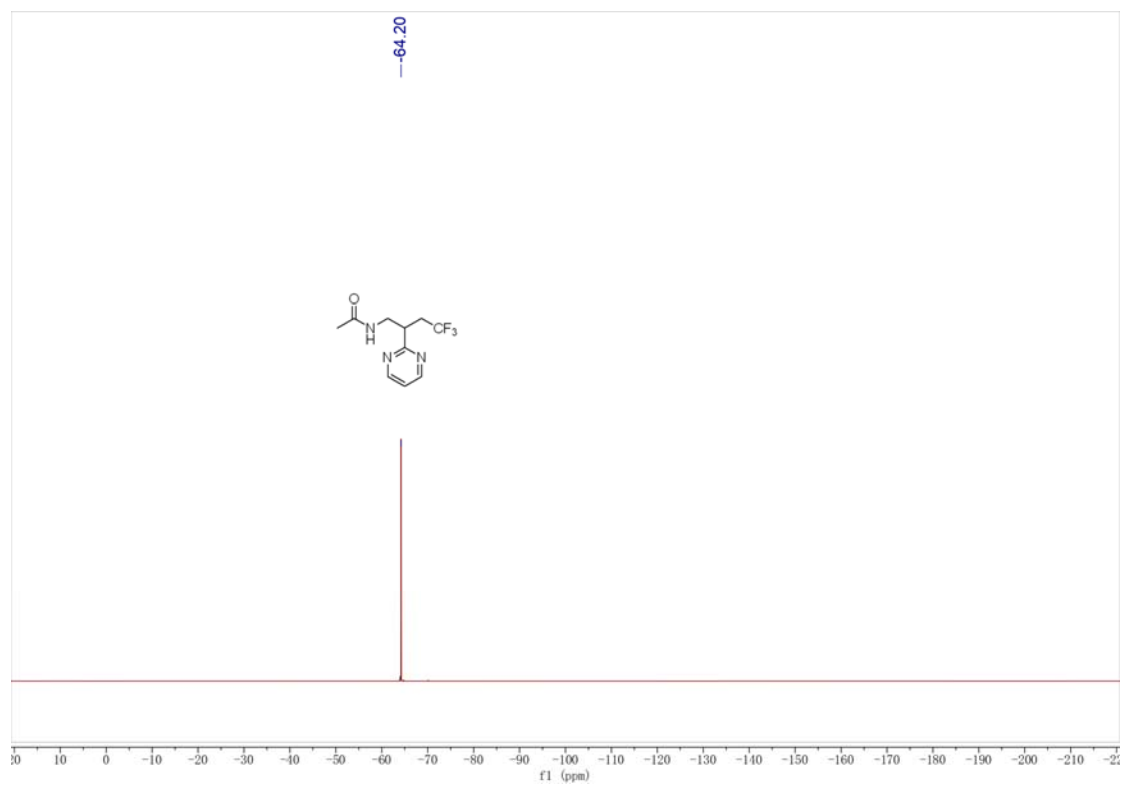

***N*-(4,4,4-trifluoro-2-(pyridin-2-yl)butyl)acetamide (3m)**

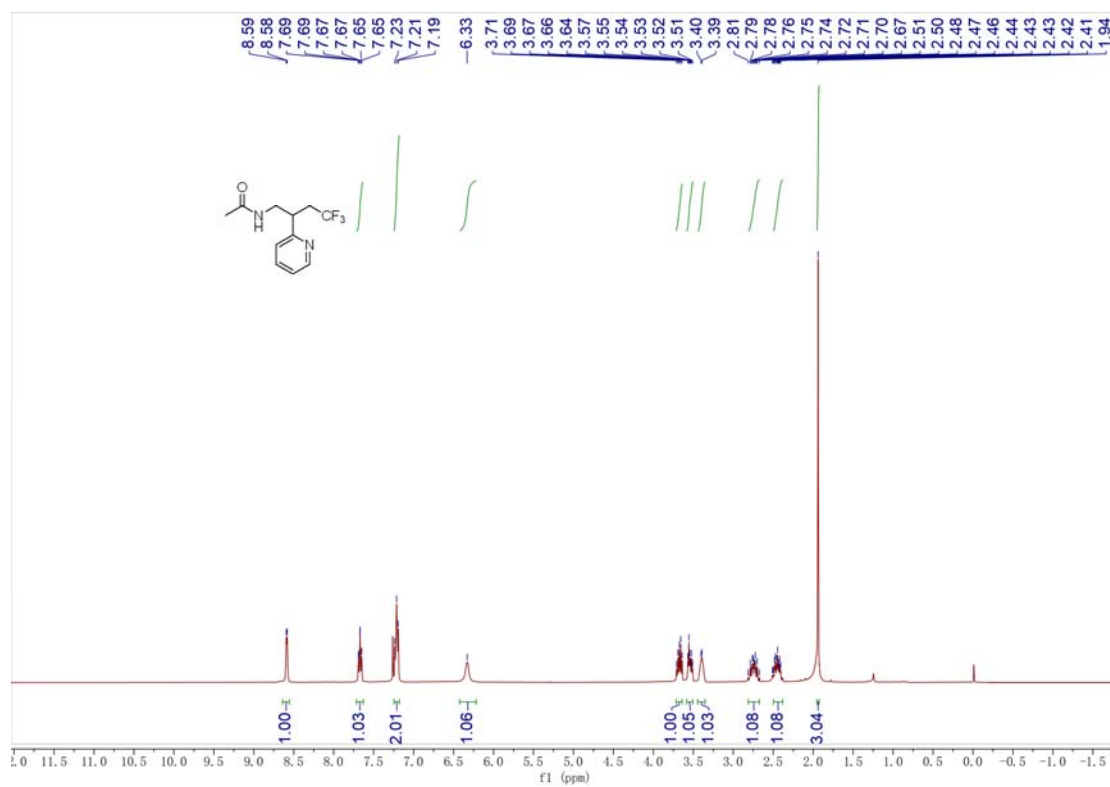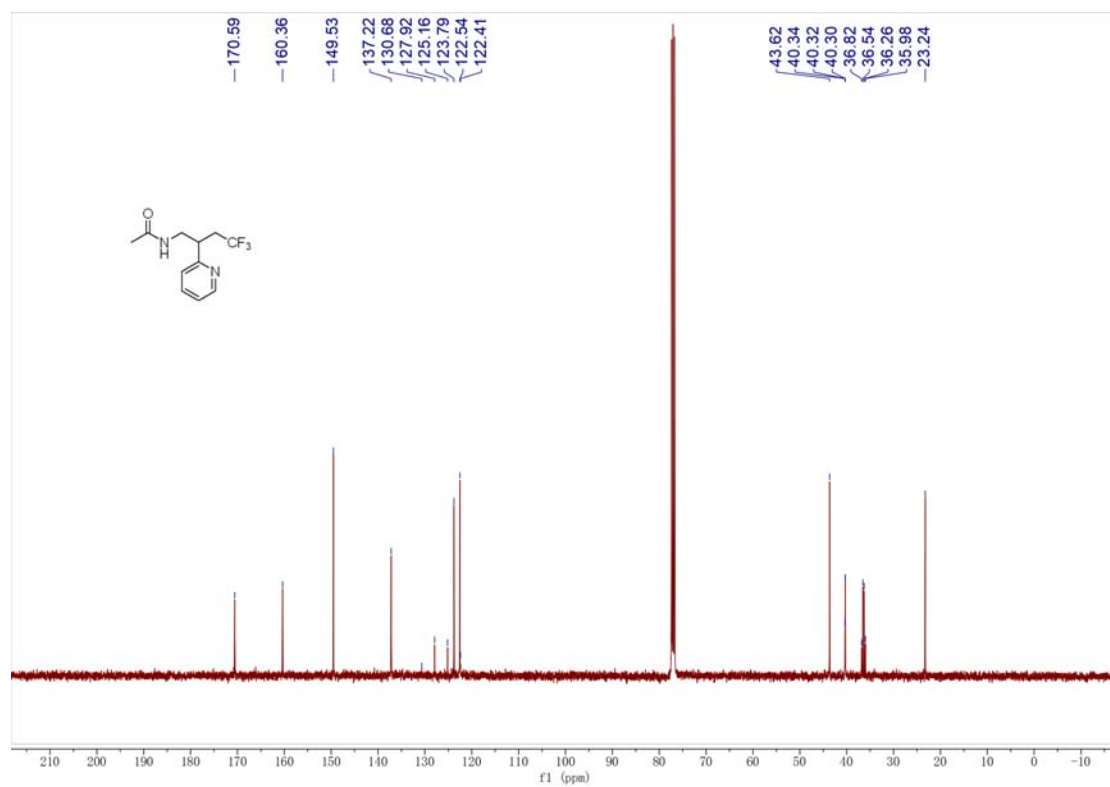

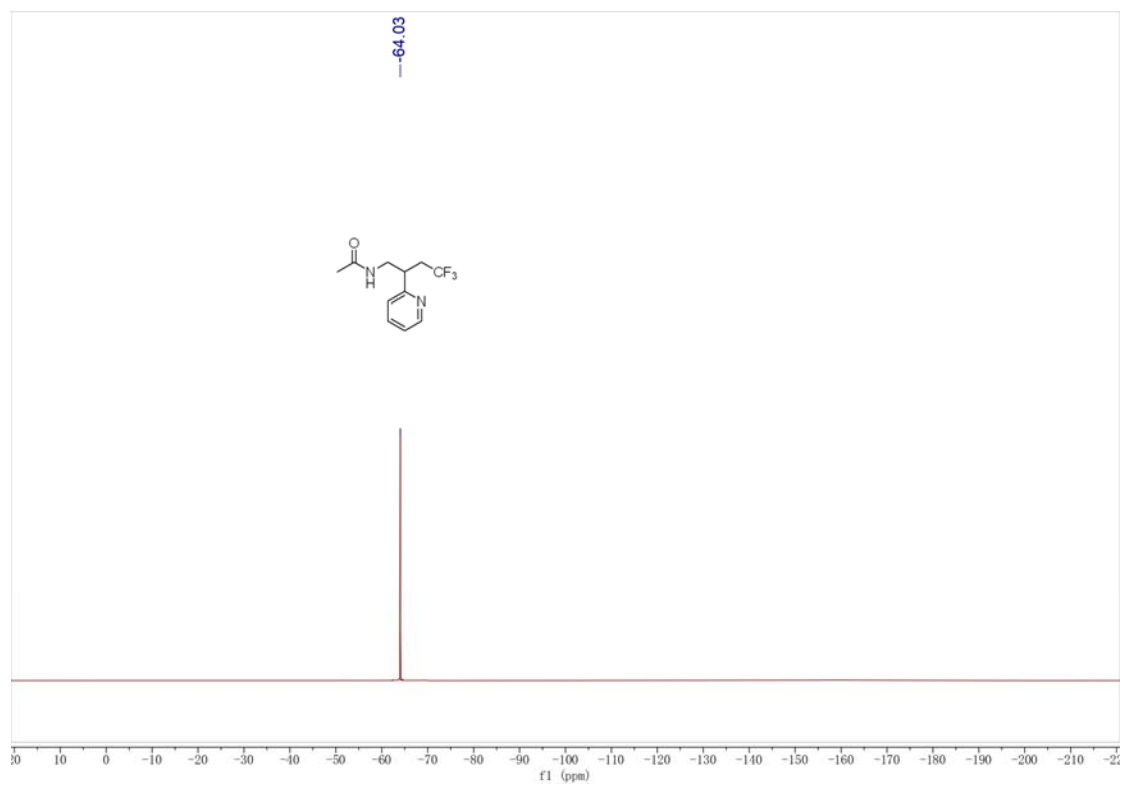

***N*-(4,4,4-trifluoro-2-(quinolin-8-yl)butyl)acetamide (3n)**

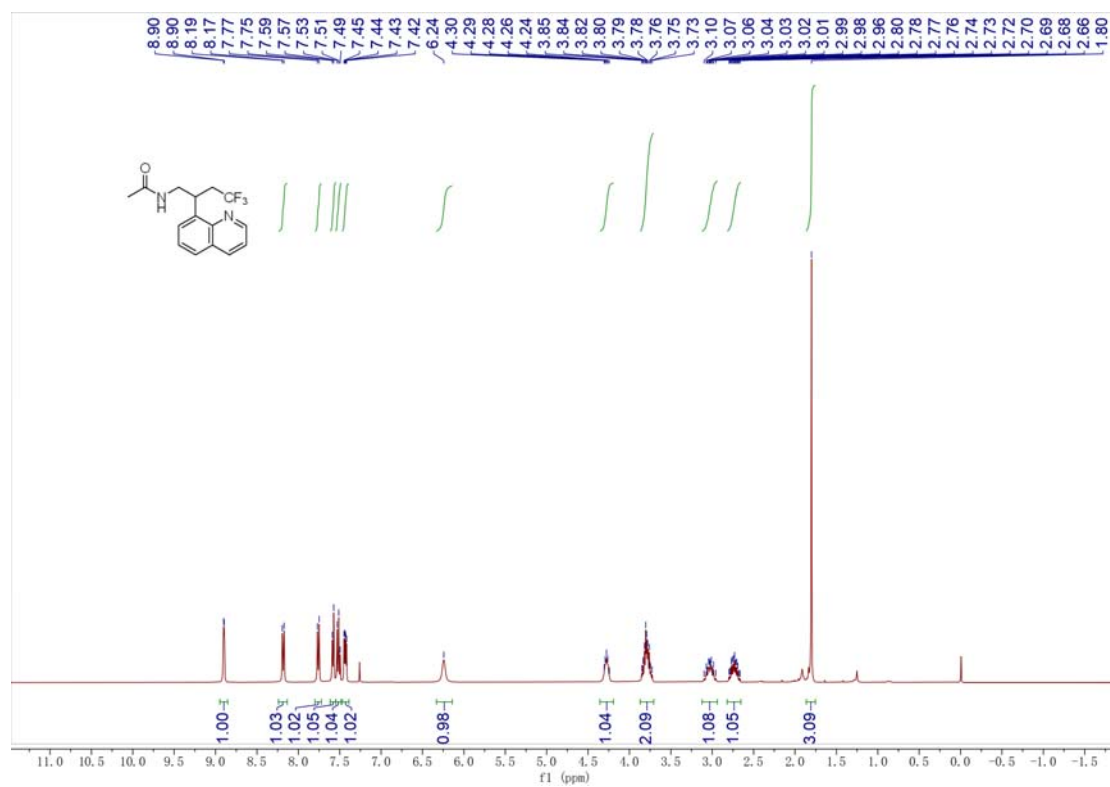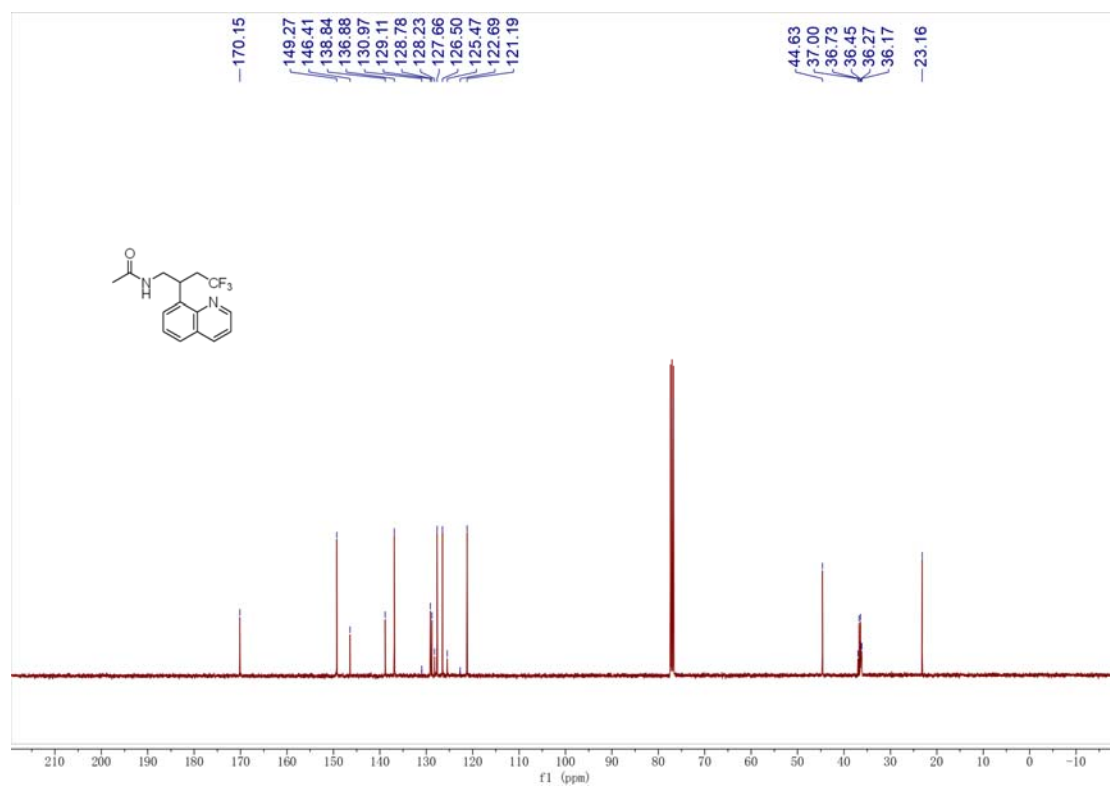

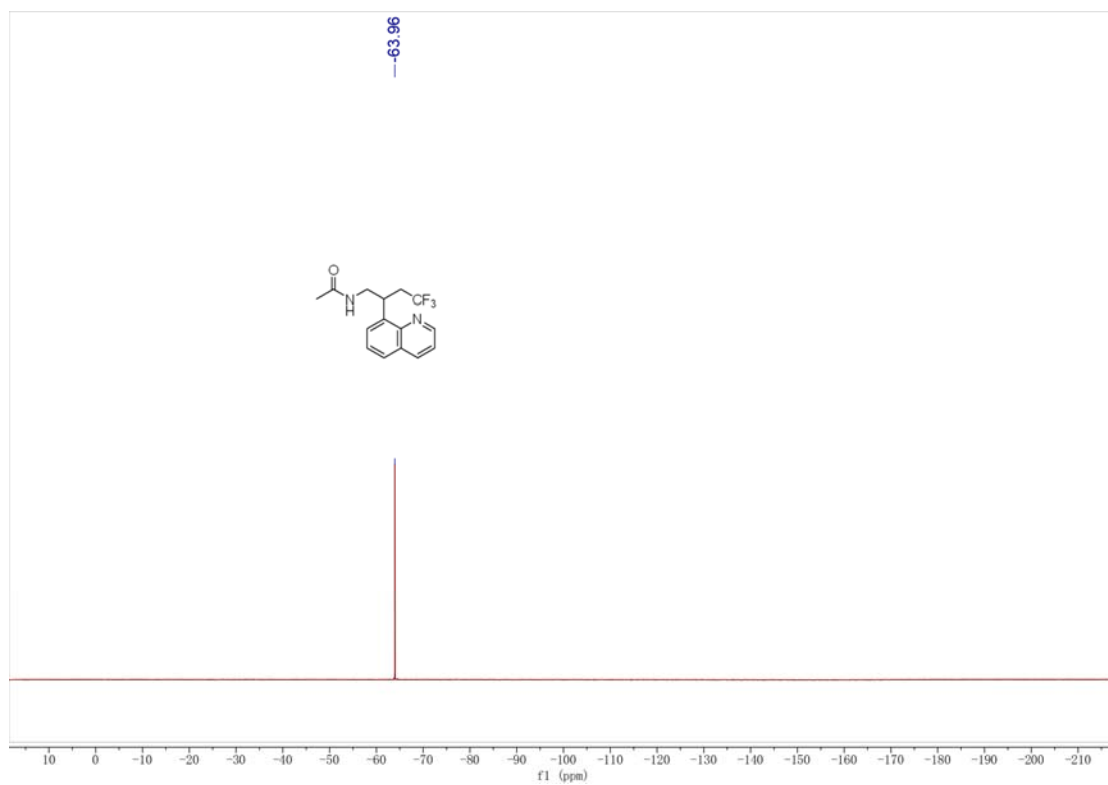

***N*-(4,4,4-trifluoro-2-(naphthalen-1-yl)butyl)acetamide (30)**

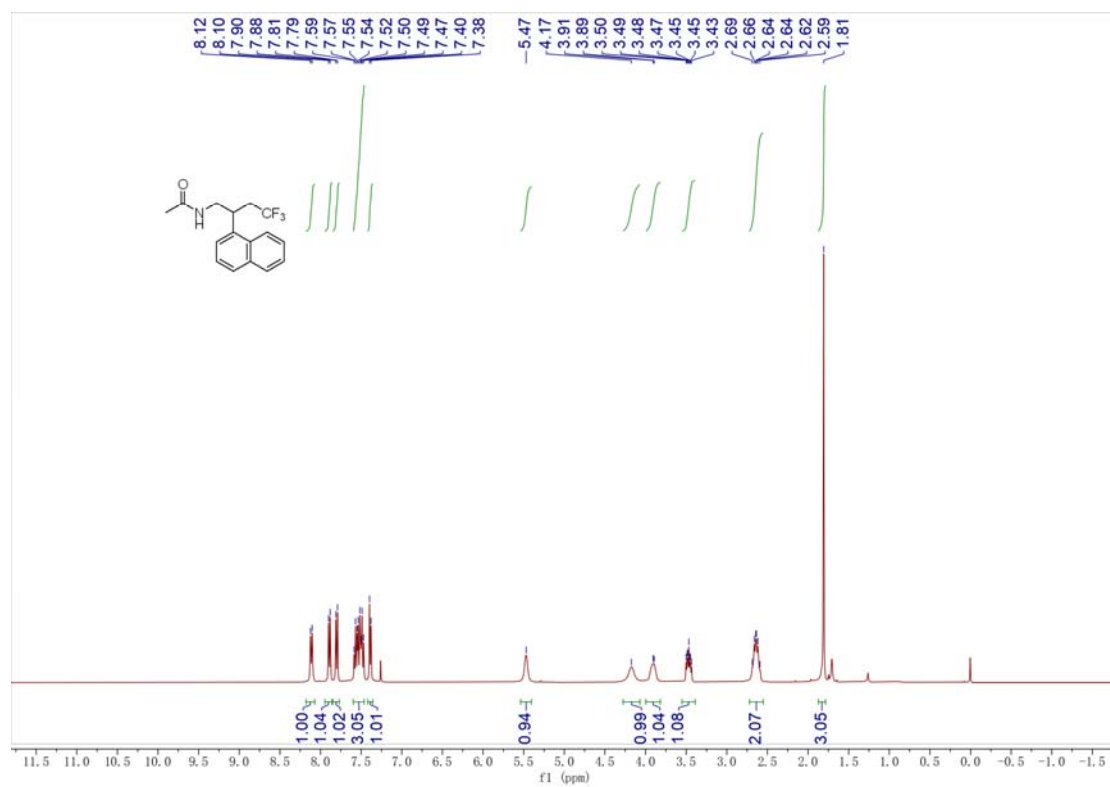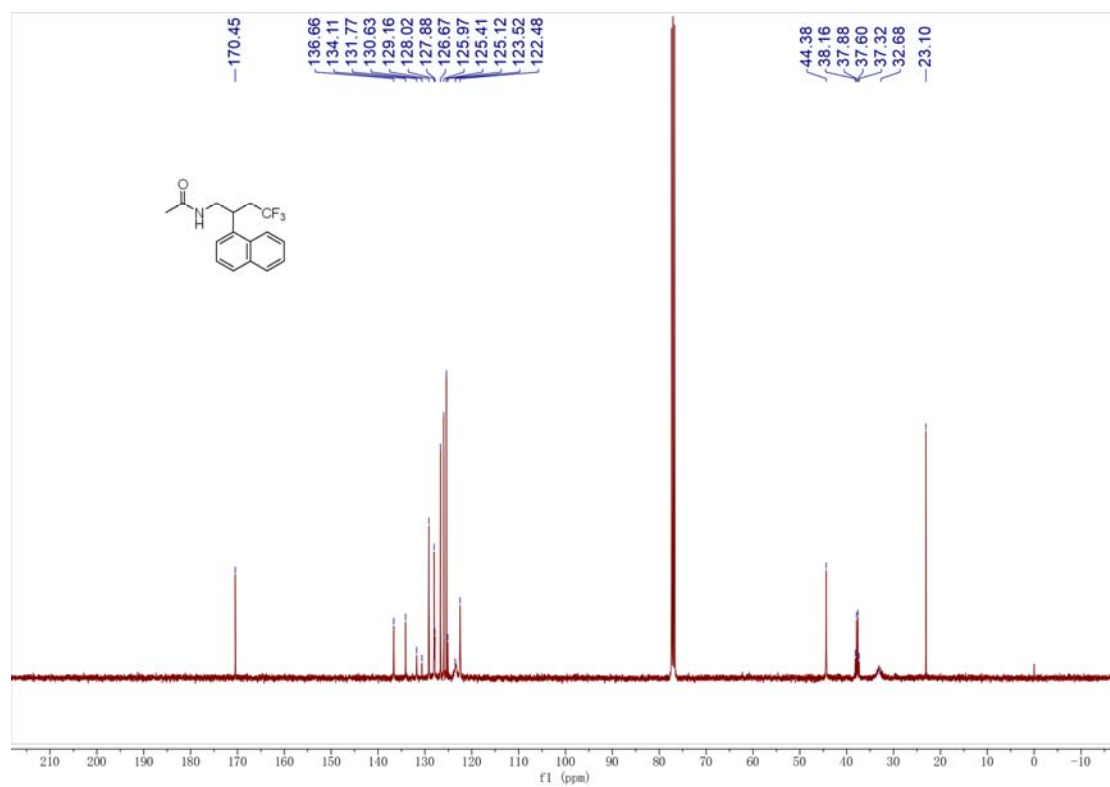

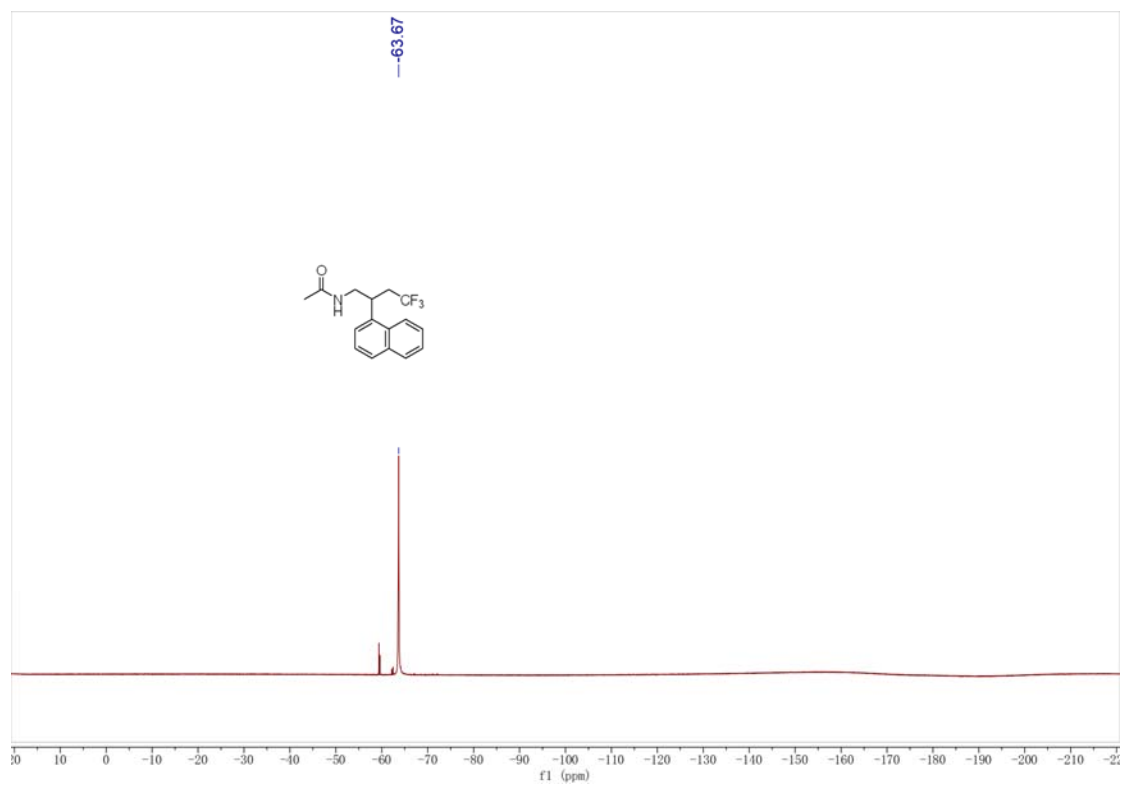



***N*-2-(benzo[d]thiazol-2-yl)-4,4,4-trifluoro-2-methylbutylacetamide (3p)**

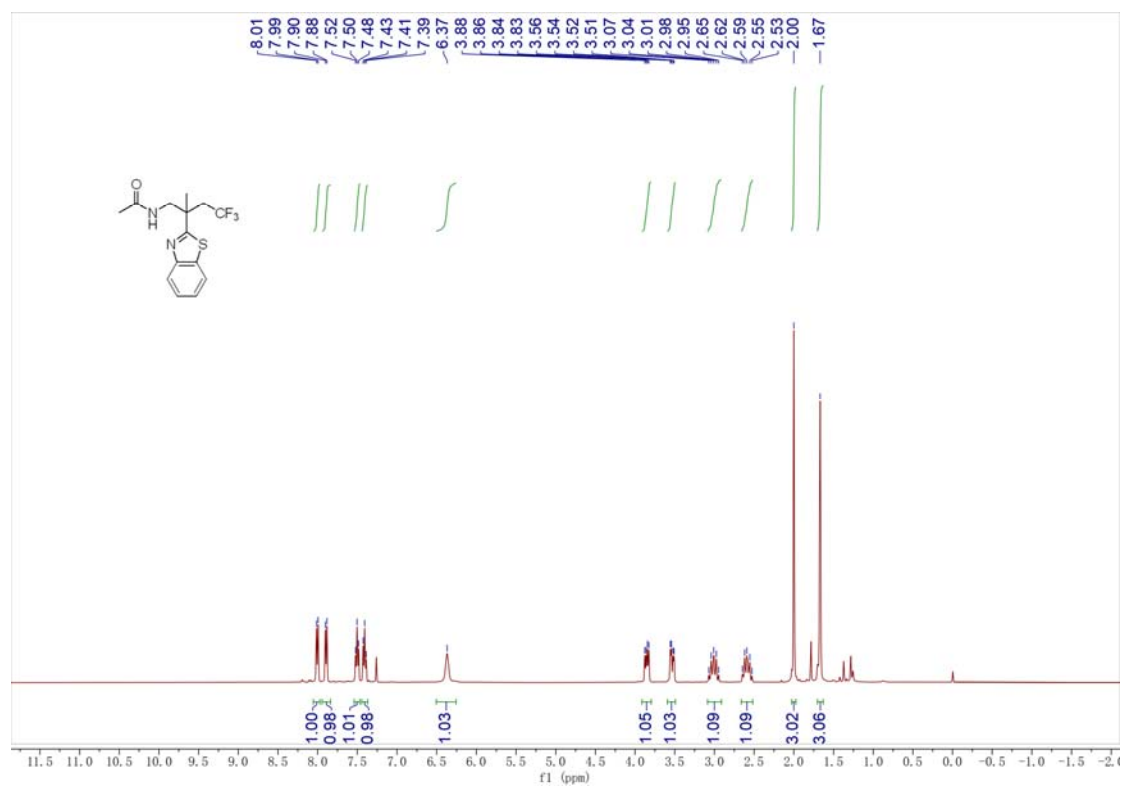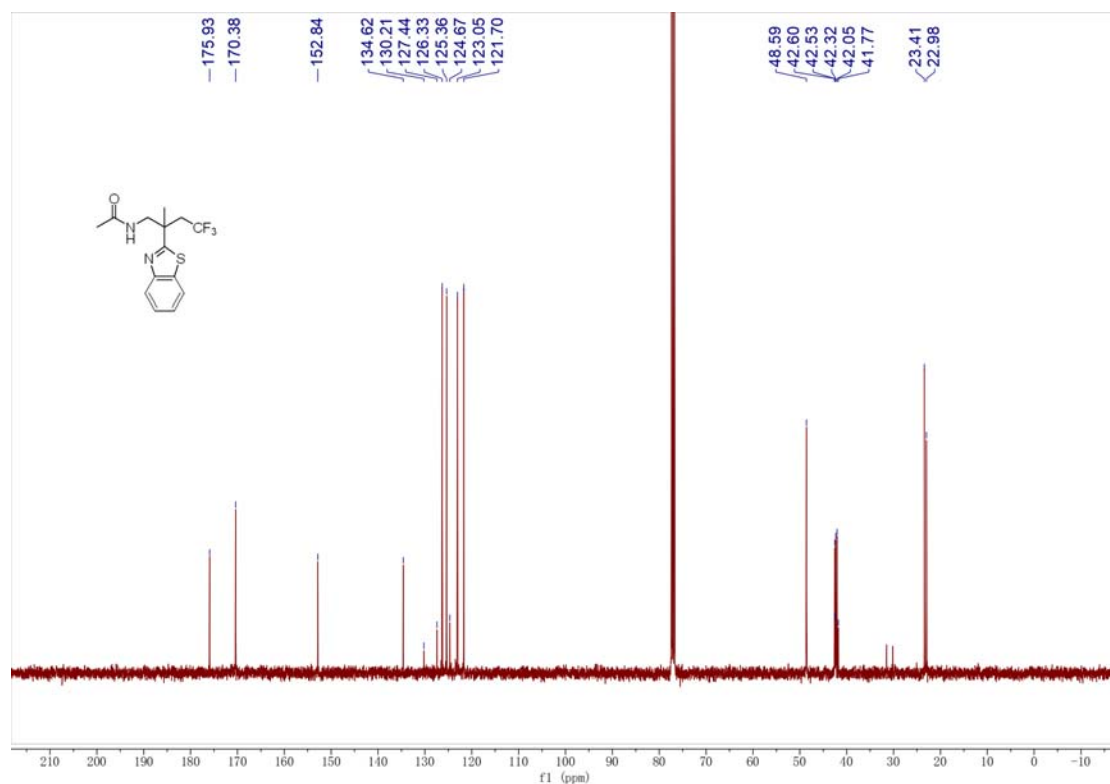

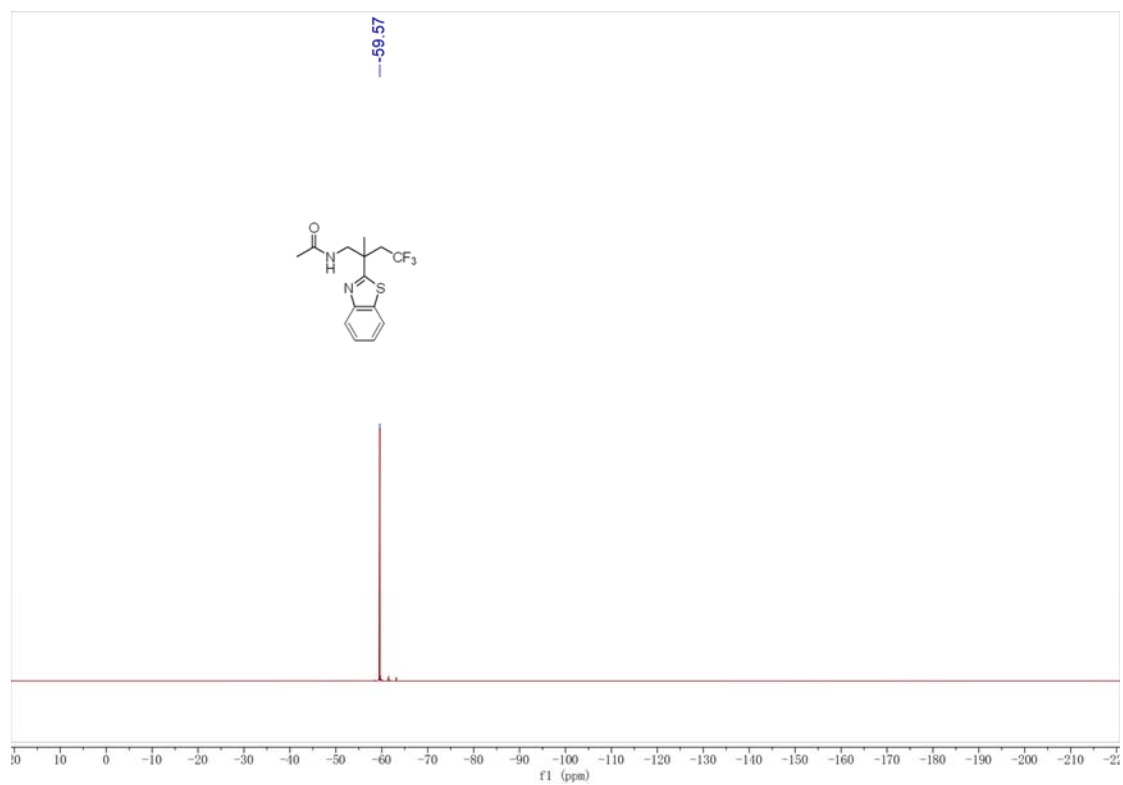

***N*-[3-(benzo[d]thiazol-2-yl)-5,5,5-trifluoropentyl]acetamide (3q)**

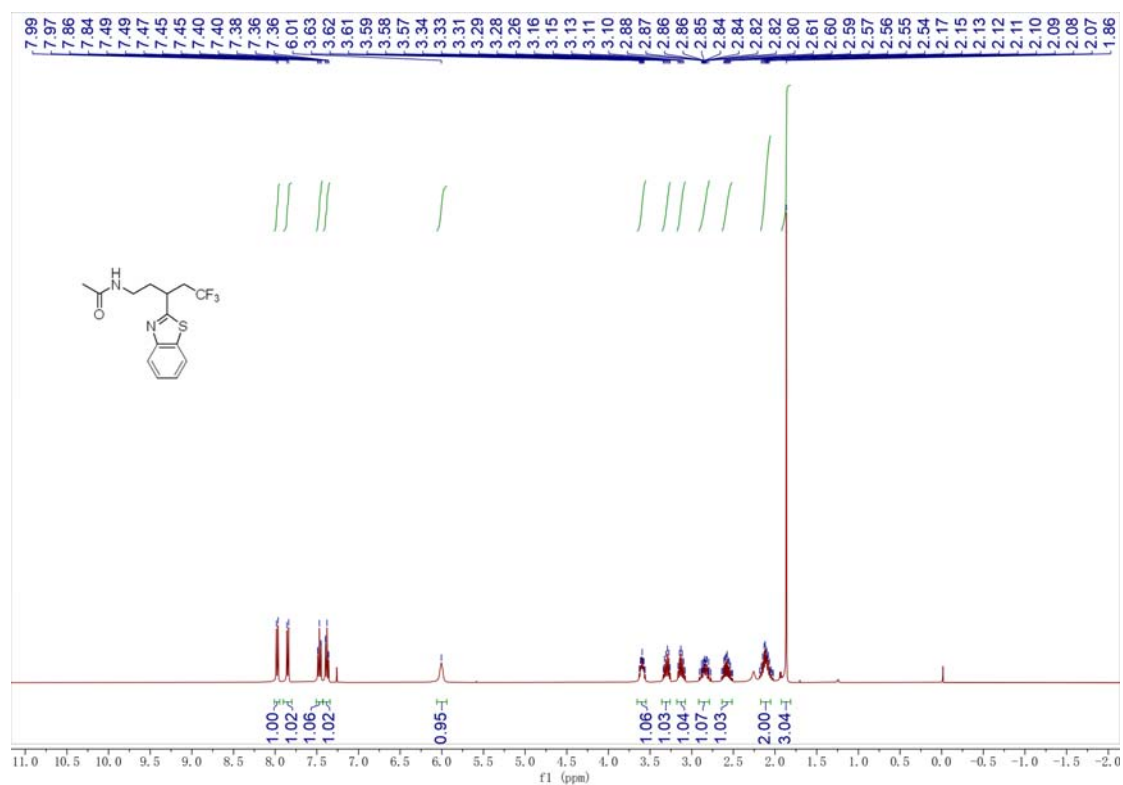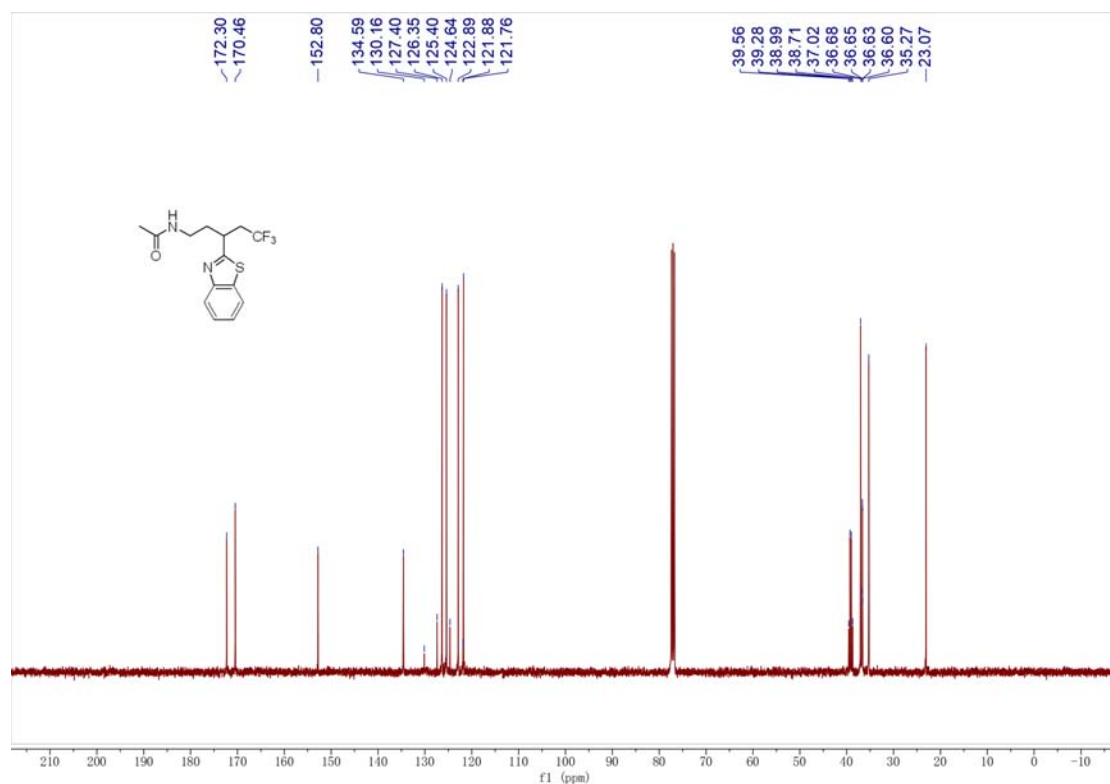

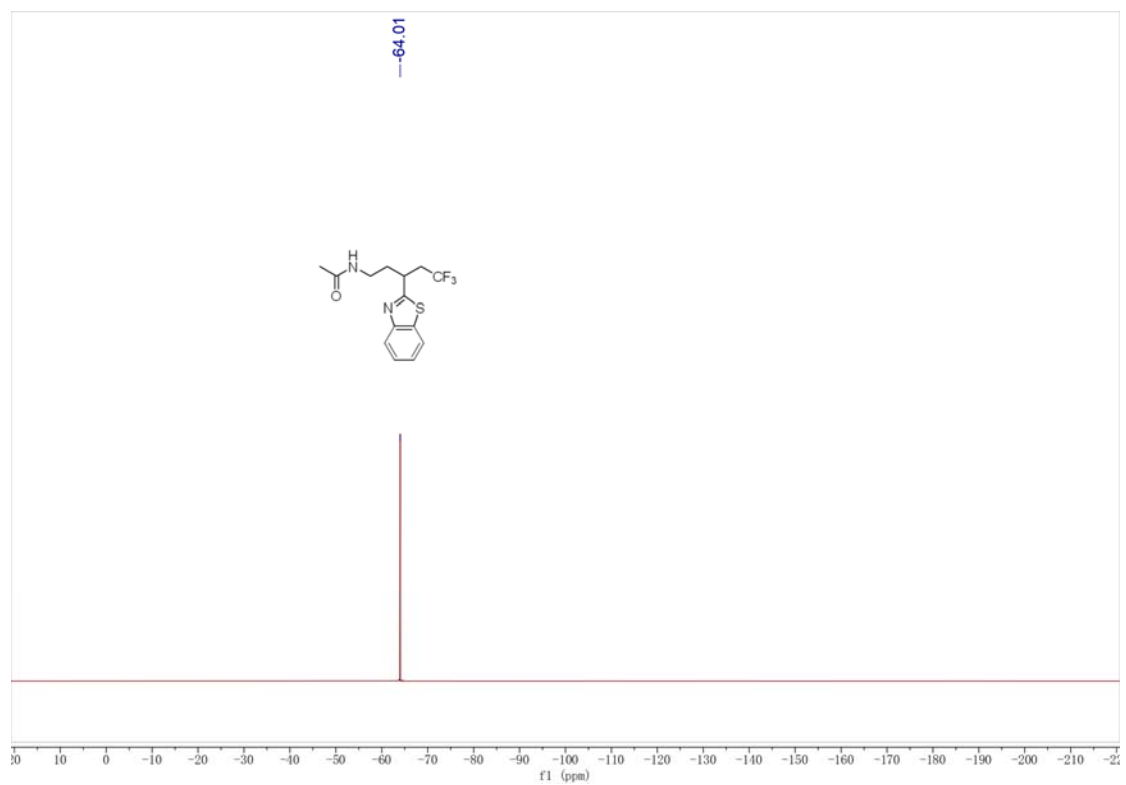

**(E)-N-(2-(benzo[d]thiazol-2-yl)-4,4,4-trifluorobut-2-en-1-yl)acetamide (3r)**

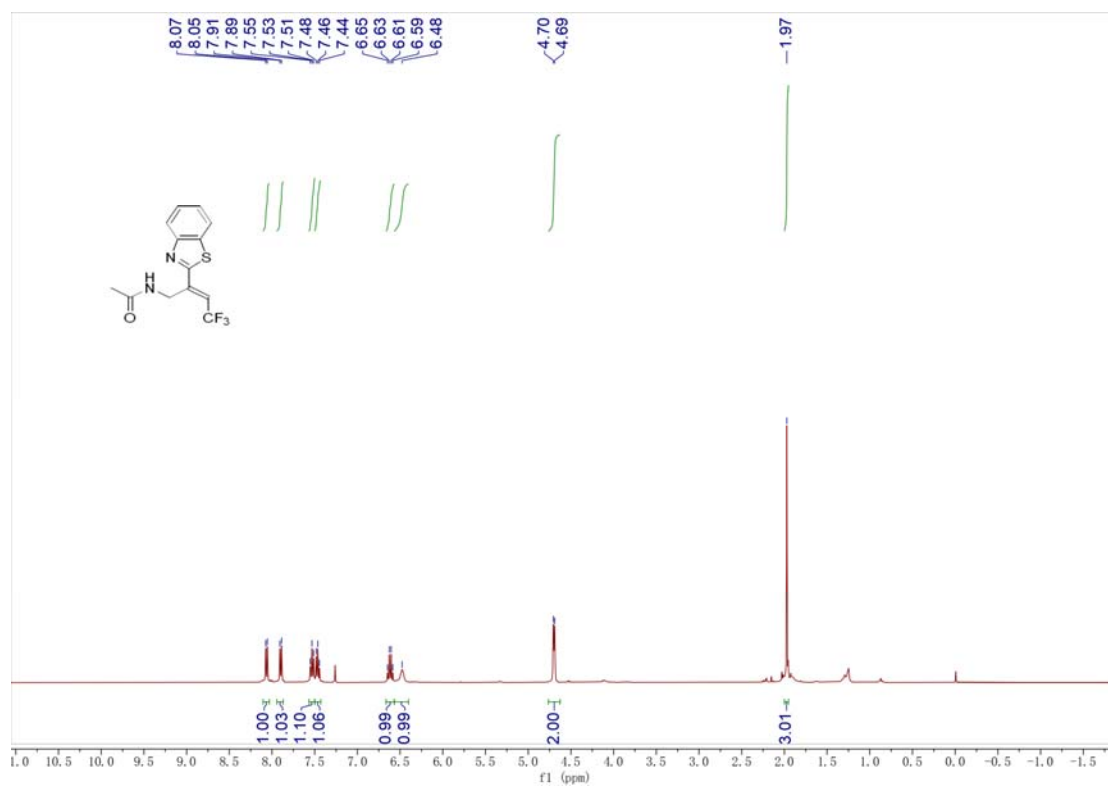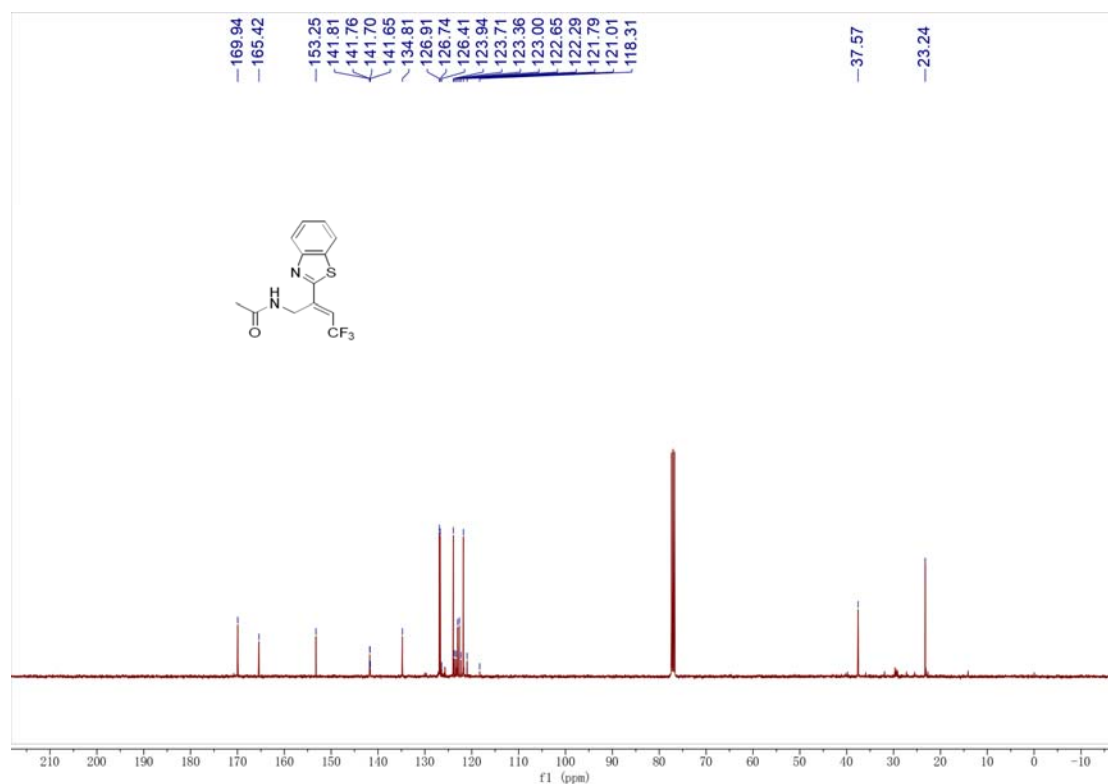

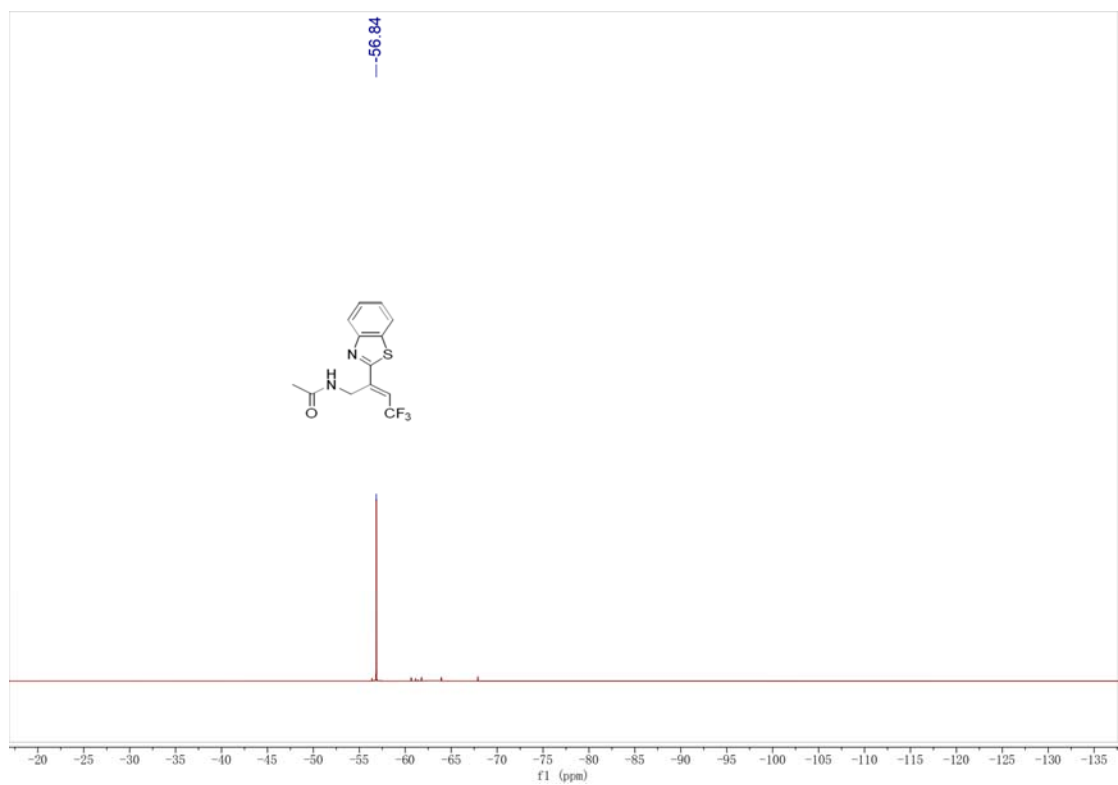

***N*-2-(benzo[d]thiazol-2-yl)-4,4-difluorobutyl)acetamide (3s)**

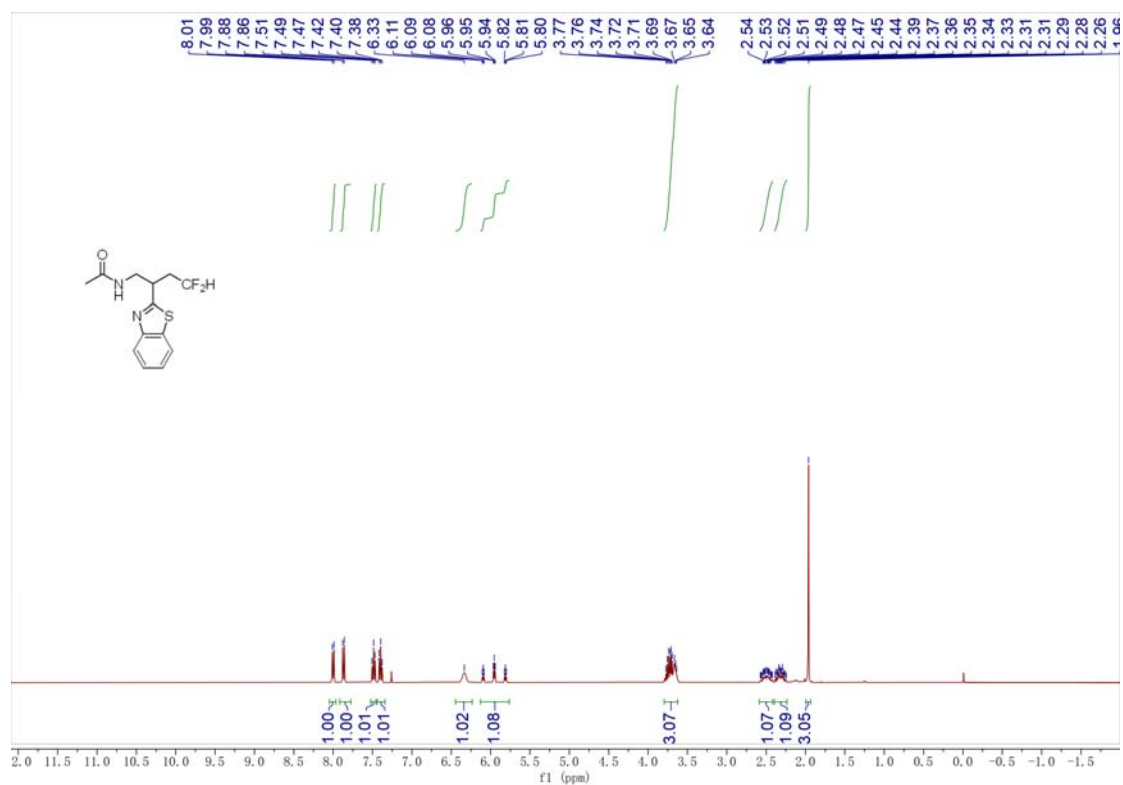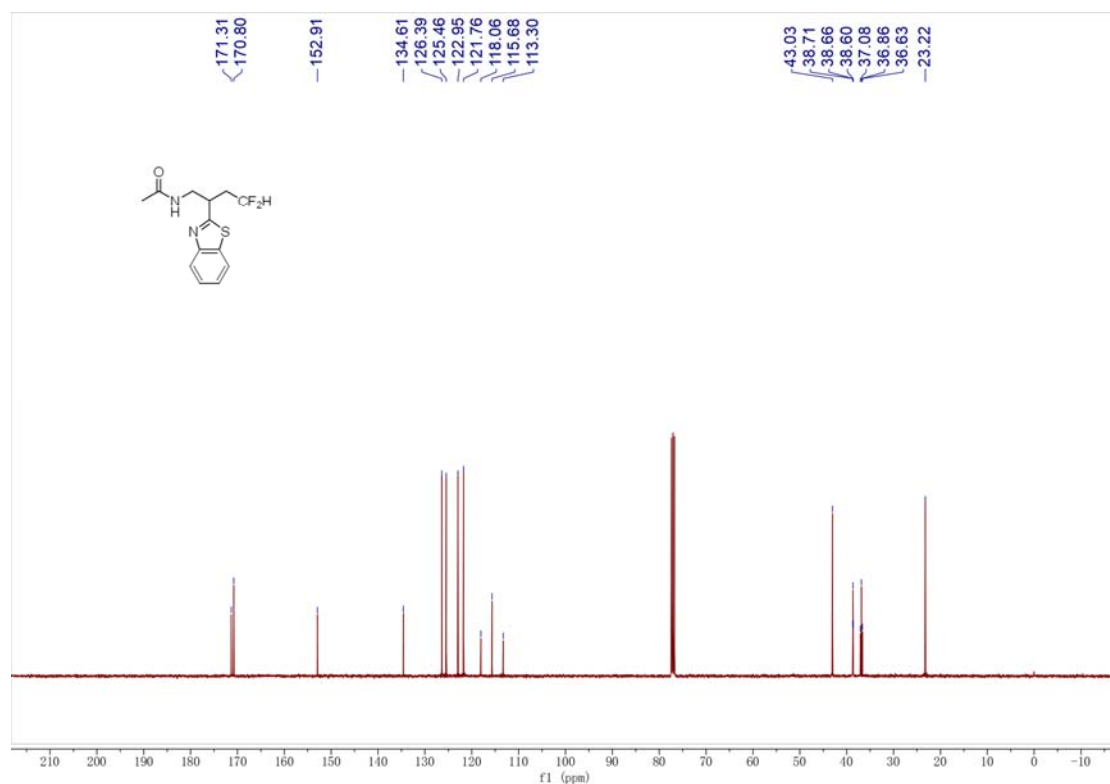

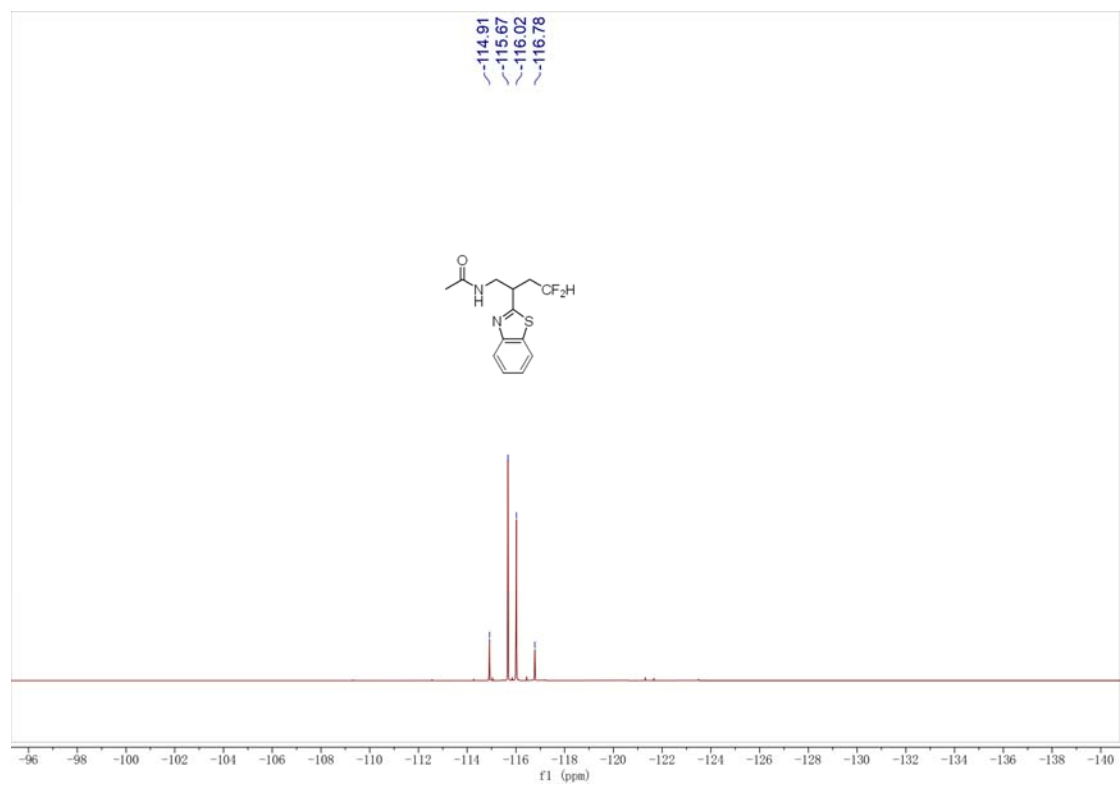



***N*-((1*R*,2*S*,3*R*)-2-(benzo[d]thiazol-2-yl)-3-(trifluoromethyl)cyclohexyl)acetamide (**3u**):**

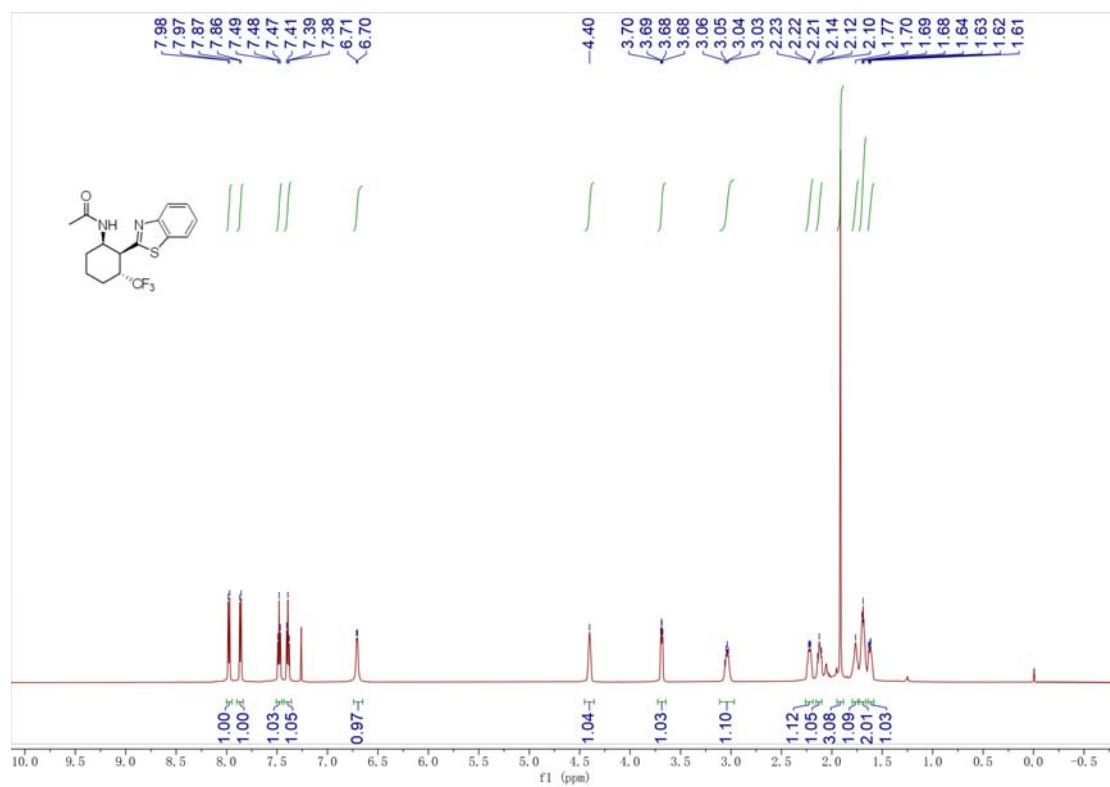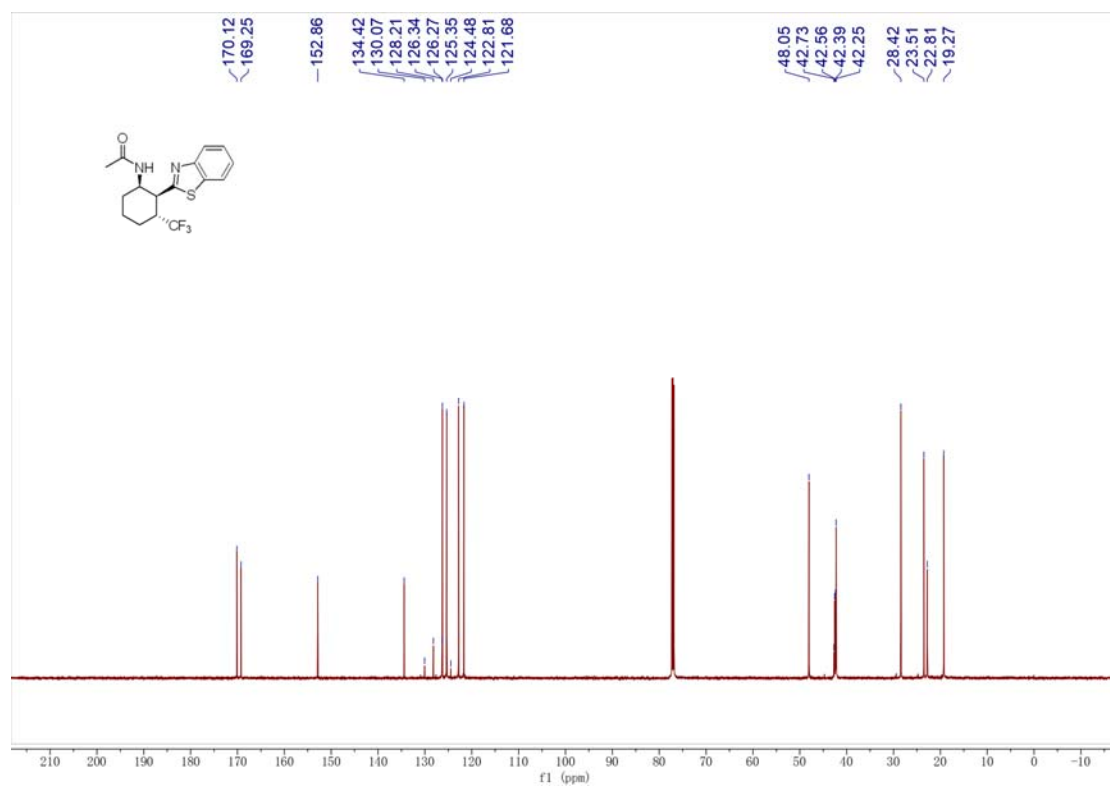

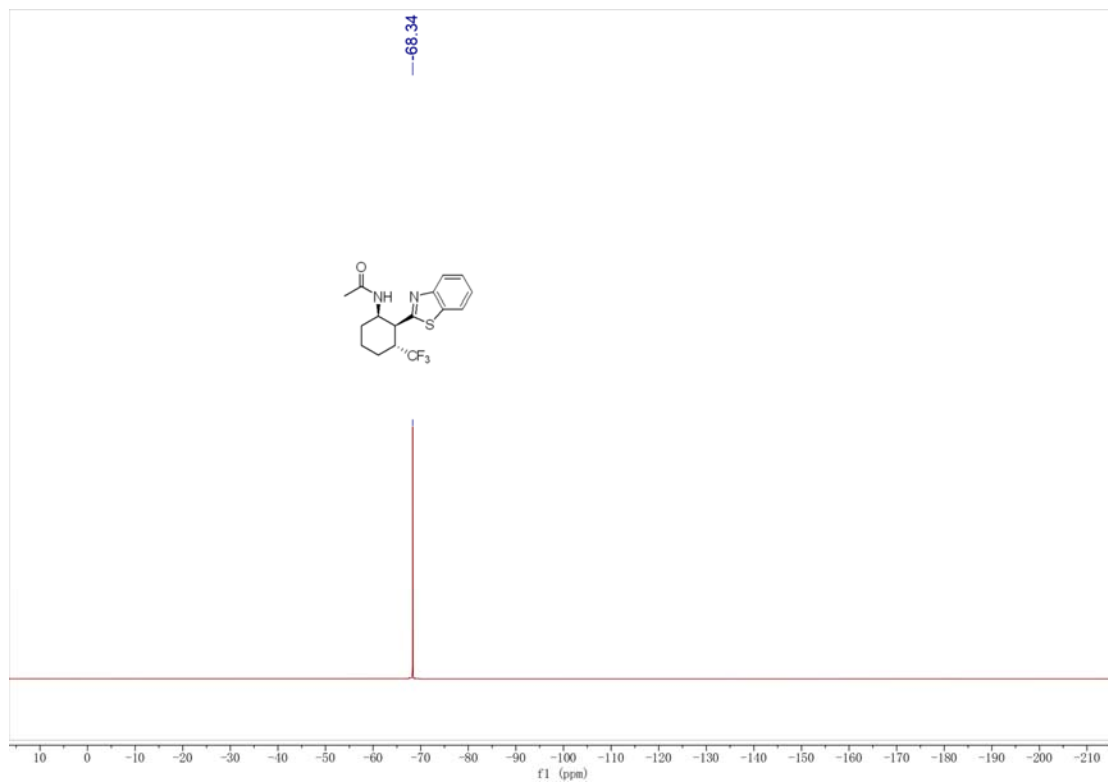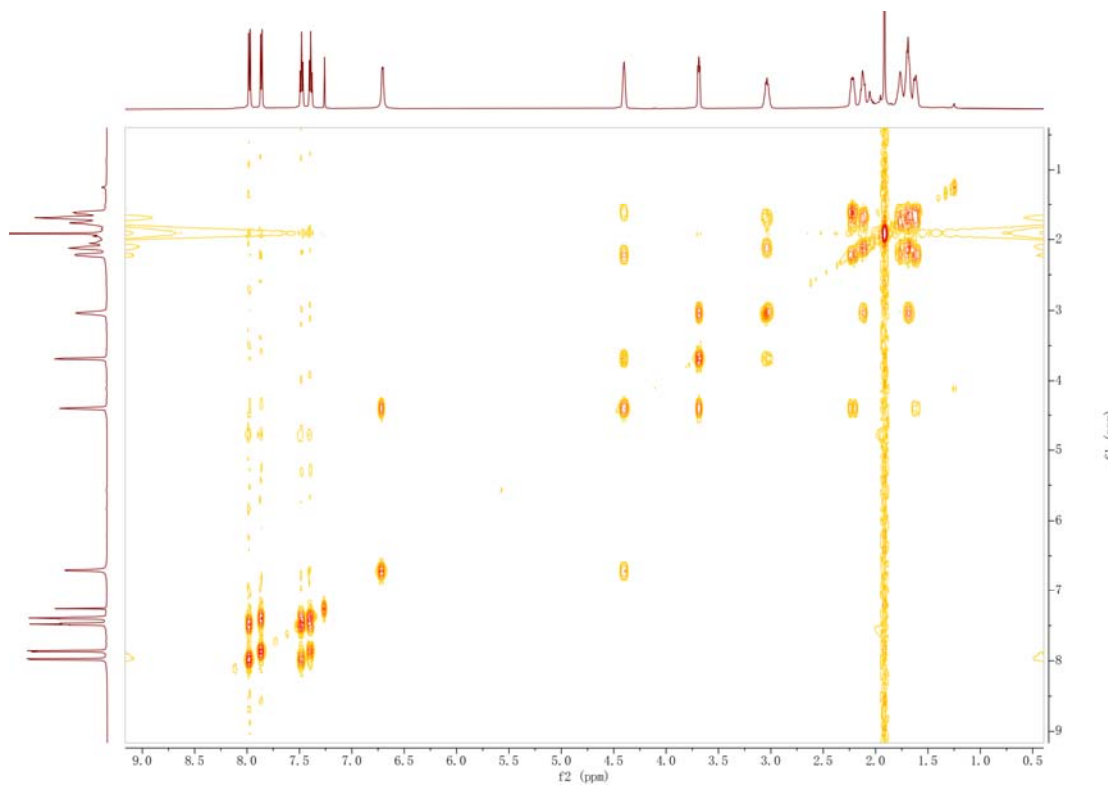

HMBC

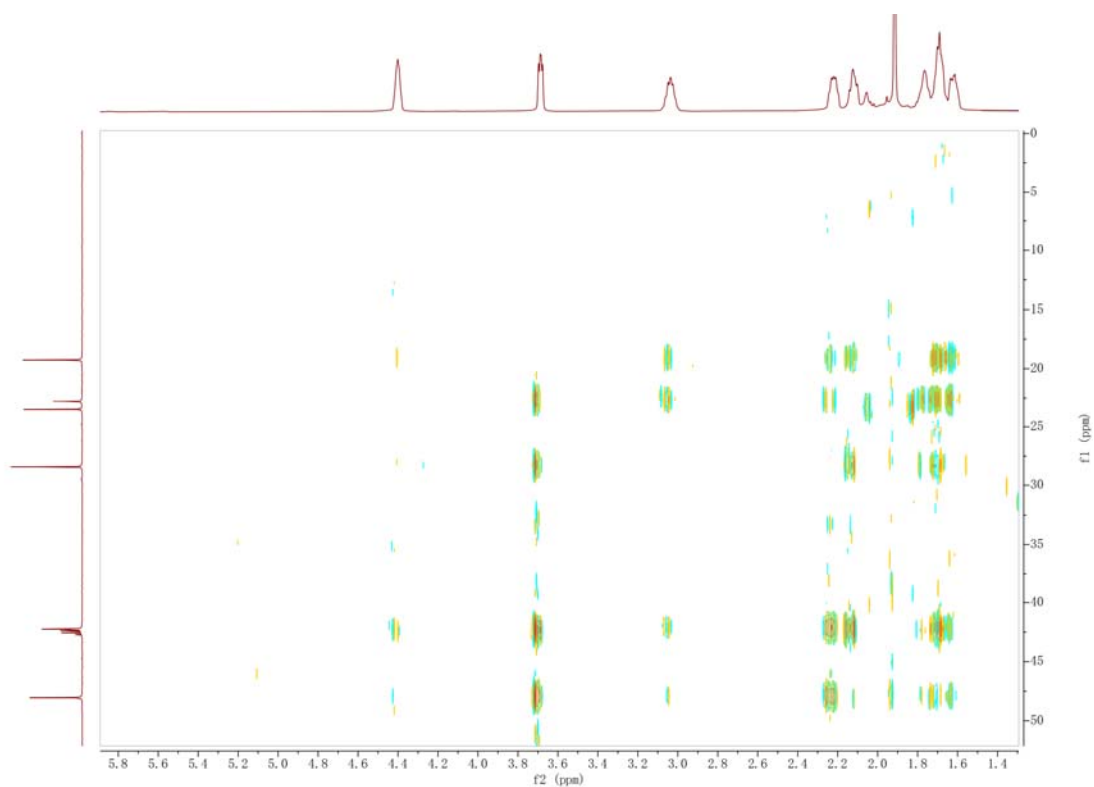

***N***-3-(benzo[d]thiazol-2-yl)-3-methyl-2-(trifluoromethyl)butylacetamide (**3t**)

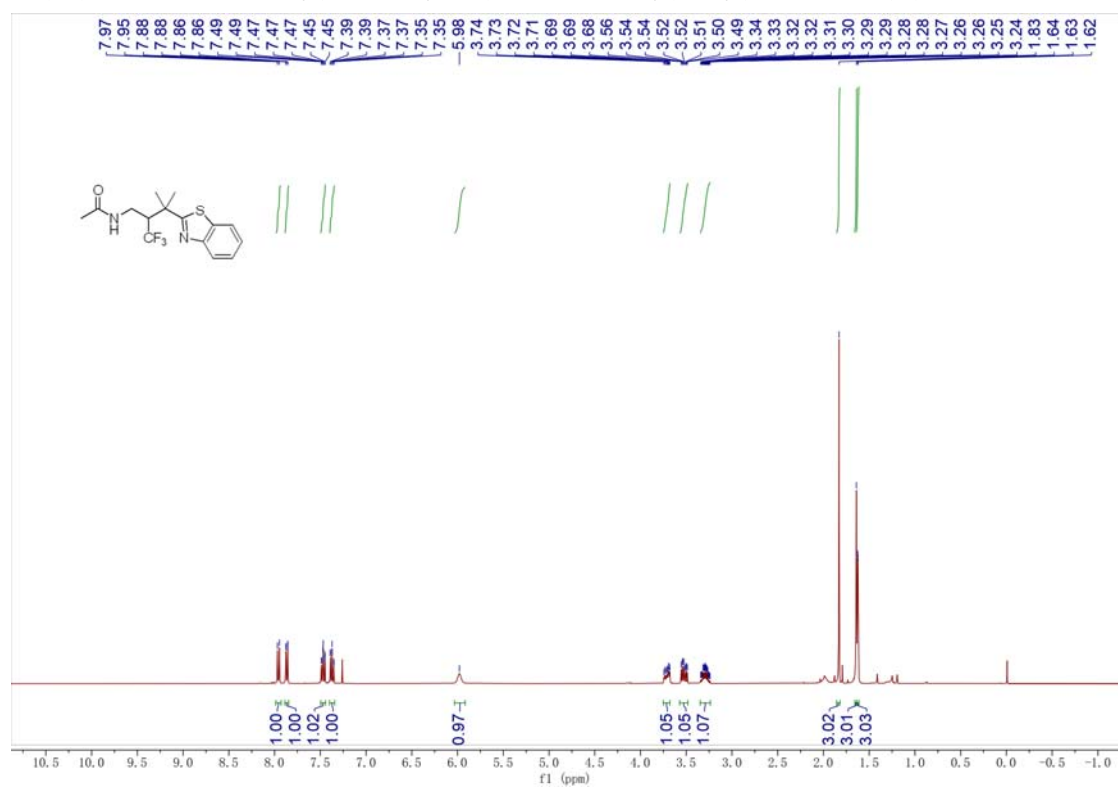

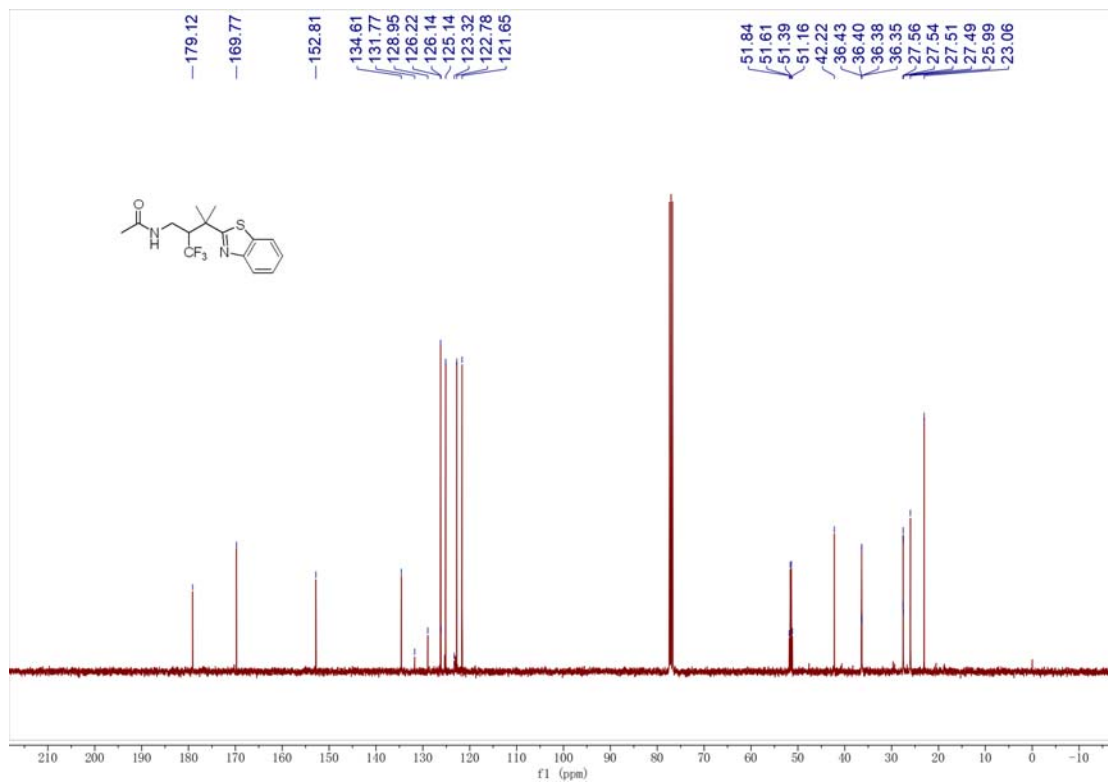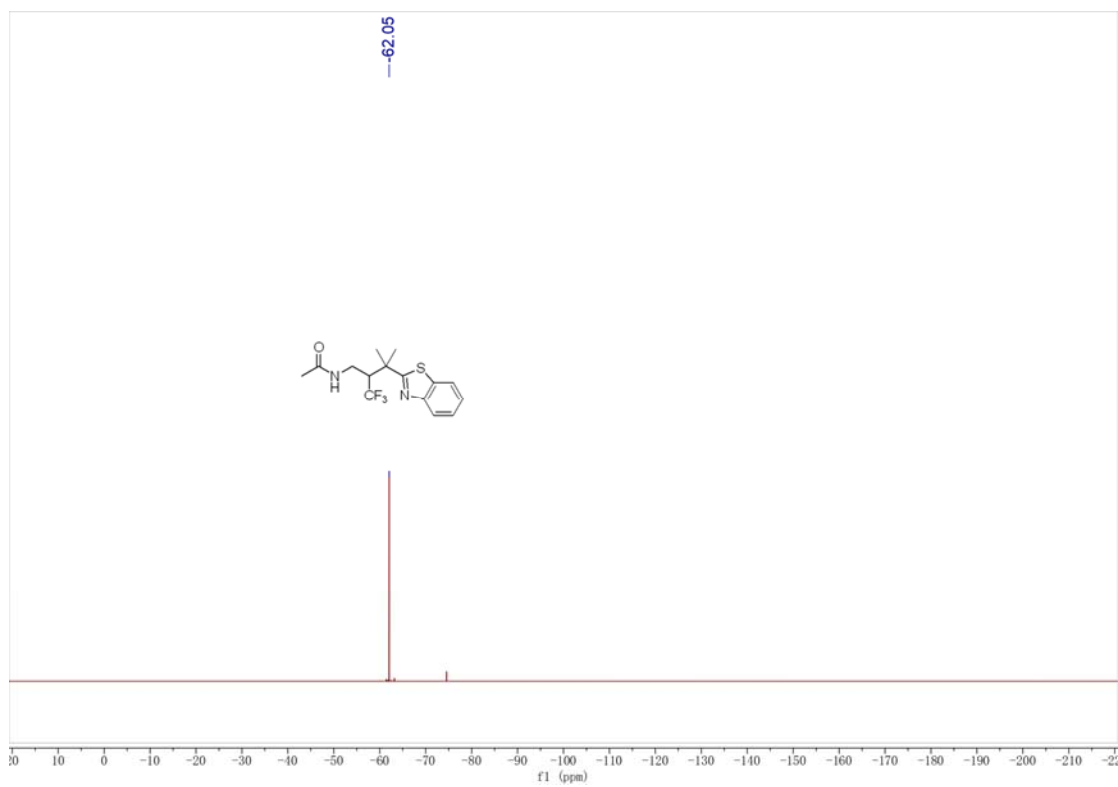

***N*-((2*S*,3*S*)-3-(benzo[*d*]thiazol-2-yl)-5,5,5-trifluoropentan-2-yl)acetamide (3v)**

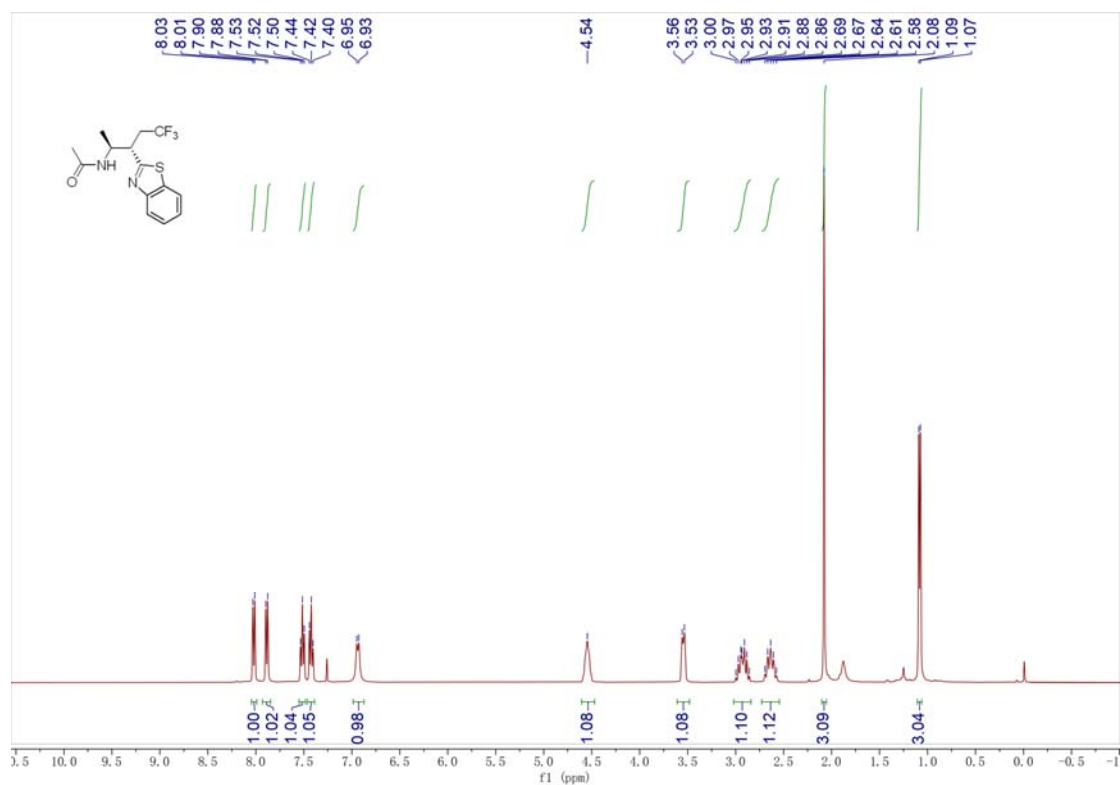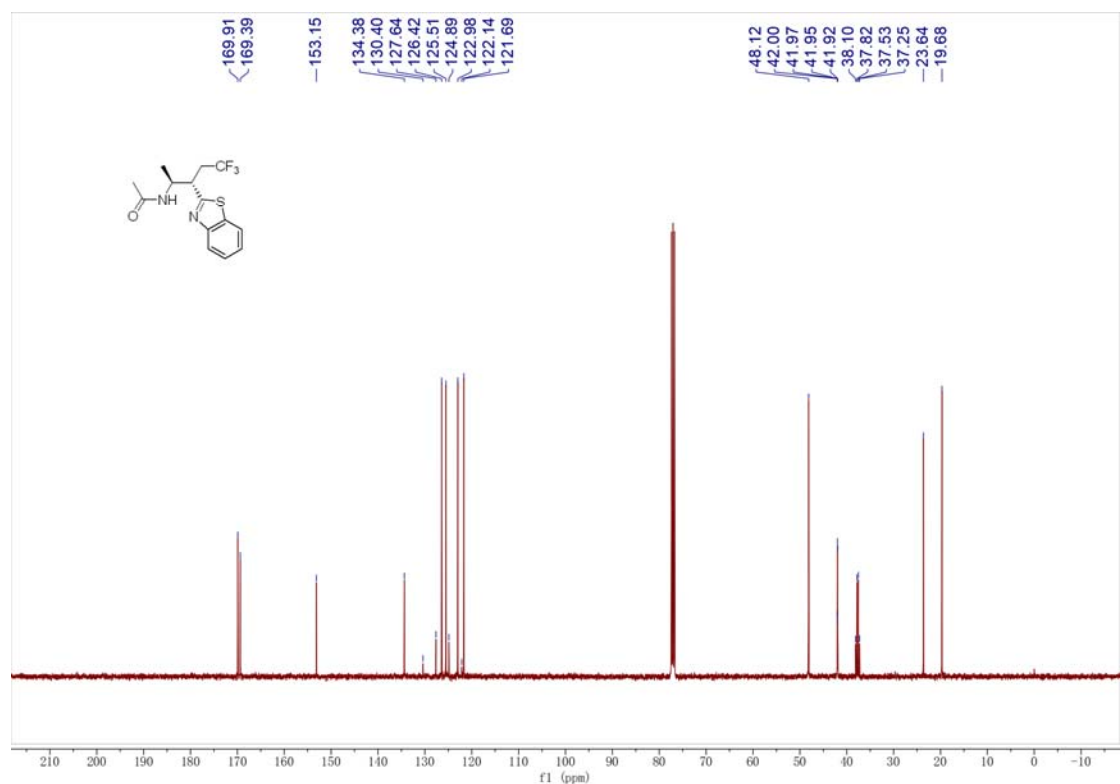

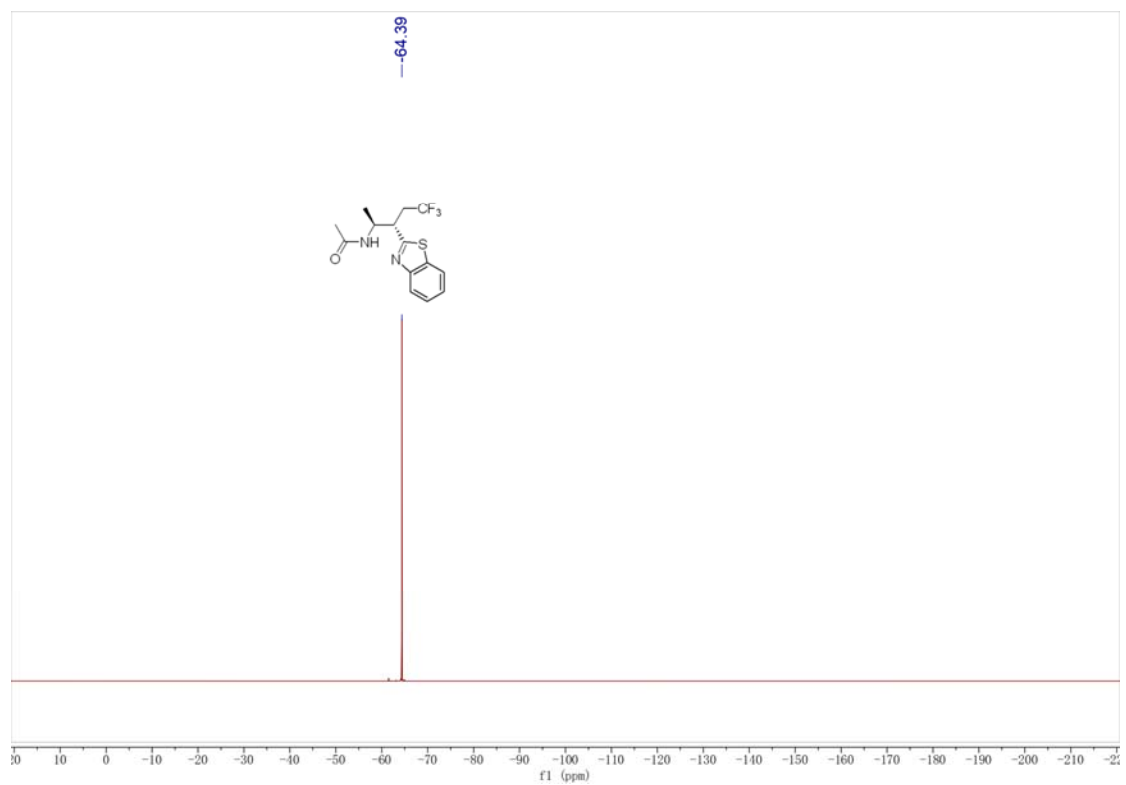

***N*-((2*S*,3*R*)-3-(benzo[d]thiazol-2-yl)-5,5,5-trifluoropentan-2-yl)acetamide (3v2)**

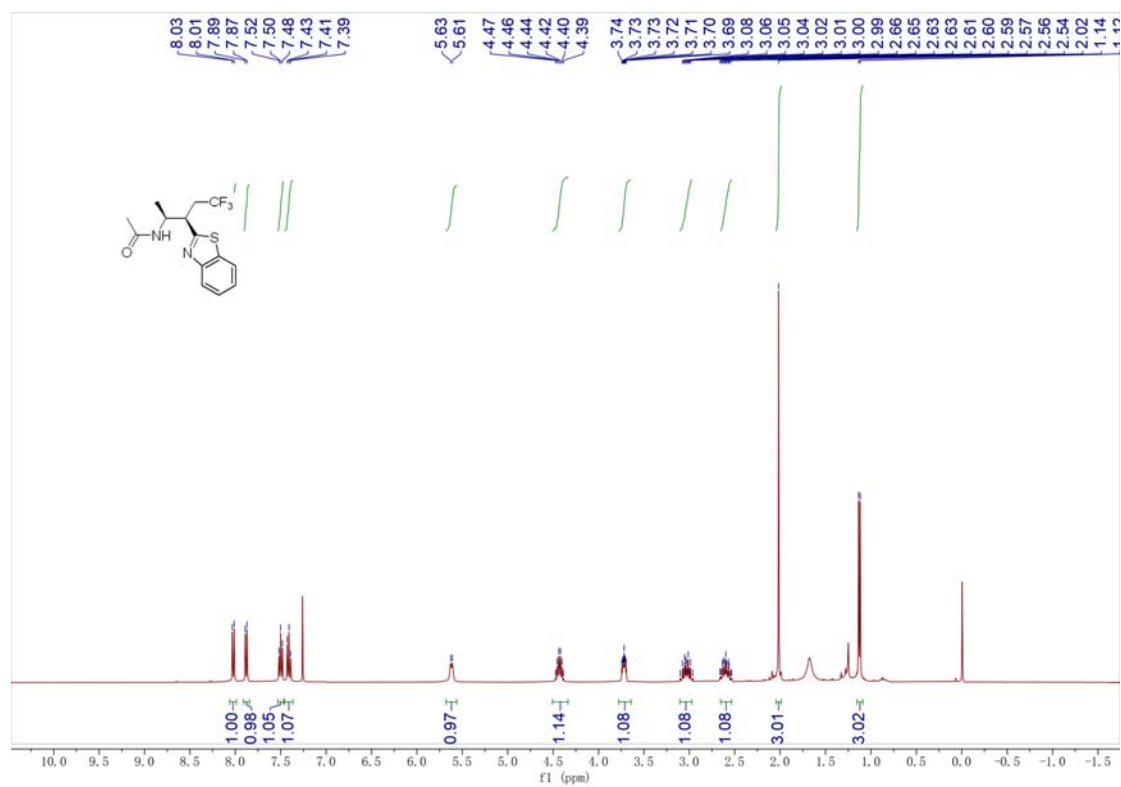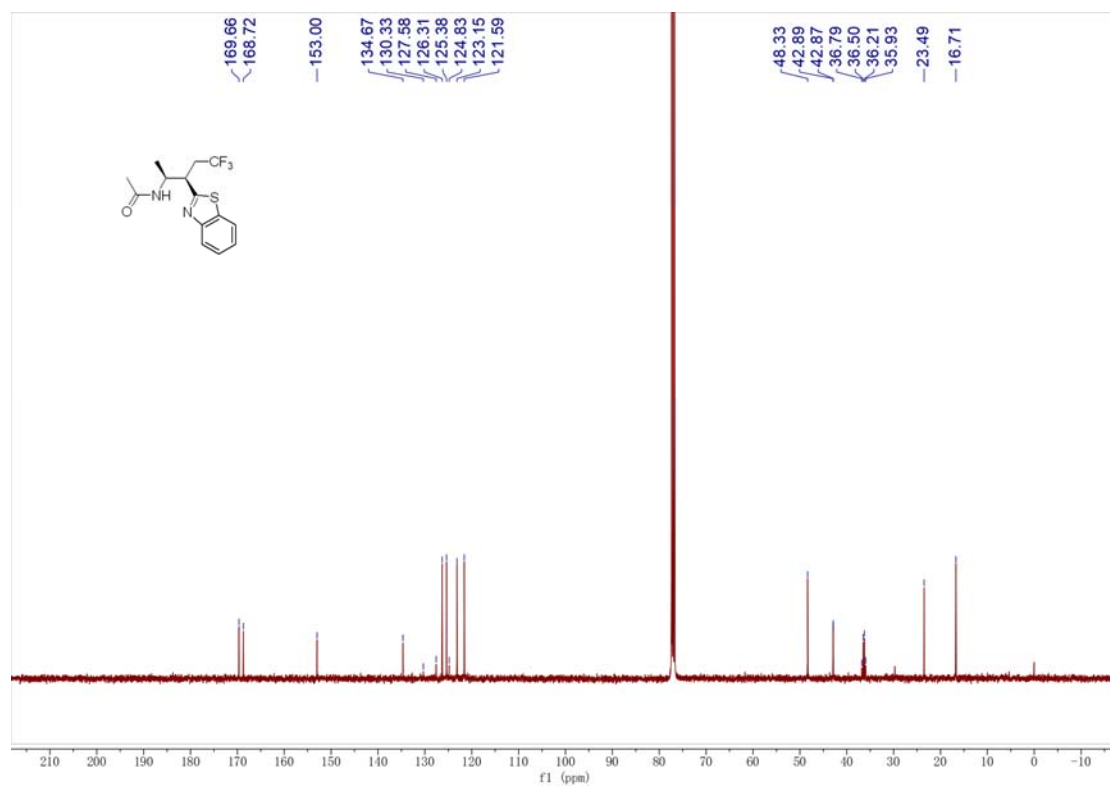

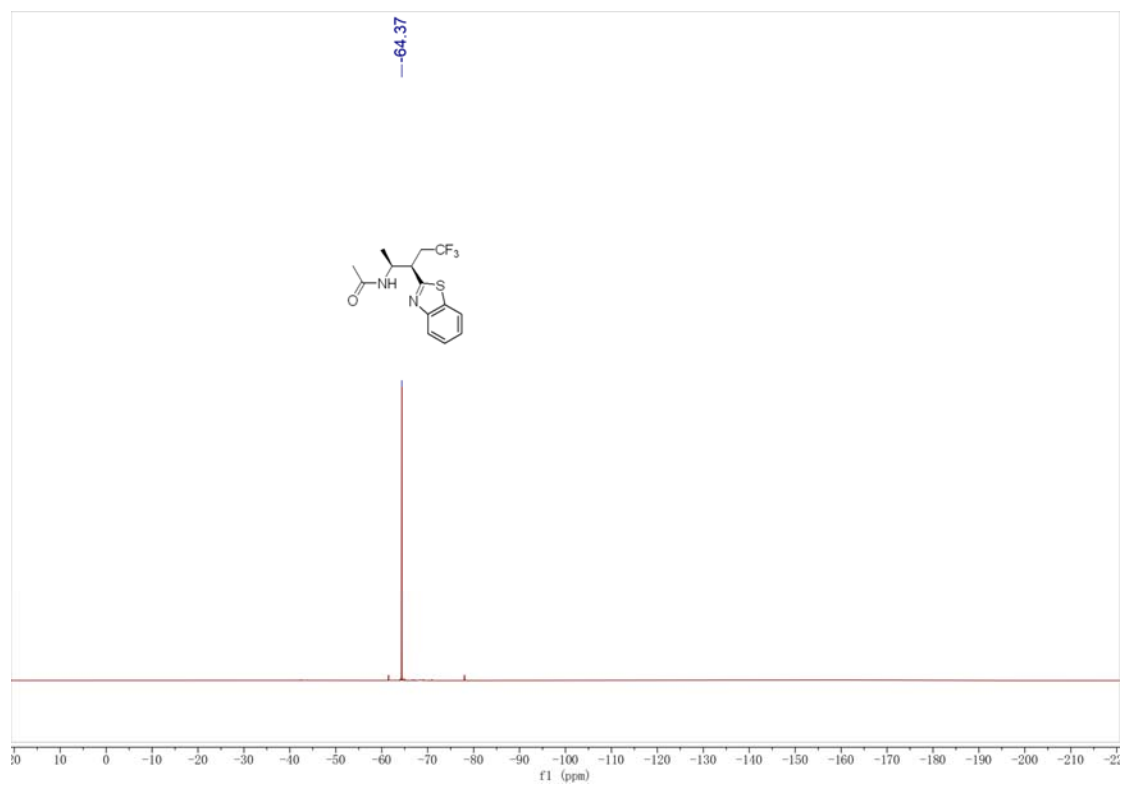



**Tert-butyl ((2R,3R)-3-(benzo[d]thiazol-2-yl)-5,5,5-trifluoropentan-2-yl)carbamate (3v')**

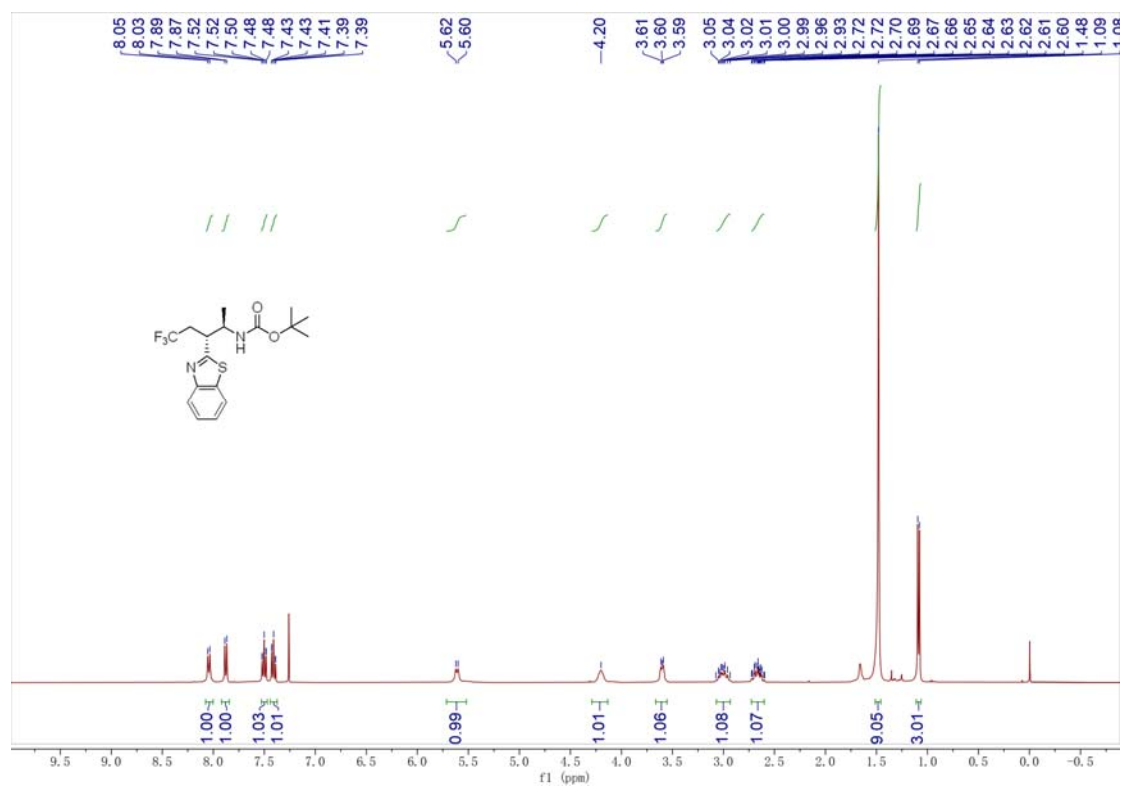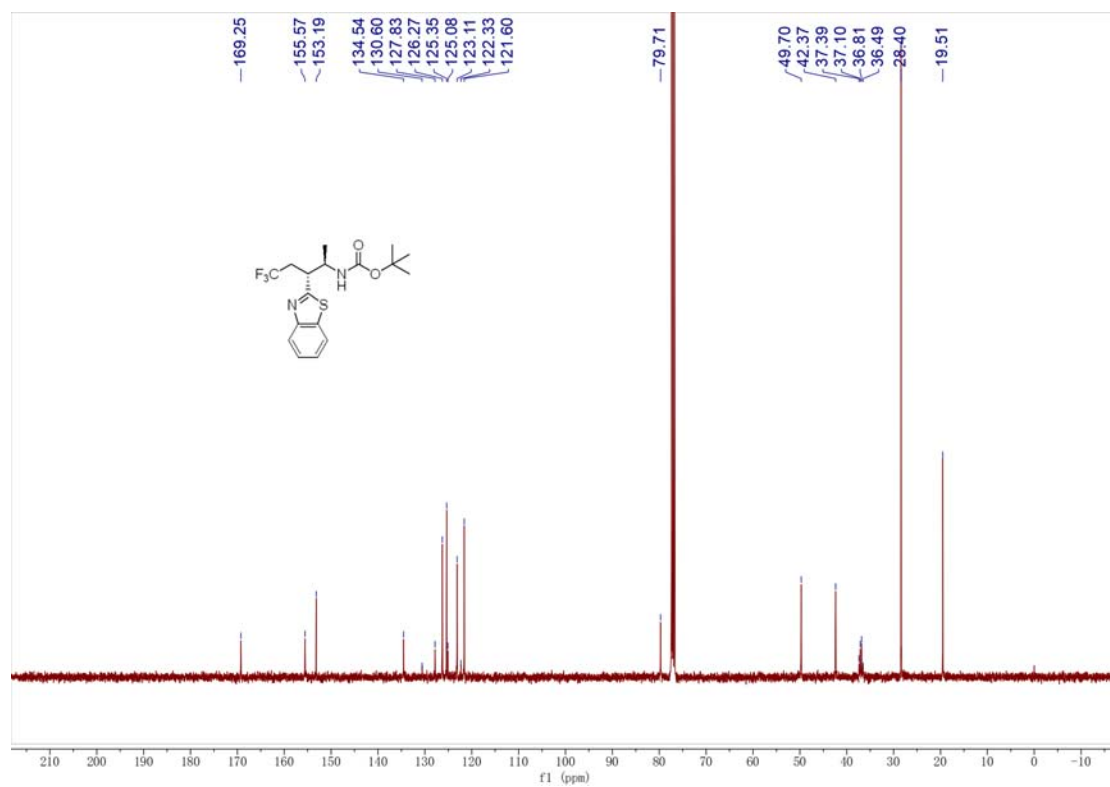

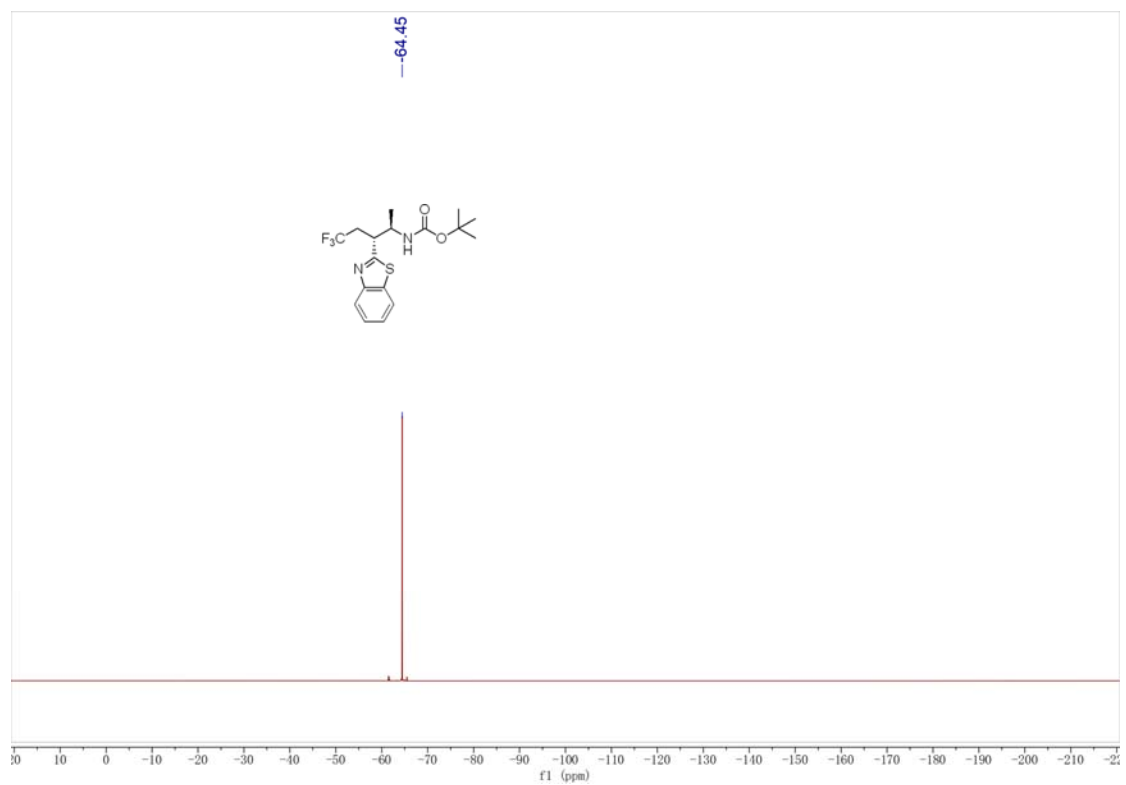

tert-butyl ((2R,3S)-3-(benzo[d]thiazol-2-yl)-5,5,5-trifluoropentan-2-yl)carbamate (3v'2)

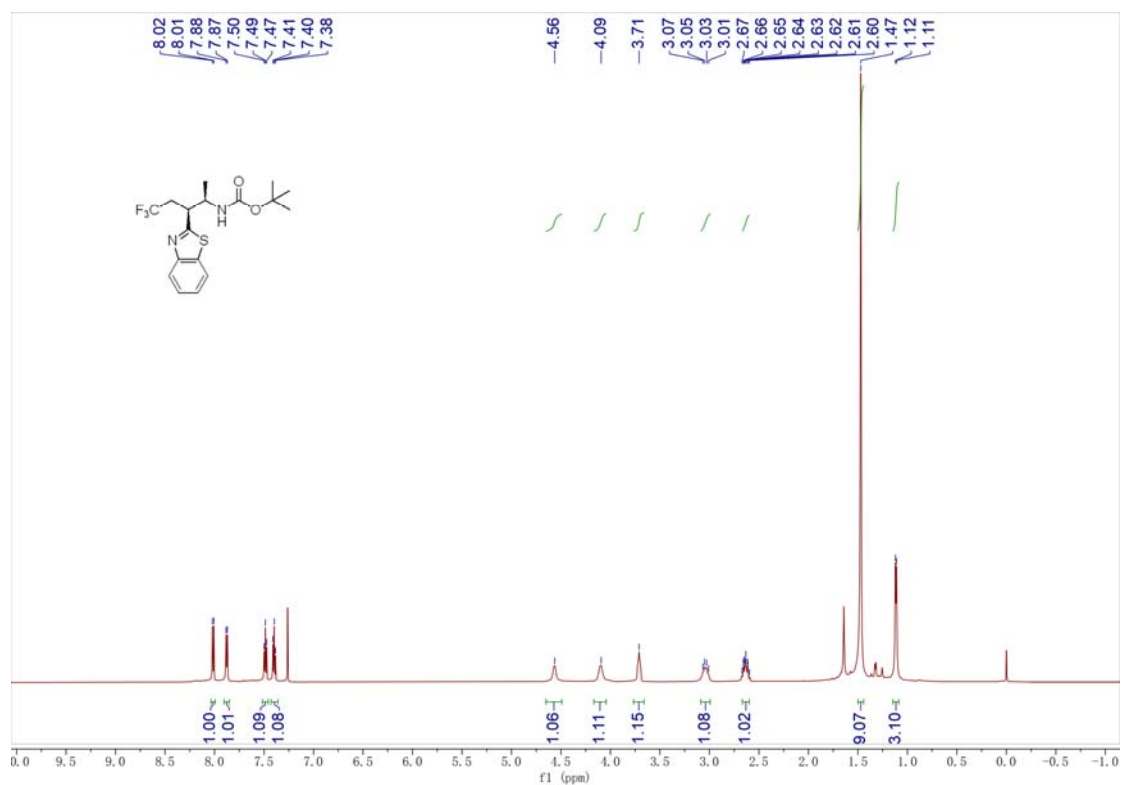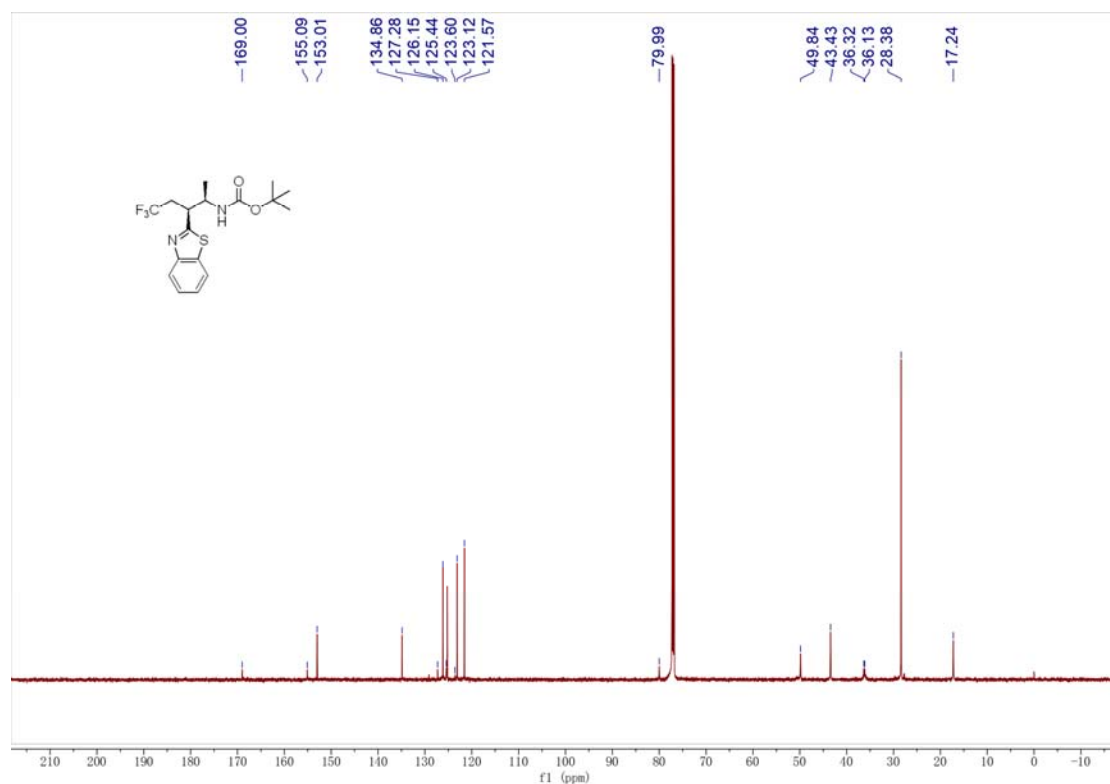

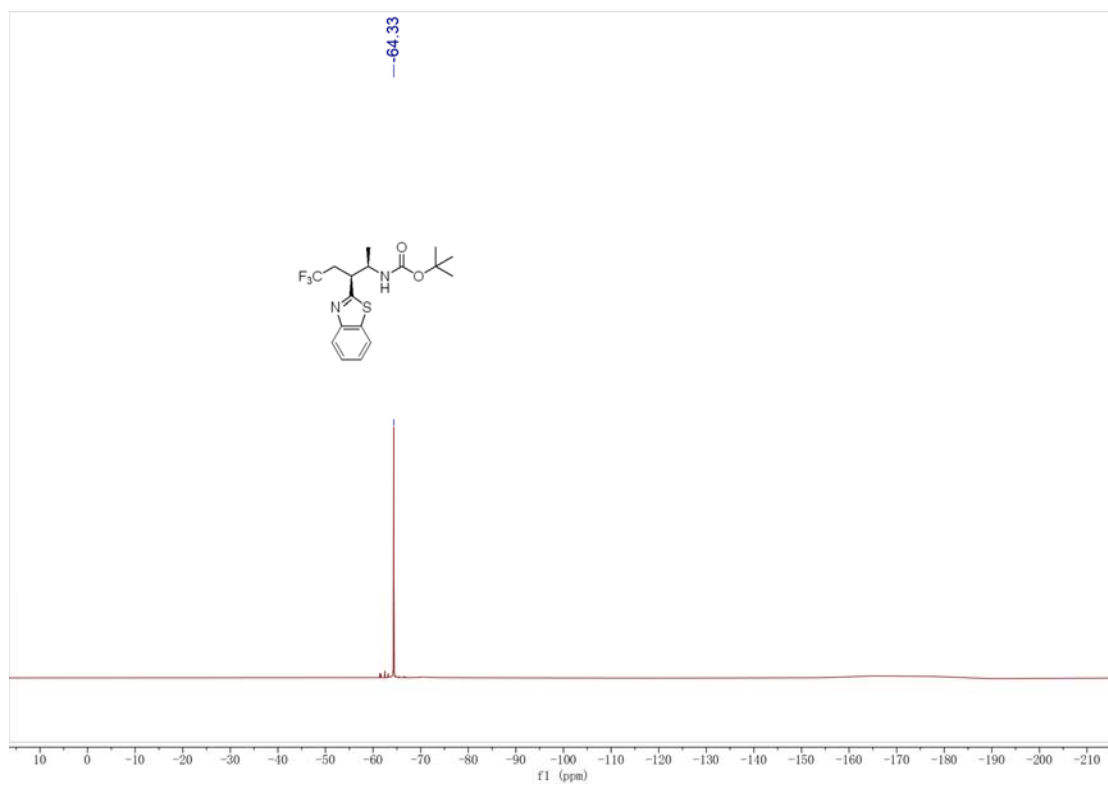

***N*-((2*S*,3*S*)-3-(benzo[*d*]thiazol-2-yl)-5,5,5-trifluoro-1-phenylpentan-2-yl)acetamide (3w)**

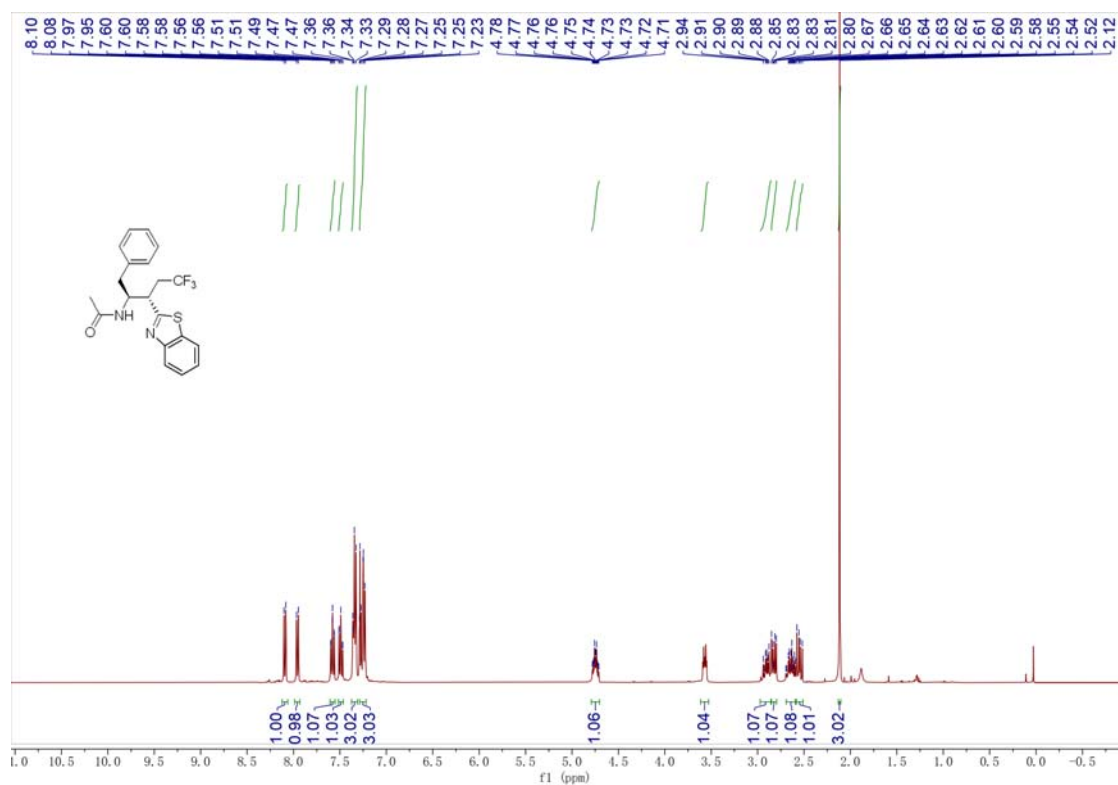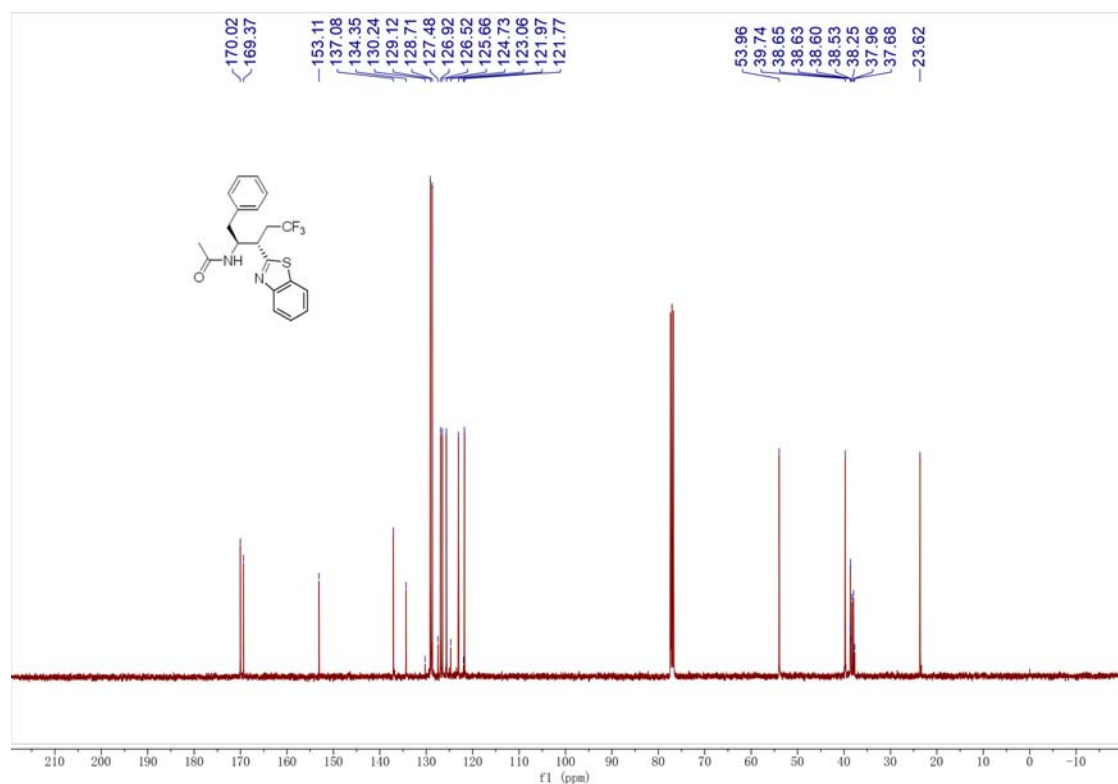

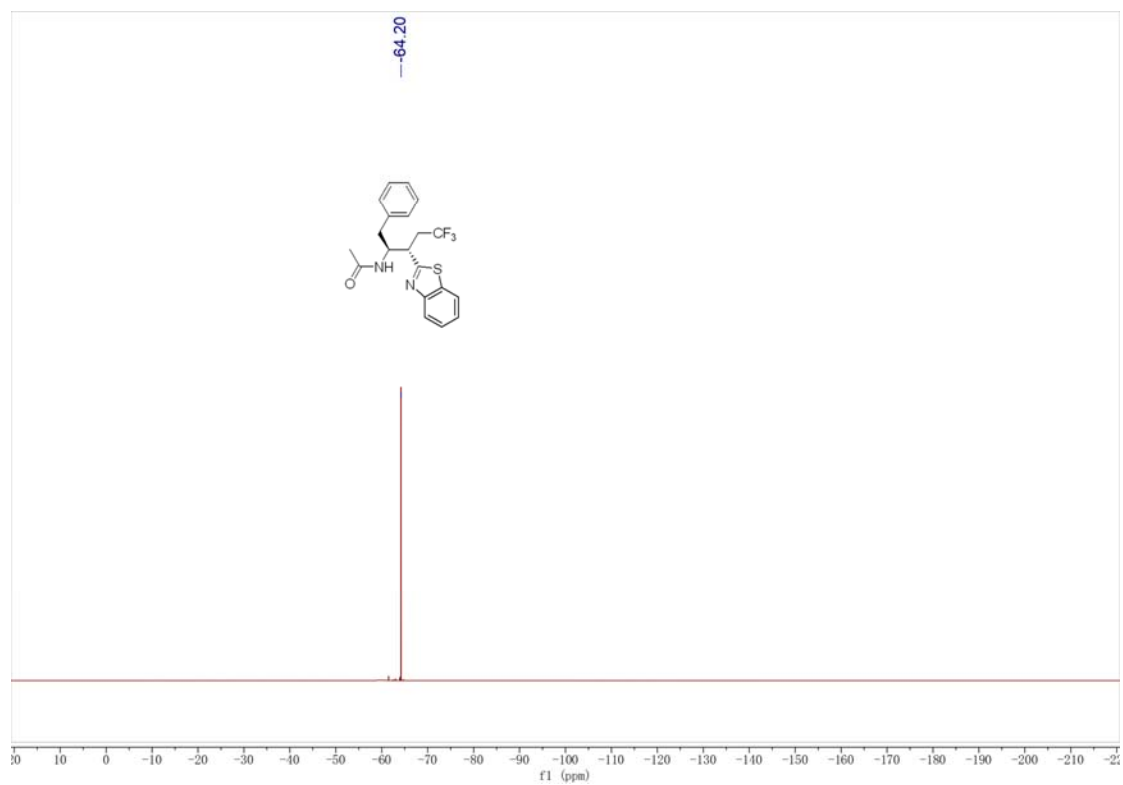

***N*-((1*S*,2*R*)-2-(benzo[*d*]thiazol-2-yl)-4,4,4-trifluoro-1-phenylbutyl)acetamide (3x)**

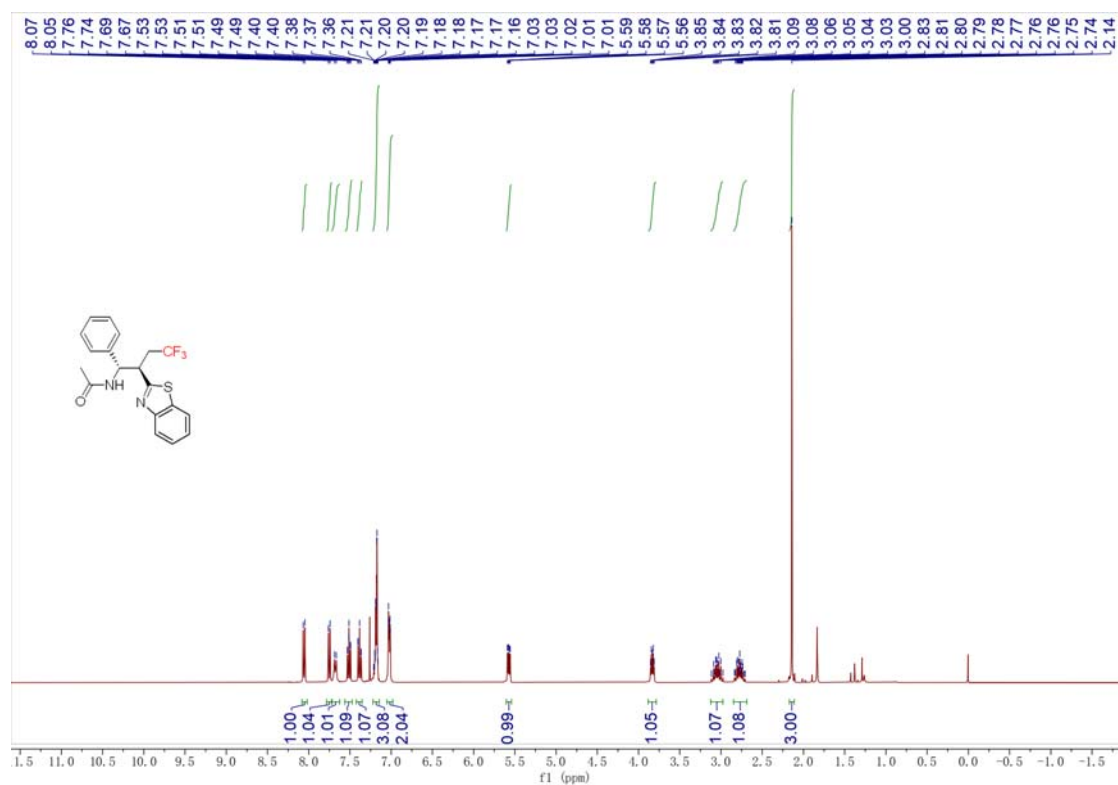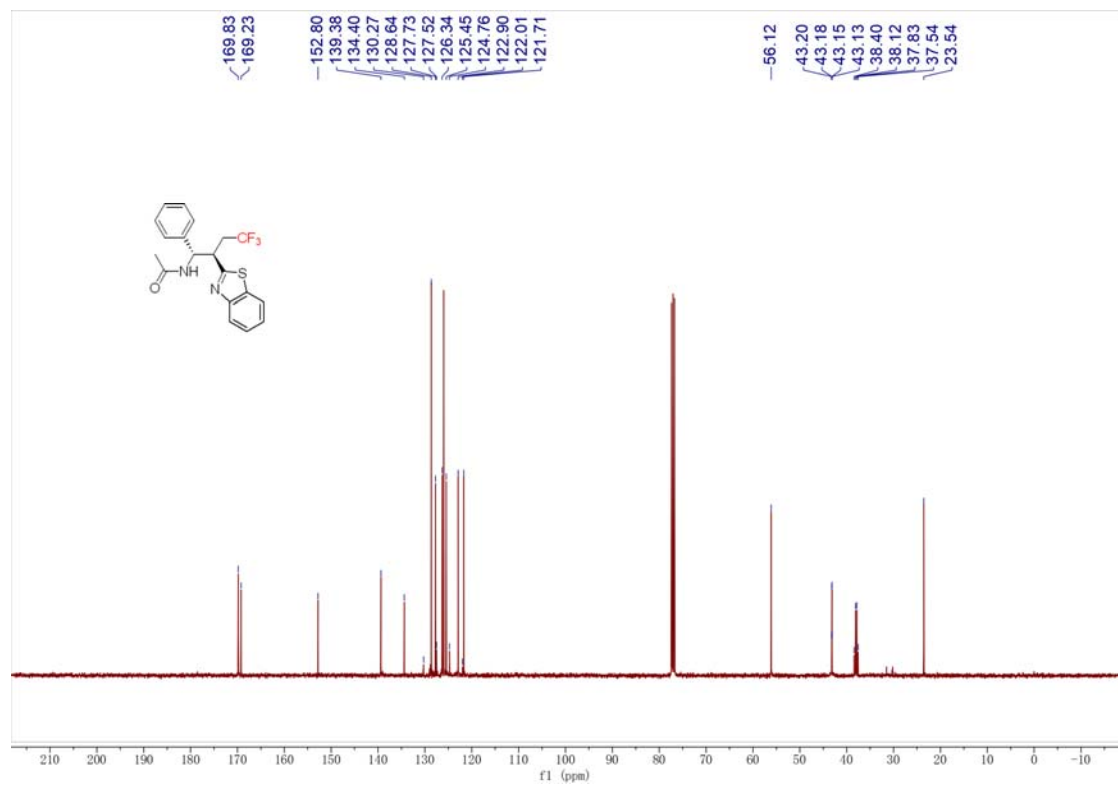

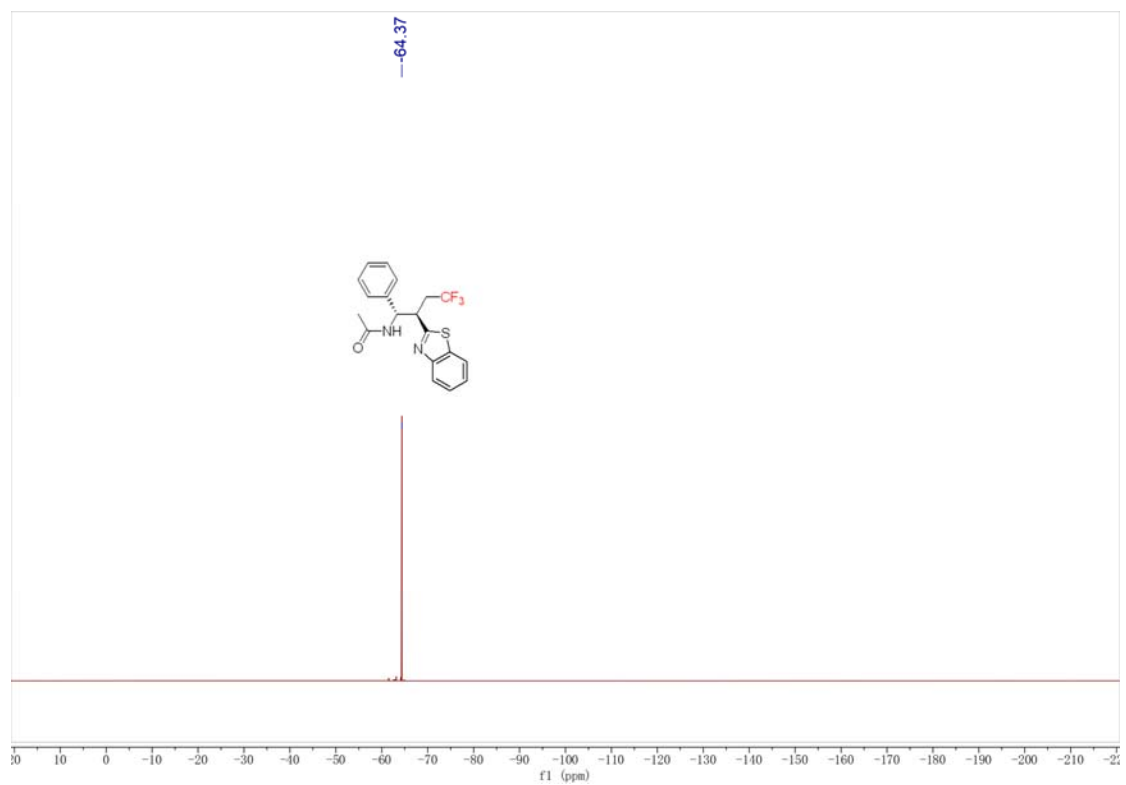



tert-butyl methyl(2-oxo-2-((4,4,4-trifluoro-2-(thiazol-2-yl)butyl)amino)ethyl)carbamate (3y)

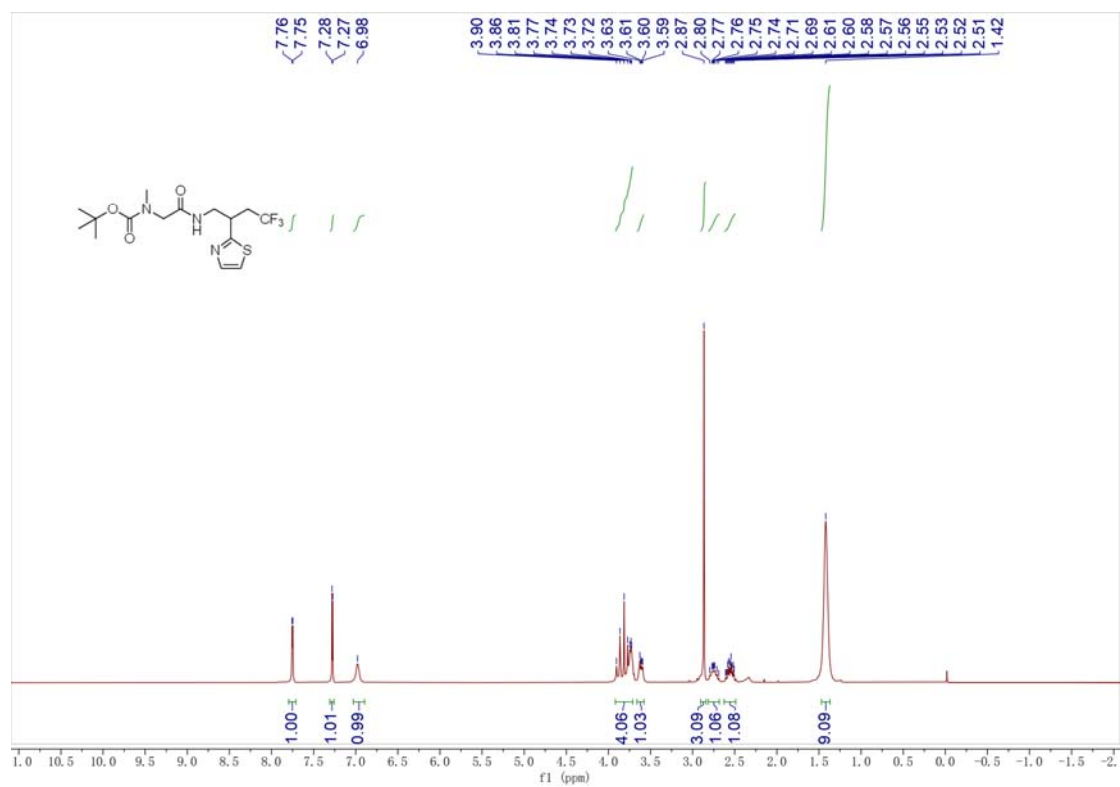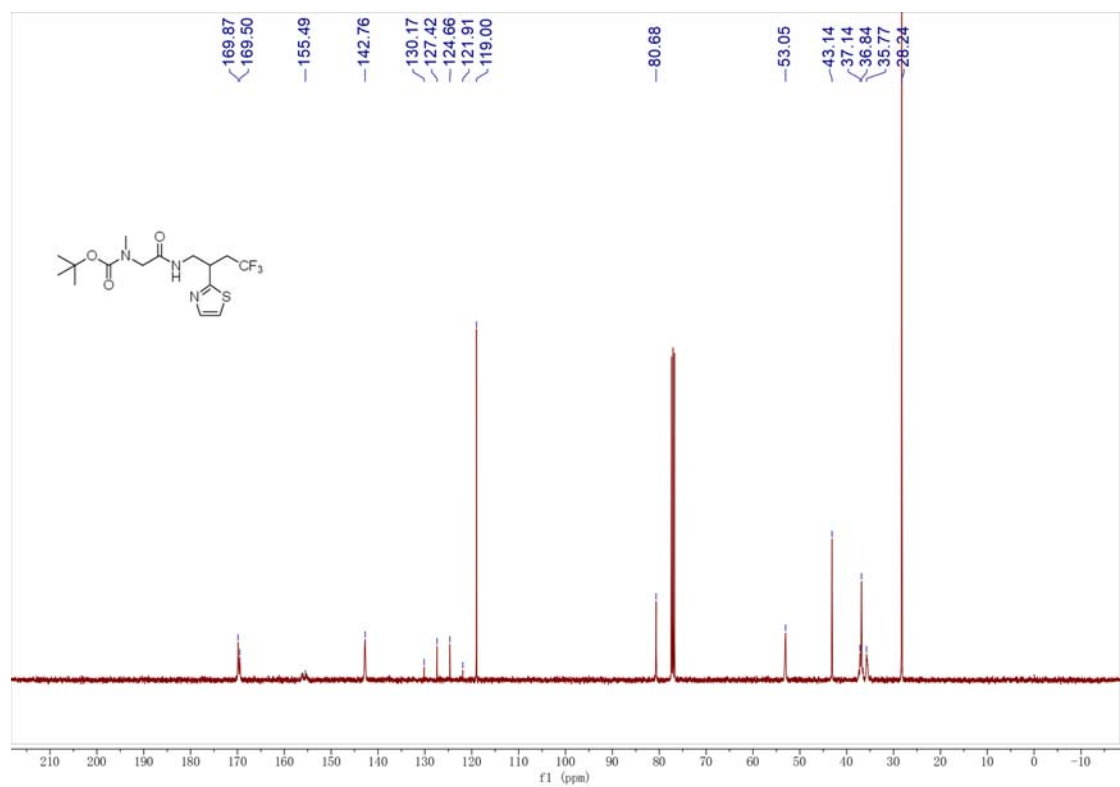

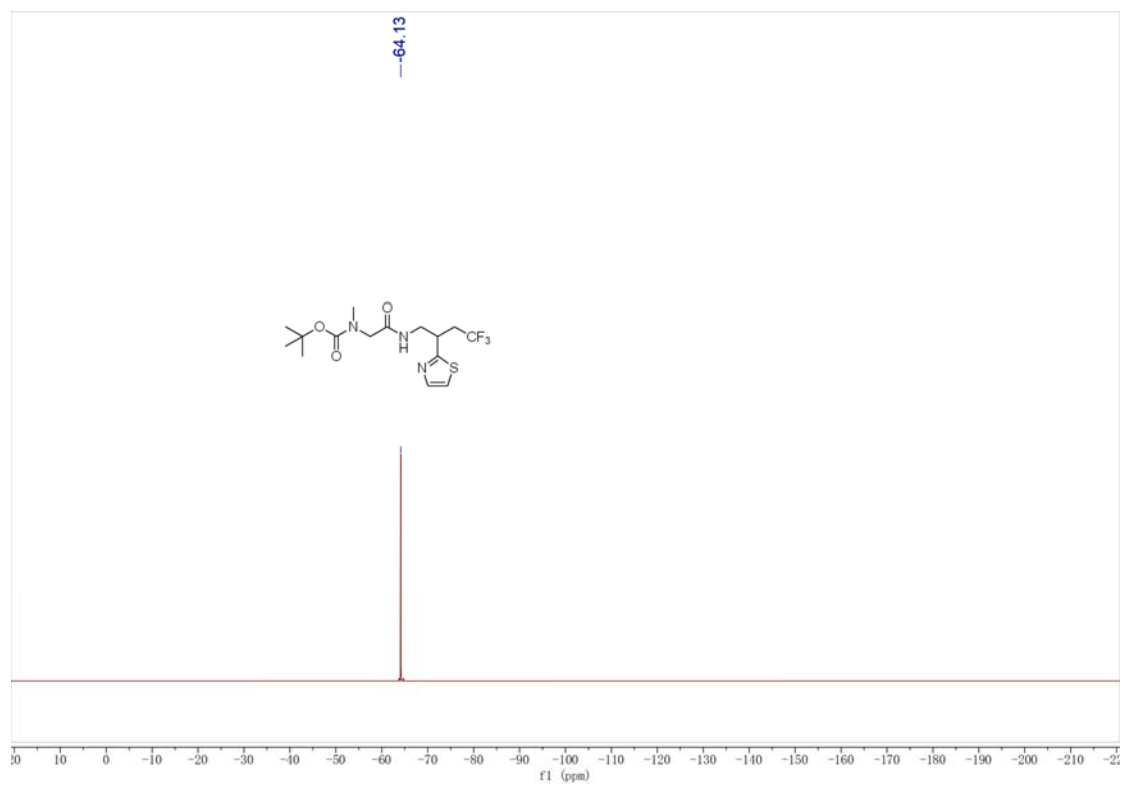

***N*-2-(5-chlorothiophen-2-yl)-4,4,4-trifluorobutyl)-2-(1,3-dioxisoindolin-2-yl)propenamide  
(3z)**

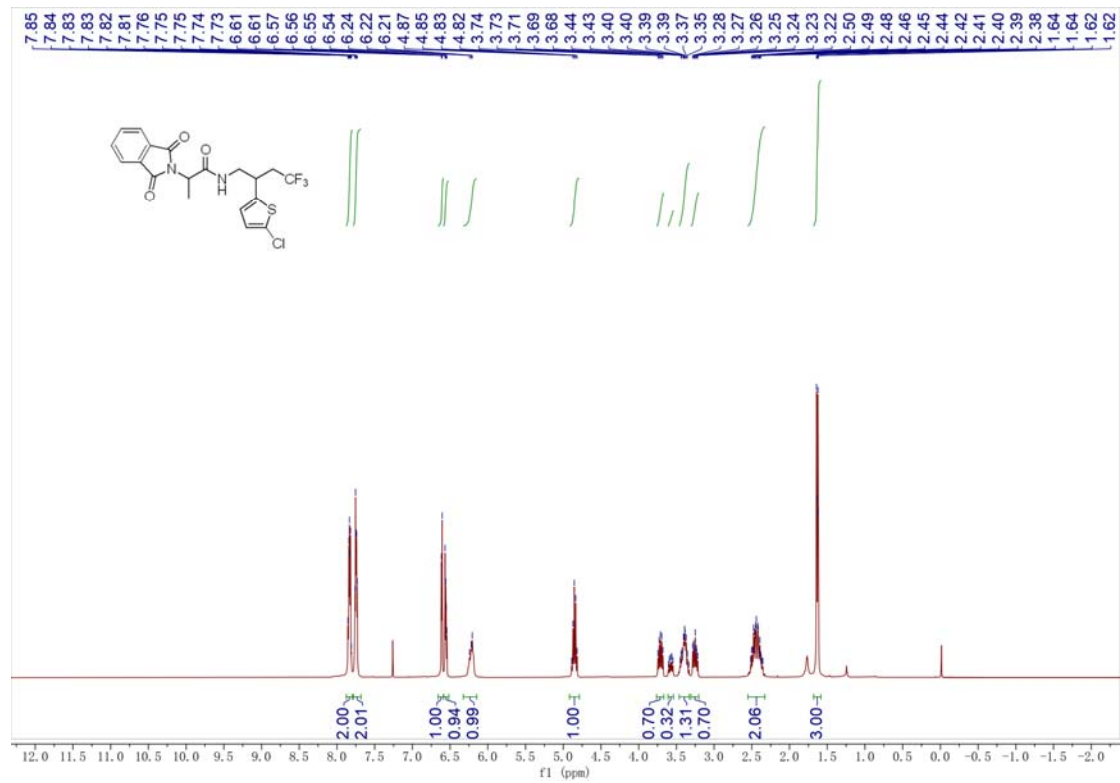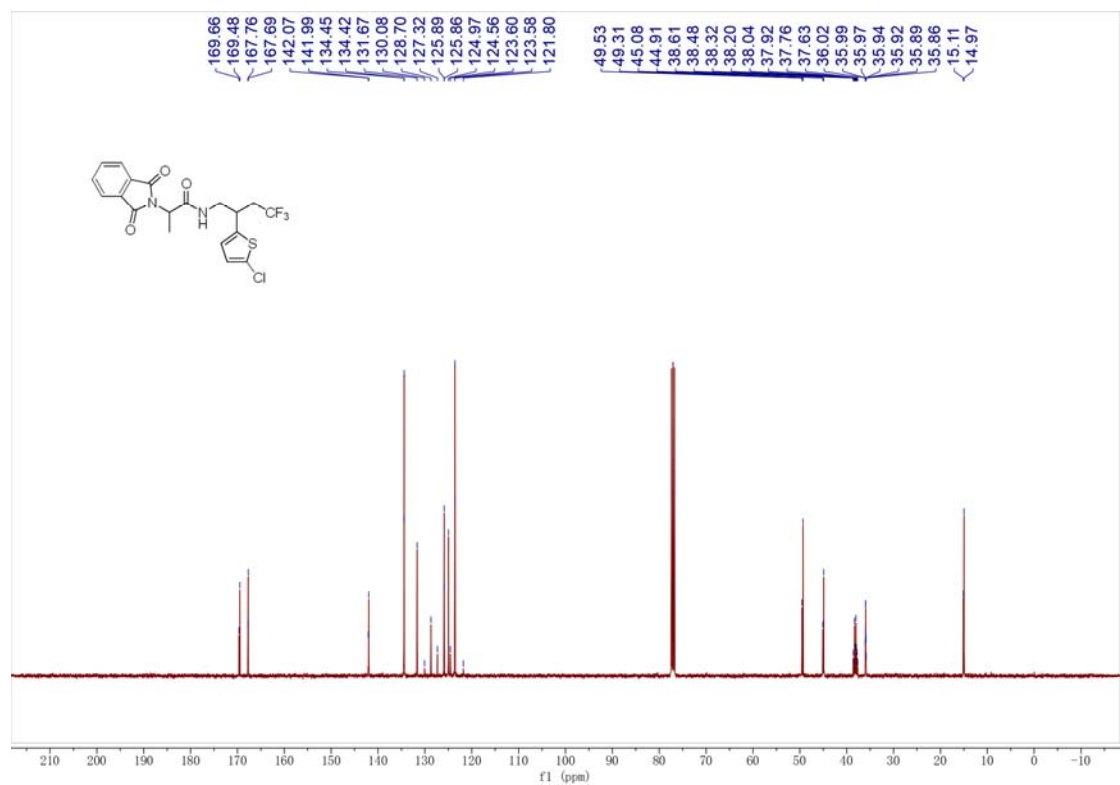

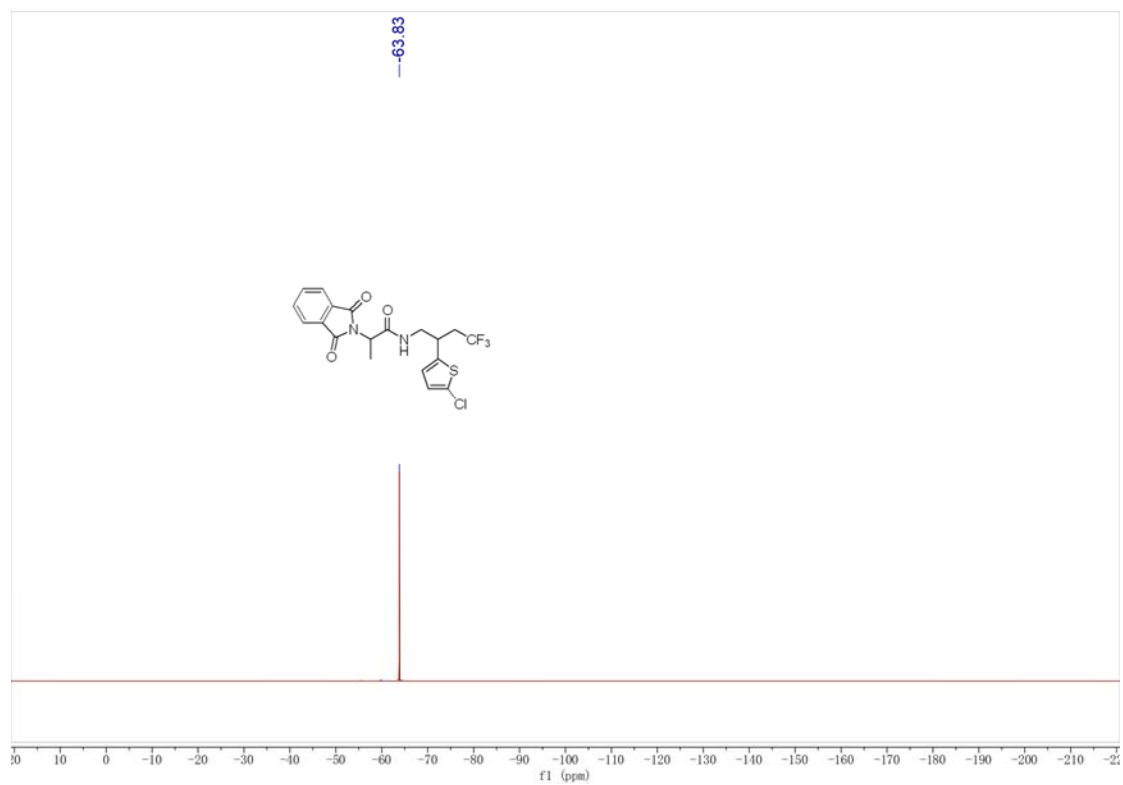

tert-butyl methyl(3-oxo-3-((4,4,4-trifluoro-2-(thiazol-2-yl)butyl)amino)propyl)carbamate  
(3z1)

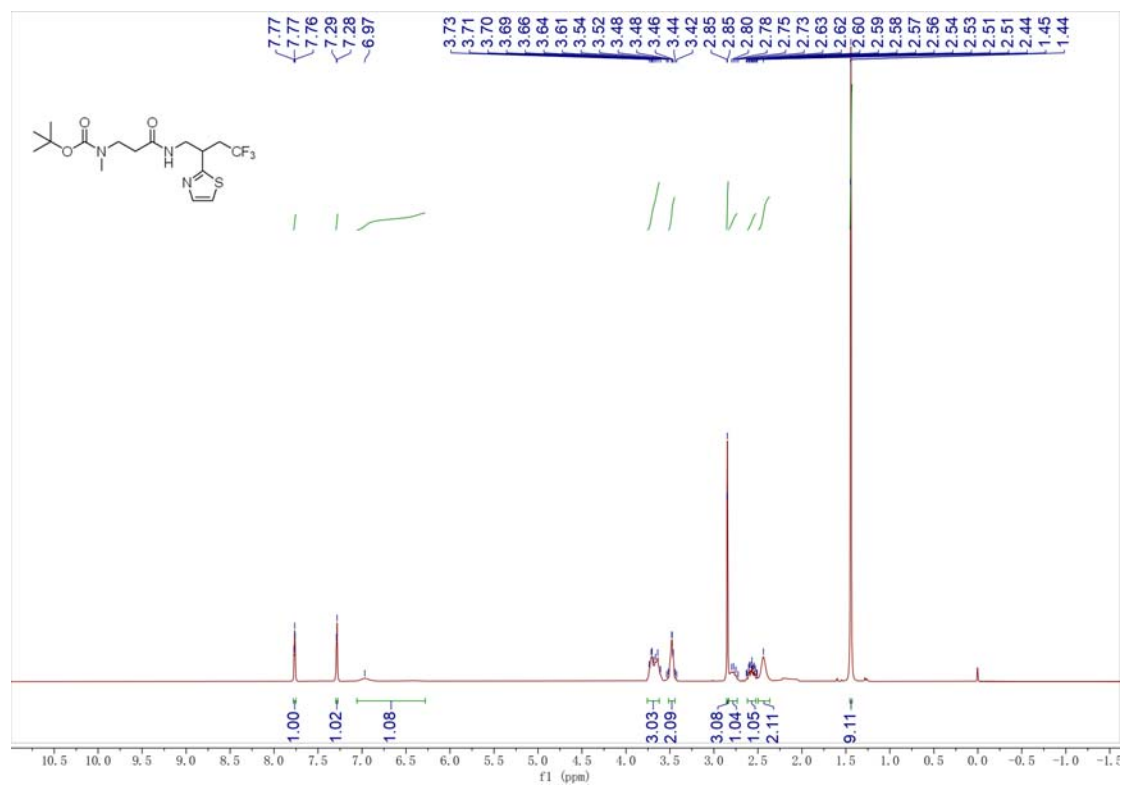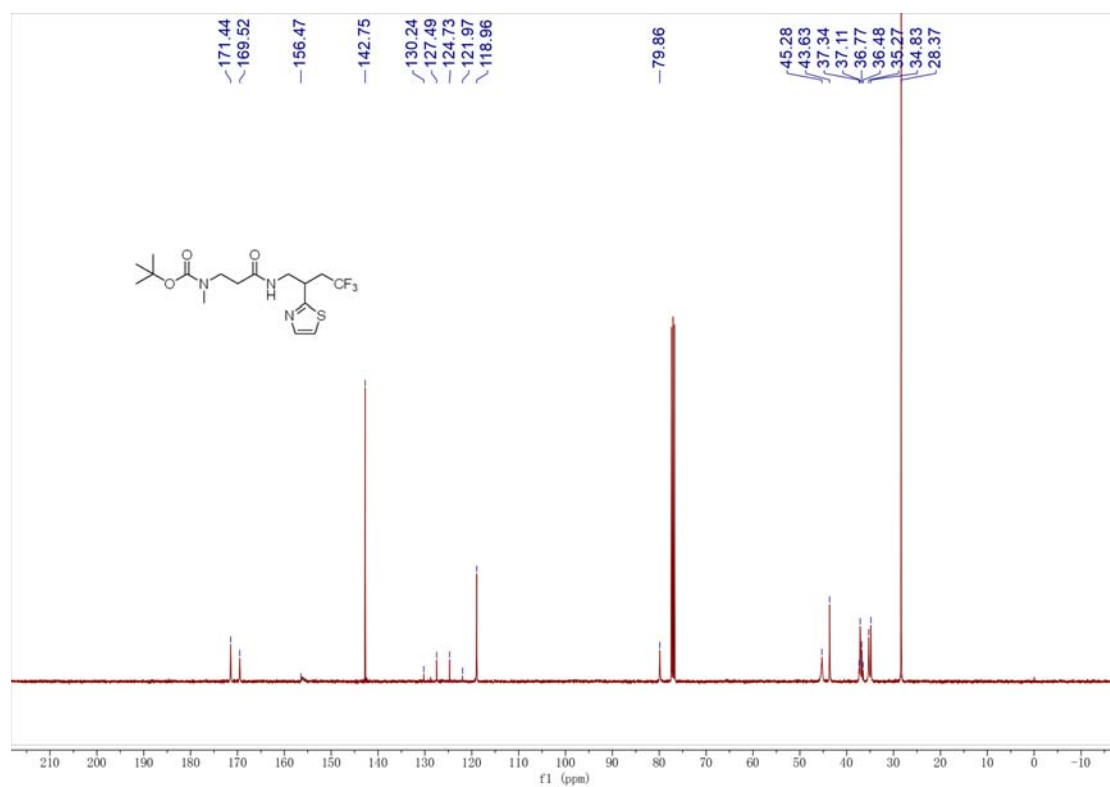

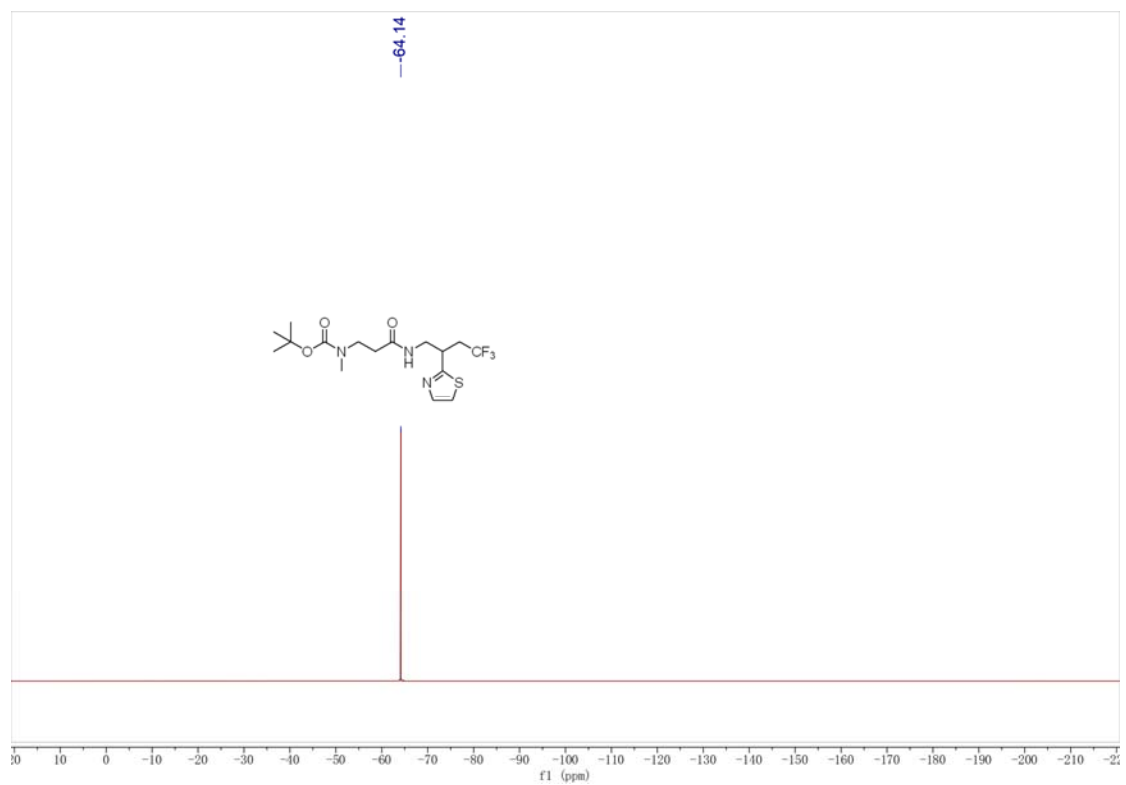

benzyl 3-((2-(benzo[d]thiazol-2-yl)-4,4,4-trifluorobutyl)carbamoyl)azetidine-1-carboxylate  
(3z2)

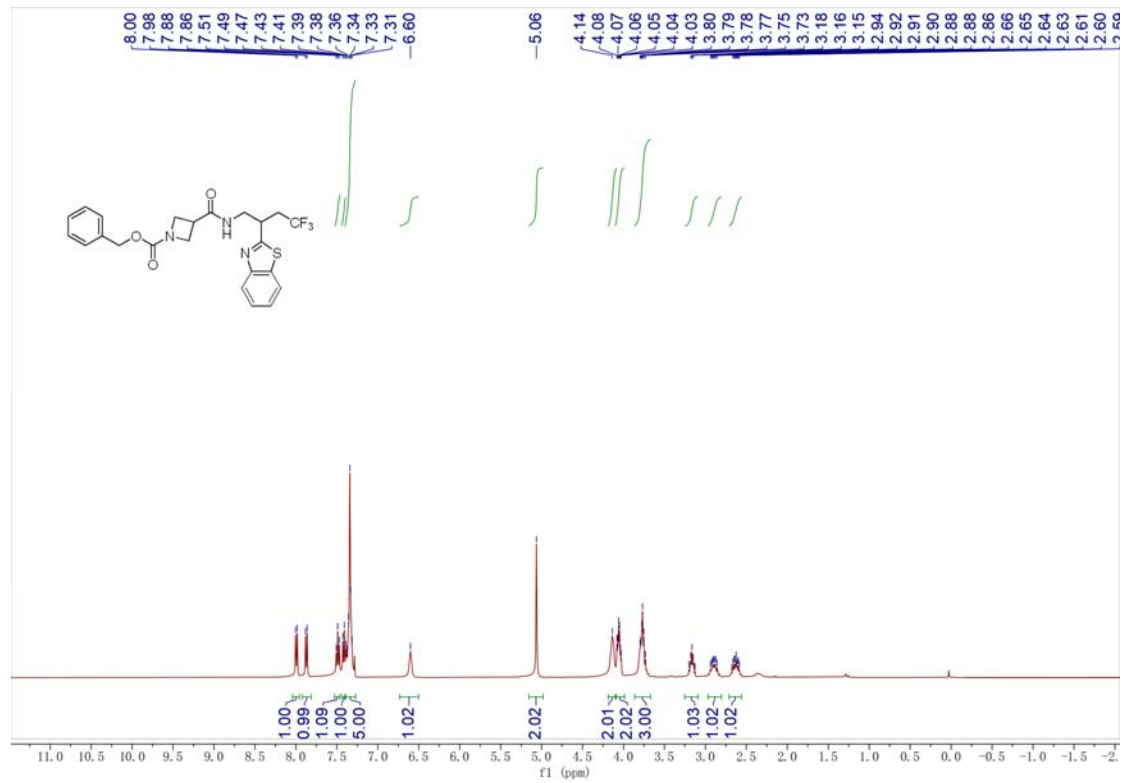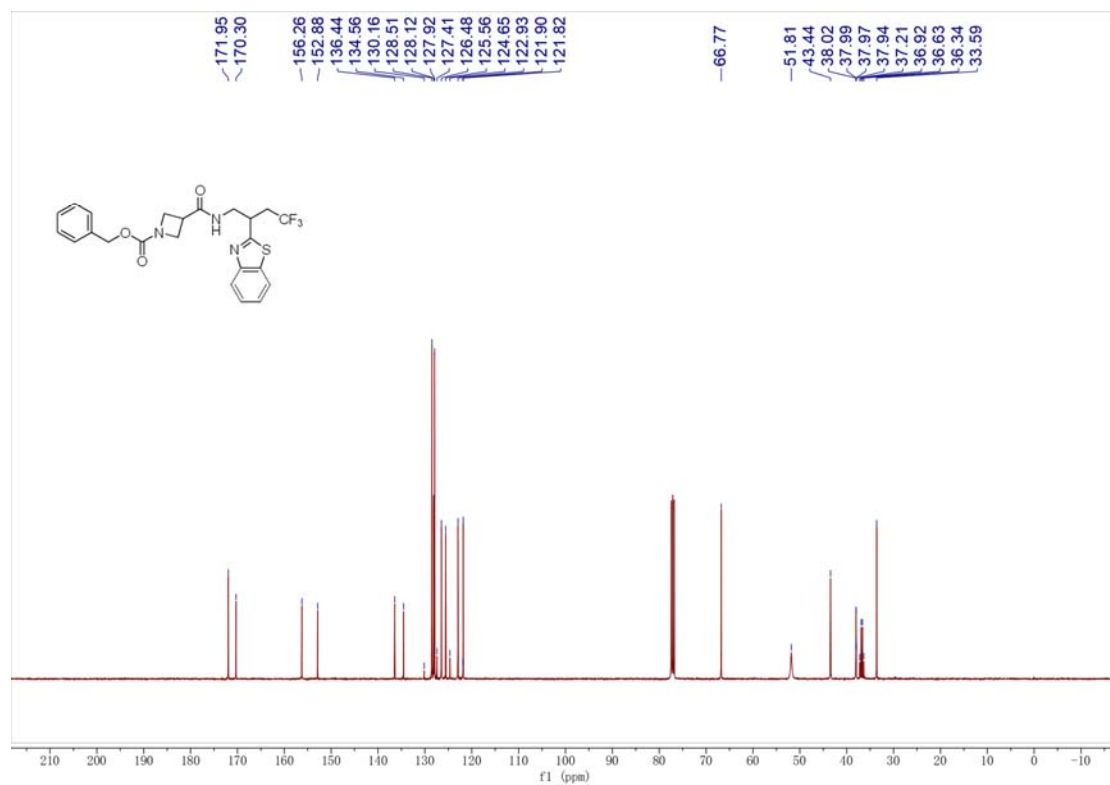

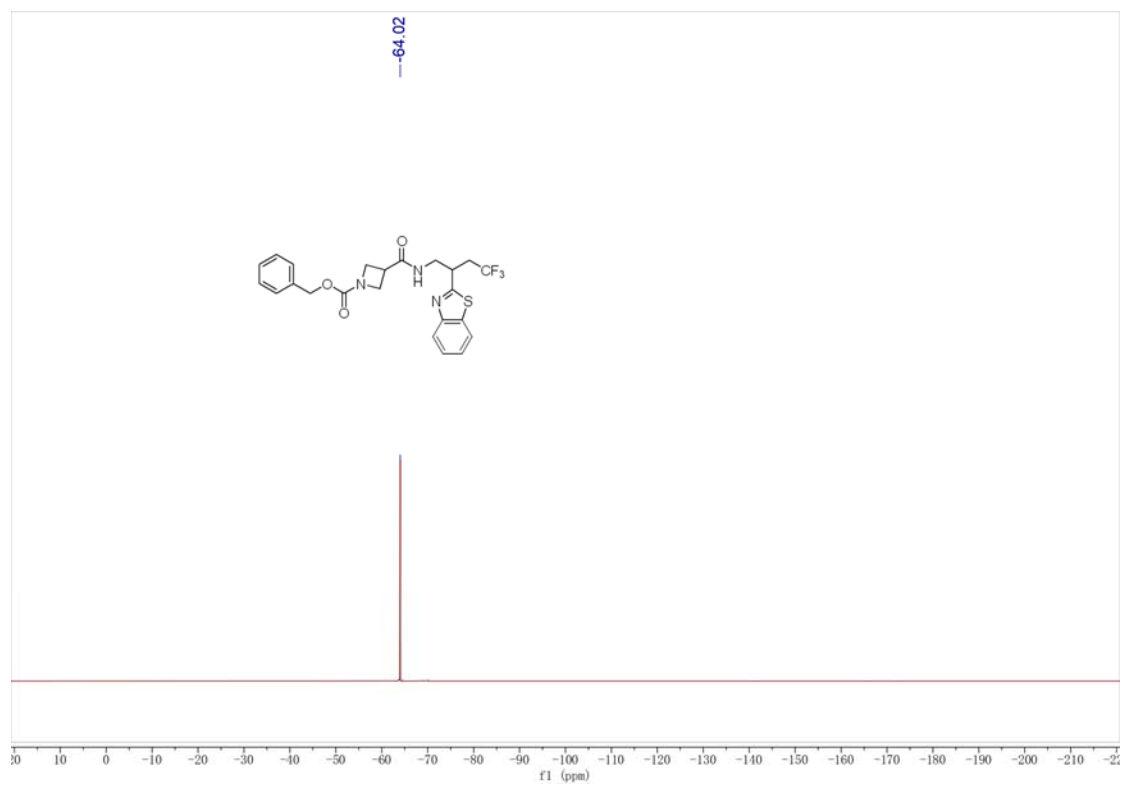



benzyl methyl(4-oxo-4-((4,4,4-trifluoro-2-(thiazol-2-yl)butyl)amino)butyl)carbamate (3z3)

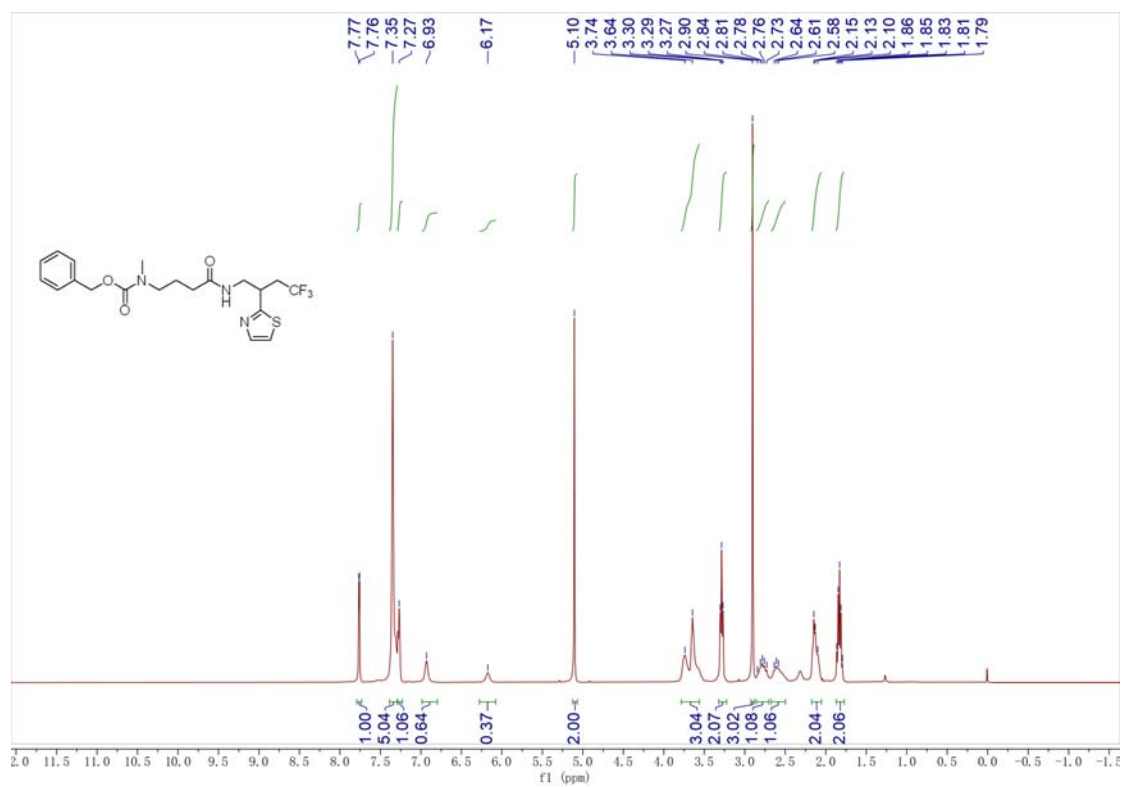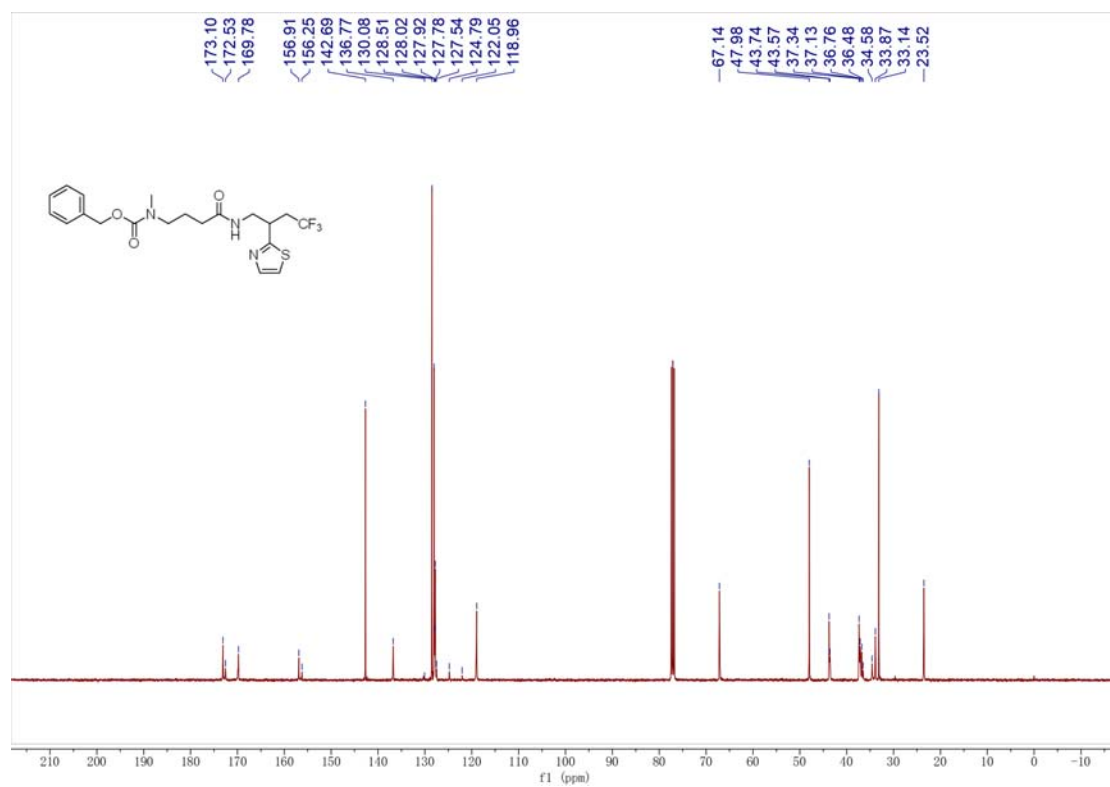



***N*-[2-(5-chlorothiophen-2-yl)-4,4,4-trifluorobutyl]-4-oxopentanamide (3z4)**

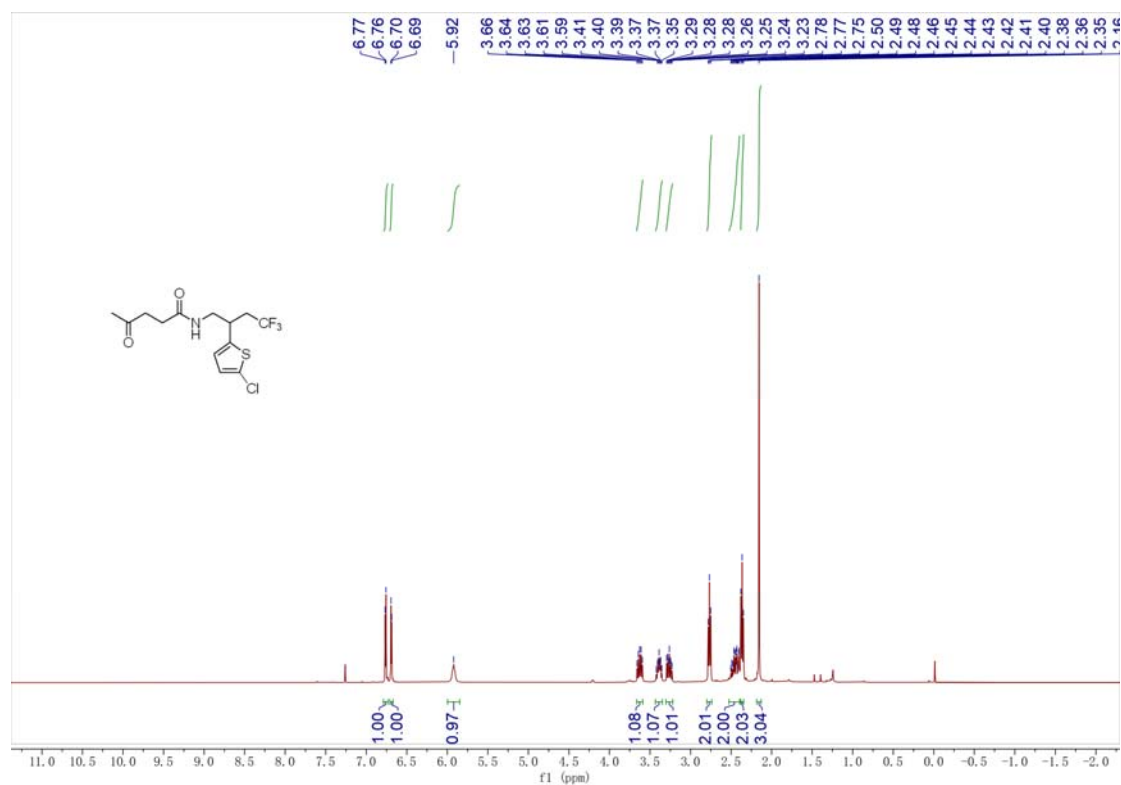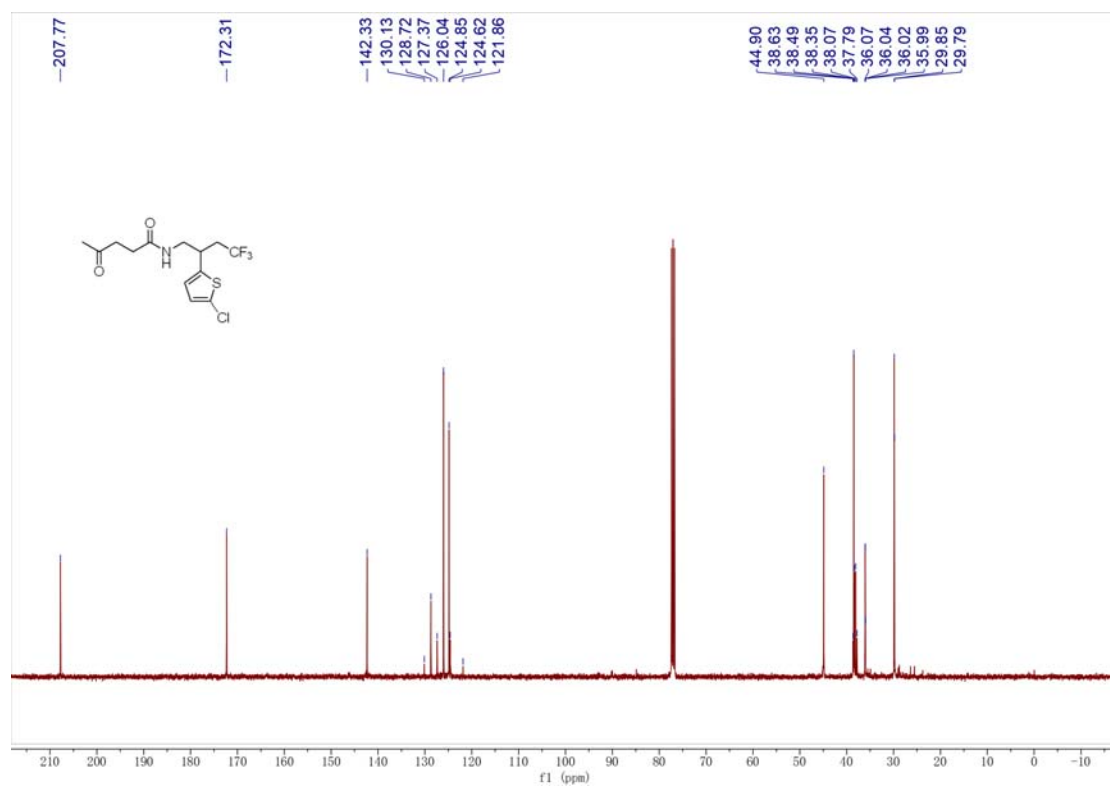

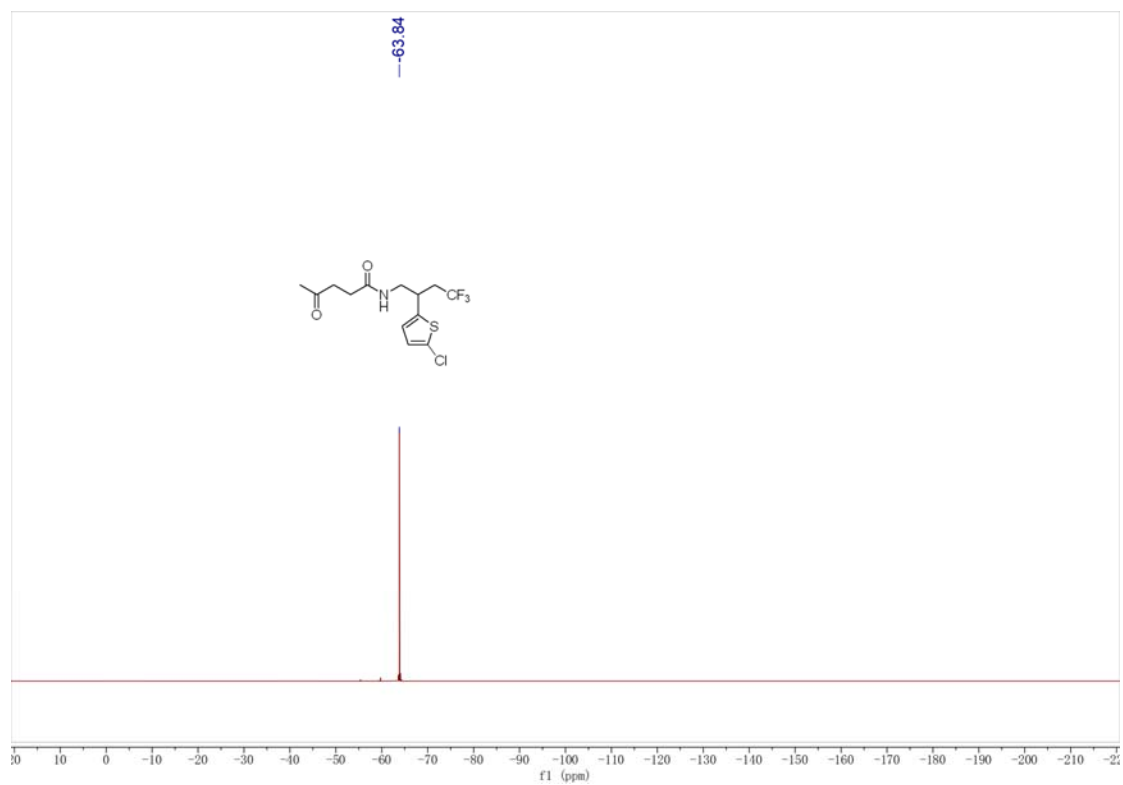

4-([1,1'-biphenyl]-4-yl)-4-oxo-N-(4,4,4-trifluoro-2-(thiazol-2-yl)butyl)butanamide (3z5)

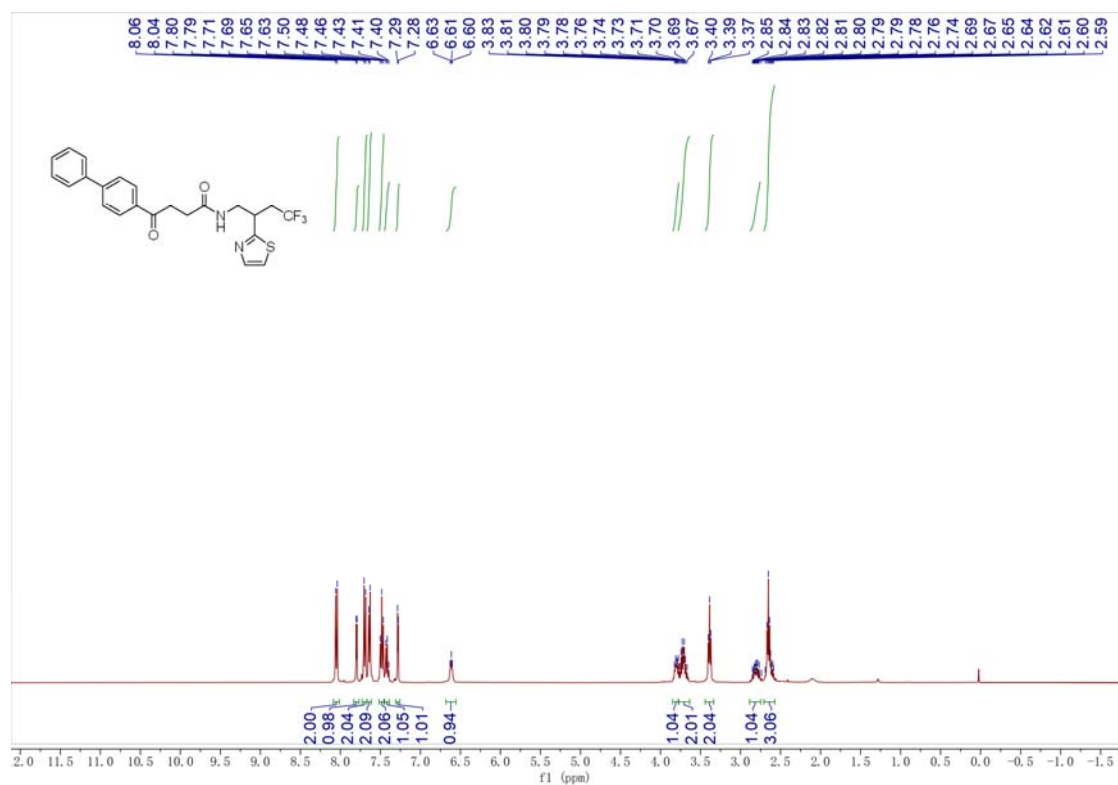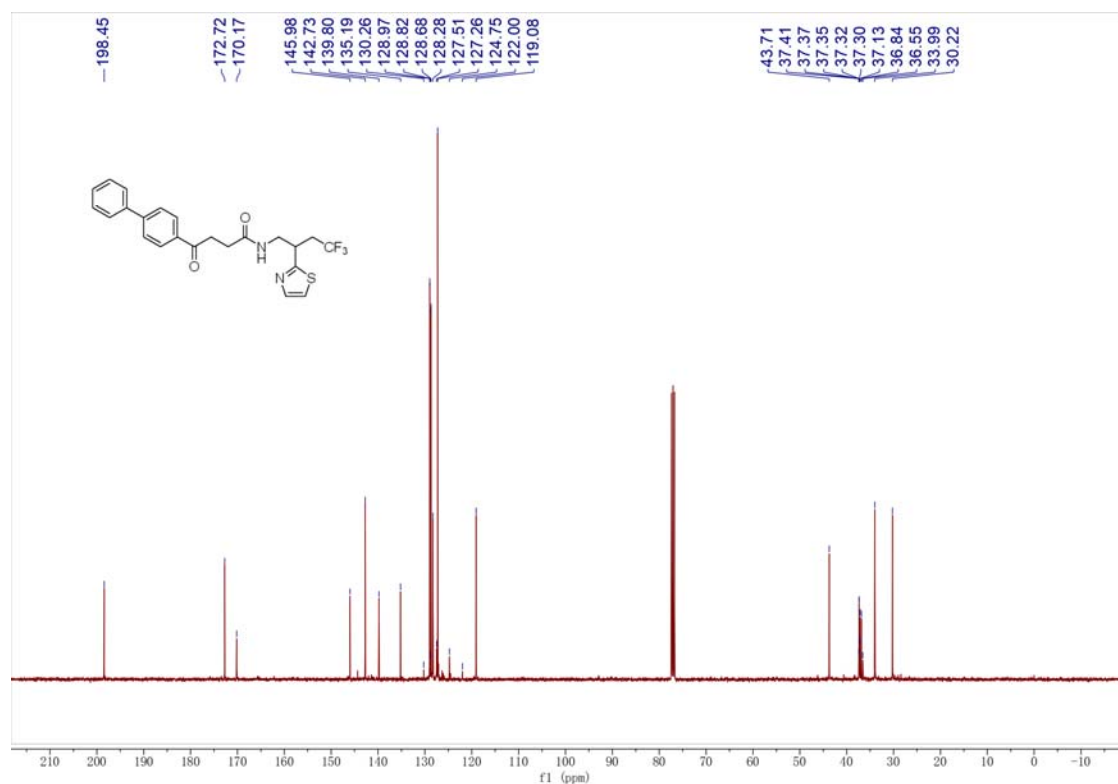

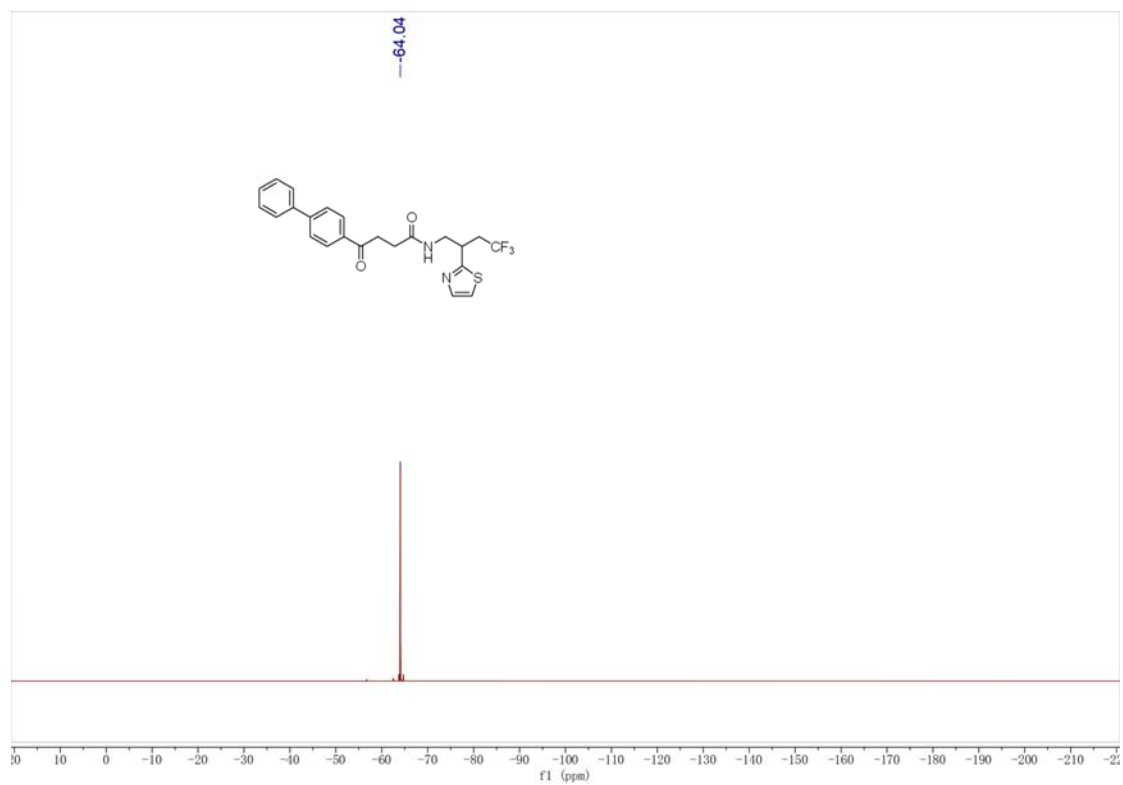

**(4R)-4-((5S,8R,9S,10S,13R,14S,17R)-10,13-dimethyl-3,7,12-trioxohexadecahydro-1H-cyclopenta[a]phenanthren-17-yl)-N-(4,4,4-trifluoro-2-(thiazol-2-yl)butyl)pentanamide (3z6)**

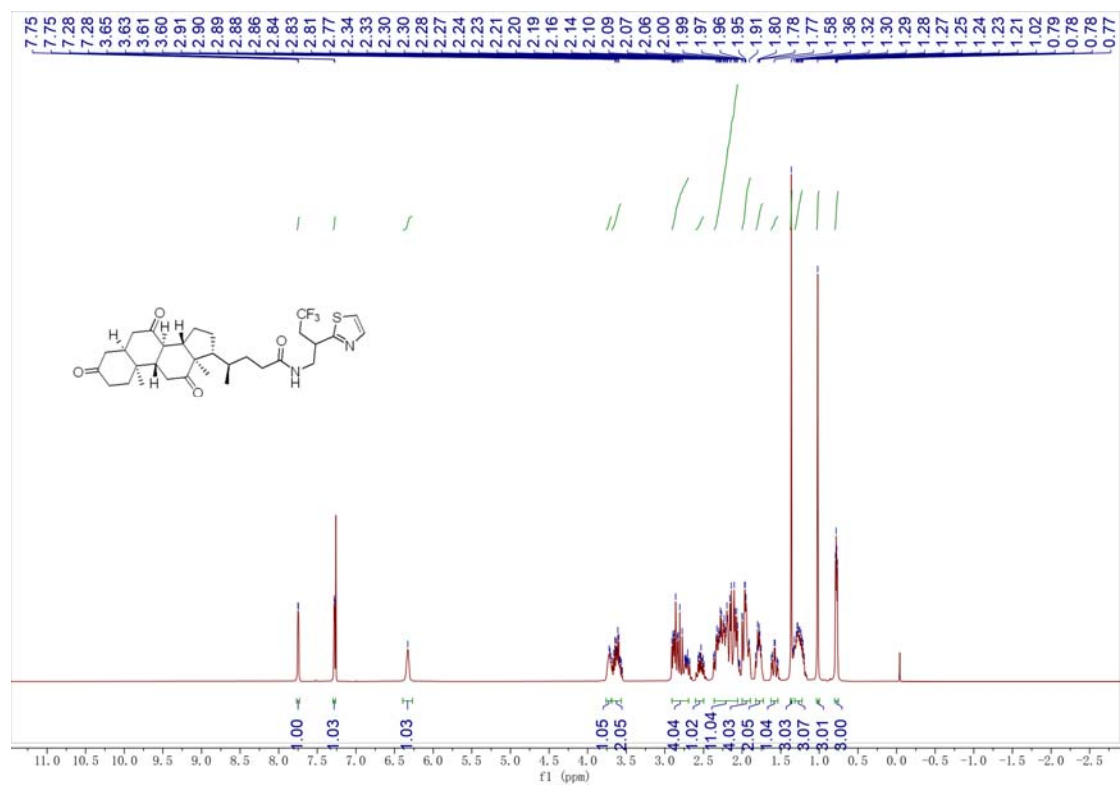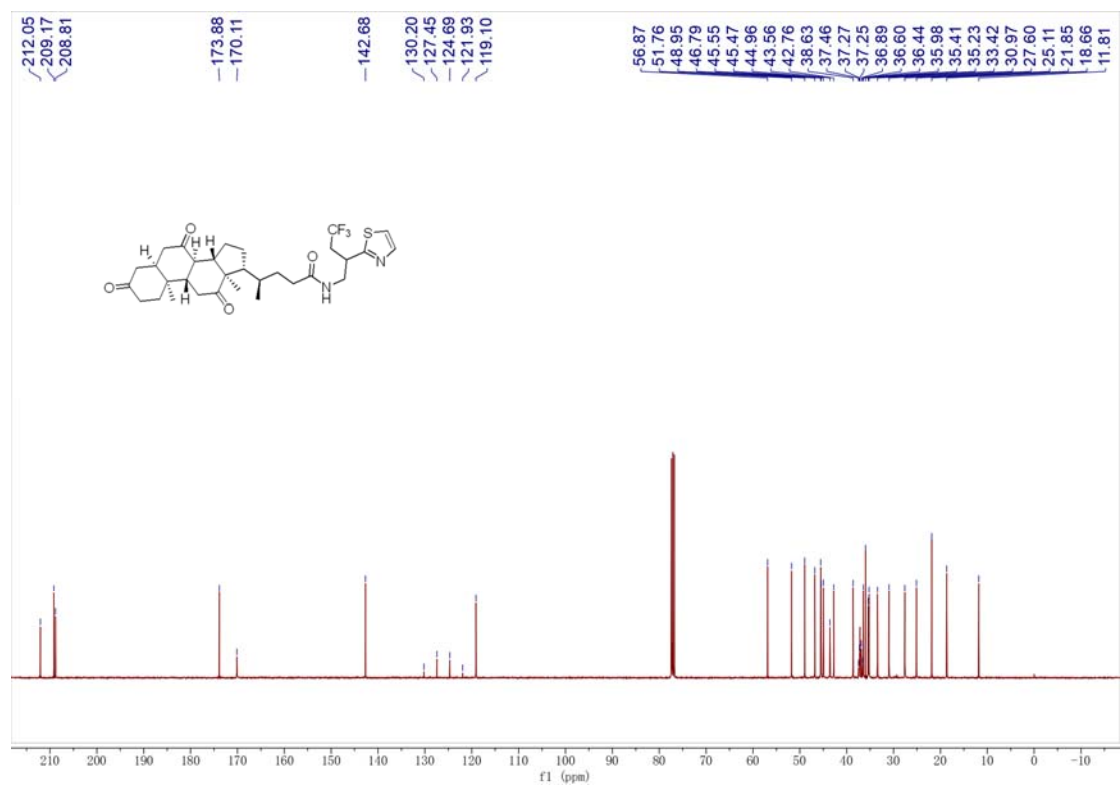

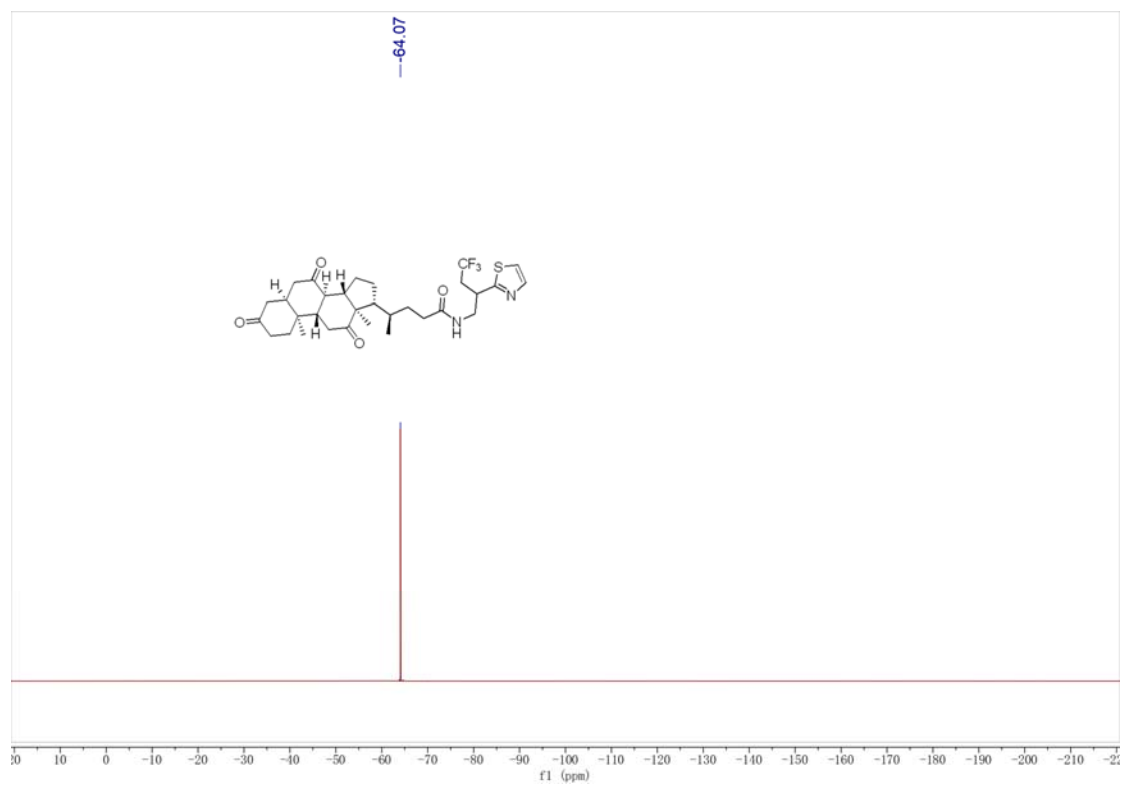



1-(2-(benzo[d]thiazol-2-yl)-4,4,4-trifluorobutyl)-3-phenylthiourea (4)

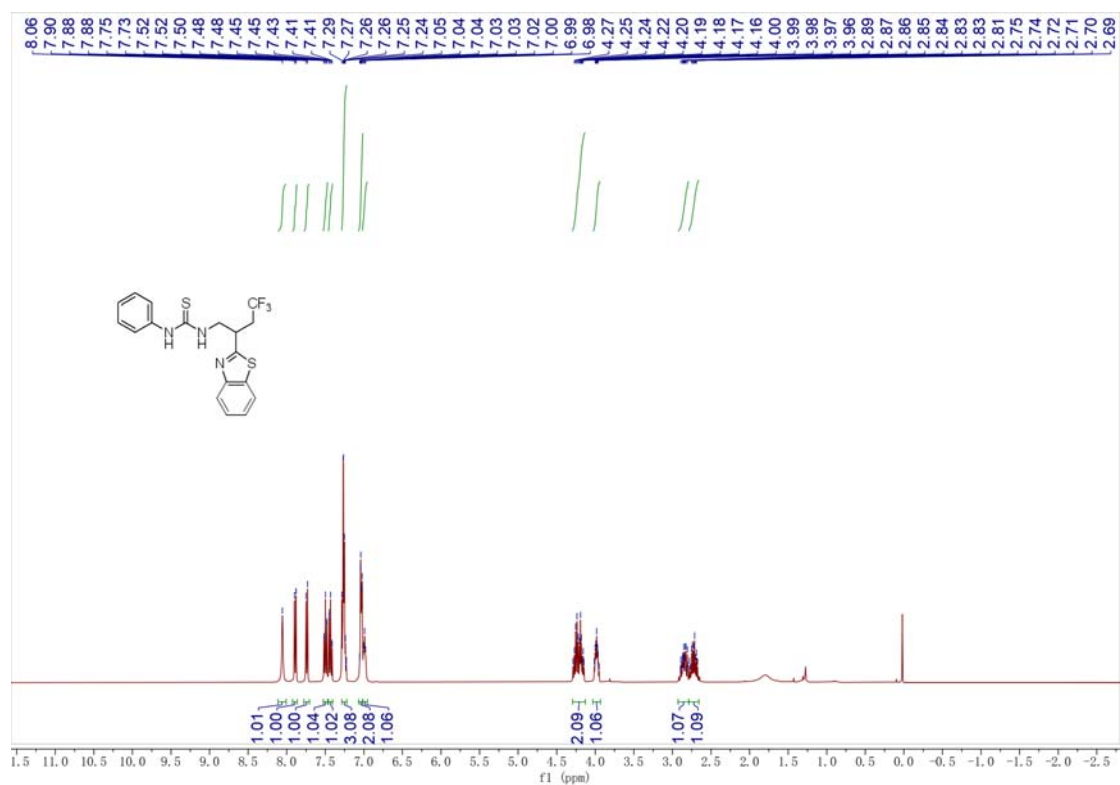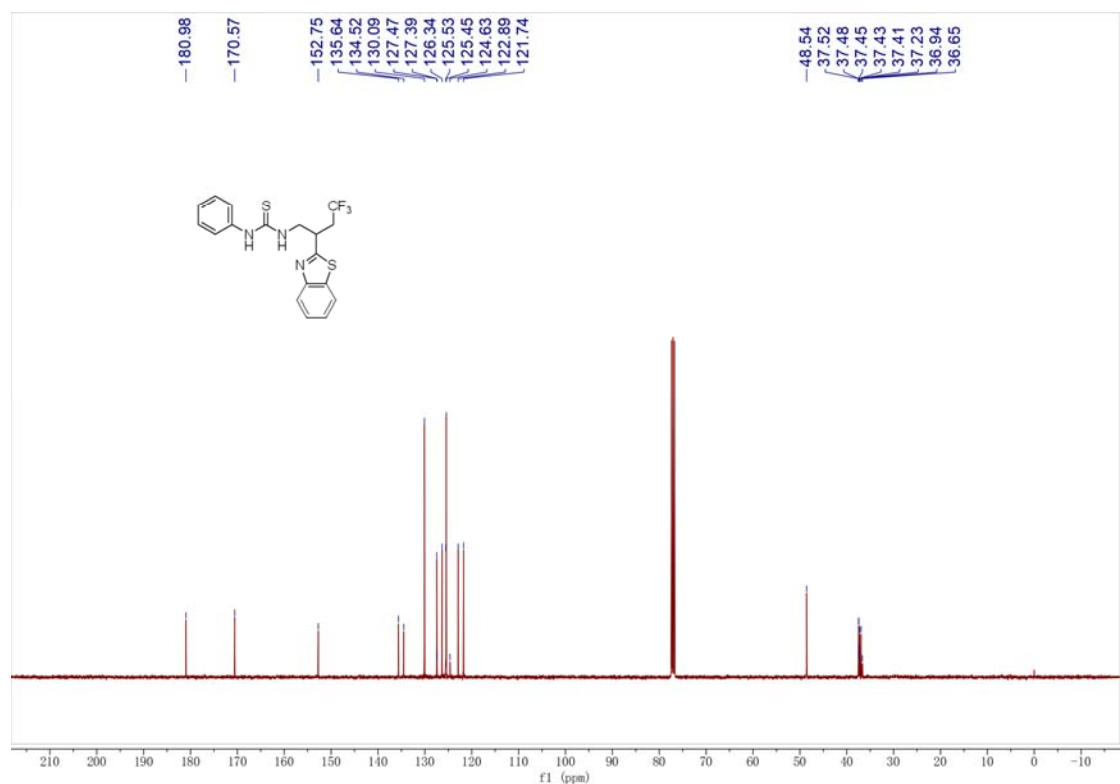

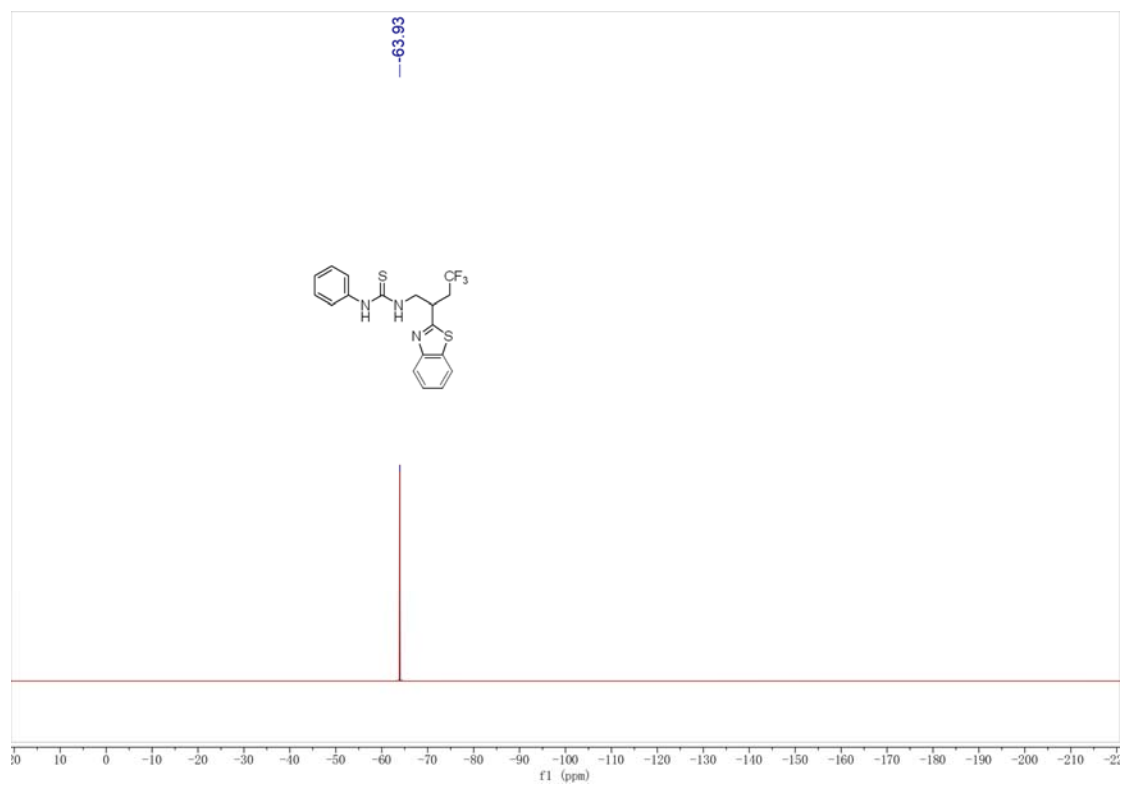

**1-(2-chloro-4-methyl-7-(2,2,2-trifluoroethyl)-6,7-dihydrothieno[3,2-c]pyridin-5(4H)-yl)ethan-1-one (5)**

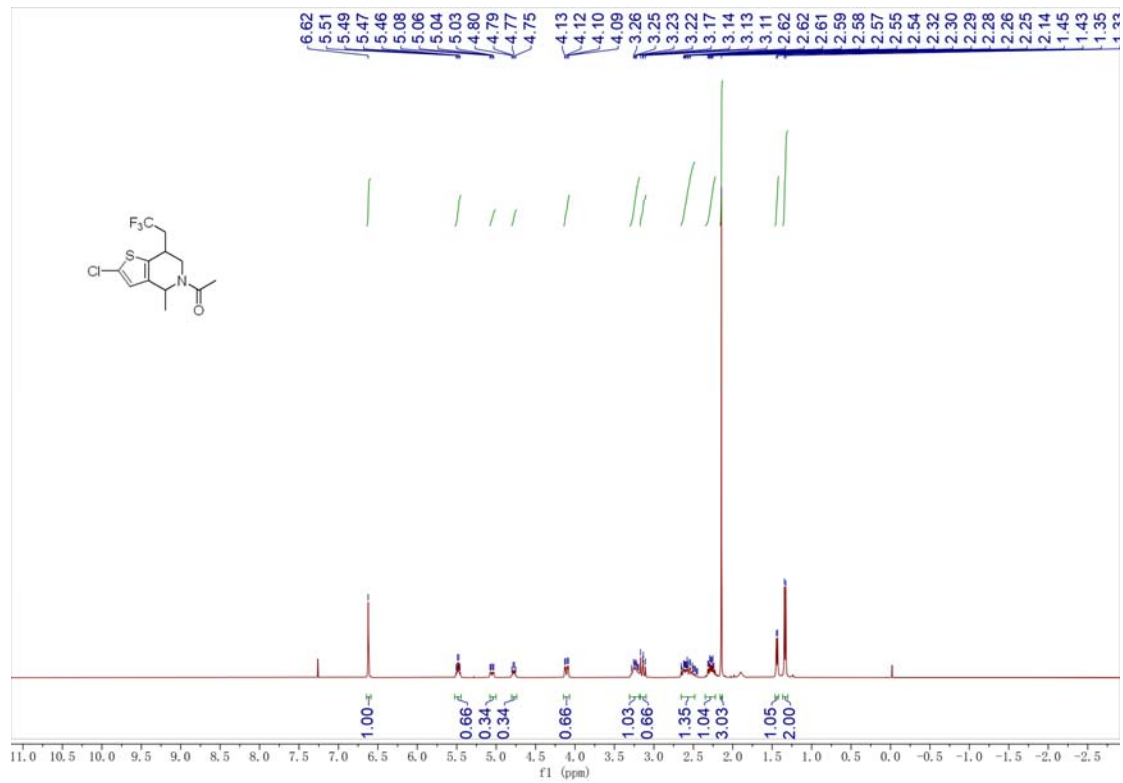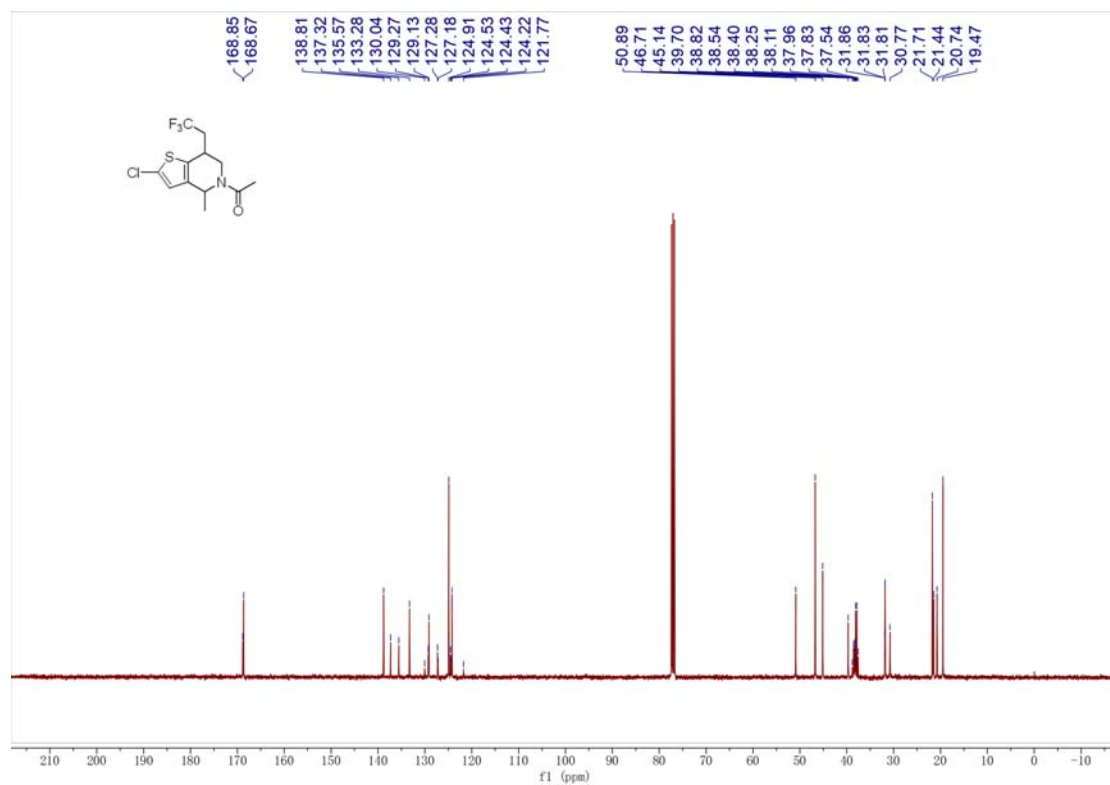

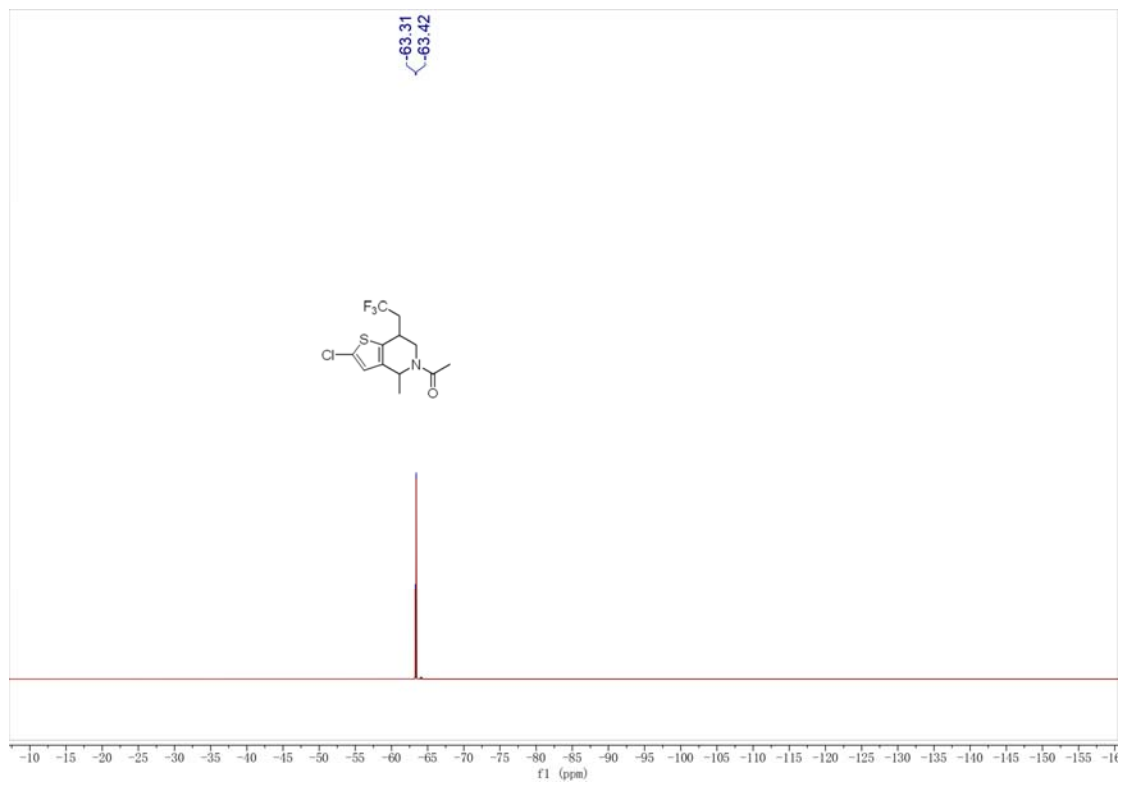

## 9. Reference

- [1] J. Mun, A. A. Jabbar, N. S. Devi, S. Yin, Y. Wang, C. Tan, D. Culver, J. P. Snyder, E. G. Van Meir, M. M. Goodman, *J. Med. Chem.* **2012**, *55*, 6738-6750.
- [2] E. D. Nacs, T. H. Lambert, *Org. Chem. Front.* **2018**, *5*, 64-69.
- [3] S. O. youhei Takeda, Saori Tone, Itsuro Sasaki, Satoshi Minakata, *Org. Lett.* **2012**, *14*, 4874-4877.
- [4] J. Jiang, W. W. Kallemeijn, D. W. Wright, A. van den Nieuwendijk, V. C. Rohde, E. C. Folch, H. van den Elst, B. I. Florea, S. Scheij, W. E. Donker-Koopman, M. Verhoek, N. Li, M. Schurmann, D. Mink, R. G. Boot, J. D. C. Codee, G. A. van der Marel, G. J. Davies, J. Aerts, H. S. Overkleeft, *Chem. Sci.* **2015**, *6*, 2782-2789.
- [5] R. Almansa, D. Guijarro, M. Yus, *Tetrahedron Lett.* **2009**, *50*, 3198-3201.
- [6] Y. Hu, X. Li, B. Wan, *Tetrahedron* **2015**, *71*, 6935-6943.
- [7] N. Radhoff, A. Studer, *Angew. Chem. Int. Ed.* **2021**, *60*, 3561-3565; *Angew. Chem.* **2021**, *133*, 3603-3608.
- [8] Y. K. Yoshihiro Inamoto, Yoshihiro Nishimoto, Makoto Yasuda, and Akio Baba, *Org. Lett.* **2013**, *15*, 3452-3455.
